# Supplementary material for: Gonococcal Genetic Island in the Global Neisseria gonorrhoeae Population: A Model of Genetic Diversity and Association with Resistance to Antimicrobials
Source: MDPI journal article supplement (doi:10.3390/microorganisms11061547), 2023-06-10
Supplement: s1 [file s1]

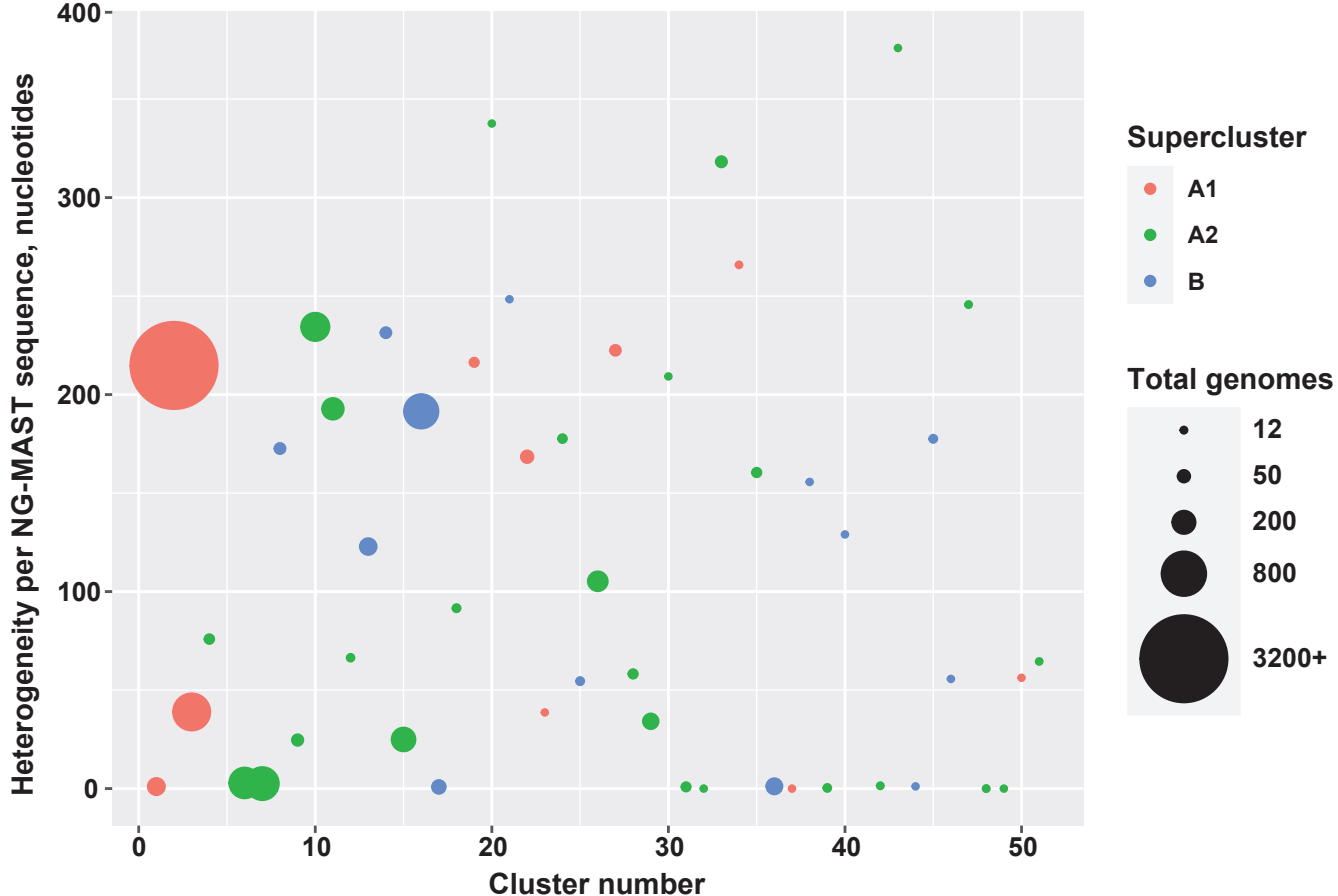

**Figure S3. NG-MAST heterogeneity in GGI clusters. Red color - the cluster belongs to supercluster A1, green - to supercluster A2, blue - to supercluster B. The size of the circles shows the number of genomes in a cluster.**
