# Supplementary material for: Gonococcal Genetic Island in the Global Neisseria gonorrhoeae Population: A Model of Genetic Diversity and Association with Resistance to Antimicrobials
Source: MDPI journal article supplement (doi:10.3390/microorganisms11061547), 2023-06-10
Supplement: s1 [file s1]

**Supercluster A1:**  
(*traG1* allele)

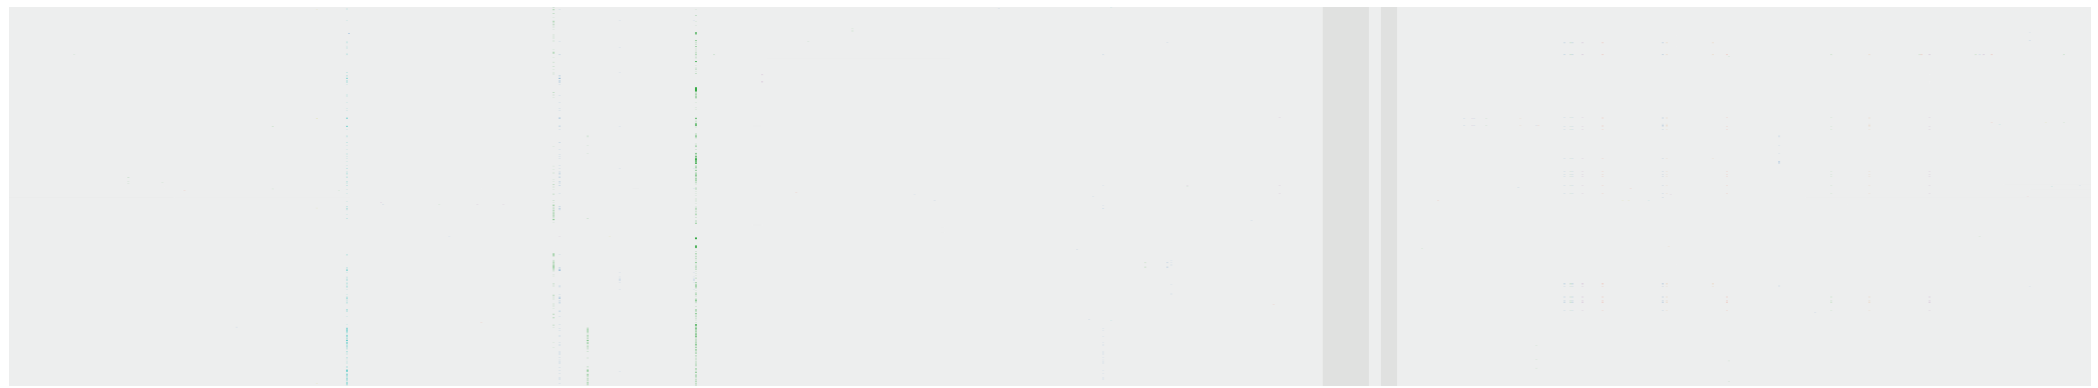

**Supercluster A2:**  
(*traG2* allele)

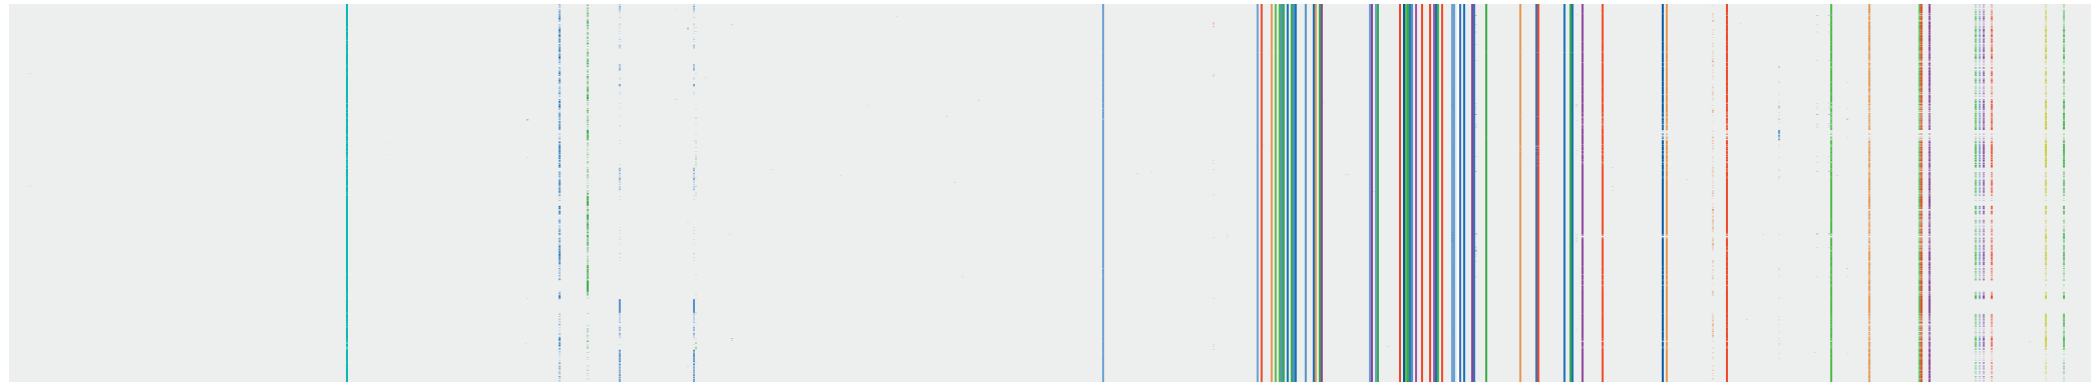

**Supercluster B:**  
(*traG3* allele)

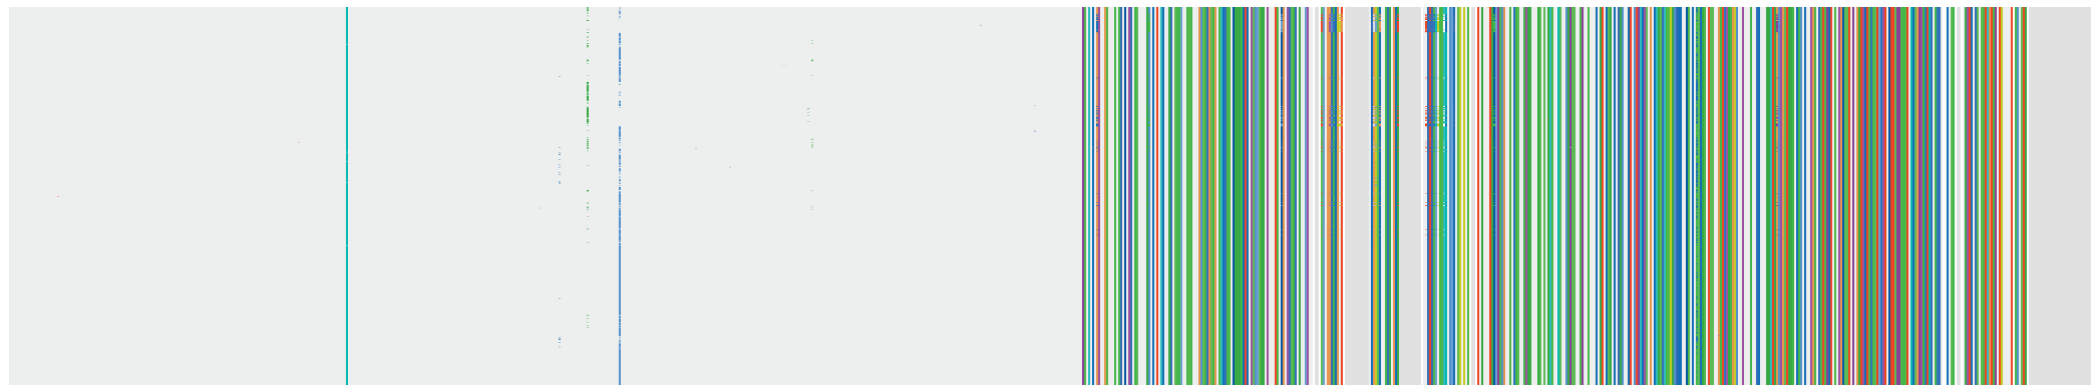

0 100 200 300 400 500 600 700 800 900 1000  
*Codon number*

Figure S2. Alignment of TraG proteins that are present in three GGI superclusters. The light gray color indicates the absence of differences from the MS11 reference genome. Different bright colors indicate amino acid substitutions. Deletions/insertions are marked in dark gray.
