# Supplementary material for: Gonococcal Genetic Island in the Global Neisseria gonorrhoeae Population: A Model of Genetic Diversity and Association with Resistance to Antimicrobials
Source: Microorganisms. 2023 Jun 10;11(6):1547. doi: 10.3390/microorganisms11061547 (PMC10301925; doi:10.3390/microorganisms11061547)
Supplement: Supplementary file 1 [file microorganisms-11-01547-s001.zip]

Archive with 10 entries (10 files):
- Figure S1. Distribution of downloaded N. gonorrhoeae genomes by country.pdf
- Figure S2. Alignment of TraG proteins that are present in 3 GGI superclusters.pdf
- Figure S3. NG-MAST heterogeneity in GGI clusters.pdf
- Figure S4. MLST heterogeneity in GGI clusters.pdf
- Table S1. Characteristics of GGI in 14763 N. gonorrhoeae genomes, AMR and typing data.xlsx
- Table S2. Presence of GGI genes in clusters.xlsx
- Table S3. Population characteristics of GGI genes.xlsx
- Table S4. Distribution of NG-MAST and MLST types in GGI clusters.xlsx
- Table S5. NG-MAST and MLST heterogeneity in clusters.xlsx
- Table S6. Antimicrobial resistance among isolates with different GGI status.xlsx
