# Supplementary material for: Gonococcal Genetic Island in the Global Neisseria gonorrhoeae Population: A Model of Genetic Diversity and Association with Resistance to Antimicrobials
Source: Microorganisms. 2023 Jun 10;11(6):1547. doi: 10.3390/microorganisms11061547 (PMC10301925; doi:10.3390/microorganisms11061547)
Supplement: Supplementary file 1 [file microorganisms-11-01547-s001.zip › Table S1. Characteristics of GGI in 14763 N. gonorrhoeae genomes, AMR and typing data.xlsx]

## Sheet: metadata
Metadata								Results of antimicrobial susceptibility testing														NG-MAST Typing			MLST Typing								NG-STAR Typing								Antimicrobial Resistance Determinants
displayname	Isolation year	Country	Strain	Collection label	EMBL/Genbank Bioproject	EMBL/Genbank Accession	EMBL/Genbank Biosample	Spectinomycin		Tetracycline		Azithromycin		Cefixime		Ceftriaxone		Ciprofloxacin		Penicillin		NG-MAST ST	porB	tbpB	MLST ST	abcZ	adk	aroE	fumC	gdh	pdhC	pgm	NG-STAR ST	penA	mtrR	porB	ponA	gyrA	parC	23S	16S rRNA	23S rRNA		Plasmids (blaTEM, tetM)		Ribosomal proteins (rpsJ, rpID)		Porin Influx Pump (porB)
								Spectinomycin_MIC	Spectinomycin_Predicted	Tetracycline_MIC	Tetracycline_Predicted	Azithromycin_MIC	Azithromycin_Predicted	Cefixime_MIC	Cefixime_Predicted	Ceftriaxone_MIC	Ceftriaxone_Predicted	Ciprofloxacin_MIC	Ciprofloxacin_Predicted	Penicillin_MIC	Penicillin_Predicted																				16S_rDNA_c1184t	23S_rDNA_a2045g	23S_rDNA_c2597t	blaTEM	tetM	rpsJ_V57M	rplD_G70D	porB1b_G120K	porB1b_A121D
ATCC_49226	Not stated	Not stated	ATCC_49226	shaskolskiy2022	PRJNA768989	GCA_025171215.2	SAMN28870224	32	S	1	I	0.5	S	No data	S	0.008	S	0.008	S	0.5	I	1572	1022	6	11075	109	39	67	111	228	71	65	1	22.001	10	13	100	100	2	100	-	-	-	-	-	rpsJ_V57M	-	-	-
ECDC_1820984	2013	Iceland	1820984	EuroGASP2013	PRJEB9227	ERR1549757	SAMEA3468233	No data	S	No data	R	0.125	S	0.016	S	0.006	S	32	R	No data	R	9541	5666	33	11979	109	39	170	157	148	154	65	906	2.008	10	4	100	1	55	100	-	-	-	blaTEM	tetM	rpsJ_V57M	-	-	-
ECDC_1830458	2013	Iceland	1830458	EuroGASP2013	PRJEB9227	ERR1549758	SAMEA3468234	No data	S	No data	I	0.38	S	0.016	S	0.003	S	0.003	S	No data	I	11080	6473	18	8156	59	39	67	111	150	153	65	982	2.017	1	3	1	100	2	100	-	-	-	-	-	-	-	-	-
ECDC_1836157	2013	Iceland	1836157	EuroGASP2013	PRJEB9227	ERR1549759	SAMEA3468237	No data	S	No data	I	0.5	S	0.016	S	0.004	S	0.002	S	No data	I	10640	6226	29	9363	126	39	67	238	148	153	133	301	2.001	9	3	100	100	100	100	-	-	-	-	-	rpsJ_V57M	-	-	-
ECDC_AT13_496	2013	Austria	AT13_496	EuroGASP2013	PRJEB9227	ERR1469609	SAMEA3373511	No data	S	No data	R	No data	S	0.023	S	0.032	S	No data	R	No data	R	6961	4157	137	1588	59	39	67	158	148	71	65	new	19.001	38	12	1	7	26	new	-	-	-	blaTEM	tetM	rpsJ_V57M	-	porB1b_G120K	-
ECDC_AT13_520	2013	Austria	AT13_520	EuroGASP2013	PRJEB9227	ERR1469623	SAMEA3373533	No data	S	No data	I	No data	S	0.023	S	0.008	S	No data	S	No data	I	11580	6787	29	11463	126	39	67	238	734	153	133	63	2.001	9	1	100	100	100	100	-	-	-	-	-	rpsJ_V57M	-	-	-
ECDC_AT18_980028	2018	Austria	Not stated	EuroGASP2018	PRJEB34068	ERR9838891	SAMEA5958683	No data	S	No data	I	2	R	<0,016	S	0.004	S	12	R	No data	I	12302	908	267	9363	126	39	67	238	148	153	133	168	2.001	39	11	100	7	4	100	-	-	-	-	-	rpsJ_V57M	-	porB1b_G120K	-
ECDC_AT18_980029	2018	Austria	Not stated	EuroGASP2018	PRJEB34068	ERR9838895	SAMEA5958684	No data	S	No data	R	0.25	S	0.016	S	0.023	S	6	R	No data	R	new	new	4	7827	59	39	67	158	148	153	65	38	13.001	19	8	1	1	9	100	-	-	-	-	-	rpsJ_V57M	-	porB1b_G120K	porB1b_A121D
ECDC_AT18_980031	2018	Austria	Not stated	EuroGASP2018	PRJEB34068	ERR9837163	SAMEA5958689	No data	S	No data	R	0.25	S	<0,016	S	0.002	S	1.5	R	No data	I	new	new	new	15812	59	39	170	1250	148	154	65	3588	2.002	19	16	100	1	18	100	-	-	-	-	-	rpsJ_V57M	-	-	-
ECDC_AT18_980036	2018	Austria	Not stated	EuroGASP2018	PRJEB34068	ERR9838917	SAMEA5958692	No data	S	No data	I	1	R	0.016	S	0.004	S	6	R	No data	I	12302	908	267	9363	126	39	67	238	148	153	133	168	2.001	39	11	100	7	4	100	-	-	-	-	-	rpsJ_V57M	-	porB1b_G120K	-
ECDC_AT18_980038	2018	Austria	Not stated	EuroGASP2018	PRJEB34068	ERR9838914	SAMEA5958691	No data	S	No data	I	0.75	R	<0,016	S	<0,002	S	1	R	No data	I	new	266	267	9363	126	39	67	238	148	153	133	2187	2.001	39	100	100	7	4	100	-	-	-	-	-	rpsJ_V57M	-	-	-
ECDC_AT18_980039	2018	Austria	Not stated	EuroGASP2018	PRJEB34068	ERR9838983	SAMEA5958694	No data	S	No data	I	1	R	<0,016	S	0.004	S	4	R	No data	I	12302	908	267	9363	126	39	67	238	148	153	133	168	2.001	39	11	100	7	4	100	-	-	-	-	-	rpsJ_V57M	-	porB1b_G120K	-
ECDC_AT18_980249	2018	Austria	Not stated	EuroGASP2018	PRJEB34068	ERR9839065	SAMEA5958517	No data	S	No data	R	0.125	S	<0,016	S	<0,002	S	3	R	No data	I	new	new	136	7822	126	39	170	111	148	153	65	430	2.002	19	100	1	7	3	100	-	-	-	-	tetM	rpsJ_V57M	-	-	-
ECDC_AT18_980251	2018	Austria	Not stated	EuroGASP2018	PRJEB34068	ERR9839073	SAMEA5958520	No data	S	No data	I	0.38	S	0.032	R	0.003	S	0.002	S	No data	I	new	new	18	11428	126	39	170	238	734	153	133	454	34.001	9	1	100	100	100	100	-	-	-	-	-	rpsJ_V57M	-	-	-
ECDC_AT18_980278	2018	Austria	Not stated	EuroGASP2018	PRJEB34068	ERR9839149	SAMEA5958538	No data	S	No data	R	0.094	S	<0,016	S	0.002	S	1.5	R	No data	R	12176	7122	2056	1587	59	39	67	78	148	153	133	719	2.002	89	100	100	7	4	100	-	-	-	blaTEM	tetM	rpsJ_V57M	-	-	-
ECDC_AT18_980290	2018	Austria	Not stated	EuroGASP2018	PRJEB34068	ERR9839177	SAMEA5958545	No data	S	No data	I	0.19	S	<0,016	S	0.002	S	0.003	S	No data	I	2	2	16	11975	59	39	762	111	188	71	223	84	22.001	15	100	100	100	7	100	-	-	-	-	-	rpsJ_V57M	-	-	-
ECDC_AT18_980332	2018	Austria	Not stated	EuroGASP2018	PRJEB34068	ERR9839141	SAMEA5958534	No data	S	No data	R	0.38	S	0.016	S	0.002	S	4	R	No data	R	10386	246	4	7827	59	39	67	158	148	153	65	38	13.001	19	8	1	1	9	100	-	-	-	-	-	rpsJ_V57M	-	porB1b_G120K	porB1b_A121D
ECDC_AT18_980338	2018	Austria	Not stated	EuroGASP2018	PRJEB34068	ERR9839173	SAMEA5958544	No data	S	No data	R	0.19	S	<0,016	S	<0,002	S	0.75	R	No data	R	new	new	2158	1597	59	39	67	78	148	154	65	427	2.002	40	100	100	7	4	100	-	-	-	blaTEM	tetM	rpsJ_V57M	-	-	-
ECDC_AT18_980340	2018	Austria	Not stated	EuroGASP2018	PRJEB34068	ERR9839185	SAMEA5958547	No data	S	No data	R	0.25	S	0.047	S	0.032	S	2	R	No data	R	10386	246	4	7827	59	39	67	158	148	153	65	38	13.001	19	8	1	1	9	100	-	-	-	-	-	rpsJ_V57M	-	porB1b_G120K	porB1b_A121D
ECDC_AT18_980353	2018	Austria	Not stated	EuroGASP2018	PRJEB34068	ERR9838827	SAMEA5958567	No data	S	No data	R	0.125	S	<0,016	S	0.003	S	3	R	No data	I	387	266	118	8143	59	39	170	78	146	154	65	427	2.002	40	100	100	7	4	100	-	-	-	-	tetM	rpsJ_V57M	-	-	-
ECDC_AT18_980361	2018	Austria	Not stated	EuroGASP2018	PRJEB34068	ERR9838831	SAMEA5958568	No data	S	No data	R	0.19	S	<0,016	S	0.002	S	1	R	No data	I	12176	7122	2056	1587	59	39	67	78	148	153	133	719	2.002	89	100	100	7	4	100	-	-	-	-	tetM	rpsJ_V57M	-	-	-
ECDC_AT18_980374	2018	Austria	Not stated	EuroGASP2018	PRJEB34068	ERR9837150	SAMEA5958573	No data	S	No data	R	0.19	S	<0,016	S	<0,002	S	1.5	R	No data	I	387	266	118	8143	59	39	170	78	146	154	65	427	2.002	40	100	100	7	4	100	-	-	-	-	tetM	rpsJ_V57M	-	-	-
ECDC_AT18_980413	2018	Austria	Not stated	EuroGASP2018	PRJEB34068	ERR9839221	SAMEA5958558	No data	S	No data	R	0.19	S	<0,016	S	0.002	S	3	R	No data	R	340	90	4	7822	126	39	170	111	148	153	65	3626	12.001	1	13	1	25	10	100	-	-	-	blaTEM	-	rpsJ_V57M	-	-	-
ECDC_AT18_980455	2018	Austria	Not stated	EuroGASP2018	PRJEB34068	ERR9838855	SAMEA5958575	No data	S	No data	I	0.75	S	<0,016	S	<0,002	S	0.002	S	No data	I	4244	1808	893	11428	126	39	170	238	734	153	133	63	2.001	9	1	100	100	100	100	-	-	-	-	-	rpsJ_V57M	-	-	-
ECDC_AT18_980457	2018	Austria	Not stated	EuroGASP2018	PRJEB34068	ERR9837151	SAMEA5958577	No data	S	No data	I	0.5	S	<0,016	S	0.002	S	1	R	No data	R	12496	90	165	1582	59	39	170	78	148	154	65	2936	2.001	40	13	100	7	4	100	-	-	-	blaTEM	-	rpsJ_V57M	-	-	-
ECDC_AT18_980465	2018	Austria	Not stated	EuroGASP2018	PRJEB34068	ERR9838979	SAMEA5785134	No data	S	No data	R	0.125	S	<0,016	S	<0,002	S	0.75	R	No data	I	new	new	2114	1582	59	39	170	78	148	154	65	3594	2.002	48	19	100	7	18	100	-	-	-	-	tetM	rpsJ_V57M	-	-	-
ECDC_AT18_980533	2018	Austria	Not stated	EuroGASP2018	PRJEB34068	ERR9839047	SAMEA5958616	No data	S	No data	I	1	R	<0,016	S	0.006	S	4	R	No data	I	12302	908	267	9363	126	39	67	238	148	153	133	168	2.001	39	11	100	7	4	100	-	-	-	-	-	rpsJ_V57M	-	porB1b_G120K	-
ECDC_AT18_980550	2018	Austria	Not stated	EuroGASP2018	PRJEB34068	ERR9838994	SAMEA5958597	No data	S	No data	I	2	R	<0,016	S	0.002	S	6	R	No data	I	12302	908	267	9363	126	39	67	238	148	153	133	168	2.001	39	11	100	7	4	100	-	-	-	-	-	rpsJ_V57M	-	porB1b_G120K	-
ECDC_AT18_980552	2018	Austria	Not stated	EuroGASP2018	PRJEB34068	ERR9839002	SAMEA5958599	No data	S	No data	I	0.094	R	<0,016	S	0.002	S	1.5	R	No data	I	12302	908	267	9363	126	39	67	238	148	153	133	168	2.001	39	11	100	7	4	100	-	-	-	-	-	rpsJ_V57M	-	porB1b_G120K	-
ECDC_AT18_980579	2018	Austria	Not stated	EuroGASP2018	PRJEB34068	ERR9839043	SAMEA5958615	No data	S	No data	I	0.047	R	<0,016	S	<0,002	S	1	R	No data	I	12302	908	267	9363	126	39	67	238	148	153	133	168	2.001	39	11	100	7	4	100	-	-	-	-	-	rpsJ_V57M	-	porB1b_G120K	-
ECDC_AT18_980580	2018	Austria	Not stated	EuroGASP2018	PRJEB34068	ERR9839051	SAMEA5958617	No data	S	No data	R	0.25	S	<0,016	S	0.003	S	3	R	No data	I	new	new	136	7822	126	39	170	111	148	153	65	430	2.002	19	100	1	7	3	100	-	-	-	-	tetM	rpsJ_V57M	-	-	-
ECDC_AT18_980587	2018	Austria	Not stated	EuroGASP2018	PRJEB34068	ERR9839080	SAMEA5958625	No data	S	No data	R	0.25	S	<0,016	S	<0,002	S	1	R	No data	I	387	266	118	8143	59	39	170	78	146	154	65	427	2.002	40	100	100	7	4	100	-	-	-	-	tetM	rpsJ_V57M	-	-	-
ECDC_AT18_980588	2018	Austria	Not stated	EuroGASP2018	PRJEB34068	ERR9839084	SAMEA5958626	No data	S	No data	I	1	R	<0,016	S	0.003	S	6	R	No data	I	12302	908	267	9363	126	39	67	238	148	153	133	168	2.001	39	11	100	7	4	100	-	-	-	-	-	rpsJ_V57M	-	porB1b_G120K	-
ECDC_AT18_980602	2018	Austria	Not stated	EuroGASP2018	PRJEB34068	ERR9839135	SAMEA5785138	No data	S	No data	I	0.75	R	<0,016	S	0.003	S	2	R	No data	I	new	5650	267	9363	126	39	67	238	148	153	133	168	2.001	39	11	100	7	4	100	-	-	-	-	-	rpsJ_V57M	-	porB1b_G120K	-
ECDC_AT18_980635	2018	Austria	Not stated	EuroGASP2018	PRJEB34068	ERR9839090	SAMEA5958628	No data	S	No data	I	1	R	<0,016	S	0.002	S	2	R	No data	I	7831	279	29	11422	109	39	67	238	148	153	133	3572	2.001	39	1	100	1	3	100	-	-	-	-	-	rpsJ_V57M	-	-	-
ECDC_AT18_980637	2018	Austria	Not stated	EuroGASP2018	PRJEB34068	ERR9839098	SAMEA5958630	No data	S	No data	I	1.5	R	<0,016	S	0.003	S	6	R	No data	I	12302	908	267	9363	126	39	67	238	148	153	133	168	2.001	39	11	100	7	4	100	-	-	-	-	-	rpsJ_V57M	-	porB1b_G120K	-
ECDC_AT18_980638	2018	Austria	Not stated	EuroGASP2018	PRJEB34068	ERR9839102	SAMEA5958631	No data	S	No data	I	1.5	R	<0,016	S	<0,002	S	4	R	No data	I	12302	908	267	9363	126	39	67	238	148	153	133	168	2.001	39	11	100	7	4	100	-	-	-	-	-	rpsJ_V57M	-	porB1b_G120K	-
ECDC_AT18_980641	2018	Austria	Not stated	EuroGASP2018	PRJEB34068	ERR9839114	SAMEA5958634	No data	S	No data	I	1	R	<0,016	S	0.003	S	6	R	No data	I	12302	908	267	9363	126	39	67	238	148	153	133	168	2.001	39	11	100	7	4	100	-	-	-	-	-	rpsJ_V57M	-	porB1b_G120K	-
ECDC_AT18_980643	2018	Austria	Not stated	EuroGASP2018	PRJEB34068	ERR9839124	SAMEA5785137	No data	S	No data	I	1.5	R	<0,016	S	0.004	S	6	R	No data	I	12302	908	267	9363	126	39	67	238	148	153	133	168	2.001	39	11	100	7	4	100	-	-	-	-	-	rpsJ_V57M	-	porB1b_G120K	-
ECDC_AT18_980645	2018	Austria	Not stated	EuroGASP2018	PRJEB34068	ERR9839132	SAMEA5785139	No data	S	No data	I	1.5	R	<0,016	S	0.003	S	4	R	No data	I	12302	908	267	9363	126	39	67	238	148	153	133	168	2.001	39	11	100	7	4	100	-	-	-	-	-	rpsJ_V57M	-	porB1b_G120K	-
ECDC_AT18_980659	2018	Austria	Not stated	EuroGASP2018	PRJEB34068	ERR9839198	SAMEA5958652	No data	S	No data	I	2	R	<0,016	S	0.004	S	6	R	No data	I	12302	908	267	9363	126	39	67	238	148	153	133	168	2.001	39	11	100	7	4	100	-	-	-	-	-	rpsJ_V57M	-	porB1b_G120K	-
ECDC_AT18_980700	2018	Austria	Not stated	EuroGASP2018	PRJEB34068	ERR9838804	SAMEA5958659	No data	S	No data	I	2	R	<0,016	S	0.006	S	4	R	No data	I	12302	908	267	9363	126	39	67	238	148	153	133	168	2.001	39	11	100	7	4	100	-	-	-	-	-	rpsJ_V57M	-	porB1b_G120K	-
ECDC_AT18_980722	2018	Austria	Not stated	EuroGASP2018	PRJEB34068	ERR9838817	SAMEA5958663	No data	S	No data	I	1.5	R	0.016	S	0.004	S	1	R	No data	I	new	266	267	9363	126	39	67	238	148	153	133	2187	2.001	39	100	100	7	4	100	-	-	-	-	-	rpsJ_V57M	-	-	-
ECDC_AT18_980751	2018	Austria	Not stated	EuroGASP2018	PRJEB34068	ERR9839156	SAMEA5958641	No data	S	No data	I	1.5	R	0.016	S	0.003	S	6	R	No data	I	12302	908	267	9363	126	39	67	238	148	153	133	168	2.001	39	11	100	7	4	100	-	-	-	-	-	rpsJ_V57M	-	porB1b_G120K	-
ECDC_AT18_980755	2018	Austria	Not stated	EuroGASP2018	PRJEB34068	ERR9839161	SAMEA5958642	No data	S	No data	I	2	R	<0,016	S	0.004	S	3	R	No data	I	12302	908	267	9363	126	39	67	238	148	153	133	168	2.001	39	11	100	7	4	100	-	-	-	-	-	rpsJ_V57M	-	porB1b_G120K	-
ECDC_AT18_980758	2018	Austria	Not stated	EuroGASP2018	PRJEB34068	ERR9839190	SAMEA5958650	No data	S	No data	R	0.25	S	0.047	S	0.032	S	6	R	No data	R	10386	246	4	7827	59	39	67	158	148	153	65	38	13.001	19	8	1	1	9	100	-	-	-	-	-	rpsJ_V57M	-	porB1b_G120K	porB1b_A121D
ECDC_AT18_980760	2018	Austria	Not stated	EuroGASP2018	PRJEB34068	ERR9839210	SAMEA5958655	No data	S	No data	R	0.125	S	<0,016	S	<0,002	S	1	R	No data	R	9918	5860	953	1587	59	39	67	78	148	153	133	719	2.002	89	100	100	7	4	100	-	-	-	blaTEM	tetM	rpsJ_V57M	-	-	-
ECDC_AT18_980761	2018	Austria	Not stated	EuroGASP2018	PRJEB34068	ERR9839214	SAMEA5958656	No data	S	No data	I	1.5	R	<0,016	S	0.002	S	6	R	No data	I	12302	908	267	9363	126	39	67	238	148	153	133	168	2.001	39	11	100	7	4	100	-	-	-	-	-	rpsJ_V57M	-	porB1b_G120K	-
ECDC_AT18_980762	2018	Austria	Not stated	EuroGASP2018	PRJEB34068	ERR9839218	SAMEA5958657	No data	S	No data	I	1.5	R	<0,016	S	0.002	S	3	R	No data	I	12302	908	267	9363	126	39	67	238	148	153	133	168	2.001	39	11	100	7	4	100	-	-	-	-	-	rpsJ_V57M	-	porB1b_G120K	-
ECDC_AT18_980771	2018	Austria	Not stated	EuroGASP2018	PRJEB34068	ERR9838853	SAMEA5958673	No data	S	No data	I	2	R	<0,016	S	0.004	S	4	R	No data	I	12302	908	267	9363	126	39	67	238	148	153	133	168	2.001	39	11	100	7	4	100	-	-	-	-	-	rpsJ_V57M	-	porB1b_G120K	-
ECDC_AT18_980779	2018	Austria	Not stated	EuroGASP2018	PRJEB34068	ERR9838861	SAMEA5958675	No data	S	No data	I	4	R	0.016	S	0.003	S	8	R	No data	I	new	5650	267	9363	126	39	67	238	148	153	133	168	2.001	39	11	100	7	4	100	-	-	-	-	-	rpsJ_V57M	-	porB1b_G120K	-
ECDC_AT18_980805	2018	Austria	Not stated	EuroGASP2018	PRJEB34068	ERR9838825	SAMEA5958665	No data	S	No data	R	0.19	S	0.023	S	0.008	S	0.38	R	No data	R	14769	55	1971	1583	59	39	67	111	148	153	65	539	43.002	122	1	100	7	6	100	-	-	-	blaTEM	tetM	rpsJ_V57M	-	-	-
ECDC_AT18_980806	2018	Austria	Not stated	EuroGASP2018	PRJEB34068	ERR9838826	SAMEA5958666	No data	S	No data	I	2	R	<0,016	S	0.004	S	8	R	No data	I	new	5650	267	9363	126	39	67	238	148	153	133	168	2.001	39	11	100	7	4	100	-	-	-	-	-	rpsJ_V57M	-	porB1b_G120K	-
ECDC_AT18_980807	2018	Austria	Not stated	EuroGASP2018	PRJEB34068	ERR9838833	SAMEA5958668	No data	S	No data	I	1.5	R	<0,016	S	0.002	S	1	R	No data	I	new	266	267	9363	126	39	67	238	148	153	133	2187	2.001	39	100	100	7	4	100	-	-	-	-	-	rpsJ_V57M	-	-	-
ECDC_AT18_980808	2018	Austria	Not stated	EuroGASP2018	PRJEB34068	ERR9838837	SAMEA5958669	No data	S	No data	I	1.5	R	<0,016	S	0.002	S	3	R	No data	I	new	5650	267	9363	126	39	67	238	148	153	133	168	2.001	39	11	100	7	4	100	-	-	-	-	-	rpsJ_V57M	-	porB1b_G120K	-
ECDC_AT18_980810	2018	Austria	Not stated	EuroGASP2018	PRJEB34068	ERR9838857	SAMEA5958674	No data	S	No data	I	1.5	R	<0,016	S	0.004	S	4	R	No data	I	12302	908	267	9363	126	39	67	238	148	153	133	168	2.001	39	11	100	7	4	100	-	-	-	-	-	rpsJ_V57M	-	porB1b_G120K	-
ECDC_BE13_446	2013	Belgium	BE13_446	EuroGASP2013	PRJEB9227	ERR1528235	SAMEA3431953	No data	S	No data	I	0.5	S	0.008	S	0.008	S	4	R	No data	R	1691	90	137	8143	59	39	170	78	146	154	65	426	2.002	40	13	100	7	4	100	-	-	-	blaTEM	-	rpsJ_V57M	-	-	-
ECDC_BE13_450	2013	Belgium	BE13_450	EuroGASP2013	PRJEB9227	ERR1528239	SAMEA3431958	No data	S	No data	I	0.5	S	0.008	S	0.008	S	4	R	No data	I	5624	90	953	8143	59	39	170	78	146	154	65	426	2.002	40	13	100	7	4	100	-	-	-	-	-	rpsJ_V57M	-	-	-
ECDC_BE13_457	2013	Belgium	BE13_457	EuroGASP2013	PRJEB9227	ERR1514755	SAMEA3431962	No data	S	No data	R	0.06	S	0.008	S	0.004	S	1	R	No data	R	11009	361	60	11365	59	112	67	158	148	71	65	861	14.001	10	100	1	7	7	100	-	-	-	blaTEM	tetM	rpsJ_V57M	-	-	-
ECDC_BE13_461	2013	Belgium	BE13_461	EuroGASP2013	PRJEB9227	ERR1514758	SAMEA3431965	No data	S	No data	I	0.25	S	0.008	S	0.002	S	0.004	S	No data	I	2992	1808	29	11428	126	39	170	238	734	153	133	new	2.001	9	1	100	100	100	new	-	-	-	-	-	rpsJ_V57M	-	-	-
ECDC_BE13_462	2013	Belgium	BE13_462	EuroGASP2013	PRJEB9227	ERR1514760	SAMEA3431968	No data	S	No data	I	0.5	S	0.008	S	0.004	S	0.004	S	No data	I	2992	1808	29	11428	126	39	170	238	734	153	133	new	2.001	9	1	100	100	100	new	-	-	-	-	-	rpsJ_V57M	-	-	-
ECDC_BE13_466	2013	Belgium	BE13_466	EuroGASP2013	PRJEB9227	ERR1514764	SAMEA3431977	No data	S	No data	I	0.5	S	0.03	S	0.008	S	0.004	S	No data	I	2992	1808	29	9363	126	39	67	238	148	153	133	63	2.001	9	1	100	100	100	100	-	-	-	-	-	rpsJ_V57M	-	-	-
ECDC_BE13_469	2013	Belgium	BE13_469	EuroGASP2013	PRJEB9227	ERR1514766	SAMEA3431981	No data	S	No data	I	0.125	S	0.008	S	0.004	S	0.004	S	No data	I	226	22	16	11975	59	39	762	111	188	71	223	917	22.011	15	100	100	100	7	100	-	-	-	-	-	rpsJ_V57M	-	-	-
ECDC_BE13_470	2013	Belgium	BE13_470	EuroGASP2013	PRJEB9227	ERR1514767	SAMEA3431984	No data	S	No data	I	0.5	S	0.008	S	0.004	S	8	R	No data	R	5624	90	953	11971	59	39	170	158	146	154	65	779	2.002	40	13	100	7	55	100	-	-	-	blaTEM	-	rpsJ_V57M	-	-	-
ECDC_BE13_471	2013	Belgium	BE13_471	EuroGASP2013	PRJEB9227	ERR1514768	SAMEA3431986	No data	S	No data	I	0.25	S	0.008	S	0.004	S	2	R	No data	I	5624	90	953	8143	59	39	170	78	146	154	65	new	2.002	40	13	100	7	4	new	-	-	-	-	-	rpsJ_V57M	-	-	-
ECDC_BE13_473	2013	Belgium	BE13_473	EuroGASP2013	PRJEB9227	ERR1514774	SAMEA3431997	No data	S	No data	I	0.5	S	0.015	S	0.004	S	0.004	S	No data	I	2992	1808	29	11428	126	39	170	238	734	153	133	new	2.001	9	1	100	100	100	new	-	-	-	-	-	rpsJ_V57M	-	-	-
ECDC_BE13_479	2013	Belgium	BE13_479	EuroGASP2013	PRJEB9227	ERR1514775	SAMEA3431998	No data	S	No data	I	0.5	S	0.008	S	0.004	S	0.004	S	No data	I	4397	2702	29	9363	126	39	67	238	148	153	133	new	2.001	9	1	100	100	100	new	-	-	-	-	-	rpsJ_V57M	-	-	-
ECDC_BE13_486	2013	Belgium	BE13_486	EuroGASP2013	PRJEB9227	ERR1514781	SAMEA3432004	No data	S	No data	I	0.25	S	0.008	S	0.004	S	2	R	No data	I	5624	90	953	8143	59	39	170	78	146	154	65	new	2.002	40	13	100	7	4	new	-	-	-	-	-	rpsJ_V57M	-	-	-
ECDC_BE13_488	2013	Belgium	BE13_488	EuroGASP2013	PRJEB9227	ERR1514783	SAMEA3432006	No data	S	No data	I	0.125	S	0.015	S	0.015	S	8	R	No data	R	11012	1893	21	1588	59	39	67	158	148	71	65	871	19.001	24	12	1	7	15	100	-	-	-	blaTEM	-	rpsJ_V57M	-	porB1b_G120K	-
ECDC_BE13_489	2013	Belgium	BE13_489	EuroGASP2013	PRJEB9227	ERR1514787	SAMEA3432287	No data	S	No data	I	0.5	S	0.03	S	0.015	S	0.004	S	No data	I	2992	1808	29	9362	126	39	67	238	147	153	133	63	2.001	9	1	100	100	100	100	-	-	-	-	-	rpsJ_V57M	-	-	-
ECDC_BE13_491	2013	Belgium	BE13_491	EuroGASP2013	PRJEB9227	ERR1514786	SAMEA3432202	No data	S	No data	I	0.5	S	0.008	S	0.004	S	0.004	S	No data	I	11013	3281	137	11983	126	39	67	238	734	71	133	new	2.001	9	1	100	100	100	new	-	-	-	-	-	rpsJ_V57M	-	-	-
ECDC_BE13_492	2013	Belgium	BE13_492	EuroGASP2013	PRJEB9227	ERR1514790	SAMEA3432413	No data	S	No data	I	0.5	S	0.015	S	0.008	S	0.004	S	No data	I	2992	1808	29	9363	126	39	67	238	148	153	133	63	2.001	9	1	100	100	100	100	-	-	-	-	-	rpsJ_V57M	-	-	-
ECDC_BE13_495	2013	Belgium	BE13_495	EuroGASP2013	PRJEB9227	ERR1514792	SAMEA3432415	No data	S	No data	I	0.5	S	0.008	S	0.004	S	0.004	S	No data	I	2992	1808	29	11428	126	39	170	238	734	153	133	new	2.001	9	1	100	100	100	new	-	-	-	-	-	rpsJ_V57M	-	-	-
ECDC_BE18_502	2018	Belgium	Not stated	EuroGASP2018	PRJEB34068	ERR9838653	SAMEA6105964	No data	S	No data	I	2	S	0.015	S	0.032	S	0.016	S	No data	I	7651	263	29	1580	126	39	67	111	148	153	133	240	2.001	25	1	100	100	100	100	-	-	-	-	-	rpsJ_V57M	-	-	-
ECDC_BE18_506	2018	Belgium	Not stated	EuroGASP2018	PRJEB34068	ERR9838428	SAMEA6105968	No data	S	No data	R	0.19	S	0.008	S	<0,016	S	3	R	No data	R	14769	55	1971	1583	59	39	67	111	148	153	65	3543	43.002	122	1	1	7	6	100	-	-	-	blaTEM	tetM	rpsJ_V57M	-	-	-
ECDC_BE18_508	2018	Belgium	Not stated	EuroGASP2018	PRJEB34068	ERR9838248	SAMEA6105970	No data	S	No data	S	0.047	S	0.002	S	<0,016	S	0.002	S	No data	I	new	new	29	1580	126	39	67	111	148	153	133	2655	93.001	25	3	100	100	100	100	-	-	-	-	-	-	rplD_G70D	-	-
ECDC_BE18_516	2018	Belgium	Not stated	EuroGASP2018	PRJEB34068	ERR9838463	SAMEA6105982	No data	S	No data	R	0.25	S	0.015	S	<0,016	S	4	R	No data	I	14700	3031	4	13489	59	39	67	158	148	153	918	1225	13.001	19	3	1	1	9	100	-	-	-	-	-	rpsJ_V57M	-	-	-
ECDC_BE18_523	2018	Belgium	Not stated	EuroGASP2018	PRJEB34068	ERR9839385	SAMEA6106341	No data	S	No data	R	0.047	S	0.008	S	<0,016	S	0.5	R	No data	I	new	5933	98	9901	59	39	67	190	148	154	65	3705	69.001	54	4	100	1	18	100	-	-	-	-	tetM	rpsJ_V57M	-	-	-
ECDC_BE18_524	2018	Belgium	Not stated	EuroGASP2018	PRJEB34068	ERR9839386	SAMEA6106342	No data	S	No data	R	0.023	S	0.015	S	<0,016	S	2	R	No data	R	new	139	133	8111	126	39	170	158	148	71	65	3645	14.001	57	100	1	1	22	100	-	-	-	blaTEM	tetM	rpsJ_V57M	-	-	-
ECDC_BE18_533	2018	Belgium	Not stated	EuroGASP2018	PRJEB34068	ERR9839461	SAMEA6106365	No data	S	No data	R	0.094	S	0.015	S	<0,016	S	0.75	R	No data	R	new	147	new	1588	59	39	67	158	148	71	65	271	19.001	47	14	1	7	17	100	-	-	-	blaTEM	tetM	rpsJ_V57M	-	-	-
ECDC_BE18_535	2018	Belgium	Not stated	EuroGASP2018	PRJEB34068	ERR9839306	SAMEA6106425	No data	S	No data	R	0.094	S	0.008	S	<0,016	S	0.003	S	No data	I	5985	3575	1189	12462	59	39	785	157	188	153	65	new	14.001	10	3	100	100	1	new	-	-	-	-	tetM	rpsJ_V57M	-	-	-
ECDC_BE18_540	2018	Belgium	Not stated	EuroGASP2018	PRJEB34068	ERR9839434	SAMEA6106729	No data	S	No data	R	0.19	S	0.015	S	<0,016	S	0.75	R	No data	I	14769	55	1971	1583	59	39	67	111	148	153	65	539	43.002	122	1	100	7	6	100	-	-	-	-	tetM	rpsJ_V57M	-	-	-
ECDC_BE18_543	2018	Belgium	Not stated	EuroGASP2018	PRJEB34068	ERR9839316	SAMEA6106427	No data	S	No data	I	0.19	S	0.008	S	<0,016	S	1	R	No data	I	5624	90	953	8143	59	39	170	78	146	154	65	426	2.002	40	13	100	7	4	100	-	-	-	-	-	rpsJ_V57M	-	-	-
ECDC_BE18_551	2018	Belgium	Not stated	EuroGASP2018	PRJEB34068	ERR9838627	SAMEA6105951	No data	S	No data	R	0.19	S	0.03	S	0.016	S	0.5	R	No data	R	15589	7738	1971	1583	59	39	67	111	148	153	65	1340	43.002	122	100	100	7	6	100	-	-	-	blaTEM	tetM	rpsJ_V57M	-	-	-
ECDC_BE18_556	2018	Belgium	Not stated	EuroGASP2018	PRJEB34068	ERR9839405	SAMEA6106346	No data	S	No data	I	1.5	R	0.03	S	0.023	S	0.016	S	No data	I	new	new	29	9363	126	39	67	238	148	153	133	193	2.001	39	11	100	100	100	100	-	-	-	-	-	rpsJ_V57M	-	porB1b_G120K	-
ECDC_BE18_557	2018	Belgium	Not stated	EuroGASP2018	PRJEB34068	ERR9839409	SAMEA6106349	No data	S	No data	I	1.5	R	0.015	S	0.023	S	24	R	No data	I	12302	908	267	9363	126	39	67	238	148	153	133	168	2.001	39	11	100	7	4	100	-	-	-	-	-	rpsJ_V57M	-	porB1b_G120K	-
ECDC_BE18_559	2018	Belgium	Not stated	EuroGASP2018	PRJEB34068	ERR9839415	SAMEA6106350	No data	S	No data	I	0.25	S	0.008	S	<0,016	S	6	R	No data	R	9918	5860	953	8143	59	39	170	78	146	154	65	436	2.002	40	100	100	7	3	100	-	-	-	blaTEM	-	rpsJ_V57M	-	-	-
ECDC_BE18_562	2018	Belgium	Not stated	EuroGASP2018	PRJEB34068	ERR9839329	SAMEA6106429	No data	S	No data	I	0.38	S	0.015	S	<0,016	S	0.003	S	No data	I	9208	1808	18	13292	126	39	785	156	148	153	133	439	2.001	9	1	100	100	1	100	-	-	-	-	-	rpsJ_V57M	-	-	-
ECDC_BE18_570	2018	Belgium	Not stated	EuroGASP2018	PRJEB34068	ERR9839330	SAMEA6106433	No data	S	No data	I	0.25	S	0.008	S	<0,016	S	6	R	No data	R	9918	5860	953	8143	59	39	170	78	146	154	65	436	2.002	40	100	100	7	3	100	-	-	-	blaTEM	-	rpsJ_V57M	-	-	-
ECDC_BE18_573	2018	Belgium	Not stated	EuroGASP2018	PRJEB34068	ERR9839421	SAMEA6106724	No data	S	No data	I	0.032	S	0.008	S	<0,016	S	2	R	No data	R	5624	90	953	8143	59	39	170	78	146	154	65	3604	2.002	412	13	100	7	4	100	-	-	-	blaTEM	-	rpsJ_V57M	-	-	-
ECDC_BE18_575	2018	Belgium	Not stated	EuroGASP2018	PRJEB34068	ERR9838395	SAMEA6106149	No data	S	No data	I	0.047	S	0.004	S	<0,016	S	0.002	S	No data	I	2	2	16	15822	59	39	1184	111	188	71	223	84	22.001	15	100	100	100	7	100	-	-	-	-	-	rpsJ_V57M	-	-	-
ECDC_BE18_577	2018	Belgium	Not stated	EuroGASP2018	PRJEB34068	ERR9839438	SAMEA6106730	No data	S	No data	R	0.125	S	0.03	S	0.023	S	2	R	No data	I	new	6720	4	7827	59	39	67	158	148	153	65	1225	13.001	19	3	1	1	9	100	-	-	-	-	-	rpsJ_V57M	-	-	-
ECDC_BE18_578	2018	Belgium	Not stated	EuroGASP2018	PRJEB34068	ERR9838266	SAMEA6106014	No data	S	No data	R	0.094	S	0.015	S	<0,016	S	3	R	No data	R	new	new	2056	1587	59	39	67	78	148	153	133	1204	2.002	89	12	100	7	4	100	-	-	-	blaTEM	tetM	rpsJ_V57M	-	porB1b_G120K	-
ECDC_BE18_581	2018	Belgium	Not stated	EuroGASP2018	PRJEB34068	ERR9839233	SAMEA6106252	No data	S	No data	I	0.38	S	0.015	S	<0,016	S	0.003	S	No data	I	new	6720	18	13292	126	39	785	156	148	153	133	2620	2.001	9	3	100	100	1	100	-	-	-	-	-	rpsJ_V57M	-	-	-
ECDC_BE18_587	2018	Belgium	Not stated	EuroGASP2018	PRJEB34068	ERR9838216	SAMEA6106157	No data	S	No data	I	0.047	S	0.004	S	<0,016	S	0.002	S	No data	I	new	new	16	11975	59	39	762	111	188	71	223	3687	22.016	15	100	100	100	7	100	-	-	-	-	-	rpsJ_V57M	-	-	-
ECDC_BE18_589	2018	Belgium	Not stated	EuroGASP2018	PRJEB34068	ERR9839427	SAMEA6106353	No data	S	No data	I	1.5	R	0.015	S	0.016	S	8	R	No data	I	new	new	39	9363	126	39	67	238	148	153	133	1487	2.001	39	1	100	7	4	100	-	-	-	-	-	rpsJ_V57M	-	-	-
ECDC_BE18_593	2018	Belgium	Not stated	EuroGASP2018	PRJEB34068	ERR9839439	SAMEA6106357	No data	S	No data	R	0.125	S	0.06	S	0.094	S	32	R	No data	R	10386	246	4	7827	59	39	67	158	148	153	65	38	13.001	19	8	1	1	9	100	-	-	-	-	-	rpsJ_V57M	-	porB1b_G120K	porB1b_A121D
ECDC_BE18_594	2018	Belgium	Not stated	EuroGASP2018	PRJEB34068	ERR9839441	SAMEA6106358	No data	S	No data	R	0.19	S	0.06	S	0.064	S	>32	R	No data	R	10386	246	4	7827	59	39	67	158	148	153	65	38	13.001	19	8	1	1	9	100	-	-	-	-	-	rpsJ_V57M	-	porB1b_G120K	porB1b_A121D
ECDC_CY13_006	2013	Cyprus	CY13-006	EuroGASP2013	PRJEB9227	ERR1555226	SAMEA3468285	No data	S	No data	I	No data	S	0.016	S	0.006	S	No data	R	No data	R	new	new	1412	1582	59	39	170	78	148	154	65	899	2.002	54	14	100	1	20	100	-	-	-	blaTEM	-	rpsJ_V57M	-	-	-
ECDC_CY18_M4153	2018	Cyprus	Not stated	EuroGASP2018	PRJEB34068	ERR9837534	SAMEA5958416	No data	S	No data	R	0.094	S	<0,016	S	0.006	S	1	R	No data	R	new	new	33	1587	59	39	67	78	148	153	133	1139	2.002	89	1	100	7	4	100	-	-	-	blaTEM	tetM	rpsJ_V57M	-	-	-
ECDC_CY18_M418	2018	Cyprus	Not stated	EuroGASP2018	PRJEB34068	ERR9837277	SAMEA5958415	No data	S	No data	R	>256	R	0.023	S	0.023	S	>32	R	No data	R	14850	581	2479	12039	126	39	170	158	148	786	65	202	2.002	19	8	1	7	3	1	-	23S_rDNA_a2045g	-	-	tetM	rpsJ_V57M	-	porB1b_G120K	porB1b_A121D
ECDC_CY18_M5883	2018	Cyprus	Not stated	EuroGASP2018	PRJEB34068	ERR9837542	SAMEA5958419	No data	S	No data	I	0.125	S	0.023	S	0.006	S	0.002	S	No data	I	new	58	29	1580	126	39	67	111	148	153	133	3568	2.001	15	100	100	100	100	100	-	-	-	-	-	rpsJ_V57M	-	-	-
ECDC_CZ18_001	2018	Czech Republic	Not stated	EuroGASP2018	PRJEB34068	ERR9837417	SAMEA5959443	No data	S	No data	I	3	R	<0,016	S	0.003	S	12	R	No data	I	12302	908	267	9363	126	39	67	238	148	153	133	168	2.001	39	11	100	7	4	100	-	-	-	-	-	rpsJ_V57M	-	porB1b_G120K	-
ECDC_CZ18_003	2018	Czech Republic	Not stated	EuroGASP2018	PRJEB34068	ERR9837995	SAMEA5959460	No data	S	No data	I	3	R	<0,016	S	0.004	S	8	R	No data	I	12302	908	267	9363	126	39	67	238	148	153	133	168	2.001	39	11	100	7	4	100	-	-	-	-	-	rpsJ_V57M	-	porB1b_G120K	-
ECDC_CZ18_004	2018	Czech Republic	Not stated	EuroGASP2018	PRJEB34068	ERR9837421	SAMEA5959469	No data	S	No data	I	2	R	<0,016	S	0.006	S	12	R	No data	I	12302	908	267	9363	126	39	67	238	148	153	133	168	2.001	39	11	100	7	4	100	-	-	-	-	-	rpsJ_V57M	-	porB1b_G120K	-
ECDC_CZ18_005	2018	Czech Republic	Not stated	EuroGASP2018	PRJEB34068	ERR9837998	SAMEA5959479	No data	S	No data	I	2	R	<0,016	I	0.003	R	8	R	No data	I	12302	908	267	9363	126	39	67	238	148	153	133	168	2.001	39	11	100	7	4	100	-	-	-	-	-	rpsJ_V57M	-	porB1b_G120K	-
ECDC_CZ18_006	2018	Czech Republic	Not stated	EuroGASP2018	PRJEB34068	ERR9837425	SAMEA5959492	No data	S	No data	R	0.5	S	0.047	S	0.064	S	8	R	No data	R	new	new	4	7827	59	39	67	158	148	153	65	38	13.001	19	8	1	1	9	100	-	-	-	-	-	rpsJ_V57M	-	porB1b_G120K	porB1b_A121D
ECDC_CZ18_007	2018	Czech Republic	Not stated	EuroGASP2018	PRJEB34068	ERR9837429	SAMEA5959503	No data	S	No data	I	2	R	<0,016	S	0.004	S	8	R	No data	I	15252	2147	267	9363	126	39	67	238	148	153	133	168	2.001	39	11	100	7	4	100	-	-	-	-	-	rpsJ_V57M	-	porB1b_G120K	-
ECDC_CZ18_008	2018	Czech Republic	Not stated	EuroGASP2018	PRJEB34068	ERR9837433	SAMEA5959513	No data	S	No data	I	2	R	<0,016	S	0.003	S	16	R	No data	I	12302	908	267	9363	126	39	67	238	148	153	133	168	2.001	39	11	100	7	4	100	-	-	-	-	-	rpsJ_V57M	-	porB1b_G120K	-
ECDC_CZ18_012	2018	Czech Republic	Not stated	EuroGASP2018	PRJEB34068	ERR9837442	SAMEA5785206	No data	S	No data	R	0.5	S	0.032	S	0.016	S	12	R	No data	R	new	new	4	7827	59	39	67	158	148	153	65	38	13.001	19	8	1	1	9	100	-	-	-	-	-	rpsJ_V57M	-	porB1b_G120K	porB1b_A121D
ECDC_CZ18_013	2018	Czech Republic	Not stated	EuroGASP2018	PRJEB34068	ERR9837446	SAMEA5785207	No data	S	No data	R	0.75	S	0.064	S	0.094	S	>32	R	No data	R	new	new	4	7827	59	39	67	158	148	153	65	38	13.001	19	8	1	1	9	100	-	-	-	-	-	rpsJ_V57M	-	porB1b_G120K	porB1b_A121D
ECDC_CZ18_014	2018	Czech Republic	Not stated	EuroGASP2018	PRJEB34068	ERR9837450	SAMEA5785208	No data	S	No data	I	2	R	<0,016	S	0.002	S	16	R	No data	I	12302	908	267	9363	126	39	67	238	148	153	133	168	2.001	39	11	100	7	4	100	-	-	-	-	-	rpsJ_V57M	-	porB1b_G120K	-
ECDC_CZ18_015	2018	Czech Republic	Not stated	EuroGASP2018	PRJEB34068	ERR9837454	SAMEA5959554	No data	S	No data	R	0.125	S	<0,016	S	0.004	S	4	R	No data	I	new	251	new	12974	59	39	67	158	148	154	65	3680	19.001	225	13	1	7	26	100	-	-	-	-	tetM	rpsJ_V57M	-	-	-
ECDC_CZ18_026	2018	Czech Republic	Not stated	EuroGASP2018	PRJEB34068	ERR9837492	SAMEA5959662	No data	S	No data	R	0.38	S	0.047	S	0.032	S	4	R	No data	R	10386	246	4	7827	59	39	67	158	148	153	65	38	13.001	19	8	1	1	9	100	-	-	-	-	-	rpsJ_V57M	-	porB1b_G120K	porB1b_A121D
ECDC_CZ18_027	2018	Czech Republic	Not stated	EuroGASP2018	PRJEB34068	ERR9837499	SAMEA5959672	No data	S	No data	I	0.5	S	<0,016	S	0.002	S	0.003	S	No data	I	15001	208	29	8134	126	39	67	157	148	153	133	63	2.001	9	1	100	100	100	100	-	-	-	-	-	rpsJ_V57M	-	-	-
ECDC_CZ18_037	2018	Czech Republic	Not stated	EuroGASP2018	PRJEB34068	ERR9837536	SAMEA5959785	No data	S	No data	I	0.38	S	<0,016	S	0.004	S	0.003	S	No data	I	new	61	39	9363	126	39	67	238	148	153	133	1278	2.001	101	100	100	100	100	12	-	-	-	-	-	rpsJ_V57M	-	-	-
ECDC_CZ18_038	2018	Czech Republic	Not stated	EuroGASP2018	PRJEB34068	ERR9837540	SAMEA5959796	No data	S	No data	I	0.38	S	<0,016	S	0.004	S	0.004	S	No data	I	new	61	39	9363	126	39	67	238	148	153	133	1278	2.001	101	100	100	100	100	12	-	-	-	-	-	rpsJ_V57M	-	-	-
ECDC_CZ18_048	2018	Czech Republic	Not stated	EuroGASP2018	PRJEB34068	ERR9837572	SAMEA5959859	No data	S	No data	R	0.094	S	<0,016	S	0.004	S	1	R	No data	R	new	640	602	7363	59	39	67	78	148	153	65	719	2.002	89	100	100	7	4	100	-	-	-	blaTEM	tetM	rpsJ_V57M	-	-	-
ECDC_CZ18_049	2018	Czech Republic	Not stated	EuroGASP2018	PRJEB34068	ERR9837576	SAMEA5959870	No data	S	No data	I	0.75	S	<0,016	S	0.006	S	0.004	S	No data	I	9208	1808	18	13292	126	39	785	156	148	153	133	439	2.001	9	1	100	100	1	100	-	-	-	-	-	rpsJ_V57M	-	-	-
ECDC_CZ18_051	2018	Czech Republic	Not stated	EuroGASP2018	PRJEB34068	ERR9838006	SAMEA5959890	No data	S	No data	I	2	R	<0,016	S	0.012	S	0.023	S	No data	I	new	new	29	9363	126	39	67	238	148	153	133	3573	2.001	39	12	100	100	100	100	-	-	-	-	-	rpsJ_V57M	-	porB1b_G120K	-
ECDC_CZ18_054	2018	Czech Republic	Not stated	EuroGASP2018	PRJEB34068	ERR9837589	SAMEA5959921	No data	S	No data	I	0.5	S	<0,016	S	0.003	S	0.004	S	No data	I	9208	1808	18	13292	126	39	785	156	148	153	133	439	2.001	9	1	100	100	1	100	-	-	-	-	-	rpsJ_V57M	-	-	-
ECDC_CZ18_058	2018	Czech Republic	Not stated	EuroGASP2018	PRJEB34068	ERR9837703	SAMEA5959959	No data	S	No data	I	2	R	<0,016	S	0.006	S	12	R	No data	I	14076	2043	267	9363	126	39	67	238	148	153	133	168	2.001	39	11	100	7	4	100	-	-	-	-	-	rpsJ_V57M	-	porB1b_G120K	-
ECDC_CZ18_059	2018	Czech Republic	Not stated	EuroGASP2018	PRJEB34068	ERR9837705	SAMEA5959967	No data	S	No data	R	0.38	S	0.064	S	0.094	S	12	R	No data	R	10386	246	4	7827	59	39	67	158	148	153	65	38	13.001	19	8	1	1	9	100	-	-	-	-	-	rpsJ_V57M	-	porB1b_G120K	porB1b_A121D
ECDC_CZ18_060	2018	Czech Republic	Not stated	EuroGASP2018	PRJEB34068	ERR9838021	SAMEA5959975	No data	S	No data	I	0.5	S	<0,016	S	0.004	S	0.004	S	No data	I	9208	1808	18	13292	126	39	785	156	148	153	133	439	2.001	9	1	100	100	1	100	-	-	-	-	-	rpsJ_V57M	-	-	-
ECDC_CZ18_081	2018	Czech Republic	Not stated	EuroGASP2018	PRJEB34068	ERR9838049	SAMEA5960140	No data	S	No data	R	0.25	S	0.094	S	0.064	S	8	R	No data	R	10386	246	4	7827	59	39	67	158	148	153	65	38	13.001	19	8	1	1	9	100	-	-	-	-	-	rpsJ_V57M	-	porB1b_G120K	porB1b_A121D
ECDC_CZ18_083	2018	Czech Republic	Not stated	EuroGASP2018	PRJEB34068	ERR9838052	SAMEA5960161	No data	S	No data	I	0.5	S	<0,016	S	0.002	S	0.006	S	No data	I	9208	1808	18	13292	126	39	785	156	148	153	133	439	2.001	9	1	100	100	1	100	-	-	-	-	-	rpsJ_V57M	-	-	-
ECDC_DK13_458	2013	Denmark	DK13_458	EuroGASP2013	PRJEB9227	ERR1528328	SAMEA3431797	No data	S	No data	R	0.25	S	0.094	S	0.016	S	32	R	No data	R	6974	908	137	1588	59	39	67	158	148	71	65	874	19.001	38	11	1	7	55	100	-	-	-	blaTEM	tetM	rpsJ_V57M	-	porB1b_G120K	-
ECDC_DK13_460	2013	Denmark	DK13_460	EuroGASP2013	PRJEB9227	ERR1528330	SAMEA3431801	No data	S	No data	I	0.25	S	0.023	S	0.004	S	2	R	No data	R	5624	90	953	8143	59	39	170	78	146	154	65	426	2.002	40	13	100	7	4	100	-	-	-	blaTEM	-	rpsJ_V57M	-	-	-
ECDC_DK13_461	2013	Denmark	DK13_461	EuroGASP2013	PRJEB9227	ERR1514838	SAMEA3431982	No data	S	No data	R	0.125	S	0.047	S	0.006	S	0.004	S	No data	I	2	2	16	11975	59	39	762	111	188	71	223	84	22.001	15	100	100	100	7	100	-	-	-	-	tetM	rpsJ_V57M	-	-	-
ECDC_DK13_462	2013	Denmark	DK13_462	EuroGASP2013	PRJEB9227	ERR1528331	SAMEA3431803	No data	S	No data	I	0.19	S	0.047	S	0.006	S	0.002	S	No data	I	995	28	29	1580	126	39	67	111	148	153	133	245	2.001	9	3	1	100	100	100	-	-	-	-	-	rpsJ_V57M	-	-	-
ECDC_DK13_463	2013	Denmark	DK13_463	EuroGASP2013	PRJEB9227	ERR1528332	SAMEA3431806	No data	S	No data	I	0.38	S	0.016	S	0.002	S	0.004	S	No data	I	7674	2777	29	11428	126	39	170	238	734	153	133	new	2.001	9	1	100	100	100	new	-	-	-	-	-	rpsJ_V57M	-	-	-
ECDC_DK13_464	2013	Denmark	DK13_464	EuroGASP2013	PRJEB9227	ERR1528333	SAMEA3431808	No data	S	No data	R	0.047	S	0.064	S	0.006	S	2	R	No data	I	13299	6429	137	1921	59	39	67	111	148	71	65	879	19.001	139	100	1	7	3	100	-	-	-	-	tetM	rpsJ_V57M	-	-	-
ECDC_DK13_472	2013	Denmark	DK13_472	EuroGASP2013	PRJEB9227	ERR1528155	SAMEA3431822	No data	S	No data	R	0.047	S	0.016	S	0.002	S	3	R	No data	R	11028	6432	98	11998	59	524	67	190	148	154	65	892	2.002	18	100	1	1	18	100	-	-	-	blaTEM	tetM	rpsJ_V57M	-	-	-
ECDC_DK13_473	2013	Denmark	DK13_473	EuroGASP2013	PRJEB9227	ERR1528156	SAMEA3431825	No data	S	No data	R	0.125	S	0.064	S	0.006	S	0.5	R	No data	I	4530	2758	60	7823	435	39	170	111	148	153	65	847	1.001	1	14	1	7	2	100	-	-	-	-	tetM	-	-	-	-
ECDC_DK13_477	2013	Denmark	DK13_477	EuroGASP2013	PRJEB9227	ERR1528159	SAMEA3431830	No data	S	No data	R	0.19	S	0.064	S	0.008	S	0.5	R	No data	I	9171	888	743	1588	59	39	67	158	148	71	65	53	19.001	38	1	1	7	15	100	-	-	-	-	tetM	rpsJ_V57M	-	-	-
ECDC_DK13_485	2013	Denmark	DK13_485	EuroGASP2013	PRJEB9227	ERR1528162	SAMEA3431837	No data	S	No data	I	0.25	S	0.016	S	0.002	S	0.003	S	No data	I	2992	1808	29	9363	126	39	67	238	148	153	133	new	2.001	9	1	100	100	100	new	-	-	-	-	-	rpsJ_V57M	-	-	-
ECDC_DK13_486	2013	Denmark	DK13_486	EuroGASP2013	PRJEB9227	ERR1528163	SAMEA3431839	No data	S	No data	R	0.047	S	0.002	S	0.004	S	3	R	No data	I	13299	6429	137	1921	59	39	67	111	148	71	65	879	19.001	139	100	1	7	3	100	-	-	-	-	tetM	rpsJ_V57M	-	-	-
ECDC_DK13_487	2013	Denmark	DK13_487	EuroGASP2013	PRJEB9227	ERR1528164	SAMEA3431841	No data	S	No data	I	0.38	S	0.016	S	0.002	S	0.004	S	No data	I	2992	1808	29	9363	126	39	67	238	148	153	133	new	2.001	9	1	100	100	100	new	-	-	-	-	-	rpsJ_V57M	-	-	-
ECDC_DK13_489	2013	Denmark	DK13_489	EuroGASP2013	PRJEB9227	ERR1528166	SAMEA3431845	No data	S	No data	I	0.5	S	0.016	S	0.002	S	0.004	S	No data	I	2992	1808	29	9362	126	39	67	238	147	153	133	63	2.001	9	1	100	100	100	100	-	-	-	-	-	rpsJ_V57M	-	-	-
ECDC_DK13_496	2013	Denmark	DK13_496	EuroGASP2013	PRJEB9227	ERR1528173	SAMEA3431859	No data	S	No data	R	0.023	S	0.016	S	0.003	S	0.75	R	No data	I	9171	888	743	1588	59	39	67	158	148	71	65	new	19.001	38	1	1	7	15	new	-	-	-	-	tetM	rpsJ_V57M	-	-	-
ECDC_DK13_504	2013	Denmark	DK13_504	EuroGASP2013	PRJEB9227	ERR1528179	SAMEA3431871	No data	S	No data	I	0.5	S	0.016	S	0.004	S	0.008	S	No data	I	3935	908	29	9363	126	39	67	238	148	153	133	67	2.001	9	11	100	100	100	100	-	-	-	-	-	rpsJ_V57M	-	porB1b_G120K	-
ECDC_DK13_506	2013	Denmark	DK13_506	EuroGASP2013	PRJEB9227	ERR1528181	SAMEA3431875	No data	S	No data	I	0.38	S	0.016	S	0.002	S	0.004	S	No data	I	11013	3281	137	11983	126	39	67	238	734	71	133	new	2.001	9	1	100	100	100	new	-	-	-	-	-	rpsJ_V57M	-	-	-
ECDC_DK13_509	2013	Denmark	DK13_509	EuroGASP2013	PRJEB9227	ERR1528184	SAMEA3431881	No data	S	No data	I	0.064	S	0.016	S	0.004	S	2	R	No data	I	11032	6437	272	1582	59	39	170	78	148	154	65	new	2.002	54	100	100	1	22	new	-	-	-	-	-	rpsJ_V57M	-	-	-
ECDC_DK18_714	2018	Denmark	Not stated	EuroGASP2018	PRJEB34068	ERR9837561	SAMEA5958424	No data	S	No data	I	0.75	R	<0,016	S	<0,002	S	4	R	No data	I	new	new	267	14101	126	39	67	238	148	939	133	168	2.001	39	11	100	7	4	100	-	-	-	-	-	rpsJ_V57M	-	porB1b_G120K	-
ECDC_DK18_720	2018	Denmark	Not stated	EuroGASP2018	PRJEB34068	ERR9837580	SAMEA5958430	No data	S	No data	I	0.032	S	<0,016	S	0.002	S	1	R	No data	I	11461	6720	188	8143	59	39	170	78	146	154	65	1938	2.002	40	3	100	7	4	100	-	-	-	-	-	rpsJ_V57M	-	-	-
ECDC_DK18_722	2018	Denmark	Not stated	EuroGASP2018	PRJEB34068	ERR9837584	SAMEA5958431	No data	S	No data	R	0.19	S	<0,016	S	<0,002	S	0.002	S	No data	I	new	6389	953	11423	126	142	67	238	150	153	65	2973	2.002	1	100	1	100	2	100	-	-	-	-	-	rpsJ_V57M	-	-	-
ECDC_DK18_731	2018	Denmark	Not stated	EuroGASP2018	PRJEB34068	ERR9837613	SAMEA5785120	No data	S	No data	I	0.25	S	<0,016	S	0.002	S	1.5	R	No data	I	13476	90	188	8143	59	39	170	78	146	154	65	426	2.002	40	13	100	7	4	100	-	-	-	-	-	rpsJ_V57M	-	-	-
ECDC_DK18_734	2018	Denmark	Not stated	EuroGASP2018	PRJEB34068	ERR9837626	SAMEA5785123	No data	S	No data	I	0.75	R	<0,016	S	0.003	S	4	R	No data	I	12302	908	267	9363	126	39	67	238	148	153	133	168	2.001	39	11	100	7	4	100	-	-	-	-	-	rpsJ_V57M	-	porB1b_G120K	-
ECDC_DK18_737	2018	Denmark	Not stated	EuroGASP2018	PRJEB34068	ERR9837639	SAMEA5958442	No data	S	No data	R	0.094	S	<0,016	S	0.008	S	8	R	No data	R	9524	1489	137	1588	59	39	67	158	148	71	65	3670	19.001	38	10	1	7	55	100	-	-	-	blaTEM	tetM	rpsJ_V57M	-	porB1b_G120K	porB1b_A121D
ECDC_DK18_738	2018	Denmark	Not stated	EuroGASP2018	PRJEB34068	ERR9837281	SAMEA5958443	No data	S	No data	R	0.094	S	<0,016	S	0.004	S	0.38	R	No data	R	15589	7738	1971	1583	59	39	67	111	148	153	65	1340	43.002	122	100	100	7	6	100	-	-	-	blaTEM	tetM	rpsJ_V57M	-	-	-
ECDC_DK18_739	2018	Denmark	Not stated	EuroGASP2018	PRJEB34068	ERR9837642	SAMEA5958444	No data	S	No data	I	1	R	<0,016	S	0.002	S	1	R	No data	I	new	new	267	9363	126	39	67	238	148	153	133	1487	2.001	39	1	100	7	4	100	-	-	-	-	-	rpsJ_V57M	-	-	-
ECDC_DK18_742	2018	Denmark	Not stated	EuroGASP2018	PRJEB34068	ERR9837797	SAMEA5958447	No data	S	No data	R	0.25	S	<0,016	S	0.002	S	0.002	S	No data	I	8437	2600	18	1584	59	39	67	156	150	153	65	432	14.001	1	1	1	100	2	100	-	-	-	-	-	rpsJ_V57M	-	-	-
ECDC_DK18_743	2018	Denmark	Not stated	EuroGASP2018	PRJEB34068	ERR9837801	SAMEA5958448	No data	S	No data	R	0.047	S	<0,016	S	0.003	S	3	R	No data	R	12791	1923	191	14422	59	39	170	158	148	153	65	3359	12.001	173	3	1	7	150	100	-	-	-	blaTEM	tetM	rpsJ_V57M	-	-	-
ECDC_DK18_748	2018	Denmark	Not stated	EuroGASP2018	PRJEB34068	ERR9837285	SAMEA5958453	No data	S	No data	I	0.19	S	<0,016	S	<0,002	S	0.002	S	No data	I	9208	1808	18	13292	126	39	785	156	148	153	133	439	2.001	9	1	100	100	1	100	-	-	-	-	-	rpsJ_V57M	-	-	-
ECDC_DK18_755	2018	Denmark	Not stated	EuroGASP2018	PRJEB34068	ERR9837289	SAMEA5958460	No data	S	No data	I	0.75	R	<0,016	S	0.002	S	0.002	S	No data	I	298	30	29	11422	109	39	67	238	148	153	133	213	2.001	39	1	100	100	100	100	-	-	-	-	-	rpsJ_V57M	-	-	-
ECDC_DK18_756	2018	Denmark	Not stated	EuroGASP2018	PRJEB34068	ERR9838814	SAMEA5958461	No data	S	No data	I	1	R	<0,016	S	0.002	S	8	R	No data	I	12302	908	267	9363	126	39	67	238	148	153	133	168	2.001	39	11	100	7	4	100	-	-	-	-	-	rpsJ_V57M	-	porB1b_G120K	-
ECDC_DK18_758	2018	Denmark	Not stated	EuroGASP2018	PRJEB34068	ERR9837291	SAMEA5958463	No data	S	No data	I	0.094	S	<0,016	S	0.004	S	0.002	S	No data	I	new	new	16	11975	59	39	762	111	188	71	223	84	22.001	15	100	100	100	7	100	-	-	-	-	-	rpsJ_V57M	-	-	-
ECDC_DK18_761	2018	Denmark	Not stated	EuroGASP2018	PRJEB34068	ERR9838830	SAMEA5958466	No data	S	No data	R	0.047	S	<0,016	S	0.002	S	1	R	No data	R	new	new	602	1587	59	39	67	78	148	153	133	719	2.002	89	100	100	7	4	100	-	-	-	blaTEM	tetM	rpsJ_V57M	-	-	-
ECDC_DK18_762	2018	Denmark	Not stated	EuroGASP2018	PRJEB34068	ERR9837293	SAMEA5958467	No data	S	No data	I	1	R	<0,016	S	0.004	S	1.5	R	No data	I	new	new	267	9363	126	39	67	238	148	153	133	1487	2.001	39	1	100	7	4	100	-	-	-	-	-	rpsJ_V57M	-	-	-
ECDC_DK18_763	2018	Denmark	Not stated	EuroGASP2018	PRJEB34068	ERR9837139	SAMEA5958468	No data	S	No data	I	0.125	S	<0,016	S	0.004	S	0.38	R	No data	I	new	161	new	1588	59	39	67	158	148	71	65	271	19.001	47	14	1	7	17	100	-	-	-	-	-	rpsJ_V57M	-	-	-
ECDC_DK18_764	2018	Denmark	Not stated	EuroGASP2018	PRJEB34068	ERR9838834	SAMEA5958469	No data	S	No data	R	0.125	S	0.016	S	0.008	S	0.38	R	No data	R	new	new	1971	1583	59	39	67	111	148	153	65	1340	43.002	122	100	100	7	6	100	-	-	-	blaTEM	tetM	rpsJ_V57M	-	-	-
ECDC_DK18_768	2018	Denmark	Not stated	EuroGASP2018	PRJEB34068	ERR9837140	SAMEA5958480	No data	S	No data	I	0.094	S	0.016	S	0.003	S	0.38	R	No data	I	new	161	new	1588	59	39	67	158	148	71	65	3682	19.015	47	14	1	7	17	100	-	-	-	-	-	rpsJ_V57M	-	-	-
ECDC_DK18_769	2018	Denmark	Not stated	EuroGASP2018	PRJEB34068	ERR9838845	SAMEA5958481	No data	S	No data	R	0.047	S	<0,016	S	0.002	S	0.75	R	No data	R	new	new	602	1587	59	39	67	78	148	153	133	719	2.002	89	100	100	7	4	100	-	-	-	blaTEM	tetM	rpsJ_V57M	-	-	-
ECDC_DK18_770	2018	Denmark	Not stated	EuroGASP2018	PRJEB34068	ERR9838849	SAMEA5958482	No data	S	No data	R	0.047	S	<0,016	S	<0,002	S	0.75	R	No data	R	new	new	602	1587	59	39	67	78	148	153	133	719	2.002	89	100	100	7	4	100	-	-	-	blaTEM	tetM	rpsJ_V57M	-	-	-
ECDC_DK18_775	2018	Denmark	Not stated	EuroGASP2018	PRJEB34068	ERR9837141	SAMEA5785124	No data	S	No data	I	0.047	S	<0,016	S	0.002	S	0.002	S	No data	I	13571	7834	16	11975	59	39	762	111	188	71	223	84	22.001	15	100	100	100	7	100	-	-	-	-	-	rpsJ_V57M	-	-	-
ECDC_DK18_777	2018	Denmark	Not stated	EuroGASP2018	PRJEB34068	ERR9838872	SAMEA5785125	No data	S	No data	R	0.125	S	0.047	R	0.006	S	1	R	No data	R	12554	6810	953	7363	59	39	67	78	148	153	65	3691	34.026	284	100	100	7	9	100	-	-	-	blaTEM	tetM	rpsJ_V57M	-	-	-
ECDC_DK18_783	2018	Denmark	Not stated	EuroGASP2018	PRJEB34068	ERR9838890	SAMEA5958473	No data	S	No data	I	0.125	S	<0,016	S	0.002	S	1	R	No data	I	13476	90	188	8143	59	39	170	78	146	154	65	426	2.002	40	13	100	7	4	100	-	-	-	-	-	rpsJ_V57M	-	-	-
ECDC_DK18_785	2018	Denmark	Not stated	EuroGASP2018	PRJEB34068	ERR9838896	SAMEA5958475	No data	S	No data	I	0.064	S	<0,016	S	0.003	S	0.38	R	No data	I	new	161	new	1588	59	39	67	158	148	71	65	271	19.001	47	14	1	7	17	100	-	-	-	-	-	rpsJ_V57M	-	-	-
ECDC_DK18_792	2018	Denmark	Not stated	EuroGASP2018	PRJEB34068	ERR9837142	SAMEA5958490	No data	S	No data	I	0.75	R	<0,016	S	0.002	S	4	R	No data	I	12302	908	267	9363	126	39	67	238	148	153	133	168	2.001	39	11	100	7	4	100	-	-	-	-	-	rpsJ_V57M	-	porB1b_G120K	-
ECDC_DK18_793	2018	Denmark	Not stated	EuroGASP2018	PRJEB34068	ERR9838918	SAMEA5958491	No data	S	No data	I	0.5	R	<0,016	S	<0,002	S	1	R	No data	I	14698	8567	267	9363	126	39	67	238	148	153	133	1040	2.001	39	31	100	7	4	100	-	-	-	-	-	rpsJ_V57M	-	-	-
ECDC_DK18_796	2018	Denmark	Not stated	EuroGASP2018	PRJEB34068	ERR9838985	SAMEA5958494	No data	S	No data	I	0.19	S	<0,016	S	0.002	S	1	R	No data	I	13476	90	188	8143	59	39	170	78	146	154	65	426	2.002	40	13	100	7	4	100	-	-	-	-	-	rpsJ_V57M	-	-	-
ECDC_DK18_800	2018	Denmark	Not stated	EuroGASP2018	PRJEB34068	ERR9838993	SAMEA5958496	No data	S	No data	I	0.064	S	<0,016	S	0.002	S	0.5	R	No data	I	new	161	new	1588	59	39	67	158	148	71	65	271	19.001	47	14	1	7	17	100	-	-	-	-	-	rpsJ_V57M	-	-	-
ECDC_DK18_804	2018	Denmark	Not stated	EuroGASP2018	PRJEB34068	ERR9839010	SAMEA5958500	No data	S	No data	R	0.047	S	<0,016	S	0.002	S	1	R	No data	R	new	new	2056	1587	59	39	67	78	148	153	133	1204	2.002	89	12	100	7	4	100	-	-	-	blaTEM	tetM	rpsJ_V57M	-	porB1b_G120K	-
ECDC_DK18_808	2018	Denmark	Not stated	EuroGASP2018	PRJEB34068	ERR9839022	SAMEA5958503	No data	S	No data	R	0.125	S	<0,016	S	0.008	S	12	R	No data	R	9524	1489	137	1588	59	39	67	158	148	71	65	3670	19.001	38	10	1	7	55	100	-	-	-	blaTEM	tetM	rpsJ_V57M	-	porB1b_G120K	porB1b_A121D
ECDC_DK18_809	2018	Denmark	Not stated	EuroGASP2018	PRJEB34068	ERR9837143	SAMEA5958504	No data	S	No data	I	0.064	S	<0,016	S	0.002	S	0.002	S	No data	I	2	2	16	11975	59	39	762	111	188	71	223	84	22.001	15	100	100	100	7	100	-	-	-	-	-	rpsJ_V57M	-	-	-
ECDC_DK18_821	2018	Denmark	Not stated	EuroGASP2018	PRJEB34068	ERR9838782	SAMEA5958924	No data	S	No data	I	1	R	<0,016	S	0.002	S	0.75	R	No data	I	new	new	267	9363	126	39	67	238	148	153	133	1487	2.001	39	1	100	7	4	100	-	-	-	-	-	rpsJ_V57M	-	-	-
ECDC_EE18_001	2018	Estonia	Not stated	EuroGASP2018	PRJEB34068	ERR9837871	SAMEA5785179	No data	S	No data	I	1.5	R	<=0,016	S	<=0,016	S	32	R	No data	I	12302	908	267	9363	126	39	67	238	148	153	133	168	2.001	39	11	100	7	4	100	-	-	-	-	-	rpsJ_V57M	-	porB1b_G120K	-
ECDC_EE18_003	2018	Estonia	Not stated	EuroGASP2018	PRJEB34068	ERR9837875	SAMEA5785180	No data	S	No data	R	0.25	S	<0,016	S	<0,016	S	2	R	No data	I	new	new	10	1582	59	39	170	78	148	154	65	new	2.002	19	new	100	1	18	100	-	-	-	-	-	rpsJ_V57M	-	-	-
ECDC_ES012	2013	Spain	ES012	EuroGASP2013	PRJEB9227	ERR1469567	SAMEA3373457	No data	S	No data	I	0.25	S	0.06	S	0.015	S	0.007	S	No data	I	5961	971	29	9363	126	39	67	238	148	153	133	67	2.001	9	11	100	100	100	100	-	-	-	-	-	rpsJ_V57M	-	porB1b_G120K	-
ECDC_ES018	2013	Spain	ES018	EuroGASP2013	PRJEB9227	ERR1469571	SAMEA3373463	No data	S	No data	R	0.12	S	0.015	S	0.003	S	4	R	No data	R	7414	4444	1412	11956	59	39	67	78	149	154	65	new	69.001	54	14	100	7	20	new	-	-	-	blaTEM	tetM	rpsJ_V57M	-	-	-
ECDC_ES021	2013	Spain	ES021	EuroGASP2013	PRJEB9227	ERR1469574	SAMEA3373466	No data	S	No data	I	0.5	S	0.03	S	0.015	S	0.007	S	No data	I	5961	971	29	9363	126	39	67	238	148	153	133	67	2.001	9	11	100	100	100	100	-	-	-	-	-	rpsJ_V57M	-	porB1b_G120K	-
ECDC_ES033	2013	Spain	ES033	EuroGASP2013	PRJEB9227	ERR1469583	SAMEA3373478	No data	S	No data	I	0.5	S	0.03	S	0.015	S	0.007	S	No data	I	2992	1808	29	11428	126	39	170	238	734	153	133	63	2.001	9	1	100	100	100	100	-	-	-	-	-	rpsJ_V57M	-	-	-
ECDC_ES040	2013	Spain	ES040	EuroGASP2013	PRJEB9227	ERR1469588	SAMEA3373485	No data	S	No data	R	0.25	S	0.06	S	0.06	S	8	R	No data	R	2142	997	522	1588	59	39	67	158	148	71	65	new	19.001	38	11;12	1	7	15	new	-	-	-	blaTEM	tetM	rpsJ_V57M	-	porB1b_G120K	-
ECDC_ES053	2013	Spain	ES053	EuroGASP2013	PRJEB9227	ERR1560944	SAMEA3485734	No data	S	No data	I	0.25	S	0.12	S	0.06	S	0.004	S	No data	I	2	2	16	11975	59	39	762	111	188	71	223	84	22.001	15	100	100	100	7	100	-	-	-	-	-	rpsJ_V57M	-	-	-
ECDC_ES057	2013	Spain	ES057	EuroGASP2013	PRJEB9227	ERR1560948	SAMEA3485738	No data	S	No data	R	0.12	S	0.007	S	0.007	S	1	R	No data	R	9971	5878	137	1588	59	39	67	158	148	71	65	247	19.001	38	12	1	7	15	100	-	-	-	blaTEM	tetM	rpsJ_V57M	-	porB1b_G120K	-
ECDC_ES18_8228	2018	Spain	Not stated	EuroGASP2018	PRJEB34068	ERR9837396	SAMEA5958053	No data	S	No data	R	0.125	S	0.047	S	0.023	S	3	R	No data	I	28	19	4	7827	59	39	67	158	148	153	65	175	13.001	19	1	1	1	9	100	-	-	-	-	-	rpsJ_V57M	-	-	-
ECDC_ES18_8229	2018	Spain	Not stated	EuroGASP2018	PRJEB34068	ERR9837752	SAMEA5785085	No data	S	No data	I	0.047	R	<0,016	S	<0,016	S	1.5	R	No data	I	12302	908	267	9363	126	39	67	238	148	153	133	168	2.001	39	11	100	7	4	100	-	-	-	-	-	rpsJ_V57M	-	porB1b_G120K	-
ECDC_ES18_8232	2018	Spain	Not stated	EuroGASP2018	PRJEB34068	ERR9837297	SAMEA5958054	No data	S	No data	I	1.5	R	0.016	S	0.016	S	0.012	S	No data	I	new	5314	29	15573	1078	39	67	238	148	153	133	193	2.001	39	11	100	100	100	100	-	-	-	-	-	rpsJ_V57M	-	porB1b_G120K	-
ECDC_ES18_8236	2018	Spain	Not stated	EuroGASP2018	PRJEB34068	ERR9837301	SAMEA5958058	No data	S	No data	R	0.047	S	<0,016	S	<0,016	S	0.75	R	No data	I	new	new	188	1588	59	39	67	158	148	71	65	3683	19.016	47	3	1	7	17	100	-	-	-	-	tetM	rpsJ_V57M	-	-	-
ECDC_ES18_8242	2018	Spain	Not stated	EuroGASP2018	PRJEB34068	ERR9837305	SAMEA5958064	No data	S	No data	I	0.023	R	<0,016	S	0.016	S	0.75	R	No data	I	15702	9181	29	9363	126	39	67	238	148	153	133	168	2.001	39	11	100	7	4	100	-	-	-	-	-	rpsJ_V57M	-	porB1b_G120K	-
ECDC_ES18_8244	2018	Spain	Not stated	EuroGASP2018	PRJEB34068	ERR9837307	SAMEA5958066	No data	S	No data	I	0.38	S	0.016	S	<0,016	S	0.003	S	No data	I	9208	1808	18	13292	126	39	785	156	148	153	133	439	2.001	9	1	100	100	1	100	-	-	-	-	-	rpsJ_V57M	-	-	-
ECDC_ES18_8253	2018	Spain	Not stated	EuroGASP2018	PRJEB34068	ERR9837761	SAMEA5958075	No data	S	No data	I	0.19	S	0.016	S	<0,016	S	0.002	S	No data	I	9208	1808	18	13292	126	39	785	156	148	153	133	439	2.001	9	1	100	100	1	100	-	-	-	-	-	rpsJ_V57M	-	-	-
ECDC_ES18_8254	2018	Spain	Not stated	EuroGASP2018	PRJEB34068	ERR9837316	SAMEA5958076	No data	S	No data	I	1	R	0.016	S	0.023	S	0.008	S	No data	I	new	5314	29	15573	1078	39	67	238	148	153	133	193	2.001	39	11	100	100	100	100	-	-	-	-	-	rpsJ_V57M	-	porB1b_G120K	-
ECDC_ES18_8255	2018	Spain	Not stated	EuroGASP2018	PRJEB34068	ERR9837317	SAMEA5958077	No data	S	No data	R	0.125	S	0.094	S	0.032	S	0.75	R	No data	R	new	6720	1971	1583	59	39	67	111	148	153	65	2875	43.002	122	3	100	7	6	100	-	-	-	blaTEM	tetM	rpsJ_V57M	-	-	-
ECDC_ES18_8267	2018	Spain	Not stated	EuroGASP2018	PRJEB34068	ERR9837405	SAMEA5785090	No data	S	No data	R	0.094	S	0.047	S	0.064	S	16	R	No data	R	new	new	4	7827	59	39	67	158	148	153	65	38	13.001	19	8	1	1	9	100	-	-	-	-	-	rpsJ_V57M	-	porB1b_G120K	porB1b_A121D
ECDC_ES18_8270	2018	Spain	Not stated	EuroGASP2018	PRJEB34068	ERR9837323	SAMEA5958088	No data	S	No data	R	0.125	S	0.064	S	0.094	S	24	R	No data	R	10386	246	4	7827	59	39	67	158	148	153	65	38	13.001	19	8	1	1	9	100	-	-	-	-	-	rpsJ_V57M	-	porB1b_G120K	porB1b_A121D
ECDC_ES18_8272	2018	Spain	Not stated	EuroGASP2018	PRJEB34068	ERR9837791	SAMEA5958090	No data	S	No data	I	0.064	S	0.016	S	<0,016	S	1.5	R	No data	R	new	5902	137	1588	59	39	67	158	148	71	65	1369	19.001	24	3	1	7	15	100	-	-	-	blaTEM	-	rpsJ_V57M	-	-	-
ECDC_ES18_8275	2018	Spain	Not stated	EuroGASP2018	PRJEB34068	ERR9837324	SAMEA5958092	No data	S	No data	I	0.19	S	<0,016	S	<0,016	S	0.003	S	No data	I	new	new	22	11428	126	39	170	238	734	153	133	959	9.001	25	1	100	100	100	100	-	-	-	-	-	rpsJ_V57M	-	-	-
ECDC_ES18_8283	2018	Spain	Not stated	EuroGASP2018	PRJEB34068	ERR9837328	SAMEA5958100	No data	S	No data	I	0.19	S	<0,016	S	<0,016	S	2	R	No data	R	new	new	953	13266	59	39	170	78	146	530	65	427	2.002	40	100	100	7	4	100	-	-	-	blaTEM	-	rpsJ_V57M	-	-	-
ECDC_ES18_8284	2018	Spain	Not stated	EuroGASP2018	PRJEB34068	ERR9837329	SAMEA5958101	No data	S	No data	I	48	R	0.023	S	0.023	S	>32	R	No data	I	new	4993	267	9363	126	39	67	238	148	153	133	1039	2.001	39	11	100	7	4	2	-	-	23S_rDNA_c2597t	-	-	rpsJ_V57M	-	porB1b_G120K	-
ECDC_ES18_8290	2018	Spain	Not stated	EuroGASP2018	PRJEB34068	ERR9837434	SAMEA5958107	No data	S	No data	R	0.094	S	0.064	S	0.047	S	>32	R	No data	R	new	new	4	7827	59	39	67	158	148	153	65	38	13.001	19	8	1	1	9	100	-	-	-	-	-	rpsJ_V57M	-	porB1b_G120K	porB1b_A121D
ECDC_ES18_8294	2018	Spain	Not stated	EuroGASP2018	PRJEB34068	ERR9837443	SAMEA5958111	No data	S	No data	R	0.125	S	0.047	S	0.047	S	12	R	No data	R	10386	246	4	7827	59	39	67	158	148	153	65	new	13.001	19	8	1	1	9	new	-	-	-	-	-	rpsJ_V57M	-	porB1b_G120K	porB1b_A121D
ECDC_ES18_8295	2018	Spain	Not stated	EuroGASP2018	PRJEB34068	ERR9837335	SAMEA5958112	No data	S	No data	I	1.5	R	0.032	S	0.023	S	0.012	S	No data	I	6765	2078	29	9363	126	39	67	238	148	153	133	193	2.001	39	11	100	100	100	100	-	-	-	-	-	rpsJ_V57M	-	porB1b_G120K	-
ECDC_ES18_8298	2018	Spain	Not stated	EuroGASP2018	PRJEB34068	ERR9837447	SAMEA5958113	No data	S	No data	I	0.125	S	<0,016	S	<0,016	S	1.5	R	No data	R	new	new	953	13266	59	39	170	78	146	530	65	427	2.002	40	100	100	7	4	100	-	-	-	blaTEM	-	rpsJ_V57M	-	-	-
ECDC_ES18_8302	2018	Spain	Not stated	EuroGASP2018	PRJEB34068	ERR9837451	SAMEA5958114	No data	S	No data	R	0.125	S	0.064	S	0.032	S	3	R	No data	I	new	new	33	7827	59	39	67	158	148	153	65	1329	13.001	19	100	1	1	9	100	-	-	-	-	-	rpsJ_V57M	-	-	-
ECDC_ES18_8303	2018	Spain	Not stated	EuroGASP2018	PRJEB34068	ERR9837455	SAMEA5958115	No data	S	No data	I	0.125	S	0.032	S	0.016	S	0.002	S	No data	I	359	301	29	8126	126	39	67	78	148	153	133	987	66.001	25	3	100	100	100	18	-	-	-	-	-	rpsJ_V57M	-	-	-
ECDC_ES18_8306	2018	Spain	Not stated	EuroGASP2018	PRJEB34068	ERR9837336	SAMEA5958118	No data	S	No data	I	0.032	R	0.016	S	<0,016	S	1.5	R	No data	I	15702	9181	29	9363	126	39	67	238	148	153	133	168	2.001	39	11	100	7	4	100	-	-	-	-	-	rpsJ_V57M	-	porB1b_G120K	-
ECDC_ES18_8307	2018	Spain	Not stated	EuroGASP2018	PRJEB34068	ERR9837337	SAMEA5958119	No data	S	No data	I	3	R	0.016	S	<0,016	S	0.002	S	No data	I	new	new	29	1580	126	39	67	111	148	153	133	1038	93.001	25	3	100	100	100	2	-	-	23S_rDNA_c2597t	-	-	rpsJ_V57M	-	-	-
ECDC_ES18_8310	2018	Spain	Not stated	EuroGASP2018	PRJEB34068	ERR9837339	SAMEA5785093	No data	S	No data	R	0.023	S	<0,016	S	<0,016	S	4	R	No data	R	6696	997	60	1588	59	39	67	158	148	71	65	567	19.001	38	12	1	7	26	100	-	-	-	blaTEM	tetM	rpsJ_V57M	-	porB1b_G120K	-
ECDC_ES18_8311	2018	Spain	Not stated	EuroGASP2018	PRJEB34068	ERR9837471	SAMEA5785094	No data	S	No data	R	0.125	S	0.064	S	0.064	S	16	R	No data	R	14051	8111	4	7827	59	39	67	158	148	153	65	38	13.001	19	8	1	1	9	100	-	-	-	-	-	rpsJ_V57M	-	porB1b_G120K	porB1b_A121D
ECDC_ES18_8312	2018	Spain	Not stated	EuroGASP2018	PRJEB34068	ERR9837475	SAMEA5785095	No data	S	No data	I	0.19	S	<0,016	S	<0,016	S	2	R	No data	R	13966	90	85	8143	59	39	170	78	146	154	65	426	2.002	40	13	100	7	4	100	-	-	-	blaTEM	-	rpsJ_V57M	-	-	-
ECDC_ES18_8313	2018	Spain	Not stated	EuroGASP2018	PRJEB34068	ERR9837340	SAMEA5958121	No data	S	No data	R	0.032	S	<0,016	S	<0,016	S	1	R	No data	R	new	new	5	12982	59	39	67	158	148	71	133	1641	19.001	54	100	1	7	15	100	-	-	-	blaTEM	tetM	rpsJ_V57M	-	-	-
ECDC_ES18_8316	2018	Spain	Not stated	EuroGASP2018	PRJEB34068	ERR9837479	SAMEA5958124	No data	S	No data	I	1	R	0.023	S	0.023	S	0.012	S	No data	I	4822	1903	29	9363	126	39	67	238	148	153	133	193	2.001	39	11	100	100	100	100	-	-	-	-	-	rpsJ_V57M	-	porB1b_G120K	-
ECDC_ES18_8330	2018	Spain	Not stated	EuroGASP2018	PRJEB34068	ERR9837345	SAMEA5958129	No data	S	No data	I	1.5	R	0.032	S	<0,016	S	0.002	S	No data	I	470	339	29	1580	126	39	67	111	148	153	133	1038	93.001	25	3	100	100	100	2	-	-	23S_rDNA_c2597t	-	-	rpsJ_V57M	-	-	-
ECDC_ES18_8331	2018	Spain	Not stated	EuroGASP2018	PRJEB34068	ERR9837346	SAMEA5958130	No data	S	No data	I	0.5	R	<0,016	S	<0,016	S	0.002	S	No data	I	new	5136	29	15573	1078	39	67	238	148	153	133	212	2.001	39	14	100	100	100	100	-	-	-	-	-	rpsJ_V57M	-	-	-
ECDC_ES18_8337	2018	Spain	Not stated	EuroGASP2018	PRJEB34068	ERR9837352	SAMEA5958136	No data	S	No data	I	4	R	0.047	S	0.016	S	0.002	S	No data	I	new	234	29	1580	126	39	67	111	148	153	133	3709	93.001	25	21	100	100	100	2	-	-	23S_rDNA_c2597t	-	-	rpsJ_V57M	-	-	porB1b_A121D
ECDC_ES18_8347	2018	Spain	Not stated	EuroGASP2018	PRJEB34068	ERR9837498	SAMEA5958139	No data	S	No data	R	0.032	S	0.016	S	<0,016	S	0.75	R	No data	R	new	new	new	1588	59	39	67	158	148	71	65	433	19.001	47	3	1	7	17	100	-	-	-	blaTEM	tetM	rpsJ_V57M	-	-	-
ECDC_ES18_8348	2018	Spain	Not stated	EuroGASP2018	PRJEB34068	ERR9837502	SAMEA5958140	No data	S	No data	I	0.125	S	0.047	S	0.016	S	0.002	S	No data	I	359	301	29	8126	126	39	67	78	148	153	133	987	66.001	25	3	100	100	100	18	-	-	-	-	-	rpsJ_V57M	-	-	-
ECDC_ES18_8354	2018	Spain	Not stated	EuroGASP2018	PRJEB34068	ERR9837516	SAMEA5958145	No data	S	No data	R	0.094	S	0.047	S	0.047	S	8	R	No data	R	new	new	4	7827	59	39	67	158	148	153	65	38	13.001	19	8	1	1	9	100	-	-	-	-	-	rpsJ_V57M	-	porB1b_G120K	porB1b_A121D
ECDC_ES18_8358	2018	Spain	Not stated	EuroGASP2018	PRJEB34068	ERR9837521	SAMEA5958149	No data	S	No data	I	0.19	S	<0,016	S	<0,016	S	6	R	No data	R	9918	5860	953	8143	59	39	170	78	146	154	65	436	2.002	40	100	100	7	3	100	-	-	-	blaTEM	-	rpsJ_V57M	-	-	-
ECDC_ES18_8361	2018	Spain	Not stated	EuroGASP2018	PRJEB34068	ERR9837356	SAMEA5958152	No data	S	No data	I	0.125	S	0.016	S	0.016	S	8	R	No data	R	new	6912	137	1588	59	39	67	158	148	71	65	1211	19.001	24	10	1	7	15	100	-	-	-	blaTEM	-	rpsJ_V57M	-	porB1b_G120K	porB1b_A121D
ECDC_ES18_8365	2018	Spain	Not stated	EuroGASP2018	PRJEB34068	ERR9837359	SAMEA5785099	No data	S	No data	I	1	R	0.016	S	0.016	S	0.012	S	No data	I	new	new	29	15573	1078	39	67	238	148	153	133	193	2.001	39	11	100	100	100	100	-	-	-	-	-	rpsJ_V57M	-	porB1b_G120K	-
ECDC_ES18_8366	2018	Spain	Not stated	EuroGASP2018	PRJEB34068	ERR9837529	SAMEA5958153	No data	S	No data	R	0.125	S	0.064	S	0.064	S	8	R	No data	R	10386	246	4	7827	59	39	67	158	148	153	65	38	13.001	19	8	1	1	9	100	-	-	-	-	-	rpsJ_V57M	-	porB1b_G120K	porB1b_A121D
ECDC_ES18_8374	2018	Spain	Not stated	EuroGASP2018	PRJEB34068	ERR9837549	SAMEA5958162	No data	S	No data	I	1.5	R	<0,016	S	<0,016	S	0.008	S	No data	I	new	new	29	9363	126	39	67	238	148	153	133	193	2.001	39	11	100	100	100	100	-	-	-	-	-	rpsJ_V57M	-	porB1b_G120K	-
ECDC_ES18_8376	2018	Spain	Not stated	EuroGASP2018	PRJEB34068	ERR9837556	SAMEA5958164	No data	S	No data	I	0.38	S	0.016	S	<0,016	S	0.002	S	No data	I	new	new	18	new	126	39	785	156	146	153	133	439	2.001	9	1	100	100	1	100	-	-	-	-	-	rpsJ_V57M	-	-	-
ECDC_ES18_8377	2018	Spain	Not stated	EuroGASP2018	PRJEB34068	ERR9837363	SAMEA5958165	No data	S	No data	I	0.19	S	<0,016	S	<0,016	S	0.002	S	No data	I	5119	3104	29	11463	126	39	67	238	734	153	133	63	2.001	9	1	100	100	100	100	-	-	-	-	-	rpsJ_V57M	-	-	-
ECDC_ES18_8390	2018	Spain	Not stated	EuroGASP2018	PRJEB34068	ERR9837579	SAMEA5958178	No data	S	No data	R	0.25	S	0.032	S	0.016	S	1	R	No data	R	14769	55	1971	1583	59	39	67	111	148	153	65	539	43.002	122	1	100	7	6	100	-	-	-	blaTEM	tetM	rpsJ_V57M	-	-	-
ECDC_ES18_8394	2018	Spain	Not stated	EuroGASP2018	PRJEB34068	ERR9837177	SAMEA5958182	No data	S	No data	R	0.125	S	0.023	S	0.016	S	0.5	R	No data	R	15589	7738	1971	1583	59	39	67	111	148	153	65	1340	43.002	122	100	100	7	6	100	-	-	-	blaTEM	tetM	rpsJ_V57M	-	-	-
ECDC_ES18_8396	2018	Spain	Not stated	EuroGASP2018	PRJEB34068	ERR9837179	SAMEA5958184	No data	S	No data	I	0.38	S	0.016	S	<0,016	S	0.002	S	No data	I	621	90	18	16319	126	39	785	158	148	153	133	3566	2.001	9	13	100	100	1	100	-	-	-	-	-	rpsJ_V57M	-	-	-
ECDC_ES18_8401	2018	Spain	Not stated	EuroGASP2018	PRJEB34068	ERR9837184	SAMEA5785101	No data	S	No data	I	1.5	R	0.023	S	0.023	S	0.012	S	No data	I	6765	2078	29	11422	109	39	67	238	148	153	133	193	2.001	39	11	100	100	100	100	-	-	-	-	-	rpsJ_V57M	-	porB1b_G120K	-
ECDC_ES18_8409	2018	Spain	Not stated	EuroGASP2018	PRJEB34068	ERR9837606	SAMEA5958192	No data	S	No data	I	0.25	S	0.016	S	<0,016	S	0.002	S	No data	I	2992	1808	29	11864	126	39	785	238	148	153	133	439	2.001	9	1	100	100	1	100	-	-	-	-	-	rpsJ_V57M	-	-	-
ECDC_ES18_8415	2018	Spain	Not stated	EuroGASP2018	PRJEB34068	ERR9837625	SAMEA5958197	No data	S	No data	R	0.125	S	0.032	S	0.016	S	0.38	R	No data	R	15589	7738	1971	1583	59	39	67	111	148	153	65	1340	43.002	122	100	100	7	6	100	-	-	-	blaTEM	tetM	rpsJ_V57M	-	-	-
ECDC_ES18_8418	2018	Spain	Not stated	EuroGASP2018	PRJEB34068	ERR9837629	SAMEA5958200	No data	S	No data	I	0.064	S	0.032	S	0.023	S	1	R	No data	R	4375	453	137	1588	59	39	67	158	148	71	65	1369	19.001	24	3	1	7	15	100	-	-	-	blaTEM	-	rpsJ_V57M	-	-	-
ECDC_ES18_8423	2018	Spain	Not stated	EuroGASP2018	PRJEB34068	ERR9837638	SAMEA5958204	No data	S	No data	R	0.125	S	0.047	S	0.023	S	3	R	No data	I	8845	1808	4	7827	59	39	67	158	148	153	65	175	13.001	19	1	1	1	9	100	-	-	-	-	-	rpsJ_V57M	-	-	-
ECDC_ES18_8425	2018	Spain	Not stated	EuroGASP2018	PRJEB34068	ERR9837201	SAMEA5958205	No data	S	No data	I	0.38	S	<0,016	S	<0,016	S	0.002	S	No data	I	2992	1808	29	11864	126	39	785	238	148	153	133	439	2.001	9	1	100	100	1	100	-	-	-	-	-	rpsJ_V57M	-	-	-
ECDC_ES18_8428	2018	Spain	Not stated	EuroGASP2018	PRJEB34068	ERR9837641	SAMEA5958207	No data	S	No data	I	2	R	0.023	S	0.032	S	>32	R	No data	I	12302	908	267	9363	126	39	67	238	148	153	133	168	2.001	39	11	100	7	4	100	-	-	-	-	-	rpsJ_V57M	-	porB1b_G120K	-
ECDC_ES18_8430	2018	Spain	Not stated	EuroGASP2018	PRJEB34068	ERR9837644	SAMEA5958209	No data	S	No data	I	0.19	S	0.032	S	0.016	S	0.003	S	No data	I	new	5507	22	11428	126	39	170	238	734	153	133	959	9.001	25	1	100	100	100	100	-	-	-	-	-	rpsJ_V57M	-	-	-
ECDC_ES18_8433	2018	Spain	Not stated	EuroGASP2018	PRJEB34068	ERR9837799	SAMEA5958211	No data	S	No data	I	1.5	R	0.016	S	0.023	S	0.012	S	No data	I	3935	908	29	9363	126	39	67	238	148	153	133	3607	2.048	39	11	100	100	100	100	-	-	-	-	-	rpsJ_V57M	-	porB1b_G120K	-
ECDC_ES18_8434	2018	Spain	Not stated	EuroGASP2018	PRJEB34068	ERR9837206	SAMEA5958212	No data	S	No data	I	0.25	S	0.023	S	0.016	S	0.003	S	No data	I	15640	2577	18	13292	126	39	785	156	148	153	133	439	2.001	9	1	100	100	1	100	-	-	-	-	-	rpsJ_V57M	-	-	-
ECDC_ES18_8435	2018	Spain	Not stated	EuroGASP2018	PRJEB34068	ERR9837803	SAMEA5958223	No data	S	No data	I	1.5	R	0.032	S	0.032	S	0.012	S	No data	I	7973	3003	29	9363	126	39	67	238	148	153	133	3607	2.048	39	11	100	100	100	100	-	-	-	-	-	rpsJ_V57M	-	porB1b_G120K	-
ECDC_ES18_8446	2018	Spain	Not stated	EuroGASP2018	PRJEB34068	ERR9837367	SAMEA5785106	No data	S	No data	I	1.5	R	<0,016	S	0.016	S	0.012	S	No data	I	new	new	29	9363	126	39	67	238	148	153	133	3607	2.048	39	11	100	100	100	100	-	-	-	-	-	rpsJ_V57M	-	porB1b_G120K	-
ECDC_FI18_18GC01369	2018	Finland	Not stated	EuroGASP2018	PRJEB34068	ERR9838629	SAMEA6105802	No data	S	No data	R	0.094	S	0.016	S	0.016	S	1	R	No data	R	new	new	2056	1587	59	39	67	78	148	153	133	719	2.002	89	100	100	7	4	100	-	-	-	blaTEM	tetM	rpsJ_V57M	-	-	-
ECDC_FI18_18GC01390	2018	Finland	Not stated	EuroGASP2018	PRJEB34068	ERR9838641	SAMEA6105806	No data	S	No data	R	0.094	S	<0,016	S	<0,016	S	1	R	No data	R	new	new	21	1587	59	39	67	78	148	153	133	1658	2.002	89	100	100	7	20	100	-	-	-	blaTEM	tetM	rpsJ_V57M	-	-	-
ECDC_FI18_18GC01391	2018	Finland	Not stated	EuroGASP2018	PRJEB34068	ERR9838644	SAMEA6105807	No data	S	No data	R	0.125	S	0.016	S	<0,016	S	0.38	R	No data	R	14769	55	1971	1583	59	39	67	111	148	153	65	539	43.002	122	1	100	7	6	100	-	-	-	blaTEM	tetM	rpsJ_V57M	-	-	-
ECDC_FI18_18GC01396	2018	Finland	Not stated	EuroGASP2018	PRJEB34068	ERR9838647	SAMEA6105808	No data	S	No data	R	0.094	S	<0,016	S	<0,016	S	1	R	No data	R	13848	161	719	1588	59	39	67	158	148	71	65	271	19.001	47	14	1	7	17	100	-	-	-	blaTEM	tetM	rpsJ_V57M	-	-	-
ECDC_FI18_18GC01404	2018	Finland	Not stated	EuroGASP2018	PRJEB34068	ERR9838649	SAMEA6105809	No data	S	No data	R	0.125	S	0.064	S	0.016	S	4	R	No data	R	2318	1053	4	7827	59	39	67	158	148	153	65	38	13.001	19	8	1	1	9	100	-	-	-	-	-	rpsJ_V57M	-	porB1b_G120K	porB1b_A121D
ECDC_FI18_18GC01408	2018	Finland	Not stated	EuroGASP2018	PRJEB34068	ERR9838650	SAMEA6105811	No data	S	No data	R	0.25	S	0.016	S	0.064	S	0.5	R	No data	R	13848	161	719	1588	59	39	67	158	148	71	65	271	19.001	47	14	1	7	17	100	-	-	-	blaTEM	tetM	rpsJ_V57M	-	-	-
ECDC_FI18_18GC01409	2018	Finland	Not stated	EuroGASP2018	PRJEB34068	ERR9838656	SAMEA6105810	No data	S	No data	R	0.064	S	<0,016	S	<0,016	S	1	R	No data	R	568	90	33	11251	59	39	67	78	148	71	133	3574	2.001	54	13	100	1	22	100	-	-	-	blaTEM	tetM	rpsJ_V57M	-	-	-
ECDC_FI18_18GC01443	2018	Finland	Not stated	EuroGASP2018	PRJEB34068	ERR9838250	SAMEA6105816	No data	S	No data	I	0.047	R	0.016	S	0.016	S	0.75	R	No data	I	new	new	267	11982	126	39	67	238	148	153	65	1487	2.001	39	1	100	7	4	100	-	-	-	-	-	rpsJ_V57M	-	-	-
ECDC_FI18_18GC01452	2018	Finland	Not stated	EuroGASP2018	PRJEB34068	ERR9838438	SAMEA6105819	No data	S	No data	I	32	R	0.016	S	0.002	S	3	R	No data	I	new	4993	267	9363	126	39	67	238	148	153	133	1039	2.001	39	11	100	7	4	2	-	-	23S_rDNA_c2597t	-	-	rpsJ_V57M	-	porB1b_G120K	-
ECDC_FI18_18GC01458	2018	Finland	Not stated	EuroGASP2018	PRJEB34068	ERR9837900	SAMEA6105820	No data	S	No data	I	0.25	S	0.016	S	0.023	S	0.5	R	No data	R	13476	90	188	8143	59	39	170	78	146	154	65	426	2.002	40	13	100	7	4	100	-	-	-	blaTEM	-	rpsJ_V57M	-	-	-
ECDC_FI18_18GC01461	2018	Finland	Not stated	EuroGASP2018	PRJEB34068	ERR9838443	SAMEA6105822	No data	S	No data	I	0.25	S	0.016	S	0.125	S	0.008	S	No data	I	649	442	29	1580	126	39	67	111	148	153	133	182	2.001	25	3	100	100	100	100	-	-	-	-	-	rpsJ_V57M	-	-	-
ECDC_FI18_18GC01529	2018	Finland	Not stated	EuroGASP2018	PRJEB34068	ERR9838461	SAMEA6105830	No data	S	No data	R	0.094	S	<0,016	S	<0,016	S	0.75	R	No data	R	new	new	719	1588	59	39	67	158	148	71	65	271	19.001	47	14	1	7	17	100	-	-	-	blaTEM	tetM	rpsJ_V57M	-	-	-
ECDC_FI18_18GC01564	2018	Finland	Not stated	EuroGASP2018	PRJEB34068	ERR9838494	SAMEA6105842	No data	S	No data	R	0.047	S	0.016	S	0.016	S	0.5	R	No data	R	new	new	21	1587	59	39	67	78	148	153	133	1658	2.002	89	100	100	7	20	100	-	-	-	blaTEM	tetM	rpsJ_V57M	-	-	-
ECDC_FI18_18GC01569	2018	Finland	Not stated	EuroGASP2018	PRJEB34068	ERR9838496	SAMEA6105841	No data	S	No data	I	0.094	S	0.016	S	0.016	S	0.004	S	No data	I	649	442	29	1580	126	39	67	111	148	153	133	182	2.001	25	3	100	100	100	100	-	-	-	-	-	rpsJ_V57M	-	-	-
ECDC_FI18_18GC01579	2018	Finland	Not stated	EuroGASP2018	PRJEB34068	ERR9838265	SAMEA6105884	No data	S	No data	R	0.19	S	0.016	S	<0,016	S	1.5	R	No data	R	338	90	121	1588	59	39	67	158	148	71	65	1873	19.001	261	13	1	7	3	100	-	-	-	blaTEM	-	rpsJ_V57M	-	-	-
ECDC_FR13_056	2013	France	FR13_056	EuroGASP2013	PRJEB9227	ERR1560951	SAMEA3485741	No data	S	No data	I	0.25	S	0.016	S	0.004	S	6	R	No data	R	5624	90	953	8143	59	39	170	78	146	154	65	426	2.002	40	13	100	7	4	100	-	-	-	blaTEM	-	rpsJ_V57M	-	-	-
ECDC_FR13_057	2013	France	FR13_057	EuroGASP2013	PRJEB9227	ERR1560952	SAMEA3485742	No data	S	No data	I	0.19	S	0.016	S	0.003	S	0.008	S	No data	I	7994	4767	29	9363	126	39	67	238	148	153	133	new	2.001	9	1	100	100	100	new	-	-	-	-	-	rpsJ_V57M	-	-	-
ECDC_FR13_062	2013	France	FR13_062	EuroGASP2013	PRJEB9227	ERR1602745	SAMEA3485747	No data	S	No data	R	0.19	S	0.047	S	0.032	S	24	R	No data	R	11352	6642	4	7827	59	39	67	158	148	153	65	new	13.001	19	8	1	1	9	new	-	-	-	blaTEM	-	rpsJ_V57M	-	porB1b_G120K	porB1b_A121D
ECDC_FR13_063	2013	France	FR13_063	EuroGASP2013	PRJEB9227	ERR1602746	SAMEA3485748	No data	S	No data	R	0.25	S	0.047	S	0.047	S	32	R	No data	R	11352	6642	4	7827	59	39	67	158	148	153	65	new	13.001	19	8	1	1	9	new	-	-	-	blaTEM	-	rpsJ_V57M	-	porB1b_G120K	porB1b_A121D
ECDC_FR13_064	2013	France	FR13_064	EuroGASP2013	PRJEB9227	ERR1602747	SAMEA3485749	No data	S	No data	R	0.094	S	0.047	S	0.047	S	32	R	No data	R	11352	6642	4	7827	59	39	67	158	148	153	65	new	13.001	19	8	1	1	9	new	-	-	-	blaTEM	-	rpsJ_V57M	-	porB1b_G120K	porB1b_A121D
ECDC_FR13_066	2013	France	FR13_066	EuroGASP2013	PRJEB9227	ERR1602749	SAMEA3485751	No data	S	No data	I	0.094	S	0.19	R	0.047	S	32	R	No data	R	11018	6418	10	7363	59	39	67	78	148	153	65	348	10.001	33	8	1	2	5	100	-	-	-	-	-	rpsJ_V57M	-	porB1b_G120K	porB1b_A121D
ECDC_FR13_078	2013	France	FR13_078	EuroGASP2013	PRJEB9227	ERR1602761	SAMEA3485387	No data	S	No data	I	0.19	S	0.19	R	0.064	S	32	R	No data	I	11106	6591	10	7363	59	39	67	78	148	153	65	487	10.001	33	11	1	2	5	100	-	-	-	-	-	rpsJ_V57M	-	porB1b_G120K	-
ECDC_FR13_080	2013	France	FR13_080	EuroGASP2013	PRJEB9227	ERR1602763	SAMEA3485389	No data	S	No data	I	0.047	S	0.016	S	0.002	S	0.004	S	No data	I	2	2	16	11975	59	39	762	111	188	71	223	84	22.001	15	100	100	100	7	100	-	-	-	-	-	rpsJ_V57M	-	-	-
ECDC_FR13_087	2013	France	FR13_087	EuroGASP2013	PRJEB9227	ERR1602770	SAMEA3485396	No data	S	No data	I	0.19	S	0.016	S	0.004	S	3	R	No data	I	5624	90	953	8143	59	39	170	78	146	154	65	426	2.002	40	13	100	7	4	100	-	-	-	-	-	rpsJ_V57M	-	-	-
ECDC_FR13_089	2013	France	FR13_089	EuroGASP2013	PRJEB9227	ERR1602772	SAMEA3485398	No data	S	No data	I	0.38	S	0.016	S	0.004	S	0.008	S	No data	I	11356	6645	29	9363	126	39	67	238	148	153	133	63	2.001	9	1	100	100	100	100	-	-	-	-	-	rpsJ_V57M	-	-	-
ECDC_FR13_098	2013	France	FR13_098	EuroGASP2013	PRJEB9227	ERR1602781	SAMEA3485407	No data	S	No data	R	0.25	S	0.016	S	0.004	S	4	R	No data	I	11103	5280	16	1582	59	39	170	78	148	154	65	896	2.002	19	100	100	1	18	100	-	-	-	-	-	rpsJ_V57M	-	-	-
ECDC_FR13_099	2013	France	FR13_099	EuroGASP2013	PRJEB9227	ERR1602782	SAMEA3485408	No data	S	No data	R	0.047	S	0.016	S	0.006	S	1	R	No data	R	11357	6646	1100	1588	59	39	67	158	148	71	65	433	19.001	47	3	1	7	17	100	-	-	-	blaTEM	tetM	rpsJ_V57M	-	-	-
ECDC_FR13_101	2013	France	FR13_101	EuroGASP2013	PRJEB9227	ERR1602784	SAMEA3485410	No data	S	No data	I	0.19	S	0.016	S	0.003	S	3	R	No data	R	5624	90	953	8143	59	39	170	78	146	154	65	426	2.002	40	13	100	7	4	100	-	-	-	blaTEM	-	rpsJ_V57M	-	-	-
ECDC_FR13_104	2013	France	FR13_104	EuroGASP2013	PRJEB9227	ERR1602787	SAMEA3485413	No data	S	No data	R	0.032	S	0.016	S	0.003	S	1	R	No data	R	11357	6646	1100	1588	59	39	67	158	148	71	65	433	19.001	47	3	1	7	17	100	-	-	-	blaTEM	tetM	rpsJ_V57M	-	-	-
ECDC_FR13_105	2013	France	FR13_105	EuroGASP2013	PRJEB9227	ERR1602788	SAMEA3485414	No data	S	No data	I	0.19	S	0.016	S	0.003	S	0.006	S	No data	I	2992	1808	29	11982	126	39	67	238	148	153	65	new	2.001	9	1	100	100	100	new	-	-	-	-	-	rpsJ_V57M	-	-	-
ECDC_FR13_106	2013	France	FR13_106	EuroGASP2013	PRJEB9227	ERR1602789	SAMEA3485415	No data	S	No data	R	0.032	S	0.016	S	0.002	S	0.5	R	No data	I	11210	6596	60	7823	435	39	170	111	148	153	65	847	1.001	1	14	1	7	2	100	-	-	-	-	tetM	-	-	-	-
ECDC_FR13_108	2013	France	FR13_108	EuroGASP2013	PRJEB9227	ERR1602791	SAMEA3485417	No data	S	No data	R	0.19	S	0.016	S	0.002	S	0.25	R	No data	R	9806	61	60	7823	435	39	170	111	148	153	65	849	1.001	18	100	1	7	2	100	-	-	-	blaTEM	tetM	-	-	-	-
ECDC_FR18_04	2018	France	Not stated	EuroGASP2018	PRJEB34068	ERR9839236	SAMEA6106645	No data	S	No data	R	0.25	S	<0,016	S	0.008	S	0.5	R	No data	R	15589	7738	1971	1583	59	39	67	111	148	153	65	1340	43.002	122	100	100	7	6	100	-	-	-	blaTEM	tetM	rpsJ_V57M	-	-	-
ECDC_FR18_05	2018	France	Not stated	EuroGASP2018	PRJEB34068	ERR9839237	SAMEA6106648	No data	S	No data	R	0.125	S	0.016	S	0.008	S	0.5	R	No data	R	15589	7738	1971	1583	59	39	67	111	148	153	65	1340	43.002	122	100	100	7	6	100	-	-	-	blaTEM	tetM	rpsJ_V57M	-	-	-
ECDC_FR18_06	2018	France	Not stated	EuroGASP2018	PRJEB34068	ERR9839243	SAMEA6106647	No data	S	No data	I	0.25	S	<0,016	S	0.002	S	2	R	No data	I	new	new	2158	8143	59	39	170	78	146	154	65	427	2.002	40	100	100	7	4	100	-	-	-	-	-	rpsJ_V57M	-	-	-
ECDC_FR18_09	2018	France	Not stated	EuroGASP2018	PRJEB34068	ERR9839252	SAMEA6106651	No data	S	No data	I	2	R	<0,016	S	0.008	S	0.016	S	No data	I	3935	908	29	11422	109	39	67	238	148	153	133	193	2.001	39	11	100	100	100	100	-	-	-	-	-	rpsJ_V57M	-	porB1b_G120K	-
ECDC_FR18_11	2018	France	Not stated	EuroGASP2018	PRJEB34068	ERR9839322	SAMEA6106557	No data	S	No data	R	0.25	S	0.032	S	0.016	S	2	R	No data	I	new	new	4	7827	59	39	67	158	148	153	65	175	13.001	19	1	1	1	9	100	-	-	-	-	-	rpsJ_V57M	-	-	-
ECDC_FR18_12	2018	France	Not stated	EuroGASP2018	PRJEB34068	ERR9839323	SAMEA6106560	No data	S	No data	R	0.125	S	<0,016	S	0.002	S	0.5	R	No data	R	15589	7738	1971	1583	59	39	67	111	148	153	65	3310	2.001	122	100	100	7	6	100	-	-	-	blaTEM	tetM	rpsJ_V57M	-	-	-
ECDC_FR18_13	2018	France	Not stated	EuroGASP2018	PRJEB34068	ERR9838226	SAMEA6106561	No data	S	No data	I	0.064	S	<0,016	S	<0,002	S	0.002	S	No data	I	new	new	16	11975	59	39	762	111	188	71	223	3684	22.001	15	100	100	100	7	56	-	-	-	-	-	rpsJ_V57M	-	-	-
ECDC_FR18_14	2018	France	Not stated	EuroGASP2018	PRJEB34068	ERR9839328	SAMEA6106562	No data	S	No data	R	0.125	S	<0,016	S	0.004	S	1	R	No data	R	new	new	1971	1583	59	39	67	111	148	153	65	1340	43.002	122	100	100	7	6	100	-	-	-	blaTEM	tetM	rpsJ_V57M	-	-	-
ECDC_FR18_15	2018	France	Not stated	EuroGASP2018	PRJEB34068	ERR9838229	SAMEA6106564	No data	S	No data	I	2	R	<0,016	S	0.004	S	8	R	No data	I	12302	908	267	9363	126	39	67	238	148	153	133	168	2.001	39	11	100	7	4	100	-	-	-	-	-	rpsJ_V57M	-	porB1b_G120K	-
ECDC_FR18_21	2018	France	Not stated	EuroGASP2018	PRJEB34068	ERR9838234	SAMEA6106566	No data	S	No data	I	0.125	S	0.016	S	0.008	S	0.003	S	No data	I	2	2	16	11975	59	39	762	111	188	71	223	84	22.001	15	100	100	100	7	100	-	-	-	-	-	rpsJ_V57M	-	-	-
ECDC_FR18_28	2018	France	Not stated	EuroGASP2018	PRJEB34068	ERR9839345	SAMEA6106574	No data	S	No data	I	0.25	S	0.016	S	0.008	S	4	R	No data	I	11421	851	953	13266	59	39	170	78	146	530	65	1266	2.002	40	8	100	7	4	100	-	-	-	-	-	rpsJ_V57M	-	porB1b_G120K	porB1b_A121D
ECDC_FR18_29	2018	France	Not stated	EuroGASP2018	PRJEB34068	ERR9839352	SAMEA6106571	No data	S	No data	I	0.016	S	0.032	S	0.008	S	1	R	No data	I	new	90	new	13142	59	39	170	78	146	71	65	2601	19.001	40	13	100	7	4	100	-	-	-	-	-	rpsJ_V57M	-	-	-
ECDC_FR18_34	2018	France	Not stated	EuroGASP2018	PRJEB34068	ERR9838235	SAMEA6106576	No data	S	No data	I	0.125	S	0.016	S	0.016	S	0.002	S	No data	I	new	new	16	8163	59	39	170	111	188	71	223	84	22.001	15	100	100	100	7	100	-	-	-	-	-	rpsJ_V57M	-	-	-
ECDC_FR18_37	2018	France	Not stated	EuroGASP2018	PRJEB34068	ERR9839374	SAMEA6106581	No data	S	No data	R	0.064	S	<0,016	S	0.004	S	0.75	R	No data	I	new	new	1971	1583	59	39	67	111	148	153	65	1340	43.002	122	100	100	7	6	100	-	-	-	-	tetM	rpsJ_V57M	-	-	-
ECDC_FR18_38	2018	France	Not stated	EuroGASP2018	PRJEB34068	ERR9839375	SAMEA6106578	No data	S	No data	R	0.125	S	<0,016	S	0.002	S	1	R	No data	R	14769	55	1971	1583	59	39	67	111	148	153	65	3728	43.002	122	1	100	52	6	100	-	-	-	blaTEM	tetM	rpsJ_V57M	-	-	-
ECDC_FR18_40	2018	France	Not stated	EuroGASP2018	PRJEB34068	ERR9838412	SAMEA6106583	No data	S	No data	I	0.5	S	<0,016	S	0.002	S	0.002	S	No data	I	2	2	16	8163	59	39	170	111	188	71	223	84	22.001	15	100	100	100	7	100	-	-	-	-	-	rpsJ_V57M	-	-	-
ECDC_FR18_44	2018	France	Not stated	EuroGASP2018	PRJEB34068	ERR9839391	SAMEA6106587	No data	S	No data	R	0.25	S	<0,016	S	0.002	S	2	R	No data	R	14769	55	1971	1583	59	39	67	111	148	153	65	539	43.002	122	1	100	7	6	100	-	-	-	blaTEM	tetM	rpsJ_V57M	-	-	-
ECDC_FR18_45	2018	France	Not stated	EuroGASP2018	PRJEB34068	ERR9839393	SAMEA6106588	No data	S	No data	R	0.5	S	0.032	S	0.016	S	0.5	R	No data	I	14700	3031	4	13489	59	39	67	158	148	153	918	1225	13.001	19	3	1	1	9	100	-	-	-	-	-	rpsJ_V57M	-	-	-
ECDC_FR18_46	2018	France	Not stated	EuroGASP2018	PRJEB34068	ERR9839399	SAMEA6106586	No data	S	No data	R	0.5	S	0.016	S	0.008	S	4	R	No data	I	8922	65	1100	16501	1168	39	67	158	148	71	65	433	19.001	47	3	1	7	17	100	-	-	-	-	tetM	rpsJ_V57M	-	-	-
ECDC_FR18_48	2018	France	Not stated	EuroGASP2018	PRJEB34068	ERR9839406	SAMEA6106589	No data	S	No data	R	0.5	S	<0,016	S	0.002	S	4	R	No data	R	new	new	1971	1583	59	39	67	111	148	153	65	1340	43.002	122	100	100	7	6	100	-	-	-	blaTEM	tetM	rpsJ_V57M	-	-	-
ECDC_FR18_55	2018	France	Not stated	EuroGASP2018	PRJEB34068	ERR9839423	SAMEA6106596	No data	S	No data	R	0.125	S	<0,016	S	<0,002	S	4	R	No data	R	14769	55	1971	1583	59	39	67	111	148	153	65	539	43.002	122	1	100	7	6	100	-	-	-	blaTEM	tetM	rpsJ_V57M	-	-	-
ECDC_FR18_58	2018	France	Not stated	EuroGASP2018	PRJEB34068	ERR9838513	SAMEA6105849	No data	S	No data	R	0.064	S	<0,016	S	0.008	S	0.064	R	No data	R	5451	64	60	1603	109	39	67	78	148	71	65	1336	2.001	18	14	1	1	3	100	-	-	-	blaTEM	tetM	rpsJ_V57M	-	-	-
ECDC_FR18_61	2018	France	Not stated	EuroGASP2018	PRJEB34068	ERR9839440	SAMEA6106623	No data	S	No data	R	0.125	S	<0,016	S	0.008	S	1	R	No data	R	14769	55	1971	1583	59	39	67	111	148	153	65	539	43.002	122	1	100	7	6	100	-	-	-	blaTEM	tetM	rpsJ_V57M	-	-	-
ECDC_GC_060	2013	Norway	GC_060	EuroGASP2013	PRJEB9227	ERR1469710	SAMEA3374681	No data	S	No data	I	4	R	0.016	S	0.004	S	No data	S	No data	I	2992	1808	29	11463	126	39	67	238	734	153	133	64	2.001	9	1	100	100	100	2	-	-	23S_rDNA_c2597t	-	-	rpsJ_V57M	-	-	-
ECDC_GC_065	2013	Norway	GC_065	EuroGASP2013	PRJEB9227	ERR1469715	SAMEA3374686	No data	S	No data	I	No data	S	0.016	S	0.012	S	No data	R	No data	R	10830	2644	110	11968	59	39	170	111	146	154	65	897	2.002	40	12	100	1	4	100	-	-	-	blaTEM	-	rpsJ_V57M	-	porB1b_G120K	-
ECDC_GC_067	2013	Norway	GC_067	EuroGASP2013	PRJEB9227	ERR1469717	SAMEA3374688	No data	S	No data	I	No data	S	0.032	S	0.012	S	No data	S	No data	I	359	301	29	8126	126	39	67	78	148	153	133	new	66.001	25	3	100	100	100	new	-	-	-	-	-	rpsJ_V57M	-	-	-
ECDC_GC_073	2013	Norway	GC_073	EuroGASP2013	PRJEB9227	ERR1469723	SAMEA3374694	No data	S	No data	R	No data	S	0.016	S	0.012	S	No data	R	No data	I	10791	6320	33	7822	126	39	170	111	148	153	65	957	88.001	19	14	100	7	3	100	-	-	-	-	tetM	rpsJ_V57M	-	-	-
ECDC_GC_080	2013	Norway	GC_080	EuroGASP2013	PRJEB9227	ERR1469730	SAMEA3374701	No data	S	No data	I	No data	S	0.016	S	0.006	S	No data	S	No data	I	10419	1873	29	9363	126	39	67	238	148	153	133	new	80.001	9	1	100	100	100	new	-	-	-	-	-	rpsJ_V57M	-	-	-
ECDC_GC_081	2013	Norway	GC_081	EuroGASP2013	PRJEB9227	ERR1469731	SAMEA3374702	No data	S	No data	I	No data	S	0.016	S	0.008	S	No data	R	No data	R	8426	908	953	8143	59	39	170	78	146	154	65	new	2.002	40	11	100	7	4	new	-	-	-	blaTEM	-	rpsJ_V57M	-	porB1b_G120K	-
ECDC_GC_082	2013	Norway	GC_082	EuroGASP2013	PRJEB9227	ERR1469732	SAMEA3374703	No data	S	No data	R	No data	S	0.016	S	0.008	S	No data	R	No data	I	5785	402	33	7822	126	39	170	111	148	153	65	957	88.001	19	14	100	7	3	100	-	-	-	-	tetM	rpsJ_V57M	-	-	-
ECDC_GC_084	2013	Norway	GC_084	EuroGASP2013	PRJEB9227	ERR1469734	SAMEA3374705	No data	S	No data	R	0.5	S	0.016	S	0.006	S	No data	R	No data	R	10793	6322	21	1583	59	39	67	111	148	153	65	885	2.001	16	19	100	1	18	100	-	-	-	blaTEM	tetM	rpsJ_V57M	-	-	-
ECDC_GC_086	2013	Norway	GC_086	EuroGASP2013	PRJEB9227	ERR1469736	SAMEA3374707	No data	S	No data	R	No data	S	0.016	S	0.002	S	No data	S	No data	R	10794	6323	139	7367	109	39	67	111	148	153	133	989	89.001	19	8	1	100	1	100	-	-	-	-	-	rpsJ_V57M	-	porB1b_G120K	porB1b_A121D
ECDC_GC_088	2013	Norway	GC_088	EuroGASP2013	PRJEB9227	ERR1469737	SAMEA3374709	No data	S	No data	I	No data	S	0.016	S	0.006	S	No data	R	No data	R	1498	161	29	11963	59	39	67	111	149	154	65	606	2.002	54	14	100	1	22	100	-	-	-	blaTEM	-	rpsJ_V57M	-	-	-
ECDC_GC_092	2013	Norway	GC_092	EuroGASP2013	PRJEB9227	ERR1469741	SAMEA3374713	No data	S	No data	R	0.38	S	0.047	S	0.047	S	No data	R	No data	I	225	4	4	1901	109	39	170	111	148	153	65	177	12.004	1	8	1	1	3	100	-	-	-	-	-	rpsJ_V57M	-	porB1b_G120K	porB1b_A121D
ECDC_GC_094	2013	Norway	GC_094	EuroGASP2013	PRJEB9227	ERR1469743	SAMEA3374715	No data	S	No data	R	No data	S	0.016	S	0.008	S	No data	R	No data	I	11359	3623	487	7822	126	39	170	111	148	153	65	798	2.002	19	13	1	7	3	100	-	-	-	-	tetM	rpsJ_V57M	-	-	-
ECDC_GC_097	2013	Norway	GC_097	EuroGASP2013	PRJEB9227	ERR1469746	SAMEA3374718	No data	S	No data	I	No data	S	0.016	S	0.003	S	No data	R	No data	R	3109	1893	137	1588	59	39	67	158	148	71	65	871	19.001	24	12	1	7	15	100	-	-	-	blaTEM	-	rpsJ_V57M	-	porB1b_G120K	-
ECDC_GC_101	2013	Norway	GC_101	EuroGASP2013	PRJEB9227	ERR1469750	SAMEA3374722	No data	S	No data	R	No data	S	0.016	S	0.004	S	No data	R	No data	R	8006	1050	21	1583	59	39	67	111	148	153	65	886	2.001	164	100	100	1	18	100	-	-	-	blaTEM	tetM	rpsJ_V57M	-	-	-
ECDC_GC_108	2013	Norway	GC_108	EuroGASP2013	PRJEB9227	ERR1469757	SAMEA3374729	No data	S	No data	R	No data	S	0.016	S	0.023	S	No data	R	No data	I	661	443	10	1582	59	39	170	78	148	154	65	186	2.002	19	8	100	1	18	100	-	-	-	-	-	rpsJ_V57M	-	porB1b_G120K	porB1b_A121D
ECDC_GE13_065	2013	Germany	GE13-065	EuroGASP2013	PRJEB9227	ERR1549682	SAMEA3468092	No data	S	No data	I	No data	S	0.016	S	0.006	S	No data	S	No data	I	4751	2866	29	9363	126	39	67	238	148	153	133	new	2.001	9	1	100	100	100	new	-	-	-	-	-	rpsJ_V57M	-	-	-
ECDC_GE13_078	2013	Germany	GE13-078	EuroGASP2013	PRJEB9227	ERR1549692	SAMEA3468103	No data	S	No data	R	No data	S	0.016	S	0.023	S	No data	R	No data	R	6961	4157	137	1588	59	39	67	158	148	71	65	567	19.001	38	12	1	7	26	100	-	-	-	blaTEM	tetM	rpsJ_V57M	-	porB1b_G120K	-
ECDC_GE13_081	2013	Germany	GE13-081	EuroGASP2013	PRJEB9227	ERR1680318	SAMEA3468106	No data	S	No data	I	No data	S	0.016	S	0.006	S	No data	S	No data	I	2992	1808	29	9363	126	39	67	238	148	153	133	new	2.001	9	1	100	100	100	new	-	-	-	-	-	rpsJ_V57M	-	-	-
ECDC_GE13_082	2013	Germany	GE13-082	EuroGASP2013	PRJEB9227	ERR1549694	SAMEA3468107	No data	S	No data	R	No data	S	0.016	S	0.016	S	No data	R	No data	I	2226	242	21	1582	59	39	170	78	148	154	65	186	2.002	19	8	100	1	18	100	-	-	-	-	-	rpsJ_V57M	-	porB1b_G120K	porB1b_A121D
ECDC_GE13_083	2013	Germany	GE13-083	EuroGASP2013	PRJEB9227	ERR1549695	SAMEA3468108	No data	S	No data	R	No data	S	0.016	S	0.023	S	No data	R	No data	I	2226	242	21	1582	59	39	170	78	148	154	65	186	2.002	19	8	100	1	18	100	-	-	-	-	-	rpsJ_V57M	-	porB1b_G120K	porB1b_A121D
ECDC_GE13_084	2013	Germany	GE13-084	EuroGASP2013	PRJEB9227	ERR1549696	SAMEA3468109	No data	S	No data	I	No data	S	0.016	S	0.012	S	No data	S	No data	I	2992	1808	29	9363	126	39	67	238	148	153	133	new	2.001	9	1	100	100	100	new	-	-	-	-	-	rpsJ_V57M	-	-	-
ECDC_GE13_086	2013	Germany	GE13-086	EuroGASP2013	PRJEB9227	ERR1549698	SAMEA3468111	No data	S	No data	I	No data	S	0.032	S	0.023	S	No data	S	No data	I	359	301	29	8126	126	39	67	78	148	153	133	987	66.001	25	3	100	100	100	18	-	-	-	-	-	rpsJ_V57M	-	-	-
ECDC_GE13_087	2013	Germany	GE13-087	EuroGASP2013	PRJEB9227	ERR1680319	SAMEA3468112	No data	S	No data	I	No data	S	0.032	S	0.023	S	No data	S	No data	I	359	301	29	8126	126	39	67	78	148	153	133	new	66.001	25	3	100	100	100	new	-	-	-	-	-	rpsJ_V57M	-	-	-
ECDC_GE13_088	2013	Germany	GE13-088	EuroGASP2013	PRJEB9227	ERR1549699	SAMEA3468113	No data	S	No data	I	No data	S	0.016	S	0.012	S	No data	R	No data	R	10826	3643	953	8143	59	39	170	78	146	154	65	1900	2.002	40	11	100	7	4	100	-	-	-	blaTEM	-	rpsJ_V57M	-	porB1b_G120K	-
ECDC_GE13_089	2013	Germany	GE13-089	EuroGASP2013	PRJEB9227	ERR1549700	SAMEA3468115	No data	S	No data	I	No data	S	0.032	S	0.023	S	No data	S	No data	I	10784	6313	29	8126	126	39	67	78	148	153	133	987	66.001	25	3	100	100	100	18	-	-	-	-	-	rpsJ_V57M	-	-	-
ECDC_GE13_100	2013	Germany	GE13-100	EuroGASP2013	PRJEB9227	ERR1549708	SAMEA3468132	No data	S	No data	I	No data	S	0.047	S	0.023	S	No data	S	No data	I	359	301	29	8126	126	39	67	78	148	153	133	987	66.001	25	3	100	100	100	18	-	-	-	-	-	rpsJ_V57M	-	-	-
ECDC_GE13_104	2013	Germany	GE13-104	EuroGASP2013	PRJEB9227	ERR1549710	SAMEA3468137	No data	S	No data	I	No data	S	0.016	S	0.012	S	No data	S	No data	I	9500	3381	49	9363	126	39	67	238	148	153	133	new	2.001	9	1	100	100	100	new	-	-	-	-	-	rpsJ_V57M	-	-	-
ECDC_GE13_105	2013	Germany	GE13-105	EuroGASP2013	PRJEB9227	ERR1549711	SAMEA3468139	No data	S	No data	R	No data	S	0.016	S	0.023	S	No data	R	No data	R	6961	4157	137	1588	59	39	67	158	148	71	65	247	19.001	38	12	1	7	15	100	-	-	-	blaTEM	tetM	rpsJ_V57M	-	porB1b_G120K	-
ECDC_GE13_106	2013	Germany	GE13-106	EuroGASP2013	PRJEB9227	ERR1549712	SAMEA3468141	No data	S	No data	I	No data	S	0.023	S	0.016	S	No data	S	No data	I	9500	3381	49	9363	126	39	67	238	148	153	133	63	2.001	9	1	100	100	100	100	-	-	-	-	-	rpsJ_V57M	-	-	-
ECDC_GE13_109	2013	Germany	GE13-109	EuroGASP2013	PRJEB9227	ERR1549715	SAMEA3468147	No data	S	No data	I	No data	S	0.016	S	0.012	S	No data	S	No data	I	9500	3381	49	9363	126	39	67	238	148	153	133	63	2.001	9	1	100	100	100	100	-	-	-	-	-	rpsJ_V57M	-	-	-
ECDC_GE18_015	2018	Germany	Not stated	EuroGASP2018	PRJEB34068	ERR9837874	SAMEA6105714	No data	S	No data	R	0.19	S	0.016	S	0.006	S	0.75	R	No data	R	15589	7738	1971	1583	59	39	67	111	148	153	65	1340	43.002	122	100	100	7	6	100	-	-	-	blaTEM	tetM	rpsJ_V57M	-	-	-
ECDC_GE18_017	2018	Germany	Not stated	EuroGASP2018	PRJEB34068	ERR9838449	SAMEA6105716	No data	S	No data	R	0.19	S	0.023	S	0.032	S	8	R	No data	R	10386	246	4	7827	59	39	67	158	148	153	65	38	13.001	19	8	1	1	9	100	-	-	-	-	-	rpsJ_V57M	-	porB1b_G120K	porB1b_A121D
ECDC_GE18_019	2018	Germany	Not stated	EuroGASP2018	PRJEB34068	ERR9838455	SAMEA6105720	No data	S	No data	R	0.047	S	0.016	S	0.002	S	1.5	R	No data	I	new	new	2114	1582	59	39	170	78	148	154	65	3594	2.002	48	19	100	7	18	100	-	-	-	-	tetM	rpsJ_V57M	-	-	-
ECDC_GE18_023	2018	Germany	Not stated	EuroGASP2018	PRJEB34068	ERR9838460	SAMEA6105721	No data	S	No data	R	0.125	S	0.016	S	0.008	S	0.5	R	No data	R	new	new	2056	1588	59	39	67	158	148	71	65	1926	19.001	38	37	1	7	15	100	-	-	-	blaTEM	tetM	rpsJ_V57M	-	-	-
ECDC_GE18_026	2018	Germany	Not stated	EuroGASP2018	PRJEB34068	ERR9838470	SAMEA6105725	No data	S	No data	R	0.047	S	0.016	S	0.002	S	1.5	R	No data	R	new	new	1473	1587	59	39	67	78	148	153	133	719	2.002	89	100	100	7	4	100	-	-	-	blaTEM	tetM	rpsJ_V57M	-	-	-
ECDC_GE18_028	2018	Germany	Not stated	EuroGASP2018	PRJEB34068	ERR9838475	SAMEA6105727	No data	S	No data	R	0.125	S	0.016	S	0.006	S	0.19	R	No data	R	14769	55	1971	1583	59	39	67	111	148	153	65	539	43.002	122	1	100	7	6	100	-	-	-	blaTEM	tetM	rpsJ_V57M	-	-	-
ECDC_GE18_035	2018	Germany	Not stated	EuroGASP2018	PRJEB34068	ERR9838254	SAMEA6105734	No data	S	No data	I	0.125	S	0.016	S	0.002	S	4	R	No data	I	9918	5860	953	13526	59	39	170	78	146	154	133	436	2.002	40	100	100	7	3	100	-	-	-	-	-	rpsJ_V57M	-	-	-
ECDC_GE18_038	2018	Germany	Not stated	EuroGASP2018	PRJEB34068	ERR9838259	SAMEA6105739	No data	S	No data	R	0.19	S	0.016	S	0.003	S	8	R	No data	R	new	new	953	8143	59	39	170	78	146	154	65	1900	2.002	40	11	100	7	4	100	-	-	-	blaTEM	tetM	rpsJ_V57M	-	porB1b_G120K	-
ECDC_GE18_042	2018	Germany	Not stated	EuroGASP2018	PRJEB34068	ERR9838267	SAMEA6105740	No data	S	No data	I	1.5	R	0.016	S	0.006	S	0.012	S	No data	I	5035	1914	29	new	126	39	67	238	148	new	133	193	2.001	39	11	100	100	100	100	-	-	-	-	-	rpsJ_V57M	-	porB1b_G120K	-
ECDC_GE18_045	2018	Germany	Not stated	EuroGASP2018	PRJEB34068	ERR9838506	SAMEA6105744	No data	S	No data	R	0.023	S	0.016	S	0.006	S	0.5	R	No data	R	15589	7738	1971	1583	59	39	67	111	148	153	65	1340	43.002	122	100	100	7	6	100	-	-	-	blaTEM	tetM	rpsJ_V57M	-	-	-
ECDC_GE18_051	2018	Germany	Not stated	EuroGASP2018	PRJEB34068	ERR9838516	SAMEA6105749	No data	S	No data	R	0.19	S	0.016	S	0.006	S	1	R	No data	R	15589	7738	1971	1583	59	39	67	111	148	153	65	1340	43.002	122	100	100	7	6	100	-	-	-	blaTEM	tetM	rpsJ_V57M	-	-	-
ECDC_GE18_054	2018	Germany	Not stated	EuroGASP2018	PRJEB34068	ERR9838523	SAMEA6105754	No data	S	No data	R	0.125	S	0.047	S	0.023	S	4	R	No data	R	10386	246	4	7827	59	39	67	158	148	153	65	38	13.001	19	8	1	1	9	100	-	-	-	-	-	rpsJ_V57M	-	porB1b_G120K	porB1b_A121D
ECDC_GE18_073	2018	Germany	Not stated	EuroGASP2018	PRJEB34068	ERR9838320	SAMEA6105772	No data	S	No data	R	0.25	S	0.023	S	0.016	S	8	R	No data	R	2318	1053	4	7827	59	39	67	158	148	153	65	38	13.001	19	8	1	1	9	100	-	-	-	-	-	rpsJ_V57M	-	porB1b_G120K	porB1b_A121D
ECDC_GE18_079	2018	Germany	Not stated	EuroGASP2018	PRJEB34068	ERR9838331	SAMEA6105778	No data	S	No data	I	0.19	S	0.016	S	0.002	S	4	R	No data	R	9918	5860	953	8143	59	39	170	78	146	154	65	436	2.002	40	100	100	7	3	100	-	-	-	blaTEM	-	rpsJ_V57M	-	-	-
ECDC_GE18_084	2018	Germany	Not stated	EuroGASP2018	PRJEB34068	ERR9838336	SAMEA6106274	No data	S	No data	I	1	R	0.016	S	0.004	S	12	R	No data	I	12302	908	267	9363	126	39	67	238	148	153	133	168	2.001	39	11	100	7	4	100	-	-	-	-	-	rpsJ_V57M	-	porB1b_G120K	-
ECDC_GE18_090	2018	Germany	Not stated	EuroGASP2018	PRJEB34068	ERR9839520	SAMEA6106282	No data	S	No data	I	1.5	R	0.016	S	0.003	S	12	R	No data	I	12302	908	267	9363	126	39	67	238	148	153	133	168	2.001	39	11	100	7	4	100	-	-	-	-	-	rpsJ_V57M	-	porB1b_G120K	-
ECDC_GE18_095	2018	Germany	Not stated	EuroGASP2018	PRJEB34068	ERR9838341	SAMEA6106287	No data	S	No data	I	1	R	0.016	S	0.002	S	8	R	No data	I	12302	908	267	9363	126	39	67	238	148	153	133	168	2.001	39	11	100	7	4	100	-	-	-	-	-	rpsJ_V57M	-	porB1b_G120K	-
ECDC_GE18_097	2018	Germany	Not stated	EuroGASP2018	PRJEB34068	ERR9838094	SAMEA6106289	No data	S	No data	R	0.064	S	0.016	S	0.003	S	2	R	No data	I	12176	7122	2056	1587	59	39	67	78	148	153	133	719	2.002	89	100	100	7	4	100	-	-	-	-	tetM	rpsJ_V57M	-	-	-
ECDC_GE18_134	2018	Germany	Not stated	EuroGASP2018	PRJEB34068	ERR9839354	SAMEA6106329	No data	S	No data	I	1	R	0.016	S	0.003	S	12	R	No data	I	new	5650	267	9363	126	39	67	238	148	153	133	168	2.001	39	11	100	7	4	100	-	-	-	-	-	rpsJ_V57M	-	porB1b_G120K	-
ECDC_GE18_137	2018	Germany	Not stated	EuroGASP2018	PRJEB34068	ERR9839360	SAMEA6106330	No data	S	No data	I	1	R	0.016	S	0.002	S	4	R	No data	I	new	8838	267	9363	126	39	67	238	148	153	133	1487	2.001	39	1	100	7	4	100	-	-	-	-	-	rpsJ_V57M	-	-	-
ECDC_GE18_139	2018	Germany	Not stated	EuroGASP2018	PRJEB34068	ERR9839239	SAMEA6106254	No data	S	No data	I	0.25	S	0.016	S	0.004	S	3	R	No data	R	new	90	new	8143	59	39	170	78	146	154	65	426	2.002	40	13	100	7	4	100	-	-	-	blaTEM	-	rpsJ_V57M	-	-	-
ECDC_GE18_140	2018	Germany	Not stated	EuroGASP2018	PRJEB34068	ERR9837725	SAMEA6106332	No data	S	No data	I	0.38	S	0.016	S	0.003	S	0.004	S	No data	I	9208	1808	18	13292	126	39	785	156	148	153	133	439	2.001	9	1	100	100	1	100	-	-	-	-	-	rpsJ_V57M	-	-	-
ECDC_GE18_156	2018	Germany	Not stated	EuroGASP2018	PRJEB34068	ERR9839484	SAMEA6106377	No data	S	No data	R	0.25	S	0.016	S	0.008	S	1	R	No data	R	15589	7738	1971	1583	59	39	67	111	148	153	65	1340	43.002	122	100	100	7	6	100	-	-	-	blaTEM	tetM	rpsJ_V57M	-	-	-
ECDC_GE18_175	2018	Germany	Not stated	EuroGASP2018	PRJEB34068	ERR9839232	SAMEA6106395	No data	S	No data	R	0.38	S	0.032	S	0.047	S	24	R	No data	R	10386	246	4	7827	59	39	67	158	148	153	65	38	13.001	19	8	1	1	9	100	-	-	-	-	-	rpsJ_V57M	-	porB1b_G120K	porB1b_A121D
ECDC_GE18_180	2018	Germany	Not stated	EuroGASP2018	PRJEB34068	ERR9839249	SAMEA6106402	No data	S	No data	R	0.25	S	0.032	S	0.047	S	32	R	No data	R	10386	246	4	7827	59	39	67	158	148	153	65	38	13.001	19	8	1	1	9	100	-	-	-	-	-	rpsJ_V57M	-	porB1b_G120K	porB1b_A121D
ECDC_GE18_181	2018	Germany	Not stated	EuroGASP2018	PRJEB34068	ERR9839254	SAMEA6106403	No data	S	No data	R	0.25	S	0.032	S	0.032	S	32	R	No data	R	10386	246	4	7827	59	39	67	158	148	153	65	38	13.001	19	8	1	1	9	100	-	-	-	-	-	rpsJ_V57M	-	porB1b_G120K	porB1b_A121D
ECDC_GE18_185	2018	Germany	Not stated	EuroGASP2018	PRJEB34068	ERR9839263	SAMEA6106407	No data	S	No data	R	0.19	S	0.016	S	0.006	S	0.75	R	No data	R	15589	7738	1971	1583	59	39	67	111	148	153	65	1340	43.002	122	100	100	7	6	100	-	-	-	blaTEM	tetM	rpsJ_V57M	-	-	-
ECDC_GE18_196	2018	Germany	Not stated	EuroGASP2018	PRJEB34068	ERR9839285	SAMEA6106418	No data	S	No data	R	0.125	S	0.047	S	0.047	S	12	R	No data	R	10386	246	4	7827	59	39	67	158	148	153	65	38	13.001	19	8	1	1	9	100	-	-	-	-	-	rpsJ_V57M	-	porB1b_G120K	porB1b_A121D
ECDC_GR13031	2013	Greece	GR13031	EuroGASP2013	PRJEB9227	ERR1514802	SAMEA3432425	No data	S	No data	R	0.25	S	0.023	S	0.023	S	32	R	No data	I	225	4	4	1901	109	39	170	111	148	153	65	177	12.004	1	8	1	1	3	100	-	-	-	-	-	rpsJ_V57M	-	porB1b_G120K	porB1b_A121D
ECDC_GR13038	2013	Greece	GR13038	EuroGASP2013	PRJEB9227	ERR1514809	SAMEA3432432	No data	S	No data	R	0.38	S	0.016	S	0.004	S	0.006	S	No data	I	8465	4864	18	11986	126	142	67	156	150	153	65	new	14.001	1	100	1	100	2	new	-	-	-	-	-	rpsJ_V57M	-	-	-
ECDC_GR13047	2013	Greece	GR13047	EuroGASP2013	PRJEB9227	ERR1514817	SAMEA3432440	No data	S	No data	R	0.19	S	0.016	S	0.003	S	0.006	S	No data	I	8465	4864	18	11986	126	142	67	156	150	153	65	new	14.001	1	100	1	100	2	new	-	-	-	-	-	rpsJ_V57M	-	-	-
ECDC_GR13049	2013	Greece	GR13049	EuroGASP2013	PRJEB9227	ERR1514819	SAMEA3432442	No data	S	No data	R	0.5	S	0.047	S	0.047	S	32	R	No data	I	225	4	4	1901	109	39	170	111	148	153	65	177	12.004	1	8	1	1	3	100	-	-	-	-	-	rpsJ_V57M	-	porB1b_G120K	porB1b_A121D
ECDC_GR13054	2013	Greece	GR13054	EuroGASP2013	PRJEB9227	ERR1514824	SAMEA3432447	No data	S	No data	R	0.125	S	0.023	S	0.016	S	12	R	No data	I	11057	6443	137	1588	59	39	67	158	148	71	65	247	19.001	38	12	1	7	15	100	-	-	-	-	tetM	rpsJ_V57M	-	porB1b_G120K	-
ECDC_GR13055	2013	Greece	GR13055	EuroGASP2013	PRJEB9227	ERR1514825	SAMEA3432448	No data	S	No data	R	0.38	S	0.032	S	0.023	S	32	R	No data	I	225	4	4	1901	109	39	170	111	148	153	65	177	12.004	1	8	1	1	3	100	-	-	-	-	-	rpsJ_V57M	-	porB1b_G120K	porB1b_A121D
ECDC_GR13058	2013	Greece	GR13058	EuroGASP2013	PRJEB9227	ERR1514828	SAMEA3432451	No data	S	No data	I	0.5	S	0.016	S	0.008	S	0.006	S	No data	I	2992	1808	29	9363	126	39	67	238	148	153	133	new	2.001	9	1	100	100	100	new	-	-	-	-	-	rpsJ_V57M	-	-	-
ECDC_GR13059	2013	Greece	GR13059	EuroGASP2013	PRJEB9227	ERR1514829	SAMEA3432452	No data	S	No data	R	0.25	S	0.016	S	0.006	S	0.006	S	No data	I	8465	4864	18	11986	126	142	67	156	150	153	65	new	14.001	1	100	1	100	2	new	-	-	-	-	-	rpsJ_V57M	-	-	-
ECDC_GR13068	2013	Greece	GR13068	EuroGASP2013	PRJEB9227	ERR1528316	SAMEA3431774	No data	S	No data	R	0.5	S	0.023	S	0.032	S	32	R	No data	I	225	4	4	1901	109	39	170	111	148	153	65	177	12.004	1	8	1	1	3	100	-	-	-	-	-	rpsJ_V57M	-	porB1b_G120K	porB1b_A121D
ECDC_GR13071	2013	Greece	GR13071	EuroGASP2013	PRJEB9227	ERR1528319	SAMEA3431779	No data	S	No data	R	0.38	S	0.016	S	0.006	S	0.006	S	No data	I	8465	4864	18	11986	126	142	67	156	150	153	65	new	14.001	1	100	1	100	2	new	-	-	-	-	-	rpsJ_V57M	-	-	-
ECDC_GR13073	2013	Greece	GR13073	EuroGASP2013	PRJEB9227	ERR1528321	SAMEA3431784	No data	S	No data	R	0.75	S	0.047	S	0.094	S	32	R	No data	I	225	4	4	1901	109	39	170	111	148	153	65	177	12.004	1	8	1	1	3	100	-	-	-	-	-	rpsJ_V57M	-	porB1b_G120K	porB1b_A121D
ECDC_GR18_006	2018	Greece	Not stated	EuroGASP2018	PRJEB34068	ERR9837614	SAMEA5958323	No data	S	No data	R	0.094	S	<0,016	S	<0,002	S	4	R	No data	I	new	new	110	6717	109	39	170	78	149	153	65	3706	69.001	54	14	100	1	3	100	-	-	-	-	tetM	rpsJ_V57M	-	-	-
ECDC_GR18_012	2018	Greece	Not stated	EuroGASP2018	PRJEB34068	ERR9837632	SAMEA5785114	No data	S	No data	I	0.064	S	<0,016	S	0.003	S	<0,002	S	No data	I	12626	5860	29	11999	126	39	67	111	148	783	133	3567	2.001	9	100	1	100	100	100	-	-	-	-	-	rpsJ_V57M	-	-	-
ECDC_GR18_027	2018	Greece	Not stated	EuroGASP2018	PRJEB34068	ERR9837377	SAMEA5958340	No data	S	No data	R	0.064	S	<0,016	S	0.003	S	4	R	No data	R	new	7738	new	7363	59	39	67	78	148	153	65	2537	2.002	89	100	100	7	26	100	-	-	-	blaTEM	tetM	rpsJ_V57M	-	-	-
ECDC_GR18_030	2018	Greece	Not stated	EuroGASP2018	PRJEB34068	ERR9837389	SAMEA5958343	No data	S	No data	R	0.032	S	<0,016	S	<0,002	S	2	R	No data	I	new	new	new	1582	59	39	170	78	148	154	65	3594	2.002	48	19	100	7	18	100	-	-	-	-	tetM	rpsJ_V57M	-	-	-
ECDC_GR18_035	2018	Greece	Not stated	EuroGASP2018	PRJEB34068	ERR9837753	SAMEA5958348	No data	S	No data	R	0.19	S	0.047	S	0.023	S	6	R	No data	R	new	6536	4	7827	59	39	67	158	148	153	65	38	13.001	19	8	1	1	9	100	-	-	-	-	-	rpsJ_V57M	-	porB1b_G120K	porB1b_A121D
ECDC_GR18_038	2018	Greece	Not stated	EuroGASP2018	PRJEB34068	ERR9837765	SAMEA5958351	No data	S	No data	R	0.094	S	<0,016	S	0.003	S	4	R	No data	R	new	7738	new	7363	59	39	67	78	148	153	65	2537	2.002	89	100	100	7	26	100	-	-	-	blaTEM	tetM	rpsJ_V57M	-	-	-
ECDC_GR18_041	2018	Greece	Not stated	EuroGASP2018	PRJEB34068	ERR9837776	SAMEA5958354	No data	S	No data	R	0.125	S	<0,016	S	0.004	S	4	R	No data	R	new	7738	new	7363	59	39	67	78	148	153	65	2537	2.002	89	100	100	7	26	100	-	-	-	blaTEM	tetM	rpsJ_V57M	-	-	-
ECDC_GR18_045	2018	Greece	Not stated	EuroGASP2018	PRJEB34068	ERR9837406	SAMEA5958358	No data	S	No data	R	0.032	S	<0,016	S	0.003	S	3	R	No data	R	new	7738	new	7363	59	39	67	78	148	153	65	2537	2.002	89	100	100	7	26	100	-	-	-	blaTEM	tetM	rpsJ_V57M	-	-	-
ECDC_GR18_047	2018	Greece	Not stated	EuroGASP2018	PRJEB34068	ERR9837789	SAMEA5958379	No data	S	No data	R	0.125	S	0.032	S	0.016	S	>32	R	No data	I	225	4	4	1901	109	39	170	111	148	153	65	177	12.004	1	8	1	1	3	100	-	-	-	-	-	rpsJ_V57M	-	porB1b_G120K	porB1b_A121D
ECDC_GR18_054	2018	Greece	Not stated	EuroGASP2018	PRJEB34068	ERR9837419	SAMEA5958389	No data	S	No data	R	0.125	S	0.016	S	0.008	S	16	R	No data	I	880	489	4	1901	109	39	170	111	148	153	65	3630	12.004	1	12	1	1	3	100	-	-	-	-	-	rpsJ_V57M	-	porB1b_G120K	-
ECDC_GR18_056	2018	Greece	Not stated	EuroGASP2018	PRJEB34068	ERR9837427	SAMEA5785118	No data	S	No data	I	0.064	S	<0,016	S	0.004	S	3	R	No data	R	new	7738	new	7363	59	39	67	78	148	153	65	2537	2.002	89	100	100	7	26	100	-	-	-	blaTEM	-	rpsJ_V57M	-	-	-
ECDC_GR18_057	2018	Greece	Not stated	EuroGASP2018	PRJEB34068	ERR9837431	SAMEA5785116	No data	S	No data	R	0.19	S	0.016	S	0.008	S	>32	R	No data	I	225	4	4	1901	109	39	170	111	148	153	65	177	12.004	1	8	1	1	3	100	-	-	-	-	-	rpsJ_V57M	-	porB1b_G120K	porB1b_A121D
ECDC_GR18_069	2018	Greece	Not stated	EuroGASP2018	PRJEB34068	ERR9837480	SAMEA5958400	No data	S	No data	I	0.032	R	<0,016	S	0.003	S	2	R	No data	I	12302	908	267	9363	126	39	67	238	148	153	133	168	2.001	39	11	100	7	4	100	-	-	-	-	-	rpsJ_V57M	-	porB1b_G120K	-
ECDC_GR18_070	2018	Greece	Not stated	EuroGASP2018	PRJEB34068	ERR9837483	SAMEA5958401	No data	S	No data	R	0.38	S	0.047	S	0.023	S	4	R	No data	I	new	new	4	7827	59	39	67	158	148	153	65	1225	13.001	19	3	1	1	9	100	-	-	-	-	-	rpsJ_V57M	-	-	-
ECDC_GR18_071	2018	Greece	Not stated	EuroGASP2018	PRJEB34068	ERR9837487	SAMEA5958402	No data	S	No data	R	0.19	S	0.064	S	0.023	S	3	R	No data	R	new	new	4	7827	59	39	67	158	148	153	65	3634	13.001	19	21	1	1	9	100	-	-	-	-	-	rpsJ_V57M	-	-	porB1b_A121D
ECDC_GR18_074	2018	Greece	Not stated	EuroGASP2018	PRJEB34068	ERR9837496	SAMEA5958405	No data	S	No data	I	24	R	0.023	S	0.008	S	0.008	S	No data	I	8241	4953	29	9363	126	39	67	238	148	153	133	417	2.001	39	11	100	100	100	2	-	-	23S_rDNA_c2597t	-	-	rpsJ_V57M	-	porB1b_G120K	-
ECDC_HR18_1_3089	2018	Croatia	Not stated	EuroGASP2018	PRJEB34068	ERR9837846	SAMEA5959104	No data	S	No data	R	0.5	S	0.094	S	0.064	S	6	R	No data	R	2318	1053	4	7827	59	39	67	158	148	153	65	38	13.001	19	8	1	1	9	100	-	-	-	-	-	rpsJ_V57M	-	porB1b_G120K	porB1b_A121D
ECDC_HR18_2_9627	2018	Croatia	Not stated	EuroGASP2018	PRJEB34068	ERR9837849	SAMEA5959105	No data	S	No data	I	2	R	<0,016	S	0.006	S	>32	R	No data	I	3935	908	29	11422	109	39	67	238	148	153	133	new	2.001	39	11	100	1	3	new	-	-	-	-	-	rpsJ_V57M	-	porB1b_G120K	-
ECDC_HR18_5_2362	2018	Croatia	Not stated	EuroGASP2018	PRJEB34068	ERR9837853	SAMEA5959108	No data	S	No data	I	1.5	R	<0,016	S	0.006	S	6	R	No data	I	new	new	267	9363	126	39	67	238	148	153	133	168	2.001	39	11	100	7	4	100	-	-	-	-	-	rpsJ_V57M	-	porB1b_G120K	-
ECDC_HR18_6_14484	2018	Croatia	Not stated	EuroGASP2018	PRJEB34068	ERR9837855	SAMEA5959109	No data	S	No data	I	1.5	R	<0,016	S	0.006	S	>32	R	No data	I	3935	908	29	11422	109	39	67	238	148	153	133	new	2.001	39	11	100	1	3	new	-	-	-	-	-	rpsJ_V57M	-	porB1b_G120K	-
ECDC_HR18_9_20138	2018	Croatia	Not stated	EuroGASP2018	PRJEB34068	ERR9837865	SAMEA5959112	No data	S	No data	I	3	R	<0,016	S	0.004	S	>32	R	No data	I	3935	908	29	11422	109	39	67	238	148	153	133	new	2.001	39	11	100	1	3	new	-	-	-	-	-	rpsJ_V57M	-	porB1b_G120K	-
ECDC_HU13_047	2013	Hungary	HU13_047	EuroGASP2013	PRJEB9227	ERR1514724	SAMEA3431742	No data	S	No data	R	No data	S	0.016	S	0.012	S	No data	R	No data	R	11045	6447	137	11995	59	39	67	158	767	153	65	877	19.001	38	100	1	7	55	100	-	-	-	blaTEM	tetM	rpsJ_V57M	rplD_G70D	-	-
ECDC_HU13_052	2013	Hungary	HU13_052	EuroGASP2013	PRJEB9227	ERR1514716	SAMEA3431734	No data	S	No data	I	No data	S	0.016	S	0.012	S	No data	S	No data	I	995	28	29	11999	126	39	67	111	148	783	133	245	2.001	9	3	1	100	100	100	-	-	-	-	-	rpsJ_V57M	-	-	-
ECDC_HU13_053	2013	Hungary	HU13_053	EuroGASP2013	PRJEB9227	ERR1514711	SAMEA3431729	No data	S	No data	I	No data	S	0.016	S	0.008	S	No data	S	No data	I	995	28	29	11999	126	39	67	111	148	783	133	245	2.001	9	3	1	100	100	100	-	-	-	-	-	rpsJ_V57M	-	-	-
ECDC_HU13_064	2013	Hungary	HU13_064	EuroGASP2013	PRJEB9227	ERR1514704	SAMEA3431722	No data	S	No data	I	No data	S	0.016	S	0.016	S	No data	S	No data	I	995	28	29	11999	126	39	67	111	148	783	133	245	2.001	9	3	1	100	100	100	-	-	-	-	-	rpsJ_V57M	-	-	-
ECDC_HU13_066	2013	Hungary	HU13_066	EuroGASP2013	PRJEB9227	ERR1528216	SAMEA3431934	No data	S	No data	I	No data	S	0.032	S	0.023	S	No data	S	No data	I	995	28	29	11999	126	39	67	111	148	783	133	245	2.001	9	3	1	100	100	100	-	-	-	-	-	rpsJ_V57M	-	-	-
ECDC_HU13_068	2013	Hungary	HU13_068	EuroGASP2013	PRJEB9227	ERR1514702	SAMEA3431719	No data	S	No data	I	No data	S	0.016	S	0.012	S	No data	S	No data	I	995	28	29	11999	126	39	67	111	148	783	133	245	2.001	9	3	1	100	100	100	-	-	-	-	-	rpsJ_V57M	-	-	-
ECDC_HU13_077	2013	Hungary	HU13_077	EuroGASP2013	PRJEB9227	ERR1514696	SAMEA3431712	No data	S	No data	I	No data	S	0.016	S	0.016	S	No data	S	No data	I	11077	2	1926	9363	126	39	67	238	148	153	133	new	2.001	9	100	100	100	100	new	-	-	-	-	-	rpsJ_V57M	-	-	-
ECDC_HU13_095	2013	Hungary	HU13_095	EuroGASP2013	PRJEB9227	ERR1680303	SAMEA3431696	No data	S	No data	I	No data	S	0.016	S	0.012	S	No data	S	No data	I	995	28	29	11999	126	39	67	111	148	783	133	245	2.001	9	3	1	100	100	100	-	-	-	-	-	rpsJ_V57M	-	-	-
ECDC_HU18_004	2018	Hungary	Not stated	EuroGASP2018	PRJEB34068	ERR9838706	SAMEA5959041	No data	S	No data	R	0.094	S	<0,016	S	0.008	S	0.5	R	No data	R	15589	7738	1971	1583	59	39	67	111	148	153	65	1340	43.002	122	100	100	7	6	100	-	-	-	blaTEM	tetM	rpsJ_V57M	-	-	-
ECDC_HU18_013	2018	Hungary	Not stated	EuroGASP2018	PRJEB34068	ERR9838714	SAMEA5959046	No data	S	No data	I	0.032	S	<0,016	S	0.003	S	0.002	S	No data	I	800	535	4	11999	126	39	67	111	148	783	133	245	2.001	9	3	1	100	100	100	-	-	-	-	-	rpsJ_V57M	-	-	-
ECDC_HU18_021	2018	Hungary	Not stated	EuroGASP2018	PRJEB34068	ERR9838719	SAMEA5959054	No data	S	No data	I	0.19	S	<0,016	S	0.004	S	0.002	S	No data	I	800	535	4	11999	126	39	67	111	148	783	133	245	2.001	9	3	1	100	100	100	-	-	-	-	-	rpsJ_V57M	-	-	-
ECDC_HU18_023	2018	Hungary	Not stated	EuroGASP2018	PRJEB34068	ERR9838724	SAMEA5959056	No data	S	No data	I	0.125	S	<0,016	S	0.002	S	0.002	S	No data	I	new	new	16	11975	59	39	762	111	188	71	223	84	22.001	15	100	100	100	7	100	-	-	-	-	-	rpsJ_V57M	-	-	-
ECDC_HU18_043	2018	Hungary	Not stated	EuroGASP2018	PRJEB34068	ERR9838959	SAMEA5959076	No data	S	No data	I	0.25	S	<0,016	S	0.002	S	2	R	No data	I	new	535	953	11968	59	39	170	111	146	154	65	1938	2.002	40	3	100	7	4	100	-	-	-	-	-	rpsJ_V57M	-	-	-
ECDC_HU18_044	2018	Hungary	Not stated	EuroGASP2018	PRJEB34068	ERR9838048	SAMEA5959077	No data	S	No data	I	0.25	S	<0,016	S	0.003	S	1.5	R	No data	I	new	535	953	11968	59	39	170	111	146	154	65	1938	2.002	40	3	100	7	4	100	-	-	-	-	-	rpsJ_V57M	-	-	-
ECDC_HU18_045	2018	Hungary	Not stated	EuroGASP2018	PRJEB34068	ERR9838733	SAMEA5959078	No data	S	No data	R	0.25	S	<0,016	S	0.003	S	1.5	R	No data	I	387	266	118	8143	59	39	170	78	146	154	65	427	2.002	40	100	100	7	4	100	-	-	-	-	tetM	rpsJ_V57M	-	-	-
ECDC_HU18_049	2018	Hungary	Not stated	EuroGASP2018	PRJEB34068	ERR9838737	SAMEA5959082	No data	S	No data	I	0.25	S	<0,016	S	0.003	S	0.002	S	No data	I	7266	4339	29	9363	126	39	67	238	148	153	133	new	2.001	9	1	100	100	100	new	-	-	-	-	-	rpsJ_V57M	-	-	-
ECDC_HU18_063	2018	Hungary	Not stated	EuroGASP2018	PRJEB34068	ERR9837886	SAMEA5959123	No data	S	No data	R	0.19	S	0.032	S	0.016	S	0.38	R	No data	R	14769	55	1971	1583	59	39	67	111	148	153	65	539	43.002	122	1	100	7	6	100	-	-	-	blaTEM	tetM	rpsJ_V57M	-	-	-
ECDC_HU18_065	2018	Hungary	Not stated	EuroGASP2018	PRJEB34068	ERR9837665	SAMEA5959125	No data	S	No data	I	0.75	S	0.047	R	0.006	S	0.003	S	No data	I	4244	1808	893	11428	126	39	170	238	734	153	133	454	34.001	9	1	100	100	100	100	-	-	-	-	-	rpsJ_V57M	-	-	-
ECDC_HU18_068	2018	Hungary	Not stated	EuroGASP2018	PRJEB34068	ERR9837899	SAMEA5959128	No data	S	No data	R	0.38	S	0.047	S	0.047	S	8	R	No data	R	10386	246	4	7827	59	39	67	158	148	153	65	38	13.001	19	8	1	1	9	100	-	-	-	-	-	rpsJ_V57M	-	porB1b_G120K	porB1b_A121D
ECDC_HU18_079	2018	Hungary	Not stated	EuroGASP2018	PRJEB34068	ERR9837931	SAMEA5959139	No data	S	No data	R	0.094	S	<0,016	S	0.006	S	1.5	R	No data	I	12176	7122	2056	1587	59	39	67	78	148	153	133	719	2.002	89	100	100	7	4	100	-	-	-	-	tetM	rpsJ_V57M	-	-	-
ECDC_HU18_087	2018	Hungary	Not stated	EuroGASP2018	PRJEB34068	ERR9837948	SAMEA5785183	No data	S	No data	I	0.5	S	<0,016	S	0.003	S	0.003	S	No data	I	2992	1808	29	9362	126	39	67	238	147	153	133	63	2.001	9	1	100	100	100	100	-	-	-	-	-	rpsJ_V57M	-	-	-
ECDC_HU18_090	2018	Hungary	Not stated	EuroGASP2018	PRJEB34068	ERR9837957	SAMEA5959144	No data	S	No data	I	0.032	R	<0,016	S	0.003	S	1	R	No data	I	new	6720	267	9363	126	39	67	238	148	153	133	1513	2.001	39	3	100	7	4	100	-	-	-	-	-	rpsJ_V57M	-	-	-
ECDC_IE18_002	2018	Ireland	Not stated	EuroGASP2018	PRJEB34068	ERR9839317	SAMEA6106678	No data	S	No data	I	2	R	0.016	S	0.008	S	8	R	No data	I	12302	908	267	9363	126	39	67	238	148	153	133	168	2.001	39	11	100	7	4	100	-	-	-	-	-	rpsJ_V57M	-	porB1b_G120K	-
ECDC_IE18_003	2018	Ireland	Not stated	EuroGASP2018	PRJEB34068	ERR9839320	SAMEA6106679	No data	S	No data	R	0.064	S	0.064	S	0.032	S	2	R	No data	R	10386	246	4	7827	59	39	67	158	148	153	65	38	13.001	19	8	1	1	9	100	-	-	-	-	-	rpsJ_V57M	-	porB1b_G120K	porB1b_A121D
ECDC_IE18_005	2018	Ireland	Not stated	EuroGASP2018	PRJEB34068	ERR9838339	SAMEA6106681	No data	S	No data	I	0.5	S	0.032	S	0.004	S	0.002	S	No data	I	new	4739	18	13292	126	39	785	156	148	153	133	439	2.001	9	1	100	100	1	100	-	-	-	-	-	rpsJ_V57M	-	-	-
ECDC_IE18_006	2018	Ireland	Not stated	EuroGASP2018	PRJEB34068	ERR9839326	SAMEA6106683	No data	S	No data	I	0.5	R	<0,016	S	0.002	S	2	R	No data	I	new	new	267	9363	126	39	67	238	148	153	133	1487	2.001	39	1	100	7	4	100	-	-	-	-	-	rpsJ_V57M	-	-	-
ECDC_IE18_007	2018	Ireland	Not stated	EuroGASP2018	PRJEB34068	ERR9838088	SAMEA6106682	No data	S	No data	I	1	R	<0,016	S	0.008	S	8	R	No data	I	12302	908	267	9363	126	39	67	238	148	153	133	168	2.001	39	11	100	7	4	100	-	-	-	-	-	rpsJ_V57M	-	porB1b_G120K	-
ECDC_IE18_010	2018	Ireland	Not stated	EuroGASP2018	PRJEB34068	ERR9838343	SAMEA6106684	No data	S	No data	R	0.125	S	0.032	S	0.016	S	1	R	No data	R	14769	55	1971	1583	59	39	67	111	148	153	65	3543	43.002	122	1	1	7	6	100	-	-	-	blaTEM	tetM	rpsJ_V57M	-	-	-
ECDC_IE18_011	2018	Ireland	Not stated	EuroGASP2018	PRJEB34068	ERR9839331	SAMEA6106685	No data	S	No data	R	0.125	S	0.016	S	0.008	S	0.5	R	No data	R	14769	55	1971	1583	59	39	67	111	148	153	65	3543	43.002	122	1	1	7	6	100	-	-	-	blaTEM	tetM	rpsJ_V57M	-	-	-
ECDC_IE18_014	2018	Ireland	Not stated	EuroGASP2018	PRJEB34068	ERR9838344	SAMEA6106686	No data	S	No data	R	0.125	S	0.032	S	0.012	S	0.5	R	No data	R	14769	55	1971	1583	59	39	67	111	148	153	65	3543	43.002	122	1	1	7	6	100	-	-	-	blaTEM	tetM	rpsJ_V57M	-	-	-
ECDC_IE18_017	2018	Ireland	Not stated	EuroGASP2018	PRJEB34068	ERR9839337	SAMEA6106688	No data	S	No data	R	0.125	S	0.064	S	0.032	S	8	R	No data	R	10386	246	4	7827	59	39	67	158	148	153	65	38	13.001	19	8	1	1	9	100	-	-	-	-	-	rpsJ_V57M	-	porB1b_G120K	porB1b_A121D
ECDC_IE18_018	2018	Ireland	Not stated	EuroGASP2018	PRJEB34068	ERR9838097	SAMEA6105608	No data	S	No data	R	0.125	S	0.032	S	0.016	S	1	R	No data	I	14700	3031	4	13489	59	39	67	158	148	153	918	1225	13.001	19	3	1	1	9	100	-	-	-	-	-	rpsJ_V57M	-	-	-
ECDC_IE18_022	2018	Ireland	Not stated	EuroGASP2018	PRJEB34068	ERR9838102	SAMEA6105609	No data	S	No data	S	4	R	0.032	S	0.008	S	0.008	S	No data	I	13892	8032	29	1580	126	39	67	111	148	153	133	1981	93.001	25	3	100	100	100	1	-	23S_rDNA_a2045g	-	-	-	-	-	-	-
ECDC_IE18_023	2018	Ireland	Not stated	EuroGASP2018	PRJEB34068	ERR9839348	SAMEA6106695	No data	S	No data	R	0.125	S	0.032	S	0.016	S	1	R	No data	R	14769	55	1971	1583	59	39	67	111	148	153	65	3543	43.002	122	1	1	7	6	100	-	-	-	blaTEM	tetM	rpsJ_V57M	-	-	-
ECDC_IE18_026	2018	Ireland	Not stated	EuroGASP2018	PRJEB34068	ERR9839355	SAMEA6106697	No data	S	No data	R	0.5	S	0.064	S	0.032	S	0.5	R	No data	R	14769	55	1971	1583	59	39	67	111	148	153	65	3543	43.002	122	1	1	7	6	100	-	-	-	blaTEM	tetM	rpsJ_V57M	-	-	-
ECDC_IE18_031	2018	Ireland	Not stated	EuroGASP2018	PRJEB34068	ERR9838104	SAMEA6105613	No data	S	No data	R	0.125	S	0.064	S	0.064	S	8	R	No data	R	14051	8111	4	7827	59	39	67	158	148	153	65	38	13.001	19	8	1	1	9	100	-	-	-	-	-	rpsJ_V57M	-	porB1b_G120K	porB1b_A121D
ECDC_IE18_032	2018	Ireland	Not stated	EuroGASP2018	PRJEB34068	ERR9839364	SAMEA6106701	No data	S	No data	I	1	R	<=0,016	S	0.008	S	2	R	No data	I	new	new	267	9363	126	39	67	238	148	153	133	1487	2.001	39	1	100	7	4	100	-	-	-	-	-	rpsJ_V57M	-	-	-
ECDC_IE18_034	2018	Ireland	Not stated	EuroGASP2018	PRJEB34068	ERR9838106	SAMEA6105614	No data	S	No data	I	1	S	<=0,016	S	0.008	S	0.008	S	No data	I	13892	8032	29	1580	126	39	67	111	148	153	133	182	2.001	25	3	100	100	100	100	-	-	-	-	-	rpsJ_V57M	-	-	-
ECDC_IE18_036	2018	Ireland	Not stated	EuroGASP2018	PRJEB34068	ERR9839366	SAMEA6106702	No data	S	No data	I	0.25	S	<=0,016	S	0.008	S	0.002	S	No data	I	new	4739	18	13292	126	39	785	156	148	153	133	439	2.001	9	1	100	100	1	100	-	-	-	-	-	rpsJ_V57M	-	-	-
ECDC_IE18_037	2018	Ireland	Not stated	EuroGASP2018	PRJEB34068	ERR9838350	SAMEA6105615	No data	S	No data	R	0.125	S	0.032	S	0.008	S	0.5	R	No data	R	14769	55	1971	1583	59	39	67	111	148	153	65	3543	43.002	122	1	1	7	6	100	-	-	-	blaTEM	tetM	rpsJ_V57M	-	-	-
ECDC_IE18_043	2018	Ireland	Not stated	EuroGASP2018	PRJEB34068	ERR9839372	SAMEA6106703	No data	S	No data	R	0.125	S	0.032	S	0.016	S	0.5	R	No data	R	14769	55	1971	1583	59	39	67	111	148	153	65	3543	43.002	122	1	1	7	6	100	-	-	-	blaTEM	tetM	rpsJ_V57M	-	-	-
ECDC_IE18_047	2018	Ireland	Not stated	EuroGASP2018	PRJEB34068	ERR9839384	SAMEA6106705	No data	S	No data	R	0.125	S	0.016	S	0.016	S	0.5	R	No data	R	14769	55	1971	1583	59	39	67	111	148	153	65	3543	43.002	122	1	1	7	6	100	-	-	-	blaTEM	tetM	rpsJ_V57M	-	-	-
ECDC_IE18_050	2018	Ireland	Not stated	EuroGASP2018	PRJEB34068	ERR9839387	SAMEA6106710	No data	S	No data	R	0.125	S	0.032	S	0.008	S	0.5	R	No data	R	14769	55	1971	1583	59	39	67	111	148	153	65	3543	43.002	122	1	1	7	6	100	-	-	-	blaTEM	tetM	rpsJ_V57M	-	-	-
ECDC_IE18_057	2018	Ireland	Not stated	EuroGASP2018	PRJEB34068	ERR9838112	SAMEA6105622	No data	S	No data	I	2	R	0.016	S	0.016	S	0.016	S	No data	I	5802	3373	29	9363	126	39	67	238	148	153	133	1034	2.02	39	11	100	100	100	100	-	-	-	-	-	rpsJ_V57M	rplD_G70D	porB1b_G120K	-
ECDC_IE18_058	2018	Ireland	Not stated	EuroGASP2018	PRJEB34068	ERR9838114	SAMEA6105621	No data	S	No data	R	0.125	S	0.064	S	0.064	S	2	R	No data	R	14051	8111	4	7827	59	39	67	158	148	153	65	38	13.001	19	8	1	1	9	100	-	-	-	-	-	rpsJ_V57M	-	porB1b_G120K	porB1b_A121D
ECDC_IE18_059	2018	Ireland	Not stated	EuroGASP2018	PRJEB34068	ERR9838116	SAMEA6105623	No data	S	No data	I	0.125	S	0.016	S	0.004	S	4	R	No data	I	11421	851	953	13266	59	39	170	78	146	530	65	1266	2.002	40	8	100	7	4	100	-	-	-	-	-	rpsJ_V57M	-	porB1b_G120K	porB1b_A121D
ECDC_IE18_064	2018	Ireland	Not stated	EuroGASP2018	PRJEB34068	ERR9838123	SAMEA6105627	No data	S	No data	R	0.125	S	<0,016	S	0.016	S	1	R	No data	R	14769	55	1971	1583	59	39	67	111	148	153	65	3543	43.002	122	1	1	7	6	100	-	-	-	blaTEM	tetM	rpsJ_V57M	-	-	-
ECDC_IE18_065	2018	Ireland	Not stated	EuroGASP2018	PRJEB34068	ERR9838126	SAMEA6105629	No data	S	No data	R	0.125	S	<0,016	S	0.008	S	0.5	R	No data	R	15589	7738	1971	1583	59	39	67	111	148	153	65	1340	43.002	122	100	100	7	6	100	-	-	-	blaTEM	tetM	rpsJ_V57M	-	-	-
ECDC_IE18_071	2018	Ireland	Not stated	EuroGASP2018	PRJEB34068	ERR9837843	SAMEA6105634	No data	S	No data	R	0.125	S	0.064	S	0.064	S	8	R	No data	R	new	new	4	7827	59	39	67	158	148	153	65	38	13.001	19	8	1	1	9	100	-	-	-	-	-	rpsJ_V57M	-	porB1b_G120K	porB1b_A121D
ECDC_IE18_072	2018	Ireland	Not stated	EuroGASP2018	PRJEB34068	ERR9837844	SAMEA6105635	No data	S	No data	R	0.25	S	0.032	S	0.032	S	2	R	No data	I	14700	3031	4	13489	59	39	67	158	148	153	918	1225	13.001	19	3	1	1	9	100	-	-	-	-	-	rpsJ_V57M	-	-	-
ECDC_IE18_073	2018	Ireland	Not stated	EuroGASP2018	PRJEB34068	ERR9838143	SAMEA6105636	No data	S	No data	R	0.125	S	0.064	S	0.064	S	8	R	No data	R	10386	246	4	7827	59	39	67	158	148	153	65	38	13.001	19	8	1	1	9	100	-	-	-	-	-	rpsJ_V57M	-	porB1b_G120K	porB1b_A121D
ECDC_IE18_076	2018	Ireland	Not stated	EuroGASP2018	PRJEB34068	ERR9838149	SAMEA6105641	No data	S	No data	R	0.064	S	0.064	S	0.064	S	4	R	No data	R	10386	246	4	7827	59	39	67	158	148	153	65	38	13.001	19	8	1	1	9	100	-	-	-	-	-	rpsJ_V57M	-	porB1b_G120K	porB1b_A121D
ECDC_IE18_077	2018	Ireland	Not stated	EuroGASP2018	PRJEB34068	ERR9838182	SAMEA6105656	No data	S	No data	I	0.25	S	<0,016	S	0.008	S	0.004	S	No data	I	new	4739	18	13292	126	39	785	156	148	153	133	439	2.001	9	1	100	100	1	100	-	-	-	-	-	rpsJ_V57M	-	-	-
ECDC_IE18_079	2018	Ireland	Not stated	EuroGASP2018	PRJEB34068	ERR9838360	SAMEA6105639	No data	S	No data	I	1.5	R	<0,016	S	0.008	S	8	R	No data	I	new	908	new	9363	126	39	67	238	148	153	133	3609	2.05	39	11	100	7	4	100	-	-	-	-	-	rpsJ_V57M	-	porB1b_G120K	-
ECDC_IE18_086	2018	Ireland	Not stated	EuroGASP2018	PRJEB34068	ERR9838364	SAMEA6105644	No data	S	No data	I	0.25	S	<0,016	S	0.008	S	0.004	S	No data	I	new	4739	18	13292	126	39	785	156	148	153	133	439	2.001	9	1	100	100	1	100	-	-	-	-	-	rpsJ_V57M	-	-	-
ECDC_IE18_087	2018	Ireland	Not stated	EuroGASP2018	PRJEB34068	ERR9838157	SAMEA6105646	No data	S	No data	I	0.25	S	<0,016	S	0.008	S	0.002	S	No data	I	4954	3005	29	8134	126	39	67	157	148	153	133	new	2.001	9	1	100	100	100	new	-	-	-	-	-	rpsJ_V57M	-	-	-
ECDC_IE18_088	2018	Ireland	Not stated	EuroGASP2018	PRJEB34068	ERR9838159	SAMEA6105645	No data	S	No data	R	0.064	S	0.016	S	0.032	S	1	R	No data	I	14700	3031	4	13489	59	39	67	158	148	153	918	1225	13.001	19	3	1	1	9	100	-	-	-	-	-	rpsJ_V57M	-	-	-
ECDC_IE18_090	2018	Ireland	Not stated	EuroGASP2018	PRJEB34068	ERR9838164	SAMEA6105648	No data	S	No data	R	0.125	S	0.016	S	0.016	S	0.5	R	No data	R	14769	55	1971	1583	59	39	67	111	148	153	65	3543	43.002	122	1	1	7	6	100	-	-	-	blaTEM	tetM	rpsJ_V57M	-	-	-
ECDC_IE18_091	2018	Ireland	Not stated	EuroGASP2018	PRJEB34068	ERR9838170	SAMEA6105651	No data	S	No data	R	0.125	S	0.016	S	0.016	S	0.5	R	No data	R	15589	7738	1971	7363	59	39	67	78	148	153	65	1340	43.002	122	100	100	7	6	100	-	-	-	blaTEM	tetM	rpsJ_V57M	-	-	-
ECDC_IE18_092	2018	Ireland	Not stated	EuroGASP2018	PRJEB34068	ERR9838172	SAMEA6105650	No data	S	No data	R	0.125	S	0.032	S	0.032	S	2	R	No data	R	14051	8111	4	7827	59	39	67	158	148	153	65	38	13.001	19	8	1	1	9	100	-	-	-	-	-	rpsJ_V57M	-	porB1b_G120K	porB1b_A121D
ECDC_IE18_095	2018	Ireland	Not stated	EuroGASP2018	PRJEB34068	ERR9838371	SAMEA6105653	No data	S	No data	R	0.125	S	0.032	S	0.016	S	0.5	R	No data	R	14769	55	1971	1583	59	39	67	111	148	153	65	539	43.002	122	1	100	7	6	100	-	-	-	blaTEM	tetM	rpsJ_V57M	-	-	-
ECDC_IE18_096	2018	Ireland	Not stated	EuroGASP2018	PRJEB34068	ERR9838366	SAMEA6106437	No data	S	No data	R	0.25	S	0.016	S	0.016	S	1	R	No data	R	14769	55	1971	1583	59	39	67	111	148	153	65	539	43.002	122	1	100	7	6	100	-	-	-	blaTEM	tetM	rpsJ_V57M	-	-	-
ECDC_IE18_098	2018	Ireland	Not stated	EuroGASP2018	PRJEB34068	ERR9838367	SAMEA6106440	No data	S	No data	R	0.125	S	0.016	S	0.008	S	0.25	R	No data	R	15589	7738	1971	1583	59	39	67	111	148	153	65	1340	43.002	122	100	100	7	6	100	-	-	-	blaTEM	tetM	rpsJ_V57M	-	-	-
ECDC_IE18_099	2018	Ireland	Not stated	EuroGASP2018	PRJEB34068	ERR9838400	SAMEA6105578	No data	S	No data	I	2	R	<0,016	S	0.008	S	8	R	No data	I	12302	908	267	9363	126	39	67	238	148	153	133	168	2.001	39	11	100	7	4	100	-	-	-	-	-	rpsJ_V57M	-	porB1b_G120K	-
ECDC_IE18_100	2018	Ireland	Not stated	EuroGASP2018	PRJEB34068	ERR9837838	SAMEA6105564	No data	S	No data	R	0.25	S	0.032	S	0.064	S	8	R	No data	R	10386	246	4	7827	59	39	67	158	148	153	65	38	13.001	19	8	1	1	9	100	-	-	-	-	-	rpsJ_V57M	-	porB1b_G120K	porB1b_A121D
ECDC_IE18_101	2018	Ireland	Not stated	EuroGASP2018	PRJEB34068	ERR9838524	SAMEA6105855	No data	S	No data	R	0.125	S	<0,016	S	0.016	S	0.5	R	No data	R	14769	55	1971	1583	59	39	67	111	148	153	65	3543	43.002	122	1	1	7	6	100	-	-	-	blaTEM	tetM	rpsJ_V57M	-	-	-
ECDC_IE18_102	2018	Ireland	Not stated	EuroGASP2018	PRJEB34068	ERR9838648	SAMEA6106246	No data	S	No data	R	0.125	S	0.016	S	0.016	S	0.5	R	No data	R	14769	55	1971	1583	59	39	67	111	148	153	65	3543	43.002	122	1	1	7	6	100	-	-	-	blaTEM	tetM	rpsJ_V57M	-	-	-
ECDC_IE18_106	2018	Ireland	Not stated	EuroGASP2018	PRJEB34068	ERR9839270	SAMEA6106267	No data	S	No data	I	0.25	S	<0,016	S	0.008	S	0.002	S	No data	I	new	3104	28	11864	126	39	785	238	148	153	133	439	2.001	9	1	100	100	1	100	-	-	-	-	-	rpsJ_V57M	-	-	-
ECDC_IE18_107	2018	Ireland	Not stated	EuroGASP2018	PRJEB34068	ERR9839307	SAMEA6106672	No data	S	No data	R	0.25	S	0.016	S	0.016	S	0.5	R	No data	R	14769	55	1971	1583	59	39	67	111	148	153	65	3543	43.002	122	1	1	7	6	100	-	-	-	blaTEM	tetM	rpsJ_V57M	-	-	-
ECDC_IE18_108	2018	Ireland	Not stated	EuroGASP2018	PRJEB34068	ERR9839408	SAMEA6106717	No data	S	No data	R	0.25	S	0.032	S	0.032	S	0.5	R	No data	R	14769	55	1971	1583	59	39	67	111	148	153	65	3543	43.002	122	1	1	7	6	100	-	-	-	blaTEM	tetM	rpsJ_V57M	-	-	-
ECDC_IE18_110	2018	Ireland	Not stated	EuroGASP2018	PRJEB34068	ERR9838596	SAMEA6105913	No data	S	No data	I	0.25	S	<0,016	S	0.008	S	4	R	No data	I	12004	30	953	13526	59	39	170	78	146	154	133	3602	2.002	130	1	100	7	3	100	-	-	-	-	-	rpsJ_V57M	-	-	-
ECDC_IE18_113	2018	Ireland	Not stated	EuroGASP2018	PRJEB34068	ERR9839242	SAMEA6106256	No data	S	No data	R	0.25	S	0.016	S	0.016	S	0.5	R	No data	R	14769	55	1971	1583	59	39	67	111	148	153	65	3543	43.002	122	1	1	7	6	100	-	-	-	blaTEM	tetM	rpsJ_V57M	-	-	-
ECDC_IE18_114	2018	Ireland	Not stated	EuroGASP2018	PRJEB34068	ERR9839346	SAMEA6106441	No data	S	No data	R	0.125	S	<=0,016	S	0.008	S	2	R	No data	I	14769	55	1971	1583	59	39	67	111	148	153	65	3543	43.002	122	1	1	7	6	100	-	-	-	-	tetM	rpsJ_V57M	-	-	-
ECDC_IE18_115	2018	Ireland	Not stated	EuroGASP2018	PRJEB34068	ERR9838167	SAMEA6106439	No data	S	No data	S	0.38	S	0.032	S	0.016	S	0.006	S	No data	I	new	new	29	1580	126	39	67	111	148	153	133	new	93.001	25	3	100	100	100	new	-	-	-	-	-	-	-	-	-
ECDC_IE18_116	2018	Ireland	Not stated	EuroGASP2018	PRJEB34068	ERR9838169	SAMEA6106443	No data	S	No data	I	2	R	<0,016	S	0.032	S	16	R	No data	I	new	3175	267	9363	126	39	67	238	148	153	133	new	2.001	39	11	100	7	4	new	-	-	-	-	-	rpsJ_V57M	-	porB1b_G120K	-
ECDC_IE18_118	2018	Ireland	Not stated	EuroGASP2018	PRJEB34068	ERR9839353	SAMEA6106444	No data	S	No data	R	0.125	S	<=0,016	S	0.016	S	0.5	R	No data	R	14769	55	1971	1583	59	39	67	111	148	153	65	3543	43.002	122	1	1	7	6	100	-	-	-	blaTEM	tetM	rpsJ_V57M	-	-	-
ECDC_IE18_119	2018	Ireland	Not stated	EuroGASP2018	PRJEB34068	ERR9839358	SAMEA6106445	No data	S	No data	R	0.125	S	0.016	S	0.016	S	0.5	R	No data	R	14769	55	1971	1583	59	39	67	111	148	153	65	3543	43.002	122	1	1	7	6	100	-	-	-	blaTEM	tetM	rpsJ_V57M	-	-	-
ECDC_IE18_120	2018	Ireland	Not stated	EuroGASP2018	PRJEB34068	ERR9839359	SAMEA6106446	No data	S	No data	I	2	R	<=0,016	S	0.032	S	>=32	R	No data	I	12302	908	267	9363	126	39	67	238	148	153	133	168	2.001	39	11	100	7	4	100	-	-	-	-	-	rpsJ_V57M	-	porB1b_G120K	-
ECDC_IE18_121	2018	Ireland	Not stated	EuroGASP2018	PRJEB34068	ERR9838355	SAMEA6105512	No data	S	No data	I	0.25	S	<=0,016	S	0.016	S	4	R	No data	I	11421	851	953	13266	59	39	170	78	146	530	65	1266	2.002	40	8	100	7	4	100	-	-	-	-	-	rpsJ_V57M	-	porB1b_G120K	porB1b_A121D
ECDC_IE18_124	2018	Ireland	Not stated	EuroGASP2018	PRJEB34068	ERR9838174	SAMEA6106448	No data	S	No data	I	0.25	S	<0,016	S	0.008	S	0.004	S	No data	I	new	4739	18	13292	126	39	785	156	148	153	133	439	2.001	9	1	100	100	1	100	-	-	-	-	-	rpsJ_V57M	-	-	-
ECDC_IE18_126	2018	Ireland	Not stated	EuroGASP2018	PRJEB34068	ERR9838369	SAMEA6106449	No data	S	No data	R	0.25	S	0.032	S	0.064	S	4	R	No data	R	10386	246	4	7827	59	39	67	158	148	153	65	38	13.001	19	8	1	1	9	100	-	-	-	-	-	rpsJ_V57M	-	porB1b_G120K	porB1b_A121D
ECDC_IE18_127	2018	Ireland	Not stated	EuroGASP2018	PRJEB34068	ERR9838179	SAMEA6106450	No data	S	No data	I	0.5	S	<0,016	S	0.008	S	<0,002	S	No data	I	new	4739	18	13292	126	39	785	156	148	153	133	439	2.001	9	1	100	100	1	100	-	-	-	-	-	rpsJ_V57M	-	-	-
ECDC_IE18_130	2018	Ireland	Not stated	EuroGASP2018	PRJEB34068	ERR9839371	SAMEA6106453	No data	S	No data	R	0.125	S	0.016	S	0.016	S	0.5	R	No data	R	14769	55	1971	1583	59	39	67	111	148	153	65	3543	43.002	122	1	1	7	6	100	-	-	-	blaTEM	tetM	rpsJ_V57M	-	-	-
ECDC_IE18_133	2018	Ireland	Not stated	EuroGASP2018	PRJEB34068	ERR9839382	SAMEA6106455	No data	S	No data	I	0.5	R	<0,016	S	0.008	S	1	R	No data	I	new	new	267	9363	126	39	67	238	148	153	133	1487	2.001	39	1	100	7	4	100	-	-	-	-	-	rpsJ_V57M	-	-	-
ECDC_IE18_134	2018	Ireland	Not stated	EuroGASP2018	PRJEB34068	ERR9839383	SAMEA6106456	No data	S	No data	R	0.25	S	0.064	S	0.064	S	2	R	No data	R	14051	8111	4	7827	59	39	67	158	148	153	65	38	13.001	19	8	1	1	9	100	-	-	-	-	-	rpsJ_V57M	-	porB1b_G120K	porB1b_A121D
ECDC_IE18_137	2018	Ireland	Not stated	EuroGASP2018	PRJEB34068	ERR9839394	SAMEA6106459	No data	S	No data	R	0.125	S	0.016	S	0.016	S	0.5	R	No data	R	14769	55	1971	1583	59	39	67	111	148	153	65	3543	43.002	122	1	1	7	6	100	-	-	-	blaTEM	tetM	rpsJ_V57M	-	-	-
ECDC_IE18_138	2018	Ireland	Not stated	EuroGASP2018	PRJEB34068	ERR9839396	SAMEA6106462	No data	S	No data	I	0.5	S	<0,016	S	0.008	S	0.004	S	No data	I	9208	1808	18	13292	126	39	785	156	148	153	133	439	2.001	9	1	100	100	1	100	-	-	-	-	-	rpsJ_V57M	-	-	-
ECDC_IE18_140	2018	Ireland	Not stated	EuroGASP2018	PRJEB34068	ERR9838357	SAMEA6105514	No data	S	No data	I	0.5	S	<0,016	S	0.008	S	0.004	S	No data	I	new	4739	18	13292	126	39	785	156	148	153	133	439	2.001	9	1	100	100	1	100	-	-	-	-	-	rpsJ_V57M	-	-	-
ECDC_IE18_144	2018	Ireland	Not stated	EuroGASP2018	PRJEB34068	ERR9838117	SAMEA6105513	No data	S	No data	I	0.25	S	<=0,016	S	0.004	S	0.004	S	No data	I	9208	1808	18	13292	126	39	785	156	148	153	133	439	2.001	9	1	100	100	1	100	-	-	-	-	-	rpsJ_V57M	-	-	-
ECDC_IE18_145	2018	Ireland	Not stated	EuroGASP2018	PRJEB34068	ERR9837724	SAMEA6105515	No data	S	No data	R	0.25	S	0.064	S	0.032	S	2	R	No data	I	14700	3031	4	7827	59	39	67	158	148	153	65	1225	13.001	19	3	1	1	9	100	-	-	-	-	-	rpsJ_V57M	-	-	-
ECDC_IE18_149	2018	Ireland	Not stated	EuroGASP2018	PRJEB34068	ERR9838122	SAMEA6105519	No data	S	No data	R	0.125	S	0.016	S	0.016	S	0.5	R	No data	R	14769	55	1971	1583	59	39	67	111	148	153	65	3543	43.002	122	1	1	7	6	100	-	-	-	blaTEM	tetM	rpsJ_V57M	-	-	-
ECDC_IE18_150	2018	Ireland	Not stated	EuroGASP2018	PRJEB34068	ERR9838124	SAMEA6105520	No data	S	No data	R	0.25	S	0.032	S	0.064	S	4	R	No data	R	10386	246	4	7827	59	39	67	158	148	153	65	38	13.001	19	8	1	1	9	100	-	-	-	-	-	rpsJ_V57M	-	porB1b_G120K	porB1b_A121D
ECDC_IE18_151	2018	Ireland	Not stated	EuroGASP2018	PRJEB34068	ERR9838127	SAMEA6105521	No data	S	No data	R	0.125	S	0.032	S	0.064	S	4	R	No data	R	10386	246	4	7827	59	39	67	158	148	153	65	38	13.001	19	8	1	1	9	100	-	-	-	-	-	rpsJ_V57M	-	porB1b_G120K	porB1b_A121D
ECDC_IE18_153	2018	Ireland	Not stated	EuroGASP2018	PRJEB34068	ERR9838132	SAMEA6105522	No data	S	No data	I	0.25	S	<0,016	S	0.004	S	2	R	No data	I	621	90	18	8143	59	39	170	78	146	154	65	426	2.002	40	13	100	7	4	100	-	-	-	-	-	rpsJ_V57M	-	-	-
ECDC_IE18_156	2018	Ireland	Not stated	EuroGASP2018	PRJEB34068	ERR9837729	SAMEA6105526	No data	S	No data	R	0.25	S	0.032	S	0.064	S	1	R	No data	R	10386	246	4	7827	59	39	67	158	148	153	65	38	13.001	19	8	1	1	9	100	-	-	-	-	-	rpsJ_V57M	-	porB1b_G120K	porB1b_A121D
ECDC_IE18_157	2018	Ireland	Not stated	EuroGASP2018	PRJEB34068	ERR9838396	SAMEA6106530	No data	S	No data	I	1	R	<0,016	S	0.016	S	4	R	No data	I	12302	908	267	9363	126	39	67	238	148	153	133	168	2.001	39	11	100	7	4	100	-	-	-	-	-	rpsJ_V57M	-	porB1b_G120K	-
ECDC_IE18_158	2018	Ireland	Not stated	EuroGASP2018	PRJEB34068	ERR9837730	SAMEA6105524	No data	S	No data	I	0.125	S	<0,016	S	0.016	S	4	R	No data	I	11421	851	953	13266	59	39	170	78	146	530	65	1266	2.002	40	8	100	7	4	100	-	-	-	-	-	rpsJ_V57M	-	porB1b_G120K	porB1b_A121D
ECDC_IE18_161	2018	Ireland	Not stated	EuroGASP2018	PRJEB34068	ERR9837651	SAMEA6105529	No data	S	No data	R	0.125	S	0.016	S	0.064	S	4	R	No data	R	10386	246	4	7827	59	39	67	158	148	153	65	38	13.001	19	8	1	1	9	100	-	-	-	-	-	rpsJ_V57M	-	porB1b_G120K	porB1b_A121D
ECDC_IE18_162	2018	Ireland	Not stated	EuroGASP2018	PRJEB34068	ERR9838358	SAMEA6105527	No data	S	No data	R	0.125	S	0.016	S	0.016	S	0.5	R	No data	R	14769	55	1971	1583	59	39	67	111	148	153	65	3543	43.002	122	1	1	7	6	100	-	-	-	blaTEM	tetM	rpsJ_V57M	-	-	-
ECDC_IE18_167	2018	Ireland	Not stated	EuroGASP2018	PRJEB34068	ERR9838154	SAMEA6105533	No data	S	No data	R	0.125	S	<0,016	S	0.016	S	0.5	R	No data	R	14769	55	1971	1583	59	39	67	111	148	153	65	3543	43.002	122	1	1	7	6	100	-	-	-	blaTEM	tetM	rpsJ_V57M	-	-	-
ECDC_IE18_169	2018	Ireland	Not stated	EuroGASP2018	PRJEB34068	ERR9838156	SAMEA6105537	No data	S	No data	R	0.125	S	0.016	S	0.016	S	0.5	R	No data	R	14769	55	1971	1583	59	39	67	111	148	153	65	3543	43.002	122	1	1	7	6	100	-	-	-	blaTEM	tetM	rpsJ_V57M	-	-	-
ECDC_IE18_170	2018	Ireland	Not stated	EuroGASP2018	PRJEB34068	ERR9838158	SAMEA6105534	No data	S	No data	R	0.125	S	<0,016	S	0.016	S	0.5	R	No data	R	14769	55	1971	1583	59	39	67	111	148	153	65	3543	43.002	122	1	1	7	6	100	-	-	-	blaTEM	tetM	rpsJ_V57M	-	-	-
ECDC_IE18_178	2018	Ireland	Not stated	EuroGASP2018	PRJEB34068	ERR9838372	SAMEA6105542	No data	S	No data	R	0.5	S	0.032	S	0.016	S	1	R	No data	I	14700	3031	4	13489	59	39	67	158	148	153	918	1225	13.001	19	3	1	1	9	100	-	-	-	-	-	rpsJ_V57M	-	-	-
ECDC_IE18_179	2018	Ireland	Not stated	EuroGASP2018	PRJEB34068	ERR9839265	SAMEA6106534	No data	S	No data	R	0.125	S	0.016	S	0.008	S	0.5	R	No data	R	14769	55	1971	1583	59	39	67	111	148	153	65	3543	43.002	122	1	1	7	6	100	-	-	-	blaTEM	tetM	rpsJ_V57M	-	-	-
ECDC_IE18_180	2018	Ireland	Not stated	EuroGASP2018	PRJEB34068	ERR9838183	SAMEA6105544	No data	S	No data	R	0.125	S	0.032	S	0.016	S	1	R	No data	I	14700	3031	4	7827	59	39	67	158	148	153	65	3639	13.007	19	3	1	1	9	100	-	-	-	-	-	rpsJ_V57M	-	-	-
ECDC_IE18_185	2018	Ireland	Not stated	EuroGASP2018	PRJEB34068	ERR9839403	SAMEA6106464	No data	S	No data	I	1	R	<0,016	S	0.008	S	0.004	S	No data	I	7651	263	29	1580	126	39	67	111	148	153	133	3582	2.001	413	1	100	100	100	100	-	-	-	-	-	rpsJ_V57M	-	-	-
ECDC_IE18_188	2018	Ireland	Not stated	EuroGASP2018	PRJEB34068	ERR9838378	SAMEA6105549	No data	S	No data	R	0.125	S	0.016	S	0.016	S	0.25	R	No data	R	15589	7738	1971	1583	59	39	67	111	148	153	65	1340	43.002	122	100	100	7	6	100	-	-	-	blaTEM	tetM	rpsJ_V57M	-	-	-
ECDC_IE18_190	2018	Ireland	Not stated	EuroGASP2018	PRJEB34068	ERR9838198	SAMEA6105552	No data	S	No data	R	0.125	S	<0,016	S	0.008	S	2	R	No data	R	14769	55	1971	1583	59	39	67	111	148	153	65	3543	43.002	122	1	1	7	6	100	-	-	-	blaTEM	tetM	rpsJ_V57M	-	-	-
ECDC_IE18_191	2018	Ireland	Not stated	EuroGASP2018	PRJEB34068	ERR9838200	SAMEA6105551	No data	S	No data	R	0.125	S	<0,016	S	0.008	S	0.25	R	No data	R	14769	55	1971	1583	59	39	67	111	148	153	65	3543	43.002	122	1	1	7	6	100	-	-	-	blaTEM	tetM	rpsJ_V57M	-	-	-
ECDC_IE18_192	2018	Ireland	Not stated	EuroGASP2018	PRJEB34068	ERR9838203	SAMEA6105554	No data	S	No data	I	0.125	S	<0,016	S	0.008	S	2	R	No data	I	11421	851	953	13266	59	39	170	78	146	530	65	1266	2.002	40	8	100	7	4	100	-	-	-	-	-	rpsJ_V57M	-	porB1b_G120K	porB1b_A121D
ECDC_IE18_197	2018	Ireland	Not stated	EuroGASP2018	PRJEB34068	ERR9838390	SAMEA6105557	No data	S	No data	R	0.25	S	0.032	S	0.032	S	1	R	No data	I	14700	3031	4	7827	59	39	67	158	148	153	65	1225	13.001	19	3	1	1	9	100	-	-	-	-	-	rpsJ_V57M	-	-	-
ECDC_IE18_198	2018	Ireland	Not stated	EuroGASP2018	PRJEB34068	ERR9839437	SAMEA6106477	No data	S	No data	R	0.25	S	0.032	S	0.016	S	2	R	No data	I	14700	3031	4	7827	59	39	67	158	148	153	65	1225	13.001	19	3	1	1	9	100	-	-	-	-	-	rpsJ_V57M	-	-	-
ECDC_IE18_200	2018	Ireland	Not stated	EuroGASP2018	PRJEB34068	ERR9838211	SAMEA6105559	No data	S	No data	R	0.25	S	0.032	S	0.016	S	0.5	R	No data	R	new	new	1971	1583	59	39	67	111	148	153	65	1340	43.002	122	100	100	7	6	100	-	-	-	blaTEM	tetM	rpsJ_V57M	-	-	-
ECDC_IE18_201	2018	Ireland	Not stated	EuroGASP2018	PRJEB34068	ERR9838212	SAMEA6105561	No data	S	No data	R	0.25	S	0.064	S	0.032	S	2	R	No data	I	14700	3031	4	7827	59	39	67	158	148	153	65	1225	13.001	19	3	1	1	9	100	-	-	-	-	-	rpsJ_V57M	-	-	-
ECDC_IE18_206	2018	Ireland	Not stated	EuroGASP2018	PRJEB34068	ERR9838217	SAMEA6105573	No data	S	No data	R	0.25	S	0.032	S	0.032	S	0.25	R	No data	R	new	246	1971	1583	59	39	67	111	148	153	65	2843	43.002	122	8	100	7	6	100	-	-	-	blaTEM	tetM	rpsJ_V57M	-	porB1b_G120K	porB1b_A121D
ECDC_IS18_S1801100275	2018	Iceland	Not stated	EuroGASP2018	PRJEB34068	ERR9837936	SAMEA6105892	No data	S	No data	I	0.25	S	0.015	S	0.008	S	0.006	S	No data	I	new	new	29	1580	126	39	67	111	148	153	133	182	2.001	25	3	100	100	100	100	-	-	-	-	-	rpsJ_V57M	-	-	-
ECDC_IS18_S1802200099	2018	Iceland	Not stated	EuroGASP2018	PRJEB34068	ERR9837939	SAMEA6105896	No data	S	No data	I	1.5	R	0.016	S	0.008	S	0.008	S	No data	I	3935	908	29	11422	109	39	67	238	148	153	133	193	2.001	39	11	100	100	100	100	-	-	-	-	-	rpsJ_V57M	-	porB1b_G120K	-
ECDC_IS18_S1802220362	2018	Iceland	Not stated	EuroGASP2018	PRJEB34068	ERR9837942	SAMEA6105897	No data	S	No data	I	2	R	0.016	S	0.008	S	0.012	S	No data	I	3935	908	29	11422	109	39	67	238	148	153	133	193	2.001	39	11	100	100	100	100	-	-	-	-	-	rpsJ_V57M	-	porB1b_G120K	-
ECDC_IS18_S1803120149	2018	Iceland	Not stated	EuroGASP2018	PRJEB34068	ERR9837943	SAMEA6105900	No data	S	No data	I	0.016	S	0.094	S	0.003	S	4	R	No data	R	11788	6904	953	8143	59	39	170	78	146	154	65	436	2.002	40	100	100	7	3	100	-	-	-	blaTEM	-	rpsJ_V57M	-	-	-
ECDC_IS18_S1803220157	2018	Iceland	Not stated	EuroGASP2018	PRJEB34068	ERR9837686	SAMEA6105904	No data	S	No data	I	0.19	S	0.016	S	0.002	S	2	R	No data	R	11788	6904	953	8143	59	39	170	78	146	154	65	436	2.002	40	100	100	7	3	100	-	-	-	blaTEM	-	rpsJ_V57M	-	-	-
ECDC_IS18_S1805110322	2018	Iceland	Not stated	EuroGASP2018	PRJEB34068	ERR9837965	SAMEA6105911	No data	S	No data	R	0.094	S	0.016	S	0.003	S	3	R	No data	R	12002	7010	91	1588	59	39	67	158	148	71	65	3673	19.001	47	3	1	7	118	100	-	-	-	blaTEM	tetM	rpsJ_V57M	-	-	-
ECDC_IS18_S1806180220	2018	Iceland	Not stated	EuroGASP2018	PRJEB34068	ERR9837973	SAMEA6105914	No data	S	No data	I	0.25	S	0.016	S	0.002	S	3	R	No data	R	11788	6904	953	8143	59	39	170	78	146	154	65	436	2.002	40	100	100	7	3	100	-	-	-	blaTEM	-	rpsJ_V57M	-	-	-
ECDC_IS18_S1806200287	2018	Iceland	Not stated	EuroGASP2018	PRJEB34068	ERR9837978	SAMEA6105915	No data	S	No data	I	0.125	S	0.016	S	0.003	S	2	R	No data	R	12002	7010	91	1588	59	39	67	158	148	71	65	3673	19.001	47	3	1	7	118	100	-	-	-	blaTEM	-	rpsJ_V57M	-	-	-
ECDC_IS18_S1807050310	2018	Iceland	Not stated	EuroGASP2018	PRJEB34068	ERR9839225	SAMEA6106248	No data	S	No data	I	0.25	S	0.016	S	0.002	S	1.5	R	No data	R	11788	6904	953	8143	59	39	170	78	146	154	65	436	2.002	40	100	100	7	3	100	-	-	-	blaTEM	-	rpsJ_V57M	-	-	-
ECDC_IS18_S1808210154	2018	Iceland	Not stated	EuroGASP2018	PRJEB34068	ERR9837695	SAMEA6105919	No data	S	No data	I	2	R	0.016	S	0.006	S	3	R	No data	I	12302	908	267	9363	126	39	67	238	148	153	133	168	2.001	39	11	100	7	4	100	-	-	-	-	-	rpsJ_V57M	-	porB1b_G120K	-
ECDC_IS18_S1809070049	2018	Iceland	Not stated	EuroGASP2018	PRJEB34068	ERR9837990	SAMEA6105920	No data	S	No data	I	2	R	0.016	S	0.008	S	0.008	S	No data	I	5035	1914	29	9363	126	39	67	238	148	153	133	193	2.001	39	11	100	100	100	100	-	-	-	-	-	rpsJ_V57M	-	porB1b_G120K	-
ECDC_IS18_S1809280261	2018	Iceland	Not stated	EuroGASP2018	PRJEB34068	ERR9838223	SAMEA6105582	No data	S	No data	I	1.5	R	0.016	S	0.012	S	0.012	S	No data	I	3935	908	29	11422	109	39	67	238	148	153	133	193	2.001	39	11	100	100	100	100	-	-	-	-	-	rpsJ_V57M	-	porB1b_G120K	-
ECDC_IS18_S1810080264	2018	Iceland	Not stated	EuroGASP2018	PRJEB34068	ERR9837699	SAMEA6105927	No data	S	No data	I	1.5	R	0.016	S	0.008	S	0.008	S	No data	I	3935	908	29	11422	109	39	67	238	148	153	133	193	2.001	39	11	100	100	100	100	-	-	-	-	-	rpsJ_V57M	-	porB1b_G120K	-
ECDC_IS18_S1810110281	2018	Iceland	Not stated	EuroGASP2018	PRJEB34068	ERR9837701	SAMEA6105928	No data	S	No data	R	0.125	S	0.016	S	0.002	S	0.5	R	No data	R	new	new	110	1588	59	39	67	158	148	71	65	433	19.001	47	3	1	7	17	100	-	-	-	blaTEM	tetM	rpsJ_V57M	-	-	-
ECDC_IS18_S1811230291	2018	Iceland	Not stated	EuroGASP2018	PRJEB34068	ERR9838611	SAMEA6105930	No data	S	No data	I	0.38	S	0.023	S	0.016	S	0.003	S	No data	I	7651	263	29	1580	126	39	67	111	148	153	133	240	2.001	25	1	100	100	100	100	-	-	-	-	-	rpsJ_V57M	-	-	-
ECDC_IS18_S1811290219	2018	Iceland	Not stated	EuroGASP2018	PRJEB34068	ERR9838015	SAMEA6105931	No data	S	No data	I	3	R	0.016	S	0.016	S	0.016	S	No data	I	3935	908	29	11422	109	39	67	238	148	153	133	193	2.001	39	11	100	100	100	100	-	-	-	-	-	rpsJ_V57M	-	porB1b_G120K	-
ECDC_IS18_S1812200339	2018	Iceland	Not stated	EuroGASP2018	PRJEB34068	ERR9838020	SAMEA6105935	No data	S	No data	I	0.25	S	0.016	S	0.012	S	0.25	R	No data	R	225	4	4	1580	126	39	67	111	148	153	133	884	2.001	9	8	100	1	100	100	-	-	-	-	-	rpsJ_V57M	-	porB1b_G120K	porB1b_A121D
ECDC_IT18_4145	2018	Italy	Not stated	EuroGASP2018	PRJEB34068	ERR9837660	SAMEA5959204	No data	S	No data	I	0.38	S	0.032	S	0.004	S	0.023	S	No data	I	new	242	29	8126	126	39	67	78	148	153	133	3702	66.001	25	8	100	100	100	18	-	-	-	-	-	rpsJ_V57M	-	porB1b_G120K	porB1b_A121D
ECDC_IT18_4151	2018	Italy	Not stated	EuroGASP2018	PRJEB34068	ERR9837663	SAMEA5959210	No data	S	No data	R	0.5	S	0.047	S	0.032	S	12	R	No data	R	10386	246	4	7827	59	39	67	158	148	153	65	38	13.001	19	8	1	1	9	100	-	-	-	-	-	rpsJ_V57M	-	porB1b_G120K	porB1b_A121D
ECDC_IT18_4152	2018	Italy	Not stated	EuroGASP2018	PRJEB34068	ERR9837877	SAMEA5959211	No data	S	No data	R	0.5	S	0.064	S	0.032	S	8	R	No data	R	10386	246	4	7827	59	39	67	158	148	153	65	38	13.001	19	8	1	1	9	100	-	-	-	-	-	rpsJ_V57M	-	porB1b_G120K	porB1b_A121D
ECDC_IT18_4154	2018	Italy	Not stated	EuroGASP2018	PRJEB34068	ERR9838764	SAMEA5959213	No data	S	No data	I	2	R	<0,016	S	0.002	S	6	R	No data	I	12302	908	267	9363	126	39	67	238	148	153	133	168	2.001	39	11	100	7	4	100	-	-	-	-	-	rpsJ_V57M	-	porB1b_G120K	-
ECDC_IT18_4157	2018	Italy	Not stated	EuroGASP2018	PRJEB34068	ERR9837883	SAMEA5959216	No data	S	No data	R	0.25	S	0.094	S	0.032	S	6	R	No data	R	10386	246	4	7827	59	39	67	158	148	153	65	38	13.001	19	8	1	1	9	100	-	-	-	-	-	rpsJ_V57M	-	porB1b_G120K	porB1b_A121D
ECDC_IT18_4159	2018	Italy	Not stated	EuroGASP2018	PRJEB34068	ERR9837664	SAMEA5785193	No data	S	No data	I	0.75	S	<0,016	S	<0,002	S	0.002	S	No data	R	2997	866	21	11982	126	39	67	238	148	153	65	883	2.001	9	8	100	100	100	100	-	-	-	-	-	rpsJ_V57M	-	porB1b_G120K	porB1b_A121D
ECDC_IT18_4160	2018	Italy	Not stated	EuroGASP2018	PRJEB34068	ERR9837890	SAMEA5785194	No data	S	No data	R	0.125	S	<0,016	S	0.002	S	12	R	No data	R	new	2019	98	1588	59	39	67	158	148	71	65	3675	19.001	48	13	1	15	20	100	-	-	-	blaTEM	tetM	rpsJ_V57M	-	-	-
ECDC_IT18_4162	2018	Italy	Not stated	EuroGASP2018	PRJEB34068	ERR9837894	SAMEA5785196	No data	S	No data	R	0.38	S	0.094	S	0.032	S	12	R	No data	R	10386	246	4	7827	59	39	67	158	148	153	65	38	13.001	19	8	1	1	9	100	-	-	-	-	-	rpsJ_V57M	-	porB1b_G120K	porB1b_A121D
ECDC_IT18_4164	2018	Italy	Not stated	EuroGASP2018	PRJEB34068	ERR9838770	SAMEA5959219	No data	S	No data	R	0.25	S	0.047	S	0.023	S	8	R	No data	I	new	new	29	7827	59	39	67	158	148	153	65	3635	13.001	19	37	1	7	24	100	-	-	-	-	-	rpsJ_V57M	-	-	-
ECDC_IT18_4165	2018	Italy	Not stated	EuroGASP2018	PRJEB34068	ERR9838771	SAMEA5959220	No data	S	No data	R	0.38	S	0.094	S	0.023	S	4	R	No data	I	14700	3031	4	13489	59	39	67	158	148	153	918	1225	13.001	19	3	1	1	9	100	-	-	-	-	-	rpsJ_V57M	-	-	-
ECDC_IT18_4166	2018	Italy	Not stated	EuroGASP2018	PRJEB34068	ERR9838773	SAMEA5959221	No data	S	No data	R	0.25	S	<0,016	S	<0,002	S	1.5	R	No data	R	new	new	602	1587	59	39	67	78	148	153	133	1661	2.002	89	3	100	7	4	100	-	-	-	blaTEM	tetM	rpsJ_V57M	-	-	-
ECDC_IT18_4168	2018	Italy	Not stated	EuroGASP2018	PRJEB34068	ERR9838777	SAMEA5959223	No data	S	No data	R	0.38	S	<0,016	S	<0,002	S	2	R	No data	I	new	new	602	1587	59	39	67	78	148	153	133	1661	2.002	89	3	100	7	4	100	-	-	-	-	tetM	rpsJ_V57M	-	-	-
ECDC_IT18_4171	2018	Italy	Not stated	EuroGASP2018	PRJEB34068	ERR9837897	SAMEA5959225	No data	S	No data	R	0.5	S	0.032	S	0.016	S	4	R	No data	I	new	new	29	7827	59	39	67	158	148	153	65	3635	13.001	19	37	1	7	24	100	-	-	-	-	-	rpsJ_V57M	-	-	-
ECDC_IT18_4194	2018	Italy	Not stated	EuroGASP2018	PRJEB34068	ERR9838785	SAMEA5959229	No data	S	No data	I	0.75	S	<0,016	S	<0,002	S	0.003	S	No data	I	9208	1808	18	13292	126	39	785	156	148	153	133	439	2.001	9	1	100	100	1	100	-	-	-	-	-	rpsJ_V57M	-	-	-
ECDC_IT18_4200	2018	Italy	Not stated	EuroGASP2018	PRJEB34068	ERR9838790	SAMEA5959236	No data	S	No data	R	0.5	S	0.047	S	0.012	S	4	R	No data	I	14700	3031	4	13489	59	39	67	158	148	153	918	1225	13.001	19	3	1	1	9	100	-	-	-	-	-	rpsJ_V57M	-	-	-
ECDC_IT18_4202	2018	Italy	Not stated	EuroGASP2018	PRJEB34068	ERR9837912	SAMEA5959238	No data	S	No data	I	3	R	0.016	S	0.002	S	6	R	No data	I	new	new	267	9363	126	39	67	238	148	153	133	168	2.001	39	11	100	7	4	100	-	-	-	-	-	rpsJ_V57M	-	porB1b_G120K	-
ECDC_IT18_4203	2018	Italy	Not stated	EuroGASP2018	PRJEB34068	ERR9837916	SAMEA5959239	No data	S	No data	R	0.5	S	0.064	S	0.032	S	8	R	No data	R	10386	246	4	7827	59	39	67	158	148	153	65	38	13.001	19	8	1	1	9	100	-	-	-	-	-	rpsJ_V57M	-	porB1b_G120K	porB1b_A121D
ECDC_IT18_4206	2018	Italy	Not stated	EuroGASP2018	PRJEB34068	ERR9838796	SAMEA5959242	No data	S	No data	R	0.25	S	<0,016	S	<0,002	S	1.5	R	No data	R	new	new	602	1587	59	39	67	78	148	153	133	1661	2.002	89	3	100	7	4	100	-	-	-	blaTEM	tetM	rpsJ_V57M	-	-	-
ECDC_IT18_4207	2018	Italy	Not stated	EuroGASP2018	PRJEB34068	ERR9837919	SAMEA5959243	No data	S	No data	I	0.25	S	0.125	R	0.012	S	16	R	No data	R	new	new	10	7363	59	39	67	78	148	153	65	348	10.001	33	8	1	2	5	100	-	-	-	-	-	rpsJ_V57M	-	porB1b_G120K	porB1b_A121D
ECDC_IT18_4213	2018	Italy	Not stated	EuroGASP2018	PRJEB34068	ERR9837368	SAMEA5785198	No data	S	No data	I	2	R	0.032	S	0.003	S	12	R	No data	I	new	new	267	9363	126	39	67	238	148	153	133	168	2.001	39	11	100	7	4	100	-	-	-	-	-	rpsJ_V57M	-	porB1b_G120K	-
ECDC_IT18_4219	2018	Italy	Not stated	EuroGASP2018	PRJEB34068	ERR9837371	SAMEA5959245	No data	S	No data	I	0.19	S	<0,016	S	<0,002	S	3	R	No data	R	5624	90	953	8143	59	39	170	78	146	154	65	426	2.002	40	13	100	7	4	100	-	-	-	blaTEM	-	rpsJ_V57M	-	-	-
ECDC_IT18_4228	2018	Italy	Not stated	EuroGASP2018	PRJEB34068	ERR9837379	SAMEA5959250	No data	S	No data	R	0.5	S	0.047	S	0.023	S	12	R	No data	R	new	7716	4	7827	59	39	67	158	148	153	65	38	13.001	19	8	1	1	9	100	-	-	-	-	-	rpsJ_V57M	-	porB1b_G120K	porB1b_A121D
ECDC_IT18_4258	2018	Italy	Not stated	EuroGASP2018	PRJEB34068	ERR9837933	SAMEA5959256	No data	S	No data	R	0.38	S	0.016	S	0.004	S	3	R	No data	I	new	new	29	7827	59	39	67	158	148	153	65	3635	13.001	19	37	1	7	24	100	-	-	-	-	-	rpsJ_V57M	-	-	-
ECDC_IT18_4259	2018	Italy	Not stated	EuroGASP2018	PRJEB34068	ERR9837937	SAMEA5959257	No data	S	No data	R	0.5	S	0.032	S	0.012	S	8	R	No data	I	new	new	29	7827	59	39	67	158	148	153	65	3635	13.001	19	37	1	7	24	100	-	-	-	-	-	rpsJ_V57M	-	-	-
ECDC_IT18_4262	2018	Italy	Not stated	EuroGASP2018	PRJEB34068	ERR9837940	SAMEA5959260	No data	S	No data	R	0.38	S	0.032	S	0.016	S	8	R	No data	I	new	new	29	7827	59	39	67	158	148	153	65	3635	13.001	19	37	1	7	24	100	-	-	-	-	-	rpsJ_V57M	-	-	-
ECDC_IT18_4268	2018	Italy	Not stated	EuroGASP2018	PRJEB34068	ERR9837759	SAMEA5959262	No data	S	No data	R	0.25	S	<0,016	S	<0,002	S	1	R	No data	R	new	new	602	1587	59	39	67	78	148	153	133	1661	2.002	89	3	100	7	4	100	-	-	-	blaTEM	tetM	rpsJ_V57M	-	-	-
ECDC_IT18_4270	2018	Italy	Not stated	EuroGASP2018	PRJEB34068	ERR9837399	SAMEA5959264	No data	S	No data	R	0.25	S	<0,016	S	<0,002	S	1	R	No data	R	new	new	602	1587	59	39	67	78	148	153	133	1661	2.002	89	3	100	7	4	100	-	-	-	blaTEM	tetM	rpsJ_V57M	-	-	-
ECDC_IT18_4272	2018	Italy	Not stated	EuroGASP2018	PRJEB34068	ERR9837767	SAMEA5959266	No data	S	No data	I	1.5	S	0.032	S	0.008	S	0.008	S	No data	R	2997	866	21	11982	126	39	67	238	148	153	65	883	2.001	9	8	100	100	100	100	-	-	-	-	-	rpsJ_V57M	-	porB1b_G120K	porB1b_A121D
ECDC_IT18_4274	2018	Italy	Not stated	EuroGASP2018	PRJEB34068	ERR9837687	SAMEA5959268	No data	S	No data	I	1	R	<0,016	S	<0,002	S	6	R	No data	I	new	new	267	9363	126	39	67	238	148	153	133	168	2.001	39	11	100	7	4	100	-	-	-	-	-	rpsJ_V57M	-	porB1b_G120K	-
ECDC_IT18_4276	2018	Italy	Not stated	EuroGASP2018	PRJEB34068	ERR9837951	SAMEA5959269	No data	S	No data	R	1.5	S	0.064	S	0.032	S	>32	R	No data	R	10386	246	4	7827	59	39	67	158	148	153	65	38	13.001	19	8	1	1	9	100	-	-	-	-	-	rpsJ_V57M	-	porB1b_G120K	porB1b_A121D
ECDC_IT18_4284	2018	Italy	Not stated	EuroGASP2018	PRJEB34068	ERR9837783	SAMEA5959272	No data	S	No data	I	1.5	S	<0,016	S	0.003	S	0.012	S	No data	R	new	new	21	11982	126	39	67	238	148	153	65	883	2.001	9	8	100	100	100	100	-	-	-	blaTEM	-	rpsJ_V57M	-	porB1b_G120K	porB1b_A121D
ECDC_IT18_4287	2018	Italy	Not stated	EuroGASP2018	PRJEB34068	ERR9837961	SAMEA5959273	No data	S	No data	I	0.38	S	0.38	R	0.094	S	>32	R	No data	R	13288	4991	10	7363	59	39	67	78	148	153	65	348	10.001	33	8	1	2	5	100	-	-	-	-	-	rpsJ_V57M	-	porB1b_G120K	porB1b_A121D
ECDC_IT18_4288	2018	Italy	Not stated	EuroGASP2018	PRJEB34068	ERR9837691	SAMEA5959286	No data	S	No data	I	0.38	S	0.016	S	0.002	S	3	R	No data	I	new	new	110	11431	59	142	170	78	148	154	65	1284	2.002	54	100	100	7	22	100	-	-	-	-	-	rpsJ_V57M	-	-	-
ECDC_IT18_4292	2018	Italy	Not stated	EuroGASP2018	PRJEB34068	ERR9837968	SAMEA5959310	No data	S	No data	I	0.25	S	<0,016	S	<0,002	S	3	R	No data	I	new	new	110	11431	59	142	170	78	148	154	65	1284	2.002	54	100	100	7	22	100	-	-	-	-	-	rpsJ_V57M	-	-	-
ECDC_IT18_4309	2018	Italy	Not stated	EuroGASP2018	PRJEB34068	ERR9837372	SAMEA5785218	No data	S	No data	R	0.5	S	0.064	S	0.047	S	6	R	No data	R	10569	6176	4	7827	59	39	67	158	148	153	65	38	13.001	19	8	1	1	9	100	-	-	-	-	-	rpsJ_V57M	-	porB1b_G120K	porB1b_A121D
ECDC_IT18_4310	2018	Italy	Not stated	EuroGASP2018	PRJEB34068	ERR9838062	SAMEA5785217	No data	S	No data	I	3	R	<0,016	S	<0,002	S	2	R	No data	I	new	279	267	9363	126	39	67	238	148	153	133	1487	2.001	39	1	100	7	4	100	-	-	-	-	-	rpsJ_V57M	-	-	-
ECDC_IT18_4311	2018	Italy	Not stated	EuroGASP2018	PRJEB34068	ERR9837719	SAMEA5785220	No data	S	No data	I	2	R	0.016	S	0.004	S	4	R	No data	R	new	new	914	8125	126	39	67	111	148	71	133	new	2.001	39	100	100	1	22	new	-	-	-	blaTEM	-	rpsJ_V57M	-	-	-
ECDC_IT18_4313	2018	Italy	Not stated	EuroGASP2018	PRJEB34068	ERR9838065	SAMEA5960310	No data	S	No data	R	0.5	S	0.094	S	0.064	S	8	R	No data	R	10386	246	4	7827	59	39	67	158	148	153	65	38	13.001	19	8	1	1	9	100	-	-	-	-	-	rpsJ_V57M	-	porB1b_G120K	porB1b_A121D
ECDC_IT2926	2013	Italy	IT2926	EuroGASP2013	PRJEB9227	ERR1469641	SAMEA3390230	No data	S	No data	I	0.016	S	0.016	S	0.002	S	0.004	S	No data	I	2992	1808	29	9363	126	39	67	238	148	153	133	63	2.001	9	1	100	100	100	100	-	-	-	-	-	rpsJ_V57M	-	-	-
ECDC_IT2930	2013	Italy	IT2930	EuroGASP2013	PRJEB9227	ERR1469643	SAMEA3390233	No data	S	No data	R	0.016	S	0.016	S	0.008	S	0.012	S	No data	R	10564	6172	6	11961	59	39	67	78	147	71	65	928	4.001	36	8	1	100	2	100	-	-	-	-	-	rpsJ_V57M	-	porB1b_G120K	porB1b_A121D
ECDC_IT2931	2013	Italy	IT2931	EuroGASP2013	PRJEB9227	ERR1469644	SAMEA3390234	No data	S	No data	I	0.016	S	0.016	S	0.002	S	0.006	S	No data	I	2992	1808	29	11428	126	39	170	238	734	153	133	new	2.001	9	1	100	100	100	new	-	-	-	-	-	rpsJ_V57M	-	-	-
ECDC_IT2933	2013	Italy	IT2933	EuroGASP2013	PRJEB9227	ERR1469645	SAMEA3390235	No data	S	No data	I	0.016	S	0.016	S	0.002	S	0.006	S	No data	I	2992	1808	29	9363	126	39	67	238	148	153	133	882	2.001	9	1	100	100	100	6	-	-	-	-	-	rpsJ_V57M	-	-	-
ECDC_IT2934	2013	Italy	IT2934	EuroGASP2013	PRJEB9227	ERR1471147	SAMEA3390236	No data	S	No data	I	0.016	S	0.016	S	0.002	S	0.004	S	No data	I	2992	1808	29	9362	126	39	67	238	147	153	133	new	2.001	9	1	100	100	100	new	-	-	-	-	-	rpsJ_V57M	-	-	-
ECDC_IT2943	2013	Italy	IT2943	EuroGASP2013	PRJEB9227	ERR1471148	SAMEA3390244	No data	S	No data	I	0.032	S	0.016	S	0.004	S	0.003	S	No data	I	2992	1808	29	11428	126	39	170	238	734	153	133	new	2.001	9	1	100	100	100	new	-	-	-	-	-	rpsJ_V57M	-	-	-
ECDC_IT2953	2013	Italy	IT2953	EuroGASP2013	PRJEB9227	ERR1469654	SAMEA3390249	No data	S	No data	I	0.016	S	0.016	S	0.003	S	1	R	No data	I	5624	90	953	8143	59	39	170	78	146	154	65	426	2.002	40	13	100	7	4	100	-	-	-	-	-	rpsJ_V57M	-	-	-
ECDC_IT2955	2013	Italy	IT2955	EuroGASP2013	PRJEB9227	ERR1469656	SAMEA3390251	No data	S	No data	I	0.016	S	0.016	S	0.004	S	0.003	S	No data	I	10563	1808	1865	9362	126	39	67	238	147	153	133	63	2.001	9	1	100	100	100	100	-	-	-	-	-	rpsJ_V57M	-	-	-
ECDC_IT2972	2013	Italy	IT2972	EuroGASP2013	PRJEB9227	ERR1469666	SAMEA3390264	No data	S	No data	I	0.016	S	0.016	S	0.002	S	0.002	S	No data	I	2992	1808	29	9363	126	39	67	238	148	153	133	63	2.001	9	1	100	100	100	100	-	-	-	-	-	rpsJ_V57M	-	-	-
ECDC_IT2974	2013	Italy	IT2974	EuroGASP2013	PRJEB9227	ERR1469667	SAMEA3390265	No data	S	No data	I	0.016	S	0.016	S	0.002	S	0.003	S	No data	I	2992	1808	29	9363	126	39	67	238	148	153	133	882	2.001	9	1	100	100	100	6	-	-	-	-	-	rpsJ_V57M	-	-	-
ECDC_LV13_003	2013	Latvia	LV13-003	EuroGASP2013	PRJEB9227	ERR1549718	SAMEA3468153	No data	S	No data	R	No data	S	0.023	S	0.008	S	No data	R	No data	R	10828	90	833	1588	59	39	67	158	148	71	65	869	19.001	10	13	1	7	26	100	-	-	-	blaTEM	tetM	rpsJ_V57M	-	-	-
ECDC_LV13_012	2013	Latvia	LV13-012	EuroGASP2013	PRJEB9227	ERR1549727	SAMEA3468171	No data	S	No data	R	No data	S	0.023	S	0.012	S	No data	R	No data	R	10828	90	833	1588	59	39	67	158	148	71	65	869	19.001	10	13	1	7	26	100	-	-	-	blaTEM	tetM	rpsJ_V57M	-	-	-
ECDC_LV13_015	2013	Latvia	LV13-015	EuroGASP2013	PRJEB9227	ERR1549730	SAMEA3468177	No data	S	No data	R	No data	S	0.016	S	0.012	S	No data	R	No data	R	10828	90	833	1588	59	39	67	158	148	71	65	869	19.001	10	13	1	7	26	100	-	-	-	blaTEM	tetM	rpsJ_V57M	-	-	-
ECDC_LV13_024	2013	Latvia	LV13-024	EuroGASP2013	PRJEB9227	ERR1549739	SAMEA3468195	No data	S	No data	R	No data	S	0.016	S	0.008	S	No data	R	No data	R	10828	90	833	1588	59	39	67	158	148	71	65	869	19.001	10	13	1	7	26	100	-	-	-	blaTEM	tetM	rpsJ_V57M	-	-	-
ECDC_LV13_026	2013	Latvia	LV13-026	EuroGASP2013	PRJEB9227	ERR1549741	SAMEA3468199	No data	S	No data	I	No data	S	0.016	S	0.008	S	No data	S	No data	I	5119	3104	29	11428	126	39	170	238	734	153	133	new	2.001	9	1	100	100	100	new	-	-	-	-	-	rpsJ_V57M	-	-	-
ECDC_LV13_027	2013	Latvia	LV13-027	EuroGASP2013	PRJEB9227	ERR1549742	SAMEA3468201	No data	S	No data	I	No data	S	0.016	S	0.008	S	No data	S	No data	I	5119	3104	29	11428	126	39	170	238	734	153	133	63	2.001	9	1	100	100	100	100	-	-	-	-	-	rpsJ_V57M	-	-	-
ECDC_LV13_028	2013	Latvia	LV13-028	EuroGASP2013	PRJEB9227	ERR1549743	SAMEA3468203	No data	S	No data	R	No data	S	0.016	S	0.008	S	No data	R	No data	R	10828	90	833	1588	59	39	67	158	148	71	65	869	19.001	10	13	1	7	26	100	-	-	-	blaTEM	tetM	rpsJ_V57M	-	-	-
ECDC_LV18_005	2018	Latvia	Not stated	EuroGASP2018	PRJEB34068	ERR9838425	SAMEA6105700	No data	S	No data	R	0.25	S	0.047	R	0.023	S	1.5	R	No data	R	new	new	602	7363	59	39	67	78	148	153	65	1124	34.007	40	100	100	7	4	100	-	-	-	blaTEM	tetM	rpsJ_V57M	-	-	-
ECDC_MT13_001	2013	Malta	MT13-001	EuroGASP2013	PRJEB9227	ERR1555230	SAMEA3468289	No data	S	No data	I	0.19	S	0.016	S	0.016	S	0.002	S	No data	I	2992	1808	29	11428	126	39	170	238	734	153	133	new	2.001	9	1	100	100	100	new	-	-	-	-	-	rpsJ_V57M	-	-	-
ECDC_MT13_008	2013	Malta	MT13-008	EuroGASP2013	PRJEB9227	ERR1555233	SAMEA3468292	No data	S	No data	I	0.25	S	0.016	S	0.016	S	0.008	S	No data	I	8422	908	18	1893	59	39	67	157	147	153	133	new	9.001	25	11	100	100	2	new	-	-	-	-	-	rpsJ_V57M	-	porB1b_G120K	-
ECDC_MT13_009	2013	Malta	MT13-009	EuroGASP2013	PRJEB9227	ERR1555234	SAMEA3468293	No data	S	No data	I	0.5	S	0.016	S	0.016	S	0.002	S	No data	I	2992	1808	29	11463	126	39	67	238	734	153	133	new	2.001	9	1	100	100	100	new	-	-	-	-	-	rpsJ_V57M	-	-	-
ECDC_MT13_012	2013	Malta	MT13-012	EuroGASP2013	PRJEB9227	ERR1555235	SAMEA3468294	No data	S	No data	I	0.125	S	0.016	S	0.016	S	0.002	S	No data	I	2992	1808	29	11428	126	39	170	238	734	153	133	63	2.001	9	1	100	100	100	100	-	-	-	-	-	rpsJ_V57M	-	-	-
ECDC_MT13_013	2013	Malta	MT13-013	EuroGASP2013	PRJEB9227	ERR1555236	SAMEA3468295	No data	S	No data	I	0.094	S	0.016	S	0.016	S	0.002	S	No data	I	2992	1808	29	11428	126	39	170	238	734	153	133	new	2.001	9	1	100	100	100	new	-	-	-	-	-	rpsJ_V57M	-	-	-
ECDC_MT13_015	2013	Malta	MT13-015	EuroGASP2013	PRJEB9227	ERR1555237	SAMEA3468296	No data	S	No data	I	0.25	S	0.016	S	0.016	S	0.02	S	No data	I	2992	1808	29	9363	126	39	67	238	148	153	133	63	2.001	9	1	100	100	100	100	-	-	-	-	-	rpsJ_V57M	-	-	-
ECDC_MT13_021	2013	Malta	MT13-021	EuroGASP2013	PRJEB9227	ERR1555242	SAMEA3468301	No data	S	No data	I	0.094	S	0.016	S	0.016	S	0.002	S	No data	I	4684	2161	29	11428	126	39	170	238	734	153	133	new	2.001	9	1	100	100	100	new	-	-	-	-	-	rpsJ_V57M	-	-	-
ECDC_MT13_025	2013	Malta	MT13-025	EuroGASP2013	PRJEB9227	ERR1555245	SAMEA3468304	No data	S	No data	I	0.125	S	0.016	S	0.016	S	0.002	S	No data	I	2992	1808	29	11428	126	39	170	238	734	153	133	new	2.001	9	1	100	100	100	new	-	-	-	-	-	rpsJ_V57M	-	-	-
ECDC_MT13_030	2013	Malta	MT13-030	EuroGASP2013	PRJEB9227	ERR1555248	SAMEA3468307	No data	S	No data	I	0.5	S	0.016	S	0.016	S	0.002	S	No data	I	7445	28	24	9363	126	39	67	238	148	153	133	new	2.001	9	3	100	100	100	new	-	-	-	-	-	rpsJ_V57M	-	-	-
ECDC_MT13_031	2013	Malta	MT13-031	EuroGASP2013	PRJEB9227	ERR1555249	SAMEA3468308	No data	S	No data	I	0.25	S	0.016	S	0.016	S	0.002	S	No data	I	2992	1808	29	11428	126	39	170	238	734	153	133	new	2.001	9	1	100	100	100	new	-	-	-	-	-	rpsJ_V57M	-	-	-
ECDC_MT18_004	2018	Malta	Not stated	EuroGASP2018	PRJEB34068	ERR9837380	SAMEA5960329	No data	S	No data	R	0.25	S	0.016	S	0.004	S	>32	R	No data	R	14769	55	1971	1583	59	39	67	111	148	153	65	539	43.002	122	1	100	7	6	100	-	-	-	blaTEM	tetM	rpsJ_V57M	-	-	-
ECDC_MT18_006	2018	Malta	Not stated	EuroGASP2018	PRJEB34068	ERR9837384	SAMEA5960338	No data	S	No data	R	0.25	S	0.016	S	0.064	S	0.5	R	No data	R	new	new	1971	1583	59	39	67	111	148	153	65	1340	43.002	122	100	100	7	6	100	-	-	-	blaTEM	tetM	rpsJ_V57M	-	-	-
ECDC_NL14	2013	Netherlands	NL14	EuroGASP2013	PRJEB9227	ERR1528244	SAMEA3431785	No data	S	No data	I	0.38	S	0.016	S	0.006	S	0.002	S	No data	I	2992	1808	29	9362	126	39	67	238	147	153	133	63	2.001	9	1	100	100	100	100	-	-	-	-	-	rpsJ_V57M	-	-	-
ECDC_NL16	2013	Netherlands	NL16	EuroGASP2013	PRJEB9227	ERR1528246	SAMEA3431790	No data	S	No data	I	0.25	S	0.016	S	0.003	S	0.003	S	No data	I	2992	1808	29	9363	126	39	67	238	148	153	133	new	2.001	9	1	100	100	100	new	-	-	-	-	-	rpsJ_V57M	-	-	-
ECDC_NL18_180903024601	2018	Netherlands	Not stated	EuroGASP2018	PRJEB34068	ERR9837221	SAMEA5958731	No data	S	No data	R	0.19	S	0.064	S	0.094	S	24	R	No data	R	14051	8111	4	7827	59	39	67	158	148	153	65	38	13.001	19	8	1	1	9	100	-	-	-	-	-	rpsJ_V57M	-	porB1b_G120K	porB1b_A121D
ECDC_NL18_180904056401	2018	Netherlands	Not stated	EuroGASP2018	PRJEB34068	ERR9837253	SAMEA5785147	No data	S	No data	R	0.064	S	<0,016	S	0.004	S	0.5	R	No data	R	new	new	2056	1587	59	39	67	78	148	153	133	3599	2.002	89	37	100	7	68	100	-	-	-	blaTEM	tetM	rpsJ_V57M	-	-	-
ECDC_NL18_180906002605	2018	Netherlands	Not stated	EuroGASP2018	PRJEB34068	ERR9837195	SAMEA5958716	No data	S	No data	R	0.125	S	<0,016	S	0.004	S	0.75	R	No data	R	15589	7738	1971	1583	59	39	67	111	148	153	65	3310	2.001	122	100	100	7	6	100	-	-	-	blaTEM	tetM	rpsJ_V57M	-	-	-
ECDC_NL18_180907045601	2018	Netherlands	Not stated	EuroGASP2018	PRJEB34068	ERR9837207	SAMEA5958723	No data	S	No data	R	0.125	S	0.023	S	0.023	S	2	R	No data	I	14700	3031	4	13489	59	39	67	158	148	153	918	1225	13.001	19	3	1	1	9	100	-	-	-	-	-	rpsJ_V57M	-	-	-
ECDC_NL18_180908007502	2018	Netherlands	Not stated	EuroGASP2018	PRJEB34068	ERR9837232	SAMEA5958736	No data	S	No data	I	0.064	S	<0,016	S	0.004	S	0.38	R	No data	I	new	161	new	1588	59	39	67	158	148	71	65	271	19.001	47	14	1	7	17	100	-	-	-	-	-	rpsJ_V57M	-	-	-
ECDC_NL18_180911006101	2018	Netherlands	Not stated	EuroGASP2018	PRJEB34068	ERR9837262	SAMEA5958749	No data	S	No data	I	1	R	<0,016	S	0.006	S	>32	R	No data	I	12302	908	267	9363	126	39	67	238	148	153	133	168	2.001	39	11	100	7	4	100	-	-	-	-	-	rpsJ_V57M	-	porB1b_G120K	-
ECDC_NL18_180913053502	2018	Netherlands	Not stated	EuroGASP2018	PRJEB34068	ERR9837259	SAMEA5958748	No data	S	No data	R	0.094	S	0.016	S	0.008	S	0.25	R	No data	R	new	new	1971	1583	59	39	67	111	148	153	65	539	43.002	122	1	100	7	6	100	-	-	-	blaTEM	tetM	rpsJ_V57M	-	-	-
ECDC_NL18_180914012501	2018	Netherlands	Not stated	EuroGASP2018	PRJEB34068	ERR9837202	SAMEA5958720	No data	S	No data	I	0.032	S	<0,016	S	0.003	S	0.008	S	No data	I	8110	4828	16	8163	59	39	170	111	188	71	223	84	22.001	15	100	100	100	7	100	-	-	-	-	-	rpsJ_V57M	-	-	-
ECDC_NL18_180914048702	2018	Netherlands	Not stated	EuroGASP2018	PRJEB34068	ERR9837226	SAMEA5958733	No data	S	No data	R	0.19	S	0.047	S	0.094	S	>32	R	No data	R	10386	246	4	7827	59	39	67	158	148	153	65	38	13.001	19	8	1	1	9	100	-	-	-	-	-	rpsJ_V57M	-	porB1b_G120K	porB1b_A121D
ECDC_NL18_180915002901	2018	Netherlands	Not stated	EuroGASP2018	PRJEB34068	ERR9837187	SAMEA5958712	No data	S	No data	I	0.094	S	<0,016	S	0.003	S	0.002	S	No data	I	2	2	16	8163	59	39	170	111	188	71	223	84	22.001	15	100	100	100	7	100	-	-	-	-	-	rpsJ_V57M	-	-	-
ECDC_NL18_180917027401	2018	Netherlands	Not stated	EuroGASP2018	PRJEB34068	ERR9837264	SAMEA5958755	No data	S	No data	R	0.125	S	0.016	S	0.012	S	0.75	R	No data	R	15589	7738	1971	1583	59	39	67	111	148	153	65	1340	43.002	122	100	100	7	6	100	-	-	-	blaTEM	tetM	rpsJ_V57M	-	-	-
ECDC_NL18_180918046501	2018	Netherlands	Not stated	EuroGASP2018	PRJEB34068	ERR9838928	SAMEA5958706	No data	S	No data	R	0.125	S	0.016	S	0.008	S	0.38	R	No data	R	15589	7738	1971	1583	59	39	67	111	148	153	65	1340	43.002	122	100	100	7	6	100	-	-	-	blaTEM	tetM	rpsJ_V57M	-	-	-
ECDC_NL18_180920042204	2018	Netherlands	Not stated	EuroGASP2018	PRJEB34068	ERR9837292	SAMEA5958784	No data	S	No data	R	0.125	S	<0,016	S	0.002	S	0.25	R	No data	R	15589	7738	1971	1583	59	39	67	111	148	153	65	3310	2.001	122	100	100	7	6	100	-	-	-	blaTEM	tetM	rpsJ_V57M	-	-	-
ECDC_NL18_180921012201	2018	Netherlands	Not stated	EuroGASP2018	PRJEB34068	ERR9838675	SAMEA5958786	No data	S	No data	I	1.5	R	<0,016	S	0.012	S	16	R	No data	I	12302	908	267	9363	126	39	67	238	148	153	133	168	2.001	39	11	100	7	4	100	-	-	-	-	-	rpsJ_V57M	-	porB1b_G120K	-
ECDC_NL18_180925025002	2018	Netherlands	Not stated	EuroGASP2018	PRJEB34068	ERR9838947	SAMEA5958787	No data	S	No data	R	0.19	S	0.047	S	0.047	S	6	R	No data	R	14051	8111	4	7827	59	39	67	158	148	153	65	38	13.001	19	8	1	1	9	100	-	-	-	-	-	rpsJ_V57M	-	porB1b_G120K	porB1b_A121D
ECDC_NL18_180925049202	2018	Netherlands	Not stated	EuroGASP2018	PRJEB34068	ERR9838996	SAMEA5958701	No data	S	No data	R	0.19	S	0.032	S	0.023	S	1.5	R	No data	I	14700	3031	4	13489	59	39	67	158	148	153	918	1225	13.001	19	3	1	1	9	100	-	-	-	-	-	rpsJ_V57M	-	-	-
ECDC_NL18_180926006001	2018	Netherlands	Not stated	EuroGASP2018	PRJEB34068	ERR9838679	SAMEA5958789	No data	S	No data	I	0.047	S	<0,016	S	0.003	S	0.002	S	No data	I	8110	4828	16	8163	59	39	170	111	188	71	223	84	22.001	15	100	100	100	7	100	-	-	-	-	-	rpsJ_V57M	-	-	-
ECDC_NL18_180927041807	2018	Netherlands	Not stated	EuroGASP2018	PRJEB34068	ERR9837213	SAMEA5958725	No data	S	No data	I	1	R	0.016	S	0.004	S	0.006	S	No data	I	new	6720	29	14399	109	39	170	238	148	153	133	3606	2.047	39	3	100	100	100	100	-	-	-	-	-	rpsJ_V57M	-	-	-
ECDC_NL18_180927061902	2018	Netherlands	Not stated	EuroGASP2018	PRJEB34068	ERR9837215	SAMEA5958727	No data	S	No data	I	0.094	S	<0,016	S	0.002	S	<0,002	S	No data	I	new	new	18	8156	59	39	67	111	150	153	65	432	14.001	1	1	1	100	2	100	-	-	-	-	-	-	-	-	-
ECDC_NL18_180929000701	2018	Netherlands	Not stated	EuroGASP2018	PRJEB34068	ERR9837239	SAMEA5958740	No data	S	No data	I	8	R	<0,016	S	0.004	S	0.002	S	No data	I	new	new	29	1580	126	39	67	111	148	153	133	3710	93.001	409	3	100	100	100	2	-	-	23S_rDNA_c2597t	-	-	rpsJ_V57M	-	-	-
ECDC_NL18_181002007601	2018	Netherlands	Not stated	EuroGASP2018	PRJEB34068	ERR9839013	SAMEA5958743	No data	S	No data	R	0.125	S	0.032	S	0.023	S	1	R	No data	I	14700	3031	4	13489	59	39	67	158	148	153	918	1225	13.001	19	3	1	1	9	100	-	-	-	-	-	rpsJ_V57M	-	-	-
ECDC_NL18_181003008701	2018	Netherlands	Not stated	EuroGASP2018	PRJEB34068	ERR9837257	SAMEA5958747	No data	S	No data	R	0.125	S	0.016	S	0.008	S	0.5	R	No data	R	15589	7738	1971	1583	59	39	67	111	148	153	65	1340	43.002	122	100	100	7	6	100	-	-	-	blaTEM	tetM	rpsJ_V57M	-	-	-
ECDC_NL18_181005003102	2018	Netherlands	Not stated	EuroGASP2018	PRJEB34068	ERR9839083	SAMEA5958778	No data	S	No data	I	0.25	S	<0,016	S	0.002	S	0.002	S	No data	I	9208	1808	18	13292	126	39	785	156	148	153	133	439	2.001	9	1	100	100	1	100	-	-	-	-	-	rpsJ_V57M	-	-	-
ECDC_NL18_181005006501	2018	Netherlands	Not stated	EuroGASP2018	PRJEB34068	ERR9837290	SAMEA5958783	No data	S	No data	R	0.094	S	0.047	S	0.064	S	8	R	No data	R	14051	8111	4	7827	59	39	67	158	148	153	65	38	13.001	19	8	1	1	9	100	-	-	-	-	-	rpsJ_V57M	-	porB1b_G120K	porB1b_A121D
ECDC_NL18_181005048801	2018	Netherlands	Not stated	EuroGASP2018	PRJEB34068	ERR9838953	SAMEA5958795	No data	S	No data	I	0.19	S	<0,016	S	0.002	S	0.002	S	No data	I	9208	1808	18	13292	126	39	785	156	148	153	133	439	2.001	9	1	100	100	1	100	-	-	-	-	-	rpsJ_V57M	-	-	-
ECDC_NL18_181006004507	2018	Netherlands	Not stated	EuroGASP2018	PRJEB34068	ERR9839097	SAMEA5785148	No data	S	No data	I	0.75	R	<0,016	S	0.004	S	0.006	S	No data	I	3935	908	29	11422	109	39	67	238	148	153	133	193	2.001	39	11	100	100	100	100	-	-	-	-	-	rpsJ_V57M	-	porB1b_G120K	-
ECDC_NL18_181009046801	2018	Netherlands	Not stated	EuroGASP2018	PRJEB34068	ERR9838702	SAMEA5958807	No data	S	No data	I	0.047	S	<0,016	S	0.006	S	0.002	S	No data	I	226	22	16	8163	59	39	170	111	188	71	223	84	22.001	15	100	100	100	7	100	-	-	-	-	-	rpsJ_V57M	-	-	-
ECDC_NL18_181010053801	2018	Netherlands	Not stated	EuroGASP2018	PRJEB34068	ERR9838700	SAMEA5958806	No data	S	No data	I	0.047	S	<0,016	S	0.003	S	<0,002	S	No data	I	new	new	16	8163	59	39	170	111	188	71	223	84	22.001	15	100	100	100	7	100	-	-	-	-	-	rpsJ_V57M	-	-	-
ECDC_NL18_181011024801	2018	Netherlands	Not stated	EuroGASP2018	PRJEB34068	ERR9838703	SAMEA5958813	No data	S	No data	I	0.047	S	<0,016	S	0.004	S	0.002	S	No data	I	new	new	16	8163	59	39	170	111	188	71	223	84	22.001	15	100	100	100	7	100	-	-	-	-	-	rpsJ_V57M	-	-	-
ECDC_NL18_181012012103	2018	Netherlands	Not stated	EuroGASP2018	PRJEB34068	ERR9838707	SAMEA5958816	No data	S	No data	I	0.38	S	<0,016	S	0.003	S	0.002	S	No data	I	9208	1808	18	13292	126	39	785	156	148	153	133	439	2.001	9	1	100	100	1	100	-	-	-	-	-	rpsJ_V57M	-	-	-
ECDC_NL18_181012047701	2018	Netherlands	Not stated	EuroGASP2018	PRJEB34068	ERR9838709	SAMEA5958821	No data	S	No data	I	0.094	S	0.032	S	0.023	S	<0,002	S	No data	I	10651	101	18	1893	59	39	67	157	147	153	133	3043	9.001	25	1	100	100	2	100	-	-	-	-	-	rpsJ_V57M	-	-	-
ECDC_NL18_181016003401	2018	Netherlands	Not stated	EuroGASP2018	PRJEB34068	ERR9839180	SAMEA5958832	No data	S	No data	I	0.25	S	<0,016	S	0.003	S	0.002	S	No data	I	new	6720	18	13292	126	39	785	156	148	153	133	2620	2.001	9	3	100	100	1	100	-	-	-	-	-	rpsJ_V57M	-	-	-
ECDC_NL18_181017000401	2018	Netherlands	Not stated	EuroGASP2018	PRJEB34068	ERR9838722	SAMEA5958835	No data	S	No data	I	0.19	S	<0,016	S	0.003	S	1	R	No data	I	5624	90	953	8143	59	39	170	78	146	154	65	426	2.002	40	13	100	7	4	100	-	-	-	-	-	rpsJ_V57M	-	-	-
ECDC_NL18_181018042901	2018	Netherlands	Not stated	EuroGASP2018	PRJEB34068	ERR9839222	SAMEA5958848	No data	S	No data	I	1	R	<0,016	S	0.008	S	4	R	No data	I	12302	908	267	9363	126	39	67	238	148	153	133	168	2.001	39	11	100	7	4	100	-	-	-	-	-	rpsJ_V57M	-	porB1b_G120K	-
ECDC_NL18_181019003902	2018	Netherlands	Not stated	EuroGASP2018	PRJEB34068	ERR9838803	SAMEA5958849	No data	S	No data	I	1	R	<0,016	S	0.006	S	4	R	No data	I	12302	908	267	9363	126	39	67	238	148	153	133	168	2.001	39	11	100	7	4	100	-	-	-	-	-	rpsJ_V57M	-	porB1b_G120K	-
ECDC_NL18_181019005401	2018	Netherlands	Not stated	EuroGASP2018	PRJEB34068	ERR9838735	SAMEA5958850	No data	S	No data	R	0.125	S	0.016	S	0.006	S	0.38	R	No data	R	15589	7738	1971	1583	59	39	67	111	148	153	65	1340	43.002	122	100	100	7	6	100	-	-	-	blaTEM	tetM	rpsJ_V57M	-	-	-
ECDC_NL18_181020008301	2018	Netherlands	Not stated	EuroGASP2018	PRJEB34068	ERR9838738	SAMEA5958854	No data	S	No data	R	0.016	S	<0,016	S	<0,002	S	2	R	No data	I	new	new	137	1921	59	39	67	111	148	71	65	879	19.001	139	100	1	7	3	100	-	-	-	-	tetM	rpsJ_V57M	-	-	-
ECDC_NL18_181022028201	2018	Netherlands	Not stated	EuroGASP2018	PRJEB34068	ERR9838812	SAMEA5958856	No data	S	No data	I	1	R	<0,016	S	0.006	S	>32	R	No data	I	12302	908	267	9363	126	39	67	238	148	153	133	168	2.001	39	11	100	7	4	100	-	-	-	-	-	rpsJ_V57M	-	porB1b_G120K	-
ECDC_NL18_181022032702	2018	Netherlands	Not stated	EuroGASP2018	PRJEB34068	ERR9838816	SAMEA5958857	No data	S	No data	R	0.094	S	0.016	S	0.008	S	6	R	No data	R	14769	55	1971	1583	59	39	67	111	148	153	65	3544	43.002	122	1	100	7	3	100	-	-	-	blaTEM	tetM	rpsJ_V57M	-	-	-
ECDC_NL18_181023002401	2018	Netherlands	Not stated	EuroGASP2018	PRJEB34068	ERR9838820	SAMEA5958859	No data	S	No data	I	0.75	R	<0,016	S	0.006	S	12	R	No data	I	12302	908	267	9363	126	39	67	238	148	153	133	168	2.001	39	11	100	7	4	100	-	-	-	-	-	rpsJ_V57M	-	porB1b_G120K	-
ECDC_NL18_181023008901	2018	Netherlands	Not stated	EuroGASP2018	PRJEB34068	ERR9838741	SAMEA5958858	No data	S	No data	I	0.023	S	<0,016	S	0.003	S	0.002	S	No data	I	226	22	16	8163	59	39	170	111	188	71	223	84	22.001	15	100	100	100	7	100	-	-	-	-	-	rpsJ_V57M	-	-	-
ECDC_NL18_181025005001	2018	Netherlands	Not stated	EuroGASP2018	PRJEB34068	ERR9839042	SAMEA5958758	No data	S	No data	I	1	R	<0,016	S	0.006	S	12	R	No data	I	12302	908	267	9363	126	39	67	238	148	153	133	168	2.001	39	11	100	7	4	100	-	-	-	-	-	rpsJ_V57M	-	porB1b_G120K	-
ECDC_NL18_181025005601	2018	Netherlands	Not stated	EuroGASP2018	PRJEB34068	ERR9837266	SAMEA5958759	No data	S	No data	R	0.125	S	<0,016	S	0.004	S	0.5	R	No data	R	15589	7738	1971	1583	59	39	67	111	148	153	65	3310	2.001	122	100	100	7	6	100	-	-	-	blaTEM	tetM	rpsJ_V57M	-	-	-
ECDC_NL18_181025006202	2018	Netherlands	Not stated	EuroGASP2018	PRJEB34068	ERR9839033	SAMEA5958754	No data	S	No data	R	0.19	S	0.032	S	0.023	S	1.5	R	No data	I	14700	3031	4	13489	59	39	67	158	148	153	918	1225	13.001	19	3	1	1	9	100	-	-	-	-	-	rpsJ_V57M	-	-	-
ECDC_NL18_181025051402	2018	Netherlands	Not stated	EuroGASP2018	PRJEB34068	ERR9837274	SAMEA5958764	No data	S	No data	I	0.19	S	<0,016	S	0.003	S	0.002	S	No data	I	9208	1808	18	13292	126	39	785	156	148	153	133	439	2.001	9	1	100	100	1	100	-	-	-	-	-	rpsJ_V57M	-	-	-
ECDC_NL18_181026002901	2018	Netherlands	Not stated	EuroGASP2018	PRJEB34068	ERR9839071	SAMEA5958771	No data	S	No data	I	0.25	S	<0,016	S	0.003	S	0.002	S	No data	I	5049	3059	29	11864	126	39	785	238	148	153	133	439	2.001	9	1	100	100	1	100	-	-	-	-	-	rpsJ_V57M	-	-	-
ECDC_NL18_181026040401	2018	Netherlands	Not stated	EuroGASP2018	PRJEB34068	ERR9839075	SAMEA5958774	No data	S	No data	I	0.094	S	<0,016	S	0.002	S	1	R	No data	I	5624	90	953	8143	59	39	170	78	146	154	65	426	2.002	40	13	100	7	4	100	-	-	-	-	-	rpsJ_V57M	-	-	-
ECDC_NL18_181029038801	2018	Netherlands	Not stated	EuroGASP2018	PRJEB34068	ERR9839131	SAMEA5958810	No data	S	No data	R	0.125	S	0.094	S	0.094	S	16	R	No data	R	10386	246	4	7827	59	39	67	158	148	153	65	38	13.001	19	8	1	1	9	100	-	-	-	-	-	rpsJ_V57M	-	porB1b_G120K	porB1b_A121D
ECDC_NL18_181030056201	2018	Netherlands	Not stated	EuroGASP2018	PRJEB34068	ERR9838732	SAMEA5958844	No data	S	No data	R	0.19	S	0.064	S	0.064	S	32	R	No data	R	10386	246	4	7827	59	39	67	158	148	153	65	38	13.001	19	8	1	1	9	100	-	-	-	-	-	rpsJ_V57M	-	porB1b_G120K	porB1b_A121D
ECDC_NL18_181031045001	2018	Netherlands	Not stated	EuroGASP2018	PRJEB34068	ERR9839143	SAMEA5958817	No data	S	No data	I	0.75	R	<0,016	S	0.006	S	0.008	S	No data	I	7019	2043	29	9363	126	39	67	238	148	153	133	193	2.001	39	11	100	100	100	100	-	-	-	-	-	rpsJ_V57M	-	porB1b_G120K	-
ECDC_NL18_181101012501	2018	Netherlands	Not stated	EuroGASP2018	PRJEB34068	ERR9839155	SAMEA5958820	No data	S	No data	I	0.19	S	<0,016	S	0.002	S	1.5	R	No data	I	5624	90	953	8143	59	39	170	78	146	154	65	426	2.002	40	13	100	7	4	100	-	-	-	-	-	rpsJ_V57M	-	-	-
ECDC_NL18_181101012902	2018	Netherlands	Not stated	EuroGASP2018	PRJEB34068	ERR9839163	SAMEA5958825	No data	S	No data	I	0.19	S	<0,016	S	0.003	S	2	R	No data	I	5624	90	953	8143	59	39	170	78	146	154	65	426	2.002	40	13	100	7	4	100	-	-	-	-	-	rpsJ_V57M	-	-	-
ECDC_NL18_181101013602	2018	Netherlands	Not stated	EuroGASP2018	PRJEB34068	ERR9839213	SAMEA5958846	No data	S	No data	R	0.016	S	<0,016	S	0.003	S	1	R	No data	I	new	new	137	1921	59	39	67	111	148	71	65	879	19.001	139	100	1	7	3	100	-	-	-	-	tetM	rpsJ_V57M	-	-	-
ECDC_NL18_181102010201	2018	Netherlands	Not stated	EuroGASP2018	PRJEB34068	ERR9839184	SAMEA5958833	No data	S	No data	I	0.125	S	<0,016	S	0.002	S	1.5	R	No data	I	5624	90	953	8143	59	39	170	78	146	154	65	426	2.002	40	13	100	7	4	100	-	-	-	-	-	rpsJ_V57M	-	-	-
ECDC_NL18_181102013201	2018	Netherlands	Not stated	EuroGASP2018	PRJEB34068	ERR9838784	SAMEA5958925	No data	S	No data	R	0.125	S	<0,016	S	0.006	S	0.38	R	No data	R	15589	7738	1971	1583	59	39	67	111	148	153	65	1340	43.002	122	100	100	7	6	100	-	-	-	blaTEM	tetM	rpsJ_V57M	-	-	-
ECDC_NL18_181103017501	2018	Netherlands	Not stated	EuroGASP2018	PRJEB34068	ERR9839209	SAMEA5958845	No data	S	No data	R	0.5	S	0.047	S	0.047	S	24	R	No data	R	new	246	137	7827	59	39	67	158	148	153	65	38	13.001	19	8	1	1	9	100	-	-	-	-	-	rpsJ_V57M	-	porB1b_G120K	porB1b_A121D
ECDC_NL18_181106013601	2018	Netherlands	Not stated	EuroGASP2018	PRJEB34068	ERR9838788	SAMEA5958929	No data	S	No data	R	0.125	S	0.016	S	0.008	S	0.5	R	No data	R	15589	7738	1971	1583	59	39	67	111	148	153	65	1340	43.002	122	100	100	7	6	100	-	-	-	blaTEM	tetM	rpsJ_V57M	-	-	-
ECDC_NL18_181110000301	2018	Netherlands	Not stated	EuroGASP2018	PRJEB34068	ERR9838795	SAMEA5958935	No data	S	No data	I	0.064	S	<0,016	S	0.002	S	0.002	S	No data	I	2	2	16	8163	59	39	170	111	188	71	223	84	22.001	15	100	100	100	7	100	-	-	-	-	-	rpsJ_V57M	-	-	-
ECDC_NL18_181110006807	2018	Netherlands	Not stated	EuroGASP2018	PRJEB34068	ERR9838797	SAMEA5958937	No data	S	No data	R	0.094	S	0.016	S	0.006	S	2	R	No data	R	338	90	121	1588	59	39	67	158	148	71	65	1873	19.001	261	13	1	7	3	100	-	-	-	blaTEM	-	rpsJ_V57M	-	-	-
ECDC_NL18_181115038101	2018	Netherlands	Not stated	EuroGASP2018	PRJEB34068	ERR9839062	SAMEA5958949	No data	S	No data	I	0.25	S	<0,016	S	0.003	S	0.002	S	No data	I	new	6720	18	13292	126	39	785	156	148	153	133	2620	2.001	9	3	100	100	1	100	-	-	-	-	-	rpsJ_V57M	-	-	-
ECDC_NL18_181115041301	2018	Netherlands	Not stated	EuroGASP2018	PRJEB34068	ERR9839074	SAMEA5958952	No data	S	No data	R	0.125	S	0.016	S	0.006	S	0.5	R	No data	R	15589	7738	1971	1583	59	39	67	111	148	153	65	1340	43.002	122	100	100	7	6	100	-	-	-	blaTEM	tetM	rpsJ_V57M	-	-	-
ECDC_NL2	2013	Netherlands	NL2	EuroGASP2013	PRJEB9227	ERR1514746	SAMEA3431767	No data	S	No data	I	0.25	S	0.016	S	0.003	S	0.003	S	No data	I	2992	1808	29	9362	126	39	67	238	147	153	133	new	2.001	9	1	100	100	100	new	-	-	-	-	-	rpsJ_V57M	-	-	-
ECDC_NL22	2013	Netherlands	NL22	EuroGASP2013	PRJEB9227	ERR1528251	SAMEA3431800	No data	S	No data	I	0.25	S	0.016	S	0.008	S	0.003	S	No data	I	2992	1808	29	9363	126	39	67	238	148	153	133	new	2.001	9	1	100	100	100	new	-	-	-	-	-	rpsJ_V57M	-	-	-
ECDC_NL27	2013	Netherlands	NL27	EuroGASP2013	PRJEB9227	ERR1528256	SAMEA3431809	No data	S	No data	I	0.38	S	0.016	S	0.004	S	0.003	S	No data	I	2992	1808	29	9362	126	39	67	238	147	153	133	63	2.001	9	1	100	100	100	100	-	-	-	-	-	rpsJ_V57M	-	-	-
ECDC_NL28	2013	Netherlands	NL28	EuroGASP2013	PRJEB9227	ERR1528257	SAMEA3431811	No data	S	No data	I	0.19	S	0.016	S	0.023	S	0.012	S	No data	I	2992	1808	29	9362	126	39	67	238	147	153	133	63	2.001	9	1	100	100	100	100	-	-	-	-	-	rpsJ_V57M	-	-	-
ECDC_NL29	2013	Netherlands	NL29	EuroGASP2013	PRJEB9227	ERR1528258	SAMEA3431813	No data	S	No data	I	0.19	S	0.016	S	0.003	S	0.003	S	No data	I	11063	1808	19	9363	126	39	67	238	148	153	133	860	14.001	9	1	100	100	100	100	-	-	-	-	-	rpsJ_V57M	-	-	-
ECDC_NL31	2013	Netherlands	NL31	EuroGASP2013	PRJEB9227	ERR1528260	SAMEA3431817	No data	S	No data	I	0.38	S	0.016	S	0.004	S	0.004	S	No data	I	2992	1808	29	9362	126	39	67	238	147	153	133	63	2.001	9	1	100	100	100	100	-	-	-	-	-	rpsJ_V57M	-	-	-
ECDC_NL35	2013	Netherlands	NL35	EuroGASP2013	PRJEB9227	ERR1528263	SAMEA3431823	No data	S	No data	I	0.19	S	0.016	S	0.008	S	3	R	No data	R	5624	90	953	8143	59	39	170	78	146	154	65	426	2.002	40	13	100	7	4	100	-	-	-	blaTEM	-	rpsJ_V57M	-	-	-
ECDC_NL37	2013	Netherlands	NL37	EuroGASP2013	PRJEB9227	ERR1528265	SAMEA3431826	No data	S	No data	I	0.25	S	0.016	S	0.006	S	3	R	No data	R	5624	90	953	8143	59	39	170	78	146	154	65	426	2.002	40	13	100	7	4	100	-	-	-	blaTEM	-	rpsJ_V57M	-	-	-
ECDC_NL38	2013	Netherlands	NL38	EuroGASP2013	PRJEB9227	ERR1528266	SAMEA3431828	No data	S	No data	I	0.094	S	0.016	S	0.006	S	0.004	S	No data	I	2	2	16	8163	59	39	170	111	188	71	223	84	22.001	15	100	100	100	7	100	-	-	-	-	-	rpsJ_V57M	-	-	-
ECDC_NL43	2013	Netherlands	NL43	EuroGASP2013	PRJEB9227	ERR1528270	SAMEA3431836	No data	S	No data	I	0.19	S	0.016	S	0.003	S	0.002	S	No data	I	8154	1808	1501	9363	126	39	67	238	148	153	133	63	2.001	9	1	100	100	100	100	-	-	-	-	-	rpsJ_V57M	-	-	-
ECDC_NL72	2013	Netherlands	NL72	EuroGASP2013	PRJEB9227	ERR1528287	SAMEA3431870	No data	S	No data	I	0.25	S	0.016	S	0.004	S	0.003	S	No data	I	2992	1808	29	9362	126	39	67	238	147	153	133	63	2.001	9	1	100	100	100	100	-	-	-	-	-	rpsJ_V57M	-	-	-
ECDC_NL82	2013	Netherlands	NL82	EuroGASP2013	PRJEB9227	ERR1528293	SAMEA3431882	No data	S	No data	I	0.25	S	0.016	S	0.003	S	0.004	S	No data	I	8154	1808	1501	9363	126	39	67	238	148	153	133	63	2.001	9	1	100	100	100	100	-	-	-	-	-	rpsJ_V57M	-	-	-
ECDC_NL89	2013	Netherlands	NL89	EuroGASP2013	PRJEB9227	ERR1528298	SAMEA3431892	No data	S	No data	I	0.25	S	0.016	S	0.004	S	0.004	S	No data	I	8154	1808	1501	9363	126	39	67	238	148	153	133	new	2.001	9	1	100	100	100	new	-	-	-	-	-	rpsJ_V57M	-	-	-
ECDC_NL9	2013	Netherlands	NL9	EuroGASP2013	PRJEB9227	ERR1514753	SAMEA3431780	No data	S	No data	I	0.125	S	0.016	S	0.006	S	1.5	R	No data	R	5624	90	953	8143	59	39	170	78	146	154	65	426	2.002	40	13	100	7	4	100	-	-	-	blaTEM	-	rpsJ_V57M	-	-	-
ECDC_NO18_638011	2018	Norway	Not stated	EuroGASP2018	PRJEB34068	ERR9838289	SAMEA6105867	No data	S	No data	I	1.5	R	<0,016	S	<0,016	S	1.5	R	No data	I	new	new	267	9363	126	39	67	238	148	153	133	1487	2.001	39	1	100	7	4	100	-	-	-	-	-	rpsJ_V57M	-	-	-
ECDC_NO18_638015	2018	Norway	Not stated	EuroGASP2018	PRJEB34068	ERR9838294	SAMEA6105869	No data	S	No data	I	3	R	0.016	S	0.016	S	0.012	S	No data	I	3935	908	29	11422	109	39	67	238	148	153	133	193	2.001	39	11	100	100	100	100	-	-	-	-	-	rpsJ_V57M	-	porB1b_G120K	-
ECDC_NO18_638017	2018	Norway	Not stated	EuroGASP2018	PRJEB34068	ERR9838541	SAMEA6105870	No data	S	No data	R	0.125	S	0.016	S	<0,016	S	1	R	No data	R	new	6412	new	1596	59	39	67	78	148	71	65	2019	19.001	5	14	1	7	15	100	-	-	-	blaTEM	tetM	rpsJ_V57M	-	-	-
ECDC_NO18_638131	2018	Norway	Not stated	EuroGASP2018	PRJEB34068	ERR9838297	SAMEA6105871	No data	S	No data	I	3	R	<0,016	S	<0,016	S	12	R	No data	I	12302	908	267	9363	126	39	67	238	148	153	133	168	2.001	39	11	100	7	4	100	-	-	-	-	-	rpsJ_V57M	-	porB1b_G120K	-
ECDC_NO18_638274	2018	Norway	Not stated	EuroGASP2018	PRJEB34068	ERR9838324	SAMEA6105888	No data	S	No data	I	0.75	S	<0,016	S	<0,016	S	0.002	S	No data	I	5049	3059	29	11864	126	39	785	238	148	153	133	439	2.001	9	1	100	100	1	100	-	-	-	-	-	rpsJ_V57M	-	-	-
ECDC_NO18_638328	2018	Norway	Not stated	EuroGASP2018	PRJEB34068	ERR9838326	SAMEA6105889	No data	S	No data	R	0.016	S	<0,016	S	<0,016	S	<0,002	S	No data	I	new	new	25	7363	59	39	67	78	148	153	65	3703	68.001	19	16	1	100	2	100	-	-	-	-	-	rpsJ_V57M	-	-	-
ECDC_NO18_638462	2018	Norway	Not stated	EuroGASP2018	PRJEB34068	ERR9839524	SAMEA6106653	No data	S	No data	I	0.047	R	<0,016	S	<0,016	S	1.5	R	No data	I	new	3003	267	9363	126	39	67	238	148	153	133	168	2.001	39	11	100	7	4	100	-	-	-	-	-	rpsJ_V57M	-	porB1b_G120K	-
ECDC_NO18_638464	2018	Norway	Not stated	EuroGASP2018	PRJEB34068	ERR9838563	SAMEA6105891	No data	S	No data	I	0.032	R	<0,016	S	<0,016	S	1	R	No data	I	new	3003	267	9363	126	39	67	238	148	153	133	168	2.001	39	11	100	7	4	100	-	-	-	-	-	rpsJ_V57M	-	porB1b_G120K	-
ECDC_NO18_638468	2018	Norway	Not stated	EuroGASP2018	PRJEB34068	ERR9838306	SAMEA6105875	No data	S	No data	I	0.047	R	<0,016	S	<0,016	S	0.75	R	No data	I	new	3003	267	9363	126	39	67	238	148	153	133	168	2.001	39	11	100	7	4	100	-	-	-	-	-	rpsJ_V57M	-	porB1b_G120K	-
ECDC_NO18_638746	2018	Norway	Not stated	EuroGASP2018	PRJEB34068	ERR9838551	SAMEA6105881	No data	S	No data	I	0.75	S	0.19	R	0.023	S	1	R	No data	I	new	new	new	7827	59	39	67	158	148	153	65	3720	171.001	89	4	1	1	4	100	-	-	-	-	-	rpsJ_V57M	-	-	-
ECDC_NO18_638809	2018	Norway	Not stated	EuroGASP2018	PRJEB34068	ERR9838315	SAMEA6105879	No data	S	No data	I	2	R	<0,016	S	0.016	S	0.012	S	No data	I	3935	908	29	11422	109	39	67	238	148	153	133	193	2.001	39	11	100	100	100	100	-	-	-	-	-	rpsJ_V57M	-	porB1b_G120K	-
ECDC_NO18_639357	2018	Norway	Not stated	EuroGASP2018	PRJEB34068	ERR9839420	SAMEA6106471	No data	S	No data	I	0.38	S	<0,016	S	<0,016	S	3	R	No data	R	new	new	953	8143	59	39	170	78	146	154	65	2982	2.002	40	3	1	7	3	100	-	-	-	blaTEM	-	rpsJ_V57M	-	-	-
ECDC_NO18_639361	2018	Norway	Not stated	EuroGASP2018	PRJEB34068	ERR9839425	SAMEA6106470	No data	S	No data	I	1.5	R	0.023	S	0.016	S	0.012	S	No data	I	3935	908	29	11422	109	39	67	238	148	153	133	193	2.001	39	11	100	100	100	100	-	-	-	-	-	rpsJ_V57M	-	porB1b_G120K	-
ECDC_NO18_639363	2018	Norway	Not stated	EuroGASP2018	PRJEB34068	ERR9838193	SAMEA6106474	No data	S	No data	I	2	R	0.023	S	0.023	S	8	R	No data	I	12302	908	267	9363	126	39	67	238	148	153	133	168	2.001	39	11	100	7	4	100	-	-	-	-	-	rpsJ_V57M	-	porB1b_G120K	-
ECDC_NO18_639450	2018	Norway	Not stated	EuroGASP2018	PRJEB34068	ERR9837822	SAMEA6105589	No data	S	No data	I	0.75	S	<0,016	S	<0,016	S	0.002	S	No data	I	9208	1808	18	13292	126	39	785	156	148	153	133	439	2.001	9	1	100	100	1	100	-	-	-	-	-	rpsJ_V57M	-	-	-
ECDC_NO18_640299	2018	Norway	Not stated	EuroGASP2018	PRJEB34068	ERR9838380	SAMEA6106482	No data	S	No data	I	1.5	R	<0,016	S	<0,016	S	1.5	R	No data	I	new	new	267	9363	126	39	67	238	148	153	133	1040	2.001	39	31	100	7	4	100	-	-	-	-	-	rpsJ_V57M	-	-	-
ECDC_NO18_640324	2018	Norway	Not stated	EuroGASP2018	PRJEB34068	ERR9839450	SAMEA6106485	No data	S	No data	I	0.032	R	<0,016	S	<0,016	S	0.75	R	No data	I	new	3003	267	9363	126	39	67	238	148	153	133	168	2.001	39	11	100	7	4	100	-	-	-	-	-	rpsJ_V57M	-	porB1b_G120K	-
ECDC_NO18_640326	2018	Norway	Not stated	EuroGASP2018	PRJEB34068	ERR9839454	SAMEA6106486	No data	S	No data	I	0.032	R	<0,016	S	<0,016	S	1	R	No data	I	12302	908	267	9363	126	39	67	238	148	153	133	168	2.001	39	11	100	7	4	100	-	-	-	-	-	rpsJ_V57M	-	porB1b_G120K	-
ECDC_NO18_640376	2018	Norway	Not stated	EuroGASP2018	PRJEB34068	ERR9839456	SAMEA6106487	No data	S	No data	I	1	R	<0,016	S	<0,016	S	8	R	No data	I	12302	908	267	9363	126	39	67	238	148	153	133	168	2.001	39	11	100	7	4	100	-	-	-	-	-	rpsJ_V57M	-	porB1b_G120K	-
ECDC_NO18_640384	2018	Norway	Not stated	EuroGASP2018	PRJEB34068	ERR9839460	SAMEA6106488	No data	S	No data	I	0.38	S	<0,016	S	<0,016	S	1	R	No data	R	5624	90	953	8143	59	39	170	78	146	154	65	426	2.002	40	13	100	7	4	100	-	-	-	blaTEM	-	rpsJ_V57M	-	-	-
ECDC_NO18_640468	2018	Norway	Not stated	EuroGASP2018	PRJEB34068	ERR9838386	SAMEA6106489	No data	S	No data	I	1.5	R	<0,016	S	<0,016	S	1.5	R	No data	I	14698	8567	267	9363	126	39	67	238	148	153	133	1040	2.001	39	31	100	7	4	100	-	-	-	-	-	rpsJ_V57M	-	-	-
ECDC_NO18_640489	2018	Norway	Not stated	EuroGASP2018	PRJEB34068	ERR9838208	SAMEA6106503	No data	S	No data	I	1.5	R	<0,016	S	<0,016	S	0.012	S	No data	I	3935	908	29	11422	109	39	67	238	148	153	133	193	2.001	39	11	100	100	100	100	-	-	-	-	-	rpsJ_V57M	-	porB1b_G120K	-
ECDC_NO18_640660	2018	Norway	Not stated	EuroGASP2018	PRJEB34068	ERR9839473	SAMEA6106506	No data	S	No data	I	1.5	R	<0,016	S	<0,016	S	2	R	No data	I	14698	8567	267	9363	126	39	67	238	148	153	133	1040	2.001	39	31	100	7	4	100	-	-	-	-	-	rpsJ_V57M	-	-	-
ECDC_NO18_640715	2018	Norway	Not stated	EuroGASP2018	PRJEB34068	ERR9839478	SAMEA6106499	No data	S	No data	R	0.032	S	<0,016	S	<0,016	S	0.75	R	No data	R	new	90	2056	13474	59	112	67	78	148	153	133	new	2.002	new	13	100	7	4	100	-	-	-	blaTEM	tetM	rpsJ_V57M	-	-	-
ECDC_NO18_640718	2018	Norway	Not stated	EuroGASP2018	PRJEB34068	ERR9839480	SAMEA6106500	No data	S	No data	I	1	R	<0,016	S	<0,016	S	0.008	S	No data	I	3935	908	29	11422	109	39	67	238	148	153	133	193	2.001	39	11	100	100	100	100	-	-	-	-	-	rpsJ_V57M	-	porB1b_G120K	-
ECDC_NO18_641085	2018	Norway	Not stated	EuroGASP2018	PRJEB34068	ERR9839492	SAMEA6106507	No data	S	No data	I	1.5	R	<0,016	S	<0,016	S	0.002	S	No data	I	new	new	29	9363	126	39	67	238	148	153	133	1252	2.001	39	4	100	100	100	100	-	-	-	-	-	rpsJ_V57M	-	-	-
ECDC_NO18_641162	2018	Norway	Not stated	EuroGASP2018	PRJEB34068	ERR9839504	SAMEA6106509	No data	S	No data	R	0.38	S	0.064	S	0.064	S	8	R	No data	R	10386	246	4	7827	59	39	67	158	148	153	65	38	13.001	19	8	1	1	9	100	-	-	-	-	-	rpsJ_V57M	-	porB1b_G120K	porB1b_A121D
ECDC_NO18_641165	2018	Norway	Not stated	EuroGASP2018	PRJEB34068	ERR9839505	SAMEA6106510	No data	S	No data	R	0.094	S	<0,016	S	<0,016	S	1	R	No data	R	13971	8060	33	1587	59	39	67	78	148	153	133	1139	2.002	89	1	100	7	4	100	-	-	-	blaTEM	tetM	rpsJ_V57M	-	-	-
ECDC_NO18_641181	2018	Norway	Not stated	EuroGASP2018	PRJEB34068	ERR9839510	SAMEA6106517	No data	S	No data	I	2	R	<0,016	S	<0,016	S	0.002	S	No data	I	298	30	29	11422	109	39	67	238	148	153	133	213	2.001	39	1	100	100	100	100	-	-	-	-	-	rpsJ_V57M	-	-	-
ECDC_NO18_641187	2018	Norway	Not stated	EuroGASP2018	PRJEB34068	ERR9839516	SAMEA6106519	No data	S	No data	I	1	S	0.125	R	0.023	S	1.5	R	No data	I	new	new	new	7827	59	39	67	158	148	153	65	3720	171.001	89	4	1	1	4	100	-	-	-	-	-	rpsJ_V57M	-	-	-
ECDC_NO18_641307	2018	Norway	Not stated	EuroGASP2018	PRJEB34068	ERR9838061	SAMEA6105958	No data	S	No data	I	2	R	0.023	S	0.016	S	0.016	S	No data	I	3935	908	29	11422	109	39	67	238	148	153	133	193	2.001	39	11	100	100	100	100	-	-	-	-	-	rpsJ_V57M	-	porB1b_G120K	-
ECDC_NO18_641430	2018	Norway	Not stated	EuroGASP2018	PRJEB34068	ERR9838393	SAMEA6106508	No data	S	No data	I	1.5	R	0.023	S	0.016	S	0.012	S	No data	I	3935	908	29	11422	109	39	67	238	148	153	133	193	2.001	39	11	100	100	100	100	-	-	-	-	-	rpsJ_V57M	-	porB1b_G120K	-
ECDC_NO18_641895	2018	Norway	Not stated	EuroGASP2018	PRJEB34068	ERR9838375	SAMEA6105658	No data	S	No data	R	0.75	S	0.047	S	0.047	S	32	R	No data	R	4676	543	107	11231	59	39	67	78	147	154	65	1707	13.002	1	12	1	7	3	100	-	-	-	blaTEM	-	rpsJ_V57M	-	porB1b_G120K	-
ECDC_NO18_642223	2018	Norway	Not stated	EuroGASP2018	PRJEB34068	ERR9838195	SAMEA6105661	No data	S	No data	I	3	R	0.016	S	0.023	S	0.016	S	No data	I	3935	908	29	11422	109	39	67	238	148	153	133	193	2.001	39	11	100	100	100	100	-	-	-	-	-	rpsJ_V57M	-	porB1b_G120K	-
ECDC_NO18_642301	2018	Norway	Not stated	EuroGASP2018	PRJEB34068	ERR9838201	SAMEA6105665	No data	S	No data	R	0.25	S	0.032	S	0.047	S	16	R	No data	R	10386	246	4	7827	59	39	67	158	148	153	65	38	13.001	19	8	1	1	9	100	-	-	-	-	-	rpsJ_V57M	-	porB1b_G120K	porB1b_A121D
ECDC_NO18_642366	2018	Norway	Not stated	EuroGASP2018	PRJEB34068	ERR9837856	SAMEA6105667	No data	S	No data	I	0.38	S	<0,016	S	<0,016	S	2	R	No data	I	11788	6904	953	13526	59	39	170	78	146	154	133	436	2.002	40	100	100	7	3	100	-	-	-	-	-	rpsJ_V57M	-	-	-
ECDC_NO18_642539	2018	Norway	Not stated	EuroGASP2018	PRJEB34068	ERR9838214	SAMEA6105677	No data	S	No data	R	0.5	S	0.047	S	0.064	S	16	R	No data	R	4676	543	107	11231	59	39	67	78	147	154	65	1707	13.002	1	12	1	7	3	100	-	-	-	blaTEM	-	rpsJ_V57M	-	porB1b_G120K	-
ECDC_NO18_642541	2018	Norway	Not stated	EuroGASP2018	PRJEB34068	ERR9838399	SAMEA6105678	No data	S	No data	R	0.094	S	<0,016	S	<0,016	S	3	R	No data	R	new	3402	92	11178	109	39	67	158	148	153	133	3676	19.001	54	14	100	7	131	100	-	-	-	blaTEM	tetM	rpsJ_V57M	-	-	-
ECDC_NO18_642599	2018	Norway	Not stated	EuroGASP2018	PRJEB34068	ERR9838220	SAMEA6105681	No data	S	No data	I	0.38	S	<0,016	S	<0,016	S	0.002	S	No data	I	15640	2577	18	13292	126	39	785	156	148	153	133	439	2.001	9	1	100	100	1	100	-	-	-	-	-	rpsJ_V57M	-	-	-
ECDC_NO18_642723	2018	Norway	Not stated	EuroGASP2018	PRJEB34068	ERR9838227	SAMEA6105685	No data	S	No data	R	0.25	S	0.032	S	0.023	S	2	R	No data	I	14700	3031	4	13489	59	39	67	158	148	153	918	1225	13.001	19	3	1	1	9	100	-	-	-	-	-	rpsJ_V57M	-	-	-
ECDC_NO18_643139	2018	Norway	Not stated	EuroGASP2018	PRJEB34068	ERR9837827	SAMEA6105594	No data	S	No data	R	0.19	S	0.047	S	0.023	S	2	R	No data	R	new	new	new	10313	109	39	170	158	148	668	65	3663	18.001	89	13	1	7	3	100	-	-	-	blaTEM	tetM	rpsJ_V57M	-	-	-
ECDC_PL18_001	2018	Poland	Not stated	EuroGASP2018	PRJEB34068	ERR9837969	SAMEA5959148	No data	S	No data	R	0.25	S	0.016	S	0.012	S	0.5	R	No data	R	15589	7738	1971	1583	59	39	67	111	148	153	65	1340	43.002	122	100	100	7	6	100	-	-	-	blaTEM	tetM	rpsJ_V57M	-	-	-
ECDC_PL18_003	2018	Poland	Not stated	EuroGASP2018	PRJEB34068	ERR9837977	SAMEA5959150	No data	S	No data	I	1	R	0.016	S	0.016	S	0.012	S	No data	I	5035	1914	29	9363	126	39	67	238	148	153	133	193	2.001	39	11	100	100	100	100	-	-	-	-	-	rpsJ_V57M	-	porB1b_G120K	-
ECDC_PL18_004	2018	Poland	Not stated	EuroGASP2018	PRJEB34068	ERR9837980	SAMEA5959151	No data	S	No data	R	0.38	S	0.032	S	0.032	S	12	R	No data	R	new	new	4	7827	59	39	67	158	148	153	65	3699	44.001	19	10	1	1	9	100	-	-	-	-	-	rpsJ_V57M	-	porB1b_G120K	porB1b_A121D
ECDC_PL18_007	2018	Poland	Not stated	EuroGASP2018	PRJEB34068	ERR9837693	SAMEA5959154	No data	S	No data	R	0.38	S	0.047	S	0.032	S	1.5	R	No data	I	14700	3031	4	7827	59	39	67	158	148	153	65	1225	13.001	19	3	1	1	9	100	-	-	-	-	-	rpsJ_V57M	-	-	-
ECDC_PL18_010	2018	Poland	Not stated	EuroGASP2018	PRJEB34068	ERR9837996	SAMEA5959157	No data	S	No data	R	0.25	S	0.032	S	0.016	S	0.5	R	No data	R	14769	55	1971	1583	59	39	67	111	148	153	65	539	43.002	122	1	100	7	6	100	-	-	-	blaTEM	tetM	rpsJ_V57M	-	-	-
ECDC_PL18_019	2018	Poland	Not stated	EuroGASP2018	PRJEB34068	ERR9838014	SAMEA5959162	No data	S	No data	I	0.5	S	<0,016	S	0.004	S	0.003	S	No data	I	682	462	29	8134	126	39	67	157	148	153	133	63	2.001	9	1	100	100	100	100	-	-	-	-	-	rpsJ_V57M	-	-	-
ECDC_PL18_022	2018	Poland	Not stated	EuroGASP2018	PRJEB34068	ERR9837706	SAMEA5959165	No data	S	No data	R	0.19	S	0.023	S	0.012	S	0.5	R	No data	R	14769	55	1971	1583	59	39	67	111	148	153	65	539	43.002	122	1	100	7	6	100	-	-	-	blaTEM	tetM	rpsJ_V57M	-	-	-
ECDC_PL18_027	2018	Poland	Not stated	EuroGASP2018	PRJEB34068	ERR9838032	SAMEA5959171	No data	S	No data	R	0.19	S	0.016	S	0.012	S	0.38	R	No data	R	new	7738	893	7371	59	39	170	111	148	153	65	1340	43.002	122	100	100	7	6	100	-	-	-	blaTEM	tetM	rpsJ_V57M	-	-	-
ECDC_PL18_034	2018	Poland	Not stated	EuroGASP2018	PRJEB34068	ERR9837716	SAMEA5959178	No data	S	No data	R	0.25	S	0.016	S	0.012	S	0.38	R	No data	R	14769	55	1971	1583	59	39	67	111	148	153	65	539	43.002	122	1	100	7	6	100	-	-	-	blaTEM	tetM	rpsJ_V57M	-	-	-
ECDC_PL18_041	2018	Poland	Not stated	EuroGASP2018	PRJEB34068	ERR9837818	SAMEA5959185	No data	S	No data	R	0.19	S	0.016	S	0.012	S	0.38	R	No data	R	14769	55	1971	1583	59	39	67	111	148	153	65	539	43.002	122	1	100	7	6	100	-	-	-	blaTEM	tetM	rpsJ_V57M	-	-	-
ECDC_PL18_042	2018	Poland	Not stated	EuroGASP2018	PRJEB34068	ERR9837821	SAMEA5959186	No data	S	No data	I	0.38	S	<0,016	S	0.003	S	1.5	R	No data	I	new	90	new	13142	59	39	170	78	146	71	65	2601	19.001	40	13	100	7	4	100	-	-	-	-	-	rpsJ_V57M	-	-	-
ECDC_PL18_045	2018	Poland	Not stated	EuroGASP2018	PRJEB34068	ERR9837828	SAMEA5785189	No data	S	No data	R	0.38	S	0.047	S	0.023	S	2	R	No data	I	new	new	4	7827	59	39	67	158	148	153	65	1225	13.001	19	3	1	1	9	100	-	-	-	-	-	rpsJ_V57M	-	-	-
ECDC_PL18_051	2018	Poland	Not stated	EuroGASP2018	PRJEB34068	ERR9837842	SAMEA5959190	No data	S	No data	R	0.38	S	0.032	S	0.032	S	2	R	No data	I	new	new	4	7827	59	39	67	158	148	153	65	1225	13.001	19	3	1	1	9	100	-	-	-	-	-	rpsJ_V57M	-	-	-
ECDC_PL18_053	2018	Poland	Not stated	EuroGASP2018	PRJEB34068	ERR9837845	SAMEA5959192	No data	S	No data	R	0.38	S	0.023	S	0.023	S	2	R	No data	I	14700	3031	4	7827	59	39	67	158	148	153	65	1225	13.001	19	3	1	1	9	100	-	-	-	-	-	rpsJ_V57M	-	-	-
ECDC_PL18_055	2018	Poland	Not stated	EuroGASP2018	PRJEB34068	ERR9837848	SAMEA5959194	No data	S	No data	R	0.5	S	0.064	S	0.047	S	3	R	No data	I	14700	3031	4	7827	59	39	67	158	148	153	65	1225	13.001	19	3	1	1	9	100	-	-	-	-	-	rpsJ_V57M	-	-	-
ECDC_PL18_060	2018	Poland	Not stated	EuroGASP2018	PRJEB34068	ERR9837659	SAMEA5959199	No data	S	No data	I	0.38	S	0.016	S	0.006	S	0.003	S	No data	I	7994	4767	29	11864	126	39	785	238	148	153	133	3725	187.001	9	1	100	100	1	100	-	-	-	-	-	rpsJ_V57M	-	-	-
ECDC_PL18_061	2018	Poland	Not stated	EuroGASP2018	PRJEB34068	ERR9837857	SAMEA5959200	No data	S	No data	R	0.19	S	0.023	S	0.016	S	0.25	R	No data	R	15589	7738	1971	1583	59	39	67	111	148	153	65	1340	43.002	122	100	100	7	6	100	-	-	-	blaTEM	tetM	rpsJ_V57M	-	-	-
ECDC_PL18_066	2018	Poland	Not stated	EuroGASP2018	PRJEB34068	ERR9837652	SAMEA5959091	No data	S	No data	R	0.25	S	0.023	S	0.016	S	0.5	R	No data	R	new	6720	1971	1583	59	39	67	111	148	153	65	2875	43.002	122	3	100	7	6	100	-	-	-	blaTEM	tetM	rpsJ_V57M	-	-	-
ECDC_PL18_067	2018	Poland	Not stated	EuroGASP2018	PRJEB34068	ERR9837824	SAMEA5959092	No data	S	No data	R	0.19	S	0.023	S	0.012	S	0.5	R	No data	R	new	new	1971	1583	59	39	67	111	148	153	65	2875	43.002	122	3	100	7	6	100	-	-	-	blaTEM	tetM	rpsJ_V57M	-	-	-
ECDC_PL18_069	2018	Poland	Not stated	EuroGASP2018	PRJEB34068	ERR9837829	SAMEA5959094	No data	S	No data	R	0.25	S	0.016	S	0.012	S	0.5	R	No data	R	14769	55	1971	1583	59	39	67	111	148	153	65	539	43.002	122	1	100	7	6	100	-	-	-	blaTEM	tetM	rpsJ_V57M	-	-	-
ECDC_PL18_070	2018	Poland	Not stated	EuroGASP2018	PRJEB34068	ERR9837654	SAMEA5959095	No data	S	No data	R	0.25	S	0.032	S	0.016	S	8	R	No data	I	15589	7738	1971	1583	59	39	67	111	148	153	65	3694	43.002	122	100	100	7	48	100	-	-	-	-	tetM	rpsJ_V57M	-	-	-
ECDC_PL18_072	2018	Poland	Not stated	EuroGASP2018	PRJEB34068	ERR9837837	SAMEA5959097	No data	S	No data	R	0.19	S	<0,016	S	0.008	S	0.5	R	No data	R	14769	55	1971	1583	59	39	67	111	148	153	65	539	43.002	122	1	100	7	6	100	-	-	-	blaTEM	tetM	rpsJ_V57M	-	-	-
ECDC_PT13_004	2013	Portugal	PT13_004	EuroGASP2013	PRJEB9227	ERR1560777	SAMEA3485566	No data	S	No data	R	1	S	0.016	S	0.012	S	32	R	No data	R	3394	997	21	1588	59	39	67	158	148	71	65	567	19.001	38	12	1	7	26	100	-	-	-	blaTEM	tetM	rpsJ_V57M	rplD_G70D	porB1b_G120K	-
ECDC_PT13_013	2013	Portugal	PT13_013	EuroGASP2013	PRJEB9227	ERR1560785	SAMEA3485574	No data	S	No data	I	1.5	S	0.016	S	0.125	S	0.004	S	No data	I	7445	28	24	9363	126	39	67	238	148	153	133	new	2.001	9	3	100	100	100	new	-	-	-	-	-	rpsJ_V57M	-	-	-
ECDC_PT13_014	2013	Portugal	PT13_014	EuroGASP2013	PRJEB9227	ERR1560786	SAMEA3485575	No data	S	No data	I	0.5	S	0.016	S	0.004	S	0.002	S	No data	I	7445	28	24	9363	126	39	67	238	148	153	133	new	2.001	9	3	100	100	100	new	-	-	-	-	-	rpsJ_V57M	-	-	-
ECDC_PT13_016	2013	Portugal	PT13_016	EuroGASP2013	PRJEB9227	ERR1560788	SAMEA3485577	No data	S	No data	R	0.125	S	0.016	S	0.008	S	0.75	R	No data	R	8907	5264	743	1588	59	39	67	158	148	71	65	53	19.001	38	1	1	7	15	100	-	-	-	blaTEM	tetM	rpsJ_V57M	-	-	-
ECDC_PT13_017	2013	Portugal	PT13_017	EuroGASP2013	PRJEB9227	ERR1560789	SAMEA3485578	No data	S	No data	I	0.125	S	0.016	S	0.003	S	0.002	S	No data	I	8154	1808	1501	9363	126	39	67	238	148	153	133	63	2.001	9	1	100	100	100	100	-	-	-	-	-	rpsJ_V57M	-	-	-
ECDC_PT13_021	2013	Portugal	PT13_021	EuroGASP2013	PRJEB9227	ERR1560793	SAMEA3485582	No data	S	No data	I	0.75	S	0.016	S	0.003	S	0.004	S	No data	I	7445	28	24	9363	126	39	67	238	148	153	133	301	2.001	9	3	100	100	100	100	-	-	-	-	-	rpsJ_V57M	-	-	-
ECDC_PT13_023	2013	Portugal	PT13_023	EuroGASP2013	PRJEB9227	ERR1560795	SAMEA3485584	No data	S	No data	R	0.064	S	0.016	S	0.012	S	1	R	No data	R	5421	161	91	1588	59	39	67	158	148	71	65	271	19.001	47	14	1	7	17	100	-	-	-	blaTEM	tetM	rpsJ_V57M	-	-	-
ECDC_PT13_028	2013	Portugal	PT13_028	EuroGASP2013	PRJEB9227	ERR1560800	SAMEA3485589	No data	S	No data	I	0.75	S	0.016	S	0.003	S	0.004	S	No data	I	7445	28	24	9363	126	39	67	238	148	153	133	301	2.001	9	3	100	100	100	100	-	-	-	-	-	rpsJ_V57M	-	-	-
ECDC_PT13_030	2013	Portugal	PT13_030	EuroGASP2013	PRJEB9227	ERR1560802	SAMEA3485591	No data	S	No data	I	0.25	S	0.016	S	0.003	S	0.004	S	No data	I	38	28	19	8163	59	39	170	111	188	71	223	947	68.001	50	3	100	100	7	100	-	-	-	-	-	rpsJ_V57M	-	-	-
ECDC_PT13_039	2013	Portugal	PT13_039	EuroGASP2013	PRJEB9227	ERR1560810	SAMEA3485599	No data	S	No data	I	0.5	S	0.016	S	0.006	S	0.002	S	No data	I	7445	28	24	9363	126	39	67	238	148	153	133	new	2.001	9	3	100	100	100	new	-	-	-	-	-	rpsJ_V57M	-	-	-
ECDC_PT13_040	2013	Portugal	PT13_040	EuroGASP2013	PRJEB9227	ERR1560811	SAMEA3485600	No data	S	No data	R	0.25	S	0.016	S	0.008	S	6	R	No data	R	3394	997	21	1588	59	39	67	158	148	71	65	247	19.001	38	12	1	7	15	100	-	-	-	blaTEM	tetM	rpsJ_V57M	rplD_G70D	porB1b_G120K	-
ECDC_PT13_041	2013	Portugal	PT13_041	EuroGASP2013	PRJEB9227	ERR1560812	SAMEA3485601	No data	S	No data	I	0.5	S	0.016	S	0.003	S	0.004	S	No data	I	2992	1808	29	11463	126	39	67	238	734	153	133	63	2.001	9	1	100	100	100	100	-	-	-	-	-	rpsJ_V57M	-	-	-
ECDC_PT13_043	2013	Portugal	PT13_043	EuroGASP2013	PRJEB9227	ERR1560814	SAMEA3485603	No data	S	No data	R	0.125	S	0.016	S	0.006	S	4	R	No data	R	1582	997	137	1588	59	39	67	158	148	71	65	247	19.001	38	12	1	7	15	100	-	-	-	blaTEM	tetM	rpsJ_V57M	-	porB1b_G120K	-
ECDC_PT13_044	2013	Portugal	PT13_044	EuroGASP2013	PRJEB9227	ERR1560815	SAMEA3485604	No data	S	No data	I	0.032	S	0.016	S	0.003	S	0.002	S	No data	I	2	2	16	11975	59	39	762	111	188	71	223	84	22.001	15	100	100	100	7	100	-	-	-	-	-	rpsJ_V57M	-	-	-
ECDC_PT13_048	2013	Portugal	PT13_048	EuroGASP2013	PRJEB9227	ERR1560819	SAMEA3485608	No data	S	No data	I	0.5	S	0.016	S	0.006	S	0.003	S	No data	I	7445	28	24	9363	126	39	67	238	148	153	133	301	2.001	9	3	100	100	100	100	-	-	-	-	-	rpsJ_V57M	-	-	-
ECDC_PT13_057	2013	Portugal	PT13_057	EuroGASP2013	PRJEB9227	ERR1560827	SAMEA3485616	No data	S	No data	I	0.75	S	0.016	S	0.006	S	0.003	S	No data	I	7445	28	24	9363	126	39	67	238	148	153	133	new	2.001	9	3	100	100	100	new	-	-	-	-	-	rpsJ_V57M	-	-	-
ECDC_PT13_059	2013	Portugal	PT13_059	EuroGASP2013	PRJEB9227	ERR1560828	SAMEA3485617	No data	S	No data	I	0.094	S	0.016	S	0.002	S	0.004	S	No data	I	38	28	19	8163	59	39	170	111	188	71	223	947	68.001	50	3	100	100	7	100	-	-	-	-	-	rpsJ_V57M	-	-	-
ECDC_PT13_062	2013	Portugal	PT13_062	EuroGASP2013	PRJEB9227	ERR1560831	SAMEA3485620	No data	S	No data	I	0.75	S	0.016	S	0.003	S	0.004	S	No data	I	7445	28	24	9363	126	39	67	238	148	153	133	new	2.001	9	3	100	100	100	new	-	-	-	-	-	rpsJ_V57M	-	-	-
ECDC_PT13_066	2013	Portugal	PT13_066	EuroGASP2013	PRJEB9227	ERR1560835	SAMEA3485624	No data	S	No data	I	0.75	S	0.016	S	0.002	S	0.002	S	No data	I	7445	28	24	9363	126	39	67	238	148	153	133	301	2.001	9	3	100	100	100	100	-	-	-	-	-	rpsJ_V57M	-	-	-
ECDC_PT13_074	2013	Portugal	PT13_074	EuroGASP2013	PRJEB9227	ERR1560842	SAMEA3485631	No data	S	No data	S	0.125	S	0.016	S	0.004	S	0.003	S	No data	I	new	new	16	11988	128	39	67	78	147	153	65	991	90.001	18	100	100	100	2	100	-	-	-	-	-	-	-	-	-
ECDC_PT13_076	2013	Portugal	PT13_076	EuroGASP2013	PRJEB9227	ERR1560844	SAMEA3485633	No data	S	No data	I	0.38	S	0.016	S	0.003	S	0.004	S	No data	I	8154	1808	1501	9363	126	39	67	238	148	153	133	63	2.001	9	1	100	100	100	100	-	-	-	-	-	rpsJ_V57M	-	-	-
ECDC_PT13_077	2013	Portugal	PT13_077	EuroGASP2013	PRJEB9227	ERR1560845	SAMEA3485634	No data	S	No data	I	0.75	S	0.016	S	0.004	S	0.003	S	No data	I	11500	6740	24	9363	126	39	67	238	148	153	133	new	2.001	9	1	100	100	100	new	-	-	-	-	-	rpsJ_V57M	-	-	-
ECDC_PT13_080	2013	Portugal	PT13_080	EuroGASP2013	PRJEB9227	ERR1560848	SAMEA3485637	No data	S	No data	R	0.094	S	0.016	S	0.002	S	8	R	No data	R	7414	4444	1412	11956	59	39	67	78	149	154	65	949	69.001	54	14	100	7	20	100	-	-	-	blaTEM	tetM	rpsJ_V57M	-	-	-
ECDC_PT13_082	2013	Portugal	PT13_082	EuroGASP2013	PRJEB9227	ERR1560850	SAMEA3485639	No data	S	No data	I	0.75	S	0.016	S	0.003	S	0.006	S	No data	I	7445	28	24	9363	126	39	67	238	148	153	133	983	2.018	9	3	100	100	100	100	-	-	-	-	-	rpsJ_V57M	-	-	-
ECDC_PT13_089	2013	Portugal	PT13_089	EuroGASP2013	PRJEB9227	ERR1560857	SAMEA3485646	No data	S	No data	R	0.064	S	0.016	S	0.002	S	0.003	S	No data	I	8147	4837	1500	8123	59	39	170	78	148	153	65	887	2.002	10	100	1	100	1	100	-	-	-	-	tetM	rpsJ_V57M	-	-	-
ECDC_PT13_094	2013	Portugal	PT13_094	EuroGASP2013	PRJEB9227	ERR1560862	SAMEA3485651	No data	S	No data	R	0.125	S	0.016	S	0.002	S	3	R	No data	I	2	2	16	1588	59	39	67	158	148	71	65	870	19.001	15	100	1	7	15	100	-	-	-	-	tetM	rpsJ_V57M	-	-	-
ECDC_PT13_098	2013	Portugal	PT13_098	EuroGASP2013	PRJEB9227	ERR1560865	SAMEA3485654	No data	S	No data	R	0.19	S	0.016	S	0.003	S	3	R	No data	I	10053	4837	16	1588	59	39	67	158	148	71	65	870	19.001	15	100	1	7	15	100	-	-	-	-	tetM	rpsJ_V57M	-	-	-
ECDC_PT13_104	2013	Portugal	PT13_104	EuroGASP2013	PRJEB9227	ERR1560871	SAMEA3485660	No data	S	No data	I	0.5	S	0.016	S	0.003	S	3	R	No data	R	5624	90	953	8143	59	39	170	78	146	154	65	426	2.002	40	13	100	7	4	100	-	-	-	blaTEM	-	rpsJ_V57M	-	-	-
ECDC_PT13_107	2013	Portugal	PT13_107	EuroGASP2013	PRJEB9227	ERR1560874	SAMEA3485663	No data	S	No data	R	0.125	S	0.016	S	0.016	S	3	R	No data	R	new	new	new	7363	59	39	67	78	148	153	65	975	2.001	172	16	1	1	4	100	-	-	-	blaTEM	tetM	rpsJ_V57M	-	-	-
ECDC_PT13_108	2013	Portugal	PT13_108	EuroGASP2013	PRJEB9227	ERR1560875	SAMEA3485664	No data	S	No data	I	0.047	S	0.016	S	0.002	S	0.003	S	No data	I	2	2	16	11975	59	39	762	111	188	71	223	84	22.001	15	100	100	100	7	100	-	-	-	-	-	rpsJ_V57M	-	-	-
ECDC_PT13_109	2013	Portugal	PT13_109	EuroGASP2013	PRJEB9227	ERR1560876	SAMEA3485665	No data	S	No data	R	0.125	S	0.016	S	0.002	S	3	R	No data	I	10053	4837	16	1588	59	39	67	158	148	71	65	870	19.001	15	100	1	7	15	100	-	-	-	-	tetM	rpsJ_V57M	-	-	-
ECDC_PT13_110	2013	Portugal	PT13_110	EuroGASP2013	PRJEB9227	ERR1560877	SAMEA3485666	No data	S	No data	I	1.5	S	0.016	S	0.003	S	0.006	S	No data	I	7445	28	24	9363	126	39	67	238	148	153	133	new	12.007	9	3	100	100	100	new	-	-	-	-	-	rpsJ_V57M	-	-	-
ECDC_PT13_116	2013	Portugal	PT13_116	EuroGASP2013	PRJEB9227	ERR1560881	SAMEA3485670	No data	S	No data	I	0.125	S	0.016	S	0.002	S	0.003	S	No data	I	10057	3696	110	9362	126	39	67	238	147	153	133	new	2.001	9	1	100	100	100	new	-	-	-	-	-	rpsJ_V57M	-	-	-
ECDC_PT13_118	2013	Portugal	PT13_118	EuroGASP2013	PRJEB9227	ERR1560882	SAMEA3485671	No data	S	No data	I	0.75	S	0.016	S	0.002	S	0.004	S	No data	I	7445	28	24	9363	126	39	67	238	148	153	133	301	2.001	9	3	100	100	100	100	-	-	-	-	-	rpsJ_V57M	-	-	-
ECDC_PT18_387	2018	Portugal	Not stated	EuroGASP2018	PRJEB34068	ERR9837378	SAMEA5958216	No data	S	No data	R	0.38	S	0.016	S	0.016	S	1	R	No data	R	new	1505	new	11181	109	39	67	78	147	153	65	3649	14.001	420	12	100	1	2	100	-	-	-	blaTEM	tetM	rpsJ_V57M	-	porB1b_G120K	-
ECDC_PT18_392	2018	Portugal	Not stated	EuroGASP2018	PRJEB34068	ERR9837216	SAMEA5958221	No data	S	No data	I	0.75	S	<0,016	S	0.006	S	3	R	No data	I	7829	2649	1166	1902	109	39	170	158	148	153	65	3627	12.001	35	100	1	1	3	100	-	-	-	-	-	rpsJ_V57M	-	-	-
ECDC_PT18_405	2018	Portugal	Not stated	EuroGASP2018	PRJEB34068	ERR9837227	SAMEA5958241	No data	S	No data	I	0.032	S	<0,016	S	<0,002	S	0.003	S	No data	I	2	2	16	11975	59	39	762	111	188	71	223	84	22.001	15	100	100	100	7	100	-	-	-	-	-	rpsJ_V57M	-	-	-
ECDC_PT18_406	2018	Portugal	Not stated	EuroGASP2018	PRJEB34068	ERR9837400	SAMEA5958242	No data	S	No data	R	0.38	S	<0,016	S	0.006	S	0.5	R	No data	R	15589	7738	1971	1583	59	39	67	111	148	153	65	1340	43.002	122	100	100	7	6	100	-	-	-	blaTEM	tetM	rpsJ_V57M	-	-	-
ECDC_PT18_408	2018	Portugal	Not stated	EuroGASP2018	PRJEB34068	ERR9837778	SAMEA5958244	No data	S	No data	R	0.094	S	<0,016	S	0.003	S	3	R	No data	I	new	new	16	1588	59	39	67	158	148	71	65	3667	19.001	15	14	1	7	15	100	-	-	-	-	tetM	rpsJ_V57M	-	-	-
ECDC_PT18_413	2018	Portugal	Not stated	EuroGASP2018	PRJEB34068	ERR9837408	SAMEA5958249	No data	S	No data	R	0.38	S	<0,016	S	0.006	S	0.75	R	No data	R	15589	7738	1971	1583	59	39	67	111	148	153	65	1340	43.002	122	100	100	7	6	100	-	-	-	blaTEM	tetM	rpsJ_V57M	-	-	-
ECDC_PT18_419	2018	Portugal	Not stated	EuroGASP2018	PRJEB34068	ERR9837229	SAMEA5958255	No data	S	No data	I	0.047	S	<0,016	S	0.003	S	0.004	S	No data	I	2	2	16	11975	59	39	762	111	188	71	223	84	22.001	15	100	100	100	7	100	-	-	-	-	-	rpsJ_V57M	-	-	-
ECDC_PT18_425	2018	Portugal	Not stated	EuroGASP2018	PRJEB34068	ERR9837233	SAMEA5958261	No data	S	No data	R	0.25	S	<0,016	S	0.008	S	0.75	R	No data	R	new	new	1971	1583	59	39	67	111	148	153	65	1340	43.002	122	100	100	7	6	100	-	-	-	blaTEM	tetM	rpsJ_V57M	-	-	-
ECDC_PT18_429	2018	Portugal	Not stated	EuroGASP2018	PRJEB34068	ERR9837240	SAMEA5958265	No data	S	No data	I	1.5	S	<0,016	S	0.002	S	0.003	S	No data	I	new	2616	29	9363	126	39	67	238	148	153	133	3632	12.007	9	14	100	100	100	100	-	-	-	-	-	rpsJ_V57M	-	-	-
ECDC_PT18_431	2018	Portugal	Not stated	EuroGASP2018	PRJEB34068	ERR9837449	SAMEA5958267	No data	S	No data	R	0.094	S	<0,016	S	<0,002	S	6	R	No data	R	new	4444	602	11956	59	39	67	78	149	154	65	949	69.001	54	14	100	7	20	100	-	-	-	blaTEM	tetM	rpsJ_V57M	-	-	-
ECDC_PT18_435	2018	Portugal	Not stated	EuroGASP2018	PRJEB34068	ERR9837465	SAMEA5958271	No data	S	No data	R	0.032	S	<0,016	S	0.002	S	1	R	No data	R	new	1505	new	11181	109	39	67	78	147	153	65	3650	14.001	420	12	100	1	4	100	-	-	-	blaTEM	tetM	rpsJ_V57M	-	porB1b_G120K	-
ECDC_PT18_438	2018	Portugal	Not stated	EuroGASP2018	PRJEB34068	ERR9837474	SAMEA5958274	No data	S	No data	I	2	R	<0,016	S	0.004	S	0.012	S	No data	I	new	new	29	11422	109	39	67	238	148	153	133	2953	2.001	39	8	100	100	100	100	-	-	-	-	-	rpsJ_V57M	-	porB1b_G120K	porB1b_A121D
ECDC_PT18_439	2018	Portugal	Not stated	EuroGASP2018	PRJEB34068	ERR9837242	SAMEA5958275	No data	S	No data	R	2	S	<0,016	S	<0,002	S	0.004	S	No data	R	new	new	29	9363	126	39	67	238	148	153	133	3578	2.001	183	4	100	100	100	100	-	-	-	-	-	rpsJ_V57M	-	-	-
ECDC_PT18_441	2018	Portugal	Not stated	EuroGASP2018	PRJEB34068	ERR9837482	SAMEA5958277	No data	S	No data	I	0.047	S	<0,016	S	0.004	S	0.003	S	No data	I	2	2	16	11975	59	39	762	111	188	71	223	84	22.001	15	100	100	100	7	100	-	-	-	-	-	rpsJ_V57M	-	-	-
ECDC_PT18_442	2018	Portugal	Not stated	EuroGASP2018	PRJEB34068	ERR9837485	SAMEA5958278	No data	S	No data	R	0.25	S	<0,016	S	0.006	S	0.5	R	No data	R	15589	7738	1971	1583	59	39	67	111	148	153	65	1340	43.002	122	100	100	7	6	100	-	-	-	blaTEM	tetM	rpsJ_V57M	-	-	-
ECDC_PT18_443	2018	Portugal	Not stated	EuroGASP2018	PRJEB34068	ERR9837488	SAMEA5958279	No data	S	No data	I	0.19	S	<0,016	S	0.002	S	4	R	No data	I	new	435	4	1583	59	39	67	111	148	153	65	1273	2.001	25	3	100	1	4	100	-	-	-	-	-	rpsJ_V57M	-	-	-
ECDC_PT18_449	2018	Portugal	Not stated	EuroGASP2018	PRJEB34068	ERR9837508	SAMEA5958281	No data	S	No data	I	0.5	S	<0,016	S	0.002	S	2	R	No data	R	568	90	33	8143	59	39	170	78	146	154	65	426	2.002	40	13	100	7	4	100	-	-	-	blaTEM	-	rpsJ_V57M	-	-	-
ECDC_PT18_453	2018	Portugal	Not stated	EuroGASP2018	PRJEB34068	ERR9837515	SAMEA5958285	No data	S	No data	R	2	S	<0,016	S	<0,002	S	0.003	S	No data	R	new	new	29	9363	126	39	67	238	148	153	133	3578	2.001	183	4	100	100	100	100	-	-	-	-	-	rpsJ_V57M	-	-	-
ECDC_PT18_457	2018	Portugal	Not stated	EuroGASP2018	PRJEB34068	ERR9837252	SAMEA5958289	No data	S	No data	R	0.047	S	<0,016	S	0.003	S	2	R	No data	I	new	new	16	1588	59	39	67	158	148	71	65	3723	185.001	15	100	1	7	15	100	-	-	-	-	tetM	rpsJ_V57M	-	-	-
ECDC_PT18_458	2018	Portugal	Not stated	EuroGASP2018	PRJEB34068	ERR9837527	SAMEA5958290	No data	S	No data	I	0.25	S	<0,016	S	0.006	S	0.75	R	No data	R	new	123	717	1588	59	39	67	158	148	71	65	271	19.001	47	14	1	7	17	100	-	-	-	blaTEM	-	rpsJ_V57M	-	-	-
ECDC_PT18_459	2018	Portugal	Not stated	EuroGASP2018	PRJEB34068	ERR9837254	SAMEA5958291	No data	S	No data	I	0.047	S	<0,016	S	<0,002	S	0.003	S	No data	I	2	2	16	11975	59	39	762	111	188	71	223	84	22.001	15	100	100	100	7	100	-	-	-	-	-	rpsJ_V57M	-	-	-
ECDC_PT18_464	2018	Portugal	Not stated	EuroGASP2018	PRJEB34068	ERR9837546	SAMEA5958296	No data	S	No data	R	0.064	S	<0,016	S	<0,002	S	0.5	R	No data	R	new	new	new	1588	59	39	67	158	148	71	65	433	19.001	47	3	1	7	17	100	-	-	-	blaTEM	tetM	rpsJ_V57M	-	-	-
ECDC_PT18_467	2018	Portugal	Not stated	EuroGASP2018	PRJEB34068	ERR9837258	SAMEA5958299	No data	S	No data	I	0.064	S	<0,016	S	<0,002	S	0.003	S	No data	I	new	7259	16	11975	59	39	762	111	188	71	223	84	22.001	15	100	100	100	7	100	-	-	-	-	-	rpsJ_V57M	-	-	-
ECDC_PT18_469	2018	Portugal	Not stated	EuroGASP2018	PRJEB34068	ERR9837260	SAMEA5958301	No data	S	No data	I	0.5	S	<0,016	S	<0,002	S	0.003	S	No data	I	new	new	18	15987	59	39	785	156	148	153	133	439	2.001	9	1	100	100	1	100	-	-	-	-	-	rpsJ_V57M	-	-	-
ECDC_PT18_475	2018	Portugal	Not stated	EuroGASP2018	PRJEB34068	ERR9837566	SAMEA5958307	No data	S	No data	R	0.094	S	<0,016	S	0.004	S	2	R	No data	I	new	new	137	16425	59	39	67	9	148	71	65	2076	19.001	88	100	1	7	15	100	-	-	-	-	tetM	rpsJ_V57M	-	-	-
ECDC_PT18_477	2018	Portugal	Not stated	EuroGASP2018	PRJEB34068	ERR9837574	SAMEA5958309	No data	S	No data	R	0.38	S	<0,016	S	0.006	S	0.75	R	No data	R	15589	7738	1971	1583	59	39	67	111	148	153	65	1340	43.002	122	100	100	7	6	100	-	-	-	blaTEM	tetM	rpsJ_V57M	-	-	-
ECDC_PT18_479	2018	Portugal	Not stated	EuroGASP2018	PRJEB34068	ERR9837578	SAMEA5958311	No data	S	No data	I	2	R	<0,016	S	0.003	S	0.004	S	No data	I	new	7738	241	11422	109	39	67	238	148	153	133	211	2.001	39	100	100	100	100	100	-	-	-	-	-	rpsJ_V57M	-	-	-
ECDC_PT18_480	2018	Portugal	Not stated	EuroGASP2018	PRJEB34068	ERR9837581	SAMEA5958312	No data	S	No data	R	0.094	S	<0,016	S	0.002	S	2	R	No data	I	new	new	16	1588	59	39	67	158	148	71	65	3667	19.001	15	14	1	7	15	100	-	-	-	-	tetM	rpsJ_V57M	-	-	-
ECDC_PT18_482	2018	Portugal	Not stated	EuroGASP2018	PRJEB34068	ERR9837585	SAMEA5958314	No data	S	No data	I	4	R	<0,016	S	0.006	S	>32	R	No data	I	12302	908	267	9363	126	39	67	238	148	153	133	168	2.001	39	11	100	7	4	100	-	-	-	-	-	rpsJ_V57M	-	porB1b_G120K	-
ECDC_PT18_485	2018	Portugal	Not stated	EuroGASP2018	PRJEB34068	ERR9837591	SAMEA5958317	No data	S	No data	I	1.5	R	<0,016	S	0.004	S	0.012	S	No data	I	3935	908	29	11422	109	39	67	238	148	153	133	193	2.001	39	11	100	100	100	100	-	-	-	-	-	rpsJ_V57M	-	porB1b_G120K	-
ECDC_RB13000567	2013	United Kingdom	RB13000567	EuroGASP2013	PRJEB9227	ERR1549762	SAMEA3468119	No data	S	No data	I	0.125	S	0.008	S	0.008	S	0.03	S	No data	I	995	28	29	11999	126	39	67	111	148	783	133	245	2.001	9	3	1	100	100	100	-	-	-	-	-	rpsJ_V57M	-	-	-
ECDC_RB13000568	2013	United Kingdom	RB13000568	EuroGASP2013	PRJEB9227	ERR1549763	SAMEA3468121	No data	S	No data	I	0.125	S	0.008	S	0.002	S	0.03	S	No data	I	995	28	29	11999	126	39	67	111	148	783	133	245	2.001	9	3	1	100	100	100	-	-	-	-	-	rpsJ_V57M	-	-	-
ECDC_RB13000570	2013	United Kingdom	RB13000570	EuroGASP2013	PRJEB9227	ERR1549764	SAMEA3468123	No data	S	No data	I	0.25	S	0.008	S	0.004	S	0.03	S	No data	I	2992	1808	29	9363	126	39	67	238	148	153	133	63	2.001	9	1	100	100	100	100	-	-	-	-	-	rpsJ_V57M	-	-	-
ECDC_RB13000573	2013	United Kingdom	RB13000573	EuroGASP2013	PRJEB9227	ERR1549767	SAMEA3468129	No data	S	No data	R	0.125	S	0.03	S	0.03	S	16	R	No data	R	9362	3846	1491	11231	59	39	67	78	147	154	65	428	18.001	1	8	1	7	3	100	-	-	-	-	-	rpsJ_V57M	-	porB1b_G120K	porB1b_A121D
ECDC_RB13000575	2013	United Kingdom	RB13000575	EuroGASP2013	PRJEB9227	ERR1621696	SAMEA3507426	No data	S	No data	I	0.25	S	0.004	S	0.002	S	0.03	S	No data	I	11003	134	29	9363	126	39	67	238	148	153	133	63	2.001	9	1	100	100	100	100	-	-	-	-	-	rpsJ_V57M	-	-	-
ECDC_RB13001545	2013	United Kingdom	RB13001545	EuroGASP2013	PRJEB9227	ERR1621697	SAMEA3507427	No data	S	No data	R	0.25	S	0.008	S	0.002	S	0.03	S	No data	I	2992	1808	29	11463	126	39	67	238	734	153	133	new	2.001	1	1	100	100	100	new	-	-	-	-	-	rpsJ_V57M	-	-	-
ECDC_RB13001547	2013	United Kingdom	RB13001547	EuroGASP2013	PRJEB9227	ERR1549778	SAMEA3468156	No data	S	No data	I	0.125	S	0.008	S	0.002	S	0.03	S	No data	I	11609	6802	29	1580	126	39	67	111	148	153	133	301	2.001	9	3	100	100	100	100	-	-	-	-	-	rpsJ_V57M	-	-	-
ECDC_RB13001559	2013	United Kingdom	RB13001559	EuroGASP2013	PRJEB9227	ERR1621698	SAMEA3507428	No data	S	No data	I	0.25	S	0.008	S	0.004	S	0.03	S	No data	I	2992	1808	29	9363	126	39	67	238	148	153	133	new	2.001	9	1	100	100	100	new	-	-	-	-	-	rpsJ_V57M	-	-	-
ECDC_RB13001584	2013	United Kingdom	RB13001584	EuroGASP2013	PRJEB9227	ERR1621699	SAMEA3507429	No data	S	No data	R	0.25	S	0.008	S	0.004	S	0.03	S	No data	I	2992	1808	29	11463	126	39	67	238	734	153	133	new	2.001	1	1	100	100	100	new	-	-	-	-	-	rpsJ_V57M	-	-	-
ECDC_RB13001585	2013	United Kingdom	RB13001585	EuroGASP2013	PRJEB9227	ERR1621700	SAMEA3507430	No data	S	No data	R	0.125	S	0.008	S	0.004	S	8	R	No data	R	1317	851	272	1925	126	39	170	78	148	154	65	new	2.002	174	8	100	1	4	new	-	-	-	-	tetM	rpsJ_V57M	-	porB1b_G120K	porB1b_A121D
ECDC_RB13001678	2013	United Kingdom	RB13001678	EuroGASP2013	PRJEB9227	ERR1549786	SAMEA3468178	No data	S	No data	I	0.25	S	0.004	S	0.002	S	0.03	S	No data	I	8642	3059	27	9362	126	39	67	238	147	153	133	new	2.001	9	1	100	100	100	new	-	-	-	-	-	rpsJ_V57M	-	-	-
ECDC_RB13001691	2013	United Kingdom	RB13001691	EuroGASP2013	PRJEB9227	ERR1549788	SAMEA3468182	No data	S	No data	R	0.25	S	0.008	S	0.004	S	8	R	No data	I	2487	1534	241	1582	59	39	170	78	148	154	65	896	2.002	19	100	100	1	18	100	-	-	-	-	-	rpsJ_V57M	-	-	-
ECDC_RB13001951	2013	United Kingdom	RB13001951	EuroGASP2013	PRJEB9227	ERR1549791	SAMEA3468188	No data	S	No data	I	0.25	S	0.015	S	0.008	S	0.03	S	No data	I	11023	6434	29	9363	126	39	67	238	148	153	133	new	2.001	9	1	1	100	100	new	-	-	-	-	-	rpsJ_V57M	-	-	-
ECDC_RB13001955	2013	United Kingdom	RB13001955	EuroGASP2013	PRJEB9227	ERR1555156	SAMEA3468194	No data	S	No data	I	0.125	S	0.008	S	0.004	S	0.03	S	No data	I	995	28	29	11999	126	39	67	111	148	783	133	245	2.001	9	3	1	100	100	100	-	-	-	-	-	rpsJ_V57M	-	-	-
ECDC_RB13001959	2013	United Kingdom	RB13001959	EuroGASP2013	PRJEB9227	ERR1555160	SAMEA3468202	No data	S	No data	I	0.5	S	0.015	S	0.008	S	0.03	S	No data	I	2992	1808	29	9362	126	39	67	238	147	153	133	new	2.001	9	1	100	100	100	new	-	-	-	-	-	rpsJ_V57M	-	-	-
ECDC_RB13001960	2013	United Kingdom	RB13001960	EuroGASP2013	PRJEB9227	ERR1555161	SAMEA3468204	No data	S	No data	I	0.25	S	0.008	S	0.004	S	0.03	S	No data	I	2992	1808	29	9363	126	39	67	238	148	153	133	63	2.001	9	1	100	100	100	100	-	-	-	-	-	rpsJ_V57M	-	-	-
ECDC_RB13001961	2013	United Kingdom	RB13001961	EuroGASP2013	PRJEB9227	ERR1555162	SAMEA3468205	No data	S	No data	I	0.25	S	0.008	S	0.004	S	0.03	S	No data	I	2992	1808	29	11463	126	39	67	238	734	153	133	63	2.001	9	1	100	100	100	100	-	-	-	-	-	rpsJ_V57M	-	-	-
ECDC_RB13001963	2013	United Kingdom	RB13001963	EuroGASP2013	PRJEB9227	ERR1555164	SAMEA3468208	No data	S	No data	I	0.5	S	0.015	S	0.008	S	0.03	S	No data	I	3935	908	29	11420	126	39	4	238	148	153	133	new	2.001	9	11	100	100	100	new	-	-	-	-	-	rpsJ_V57M	-	porB1b_G120K	-
ECDC_RB13001965	2013	United Kingdom	RB13001965	EuroGASP2013	PRJEB9227	ERR1555166	SAMEA3468212	No data	S	No data	I	0.125	S	0.015	S	0.008	S	0.03	S	No data	I	11004	6426	25	1893	59	39	67	157	147	153	133	373	9.001	25	8	1	100	2	100	-	-	-	-	-	rpsJ_V57M	-	porB1b_G120K	porB1b_A121D
ECDC_RB13001967	2013	United Kingdom	RB13001967	EuroGASP2013	PRJEB9227	ERR1555167	SAMEA3468214	No data	S	No data	R	0.25	S	0.064	S	0.015	S	4	R	No data	I	8845	1808	4	7827	59	39	67	158	148	153	65	175	13.001	19	1	1	1	9	100	-	-	-	-	-	rpsJ_V57M	-	-	-
ECDC_RB13001983	2013	United Kingdom	RB13001983	EuroGASP2013	PRJEB9227	ERR1555179	SAMEA3468238	No data	S	No data	I	0.125	S	0.008	S	0.002	S	0.03	S	No data	I	5294	3205	19	8149	59	39	67	111	188	71	223	681	22.001	104	100	100	100	7	100	-	-	-	-	-	rpsJ_V57M	-	-	-
ECDC_RB13001987	2013	United Kingdom	RB13001987	EuroGASP2013	PRJEB9227	ERR1555182	SAMEA3468241	No data	S	No data	I	0.25	S	0.015	S	0.002	S	0.03	S	No data	I	2992	1808	29	11428	126	39	170	238	734	153	133	new	2.001	9	1	100	100	100	new	-	-	-	-	-	rpsJ_V57M	-	-	-
ECDC_RB13001994	2013	United Kingdom	RB13001994	EuroGASP2013	PRJEB9227	ERR1555188	SAMEA3468247	No data	S	No data	I	0.38	S	0.016	S	0.012	S	0.06	S	No data	I	10419	1873	29	9363	126	39	67	238	148	153	133	954	80.001	9	1	100	100	100	100	-	-	-	-	-	rpsJ_V57M	-	-	-
ECDC_RB13001996	2013	United Kingdom	RB13001996	EuroGASP2013	PRJEB9227	ERR1555190	SAMEA3468249	No data	S	No data	I	0.25	S	0.008	S	0.004	S	0.03	S	No data	I	2992	1808	29	11428	126	39	170	238	734	153	133	new	2.001	9	1	100	100	100	new	-	-	-	-	-	rpsJ_V57M	-	-	-
ECDC_RB13001999	2013	United Kingdom	RB13001999	EuroGASP2013	PRJEB9227	ERR1555193	SAMEA3468252	No data	S	No data	I	0.25	S	0.008	S	0.004	S	0.03	S	No data	I	10419	1873	29	9363	126	39	67	238	148	153	133	new	80.001	9	1	100	100	100	new	-	-	-	-	-	rpsJ_V57M	-	-	-
ECDC_RB13002151	2013	United Kingdom	RB13002151	EuroGASP2013	PRJEB9227	ERR1555204	SAMEA3468263	No data	S	No data	I	0.03	S	0.015	S	0.004	S	0.03	S	No data	I	2	2	16	8163	59	39	170	111	188	71	223	84	22.001	15	100	100	100	7	100	-	-	-	-	-	rpsJ_V57M	-	-	-
ECDC_RB13002200	2013	United Kingdom	RB13002200	EuroGASP2013	PRJEB9227	ERR1555205	SAMEA3468264	No data	S	No data	I	0.125	S	0.015	S	0.008	S	0.03	S	No data	I	7445	28	24	9363	126	39	67	238	148	153	133	new	2.001	9	3	100	100	100	new	-	-	-	-	-	rpsJ_V57M	-	-	-
ECDC_RB13002208	2013	United Kingdom	RB13002208	EuroGASP2013	PRJEB9227	ERR1555208	SAMEA3468267	No data	S	No data	I	0.125	S	0.008	S	0.004	S	0.03	S	No data	I	730	59	29	9363	126	39	67	238	148	153	133	new	2.001	9	3	100	100	100	new	-	-	-	-	-	rpsJ_V57M	-	-	-
ECDC_RB13002311	2013	United Kingdom	RB13002311	EuroGASP2013	PRJEB9227	ERR1555216	SAMEA3468275	No data	S	No data	I	0.25	S	0.015	S	0.004	S	0.03	S	No data	I	2992	1808	29	9363	126	39	67	238	148	153	133	new	2.001	9	1	100	100	100	new	-	-	-	-	-	rpsJ_V57M	-	-	-
ECDC_RB13002323	2013	United Kingdom	RB13002323	EuroGASP2013	PRJEB9227	ERR1555217	SAMEA3468276	No data	S	No data	I	0.125	S	0.015	S	0.002	S	0.03	S	No data	I	9705	715	316	8163	59	39	170	111	188	71	223	84	22.001	15	100	100	100	7	100	-	-	-	-	-	rpsJ_V57M	-	-	-
ECDC_RB13002397	2013	United Kingdom	RB13002397	EuroGASP2013	PRJEB9227	ERR1555219	SAMEA3468278	No data	S	No data	I	0.25	S	0.008	S	0.004	S	0.03	S	No data	I	2992	1808	29	9363	126	39	67	238	148	153	133	new	2.001	9	1	100	100	100	new	-	-	-	-	-	rpsJ_V57M	-	-	-
ECDC_SE13_055	2013	Sweden	SE13_055	EuroGASP2013	PRJEB9227	ERR1528189	SAMEA3431891	No data	S	No data	I	0.19	S	0.016	S	0.004	S	4	R	No data	R	10001	488	186	8143	59	39	170	78	146	154	65	898	2.002	40	100	100	1	4	100	-	-	-	blaTEM	-	rpsJ_V57M	-	-	-
ECDC_SE13_058	2013	Sweden	SE13_058	EuroGASP2013	PRJEB9227	ERR1528192	SAMEA3431897	No data	S	No data	I	0.19	S	0.016	S	0.008	S	0.006	S	No data	I	995	28	29	11999	126	39	67	111	148	783	133	245	2.001	9	3	1	100	100	100	-	-	-	-	-	rpsJ_V57M	-	-	-
ECDC_SE13_059	2013	Sweden	SE13_059	EuroGASP2013	PRJEB9227	ERR1528193	SAMEA3431899	No data	S	No data	R	0.125	S	0.032	S	0.032	S	32	R	No data	R	10002	3003	137	1588	59	39	67	158	148	71	65	874	19.001	38	11	1	7	55	100	-	-	-	blaTEM	tetM	rpsJ_V57M	-	porB1b_G120K	-
ECDC_SE13_066	2013	Sweden	SE13_066	EuroGASP2013	PRJEB9227	ERR1528200	SAMEA3431912	No data	S	No data	I	0.5	S	0.016	S	0.006	S	0.006	S	No data	I	7445	28	24	9363	126	39	67	238	148	153	133	new	2.001	9	3	100	100	100	new	-	-	-	-	-	rpsJ_V57M	-	-	-
ECDC_SE13_068	2013	Sweden	SE13_068	EuroGASP2013	PRJEB9227	ERR1528202	SAMEA3431916	No data	S	No data	R	0.25	S	0.023	S	0.032	S	32	R	No data	R	6974	908	137	1588	59	39	67	158	148	71	65	874	19.001	38	11	1	7	55	100	-	-	-	blaTEM	tetM	rpsJ_V57M	-	porB1b_G120K	-
ECDC_SE13_070	2013	Sweden	SE13_070	EuroGASP2013	PRJEB9227	ERR1528211	SAMEA3431929	No data	S	No data	R	0.125	S	0.016	S	0.003	S	4	R	No data	R	10012	103	334	8784	59	39	170	190	147	154	65	891	2.002	18	14	100	1	18	100	-	-	-	blaTEM	tetM	rpsJ_V57M	-	-	-
ECDC_SE13_071	2013	Sweden	SE13_071	EuroGASP2013	PRJEB9227	ERR1528205	SAMEA3431923	No data	S	No data	I	0.5	S	0.016	S	0.003	S	0.006	S	No data	I	4758	1808	49	9363	126	39	67	238	148	153	133	new	2.001	9	1	100	100	100	new	-	-	-	-	-	rpsJ_V57M	-	-	-
ECDC_SE13_072	2013	Sweden	SE13_072	EuroGASP2013	PRJEB9227	ERR1528206	SAMEA3431924	No data	S	No data	I	0.5	S	0.016	S	0.003	S	0.003	S	No data	I	2992	1808	29	11428	126	39	170	238	734	153	133	new	2.001	9	1	100	100	100	new	-	-	-	-	-	rpsJ_V57M	-	-	-
ECDC_SE13_081	2013	Sweden	SE13_081	EuroGASP2013	PRJEB9227	ERR1528223	SAMEA3431941	No data	S	No data	R	0.25	S	0.016	S	0.023	S	32	R	No data	R	6974	908	137	1588	59	39	67	158	148	71	65	874	19.001	38	11	1	7	55	100	-	-	-	blaTEM	tetM	rpsJ_V57M	-	porB1b_G120K	-
ECDC_SE13_082	2013	Sweden	SE13_082	EuroGASP2013	PRJEB9227	ERR1528222	SAMEA3431940	No data	S	No data	R	0.125	S	0.016	S	0.008	S	2	R	No data	R	1479	147	91	1588	59	39	67	158	148	71	65	271	19.001	47	14	1	7	17	100	-	-	-	blaTEM	tetM	rpsJ_V57M	-	-	-
ECDC_SE13_086	2013	Sweden	SE13_086	EuroGASP2013	PRJEB9227	ERR1528299	SAMEA3431894	No data	S	No data	I	1	S	0.016	S	0.006	S	0.006	S	No data	I	7445	28	24	9363	126	39	67	238	148	153	133	new	2.001	9	3	100	100	100	new	-	-	-	-	-	rpsJ_V57M	-	-	-
ECDC_SE13_091	2013	Sweden	SE13_091	EuroGASP2013	PRJEB9227	ERR1528304	SAMEA3431905	No data	S	No data	R	0.19	S	0.016	S	0.008	S	32	R	No data	R	217	158	4	1583	59	39	67	111	148	153	65	438	2.001	25	8	100	1	4	100	-	-	-	blaTEM	tetM	rpsJ_V57M	-	porB1b_G120K	porB1b_A121D
ECDC_SE13_093	2013	Sweden	SE13_093	EuroGASP2013	PRJEB9227	ERR1528306	SAMEA3431909	No data	S	No data	I	0.19	S	0.016	S	0.004	S	0.004	S	No data	I	1313	847	29	1580	126	39	67	111	148	153	133	301	2.001	9	3	100	100	100	100	-	-	-	-	-	rpsJ_V57M	-	-	-
ECDC_SE13_097	2013	Sweden	SE13_097	EuroGASP2013	PRJEB9227	ERR1528310	SAMEA3431917	No data	S	No data	I	1	S	0.016	S	0.004	S	0.004	S	No data	I	7445	28	24	9363	126	39	67	238	148	153	133	new	2.001	9	3	100	100	100	new	-	-	-	-	-	rpsJ_V57M	-	-	-
ECDC_SE18_001	2018	Sweden	Not stated	EuroGASP2018	PRJEB34068	ERR9837415	SAMEA5958093	No data	S	No data	I	0.19	S	<0,016	S	<0,002	S	0.002	S	No data	I	new	new	29	9363	126	39	67	238	148	153	133	63	2.001	9	1	100	100	100	100	-	-	-	-	-	rpsJ_V57M	-	-	-
ECDC_SE18_008	2018	Sweden	Not stated	EuroGASP2018	PRJEB34068	ERR9839053	SAMEA5958514	No data	S	No data	I	0.25	S	0.023	S	0.023	S	0.008	S	No data	I	649	442	29	1580	126	39	67	111	148	153	133	182	2.001	25	3	100	100	100	100	-	-	-	-	-	rpsJ_V57M	-	-	-
ECDC_SE18_009	2018	Sweden	Not stated	EuroGASP2018	PRJEB34068	ERR9838932	SAMEA5958518	No data	S	No data	I	0.25	S	<0,016	S	0.002	S	0.002	S	No data	I	new	6720	29	9362	126	39	67	238	147	153	133	3583	2.001	414	3	100	100	100	100	-	-	-	-	-	rpsJ_V57M	-	-	-
ECDC_SE18_011	2018	Sweden	Not stated	EuroGASP2018	PRJEB34068	ERR9839145	SAMEA5958536	No data	S	No data	I	0.125	S	<0,016	S	0.006	S	0.125	R	No data	R	225	4	4	1580	126	39	67	111	148	153	133	884	2.001	9	8	100	1	100	100	-	-	-	-	-	rpsJ_V57M	-	porB1b_G120K	porB1b_A121D
ECDC_SE18_014	2018	Sweden	Not stated	EuroGASP2018	PRJEB34068	ERR9837148	SAMEA5958549	No data	S	No data	I	0.125	S	0.016	S	0.008	S	0.19	R	No data	R	225	4	4	1580	126	39	67	111	148	153	133	884	2.001	9	8	100	1	100	100	-	-	-	-	-	rpsJ_V57M	-	porB1b_G120K	porB1b_A121D
ECDC_SE18_016	2018	Sweden	Not stated	EuroGASP2018	PRJEB34068	ERR9839208	SAMEA5958554	No data	S	No data	R	0.094	S	<0,016	S	0.004	S	1	R	No data	R	new	new	602	1587	59	39	67	78	148	153	133	719	2.002	89	100	100	7	4	100	-	-	-	blaTEM	tetM	rpsJ_V57M	-	-	-
ECDC_SE18_018	2018	Sweden	Not stated	EuroGASP2018	PRJEB34068	ERR9838802	SAMEA5958559	No data	S	No data	R	0.19	S	0.064	S	0.064	S	4	R	No data	R	new	new	4	7827	59	39	67	158	148	153	65	38	13.001	19	8	1	1	9	100	-	-	-	-	-	rpsJ_V57M	-	porB1b_G120K	porB1b_A121D
ECDC_SE18_022	2018	Sweden	Not stated	EuroGASP2018	PRJEB34068	ERR9839144	SAMEA5958638	No data	S	No data	R	0.25	S	0.047	S	0.047	S	6	R	No data	R	new	new	4	7827	59	39	67	158	148	153	65	38	13.001	19	8	1	1	9	100	-	-	-	-	-	rpsJ_V57M	-	porB1b_G120K	porB1b_A121D
ECDC_SE18_024	2018	Sweden	Not stated	EuroGASP2018	PRJEB34068	ERR9838005	SAMEA5785187	No data	S	No data	I	1.5	R	0.016	S	0.008	S	0.012	S	No data	I	new	new	29	9363	126	39	67	238	148	153	133	193	2.001	39	11	100	100	100	100	-	-	-	-	-	rpsJ_V57M	-	porB1b_G120K	-
ECDC_SE18_027	2018	Sweden	Not stated	EuroGASP2018	PRJEB34068	ERR9837707	SAMEA5959166	No data	S	No data	R	0.094	S	0.032	S	0.064	S	2	R	No data	R	new	new	4	7827	59	39	67	158	148	153	65	38	13.001	19	8	1	1	9	100	-	-	-	-	-	rpsJ_V57M	-	porB1b_G120K	porB1b_A121D
ECDC_SE18_030	2018	Sweden	Not stated	EuroGASP2018	PRJEB34068	ERR9837573	SAMEA5958428	No data	S	No data	I	0.19	S	<0,016	S	0.008	S	0.19	R	No data	R	225	4	4	1580	126	39	67	111	148	153	133	884	2.001	9	8	100	1	100	100	-	-	-	-	-	rpsJ_V57M	-	porB1b_G120K	porB1b_A121D
ECDC_SE18_037	2018	Sweden	Not stated	EuroGASP2018	PRJEB34068	ERR9837866	SAMEA5959113	No data	S	No data	I	0.38	S	<0,016	S	0.003	S	1.5	R	No data	I	new	90	new	13142	59	39	170	78	146	71	65	2601	19.001	40	13	100	7	4	100	-	-	-	-	-	rpsJ_V57M	-	-	-
ECDC_SE18_049	2018	Sweden	Not stated	EuroGASP2018	PRJEB34068	ERR9838851	SAMEA5958870	No data	S	No data	I	0.38	S	0.032	S	0.023	S	0.008	S	No data	I	649	442	29	1580	126	39	67	111	148	153	133	182	2.001	25	3	100	100	100	100	-	-	-	-	-	rpsJ_V57M	-	-	-
ECDC_SE18_051	2018	Sweden	Not stated	EuroGASP2018	PRJEB34068	ERR9838856	SAMEA5958872	No data	S	No data	I	0.5	S	0.016	S	0.006	S	0.004	S	No data	I	2992	1808	29	11864	126	39	785	238	148	153	133	439	2.001	9	1	100	100	1	100	-	-	-	-	-	rpsJ_V57M	-	-	-
ECDC_SE18_053	2018	Sweden	Not stated	EuroGASP2018	PRJEB34068	ERR9838860	SAMEA5958874	No data	S	No data	I	0.25	S	<0,016	S	0.004	S	2	R	No data	I	new	2019	953	8143	59	39	170	78	146	154	65	426	2.002	40	13	100	7	4	100	-	-	-	-	-	rpsJ_V57M	-	-	-
ECDC_SE18_055	2018	Sweden	Not stated	EuroGASP2018	PRJEB34068	ERR9838748	SAMEA5958876	No data	S	No data	I	0.094	S	<0,016	S	0.003	S	1.5	R	No data	R	new	90	9	13763	59	112	67	157	148	71	65	1586	14.001	10	13	1	7	7	100	-	-	-	blaTEM	-	rpsJ_V57M	-	-	-
ECDC_SE18_056	2018	Sweden	Not stated	EuroGASP2018	PRJEB34068	ERR9838750	SAMEA5958877	No data	S	No data	I	1	R	<0,016	S	0.006	S	24	R	No data	I	new	new	267	9363	126	39	67	238	148	153	133	168	2.001	39	11	100	7	4	100	-	-	-	-	-	rpsJ_V57M	-	porB1b_G120K	-
ECDC_SE18_059	2018	Sweden	Not stated	EuroGASP2018	PRJEB34068	ERR9838871	SAMEA5958880	No data	S	No data	R	0.094	S	<0,016	S	0.004	S	1	R	No data	R	new	2430	602	1587	59	39	67	78	148	153	133	719	2.002	89	100	100	7	4	100	-	-	-	blaTEM	tetM	rpsJ_V57M	-	-	-
ECDC_SE18_068	2018	Sweden	Not stated	EuroGASP2018	PRJEB34068	ERR9838757	SAMEA5958889	No data	S	No data	I	0.25	S	<0,016	S	0.004	S	1.5	R	No data	I	new	2019	953	8143	59	39	170	78	146	154	65	426	2.002	40	13	100	7	4	100	-	-	-	-	-	rpsJ_V57M	-	-	-
ECDC_SE18_073	2018	Sweden	Not stated	EuroGASP2018	PRJEB34068	ERR9838946	SAMEA5958954	No data	S	No data	R	0.023	S	<0,016	S	0.003	S	0.002	R	No data	R	new	new	new	11181	109	39	67	78	147	153	65	3677	19.001	64	55	100	100	4	100	-	-	-	blaTEM	tetM	rpsJ_V57M	-	-	-
ECDC_SE18_074	2018	Sweden	Not stated	EuroGASP2018	PRJEB34068	ERR9838661	SAMEA5958955	No data	S	No data	I	0.25	S	0.047	R	0.012	S	3	R	No data	I	new	5486	135	1580	126	39	67	111	148	153	133	1818	34.001	9	1	100	7	3	100	-	-	-	-	-	rpsJ_V57M	-	-	-
ECDC_SE18_075	2018	Sweden	Not stated	EuroGASP2018	PRJEB34068	ERR9839082	SAMEA5958958	No data	S	No data	I	1.5	R	<0,016	S	0.012	S	12	R	No data	I	12302	908	267	9363	126	39	67	238	148	153	133	168	2.001	39	11	100	7	4	100	-	-	-	-	-	rpsJ_V57M	-	porB1b_G120K	-
ECDC_SE18_077	2018	Sweden	Not stated	EuroGASP2018	PRJEB34068	ERR9839078	SAMEA5958957	No data	S	No data	I	0.38	S	<0,016	S	0.003	S	2	R	No data	I	new	2019	953	8143	59	39	170	78	146	154	65	426	2.002	40	13	100	7	4	100	-	-	-	-	-	rpsJ_V57M	-	-	-
ECDC_SE18_078	2018	Sweden	Not stated	EuroGASP2018	PRJEB34068	ERR9839086	SAMEA5958960	No data	S	No data	I	0.25	S	0.094	R	0.032	S	3	R	No data	I	new	5486	135	1580	126	39	67	111	148	153	133	1818	34.001	9	1	100	7	3	100	-	-	-	-	-	rpsJ_V57M	-	-	-
ECDC_SE18_082	2018	Sweden	Not stated	EuroGASP2018	PRJEB34068	ERR9839096	SAMEA5958962	No data	S	No data	R	0.047	S	0.023	S	0.016	S	3	R	No data	R	1458	90	60	new	59	39	67	990	148	71	65	3666	19.001	10	13	100	7	41	100	-	-	-	blaTEM	tetM	rpsJ_V57M	-	-	-
ECDC_SE18_087	2018	Sweden	Not stated	EuroGASP2018	PRJEB34068	ERR9839107	SAMEA5785160	No data	S	No data	R	0.032	S	<0,016	S	0.004	S	0.002	R	No data	R	new	new	new	11181	109	39	67	78	147	153	65	3677	19.001	64	55	100	100	4	100	-	-	-	blaTEM	tetM	rpsJ_V57M	-	-	-
ECDC_SE18_088	2018	Sweden	Not stated	EuroGASP2018	PRJEB34068	ERR9839128	SAMEA5958966	No data	S	No data	R	0.023	S	<0,016	S	0.004	S	3	R	No data	R	6696	997	60	1588	59	39	67	158	148	71	65	567	19.001	38	12	1	7	26	100	-	-	-	blaTEM	tetM	rpsJ_V57M	-	porB1b_G120K	-
ECDC_SE18_089	2018	Sweden	Not stated	EuroGASP2018	PRJEB34068	ERR9839111	SAMEA5785163	No data	S	No data	I	0.38	S	<0,016	S	0.004	S	2	R	No data	I	new	2019	953	8143	59	39	170	78	146	154	65	426	2.002	40	13	100	7	4	100	-	-	-	-	-	rpsJ_V57M	-	-	-
ECDC_SE18_093	2018	Sweden	Not stated	EuroGASP2018	PRJEB34068	ERR9838678	SAMEA5785167	No data	S	No data	I	0.25	S	0.047	S	0.016	S	0.003	S	No data	I	new	new	29	8126	126	39	67	78	148	153	133	240	2.001	25	1	100	100	100	100	-	-	-	-	-	rpsJ_V57M	-	-	-
ECDC_SE18_094	2018	Sweden	Not stated	EuroGASP2018	PRJEB34068	ERR9839150	SAMEA5958974	No data	S	No data	R	0.032	S	<0,016	S	0.003	S	0.003	R	No data	R	new	new	new	11181	109	39	67	78	147	153	65	3677	19.001	64	55	100	100	4	100	-	-	-	blaTEM	tetM	rpsJ_V57M	-	-	-
ECDC_SE18_097	2018	Sweden	Not stated	EuroGASP2018	PRJEB34068	ERR9838669	SAMEA5958972	No data	S	No data	I	0.38	S	<0,016	S	0.006	S	0.25	R	No data	R	225	4	4	1580	126	39	67	111	148	153	133	884	2.001	9	8	100	1	100	100	-	-	-	-	-	rpsJ_V57M	-	porB1b_G120K	porB1b_A121D
ECDC_SE18_098	2018	Sweden	Not stated	EuroGASP2018	PRJEB34068	ERR9839146	SAMEA5958973	No data	S	No data	R	0.064	S	<0,016	S	0.003	S	1	R	No data	R	13971	8060	33	1587	59	39	67	78	148	153	133	1139	2.002	89	1	100	7	4	100	-	-	-	blaTEM	tetM	rpsJ_V57M	-	-	-
ECDC_SE18_099	2018	Sweden	Not stated	EuroGASP2018	PRJEB34068	ERR9839162	SAMEA5958977	No data	S	No data	R	0.25	S	0.125	S	0.125	S	12	R	No data	R	new	new	4	7827	59	39	67	158	148	153	65	38	13.001	19	8	1	1	9	100	-	-	-	-	-	rpsJ_V57M	-	porB1b_G120K	porB1b_A121D
ECDC_SE18_101	2018	Sweden	Not stated	EuroGASP2018	PRJEB34068	ERR9839154	SAMEA5958975	No data	S	No data	I	0.25	S	<0,016	S	0.003	S	1	R	No data	I	new	2019	953	8143	59	39	170	78	146	154	65	426	2.002	40	13	100	7	4	100	-	-	-	-	-	rpsJ_V57M	-	-	-
ECDC_SE18_105	2018	Sweden	Not stated	EuroGASP2018	PRJEB34068	ERR9839166	SAMEA5958978	No data	S	No data	R	0.5	S	0.064	S	0.094	S	>32	R	No data	R	new	new	4	7827	59	39	67	158	148	153	65	38	13.001	19	8	1	1	9	100	-	-	-	-	-	rpsJ_V57M	-	porB1b_G120K	porB1b_A121D
ECDC_SE18_110	2018	Sweden	Not stated	EuroGASP2018	PRJEB34068	ERR9839179	SAMEA5958982	No data	S	No data	I	0.5	S	0.016	S	0.006	S	0.003	S	No data	I	2992	1808	29	11864	126	39	785	238	148	153	133	439	2.001	9	1	100	100	1	100	-	-	-	-	-	rpsJ_V57M	-	-	-
ECDC_SE18_111	2018	Sweden	Not stated	EuroGASP2018	PRJEB34068	ERR9838672	SAMEA5958985	No data	S	No data	I	0.38	S	<0,016	S	0.008	S	0.19	R	No data	R	225	4	4	1580	126	39	67	111	148	153	133	884	2.001	9	8	100	1	100	100	-	-	-	-	-	rpsJ_V57M	-	porB1b_G120K	porB1b_A121D
ECDC_SE18_112	2018	Sweden	Not stated	EuroGASP2018	PRJEB34068	ERR9839188	SAMEA5958986	No data	S	No data	I	0.19	S	<0,016	S	0.008	S	0.19	R	No data	R	225	4	4	1580	126	39	67	111	148	153	133	884	2.001	9	8	100	1	100	100	-	-	-	-	-	rpsJ_V57M	-	porB1b_G120K	porB1b_A121D
ECDC_SE18_113	2018	Sweden	Not stated	EuroGASP2018	PRJEB34068	ERR9839191	SAMEA5958987	No data	S	No data	I	1.5	R	<0,016	S	0.012	S	>32	R	No data	I	12302	908	267	9363	126	39	67	238	148	153	133	168	2.001	39	11	100	7	4	100	-	-	-	-	-	rpsJ_V57M	-	porB1b_G120K	-
ECDC_SE18_119	2018	Sweden	Not stated	EuroGASP2018	PRJEB34068	ERR9838677	SAMEA5958993	No data	S	No data	I	2	R	<0,016	S	0.012	S	>32	R	No data	I	12302	908	267	9363	126	39	67	238	148	153	133	168	2.001	39	11	100	7	4	100	-	-	-	-	-	rpsJ_V57M	-	porB1b_G120K	-
ECDC_SE18_121	2018	Sweden	Not stated	EuroGASP2018	PRJEB34068	ERR9838676	SAMEA5958992	No data	S	No data	R	0.25	S	0.047	S	0.064	S	8	R	No data	R	10569	6176	4	7827	59	39	67	158	148	153	65	38	13.001	19	8	1	1	9	100	-	-	-	-	-	rpsJ_V57M	-	porB1b_G120K	porB1b_A121D
ECDC_SE18_123	2018	Sweden	Not stated	EuroGASP2018	PRJEB34068	ERR9837891	SAMEA5958997	No data	S	No data	I	0.19	S	<0,016	S	0.006	S	0.19	R	No data	R	225	4	4	1580	126	39	67	111	148	153	133	884	2.001	9	8	100	1	100	100	-	-	-	-	-	rpsJ_V57M	-	porB1b_G120K	porB1b_A121D
ECDC_SE18_124	2018	Sweden	Not stated	EuroGASP2018	PRJEB34068	ERR9839211	SAMEA5785165	No data	S	No data	R	0.19	S	0.016	S	0.023	S	0.38	R	No data	R	14769	55	1971	1583	59	39	67	111	148	153	65	539	43.002	122	1	100	7	6	100	-	-	-	blaTEM	tetM	rpsJ_V57M	-	-	-
ECDC_SE18_126	2018	Sweden	Not stated	EuroGASP2018	PRJEB34068	ERR9838681	SAMEA5959000	No data	S	No data	I	0.25	S	<0,016	S	0.008	S	0.38	R	No data	R	225	4	4	1580	126	39	67	111	148	153	133	884	2.001	9	8	100	1	100	100	-	-	-	-	-	rpsJ_V57M	-	porB1b_G120K	porB1b_A121D
ECDC_SE18_127	2018	Sweden	Not stated	EuroGASP2018	PRJEB34068	ERR9838951	SAMEA5959005	No data	S	No data	I	3	R	<0,016	S	0.008	S	24	R	No data	I	12302	908	267	9363	126	39	67	238	148	153	133	168	2.001	39	11	100	7	4	100	-	-	-	-	-	rpsJ_V57M	-	porB1b_G120K	-
ECDC_SE18_131	2018	Sweden	Not stated	EuroGASP2018	PRJEB34068	ERR9837911	SAMEA5959008	No data	S	No data	R	0.094	S	<0,016	S	0.006	S	2	R	No data	R	new	90	1129	14795	59	39	67	156	149	530	133	1595	2.014	10	13	1	7	20	100	-	-	-	blaTEM	tetM	rpsJ_V57M	-	-	-
ECDC_SE18_134	2018	Sweden	Not stated	EuroGASP2018	PRJEB34068	ERR9837898	SAMEA5958999	No data	S	No data	I	0.5	S	<0,016	S	0.012	S	0.38	R	No data	R	1403	905	4	1580	126	39	67	111	148	153	133	884	2.001	9	8	100	1	100	100	-	-	-	-	-	rpsJ_V57M	-	porB1b_G120K	porB1b_A121D
ECDC_SE18_135	2018	Sweden	Not stated	EuroGASP2018	PRJEB34068	ERR9837935	SAMEA5959022	No data	S	No data	R	0.047	S	<0,016	S	0.003	S	1	R	No data	R	758	90	29	1587	59	39	67	78	148	153	133	714	2.002	89	13	100	7	4	100	-	-	-	blaTEM	tetM	rpsJ_V57M	-	-	-
ECDC_SE18_136	2018	Sweden	Not stated	EuroGASP2018	PRJEB34068	ERR9837668	SAMEA5959002	No data	S	No data	I	0.38	S	<0,016	S	0.006	S	0.25	R	No data	R	225	4	4	1580	126	39	67	111	148	153	133	884	2.001	9	8	100	1	100	100	-	-	-	-	-	rpsJ_V57M	-	porB1b_G120K	porB1b_A121D
ECDC_SE18_137	2018	Sweden	Not stated	EuroGASP2018	PRJEB34068	ERR9838684	SAMEA5959007	No data	S	No data	I	1	R	<0,016	S	0.004	S	0.002	S	No data	I	758	90	29	9363	126	39	67	238	148	153	133	2958	2.001	39	13	100	100	100	100	-	-	-	-	-	rpsJ_V57M	-	-	-
ECDC_SE18_138	2018	Sweden	Not stated	EuroGASP2018	PRJEB34068	ERR9837902	SAMEA5959003	No data	S	No data	I	1.5	R	<0,016	S	0.012	S	12	R	No data	I	12302	908	267	9363	126	39	67	238	148	153	133	168	2.001	39	11	100	7	4	100	-	-	-	-	-	rpsJ_V57M	-	porB1b_G120K	-
ECDC_SE18_140	2018	Sweden	Not stated	EuroGASP2018	PRJEB34068	ERR9837926	SAMEA5959017	No data	S	No data	R	0.19	S	<0,016	S	0.003	S	1.5	R	No data	R	new	952	1243	8143	59	39	170	78	146	154	65	new	2.002	216	100	100	7	4	new	-	-	-	blaTEM	tetM	rpsJ_V57M	-	-	-
ECDC_SE18_141	2018	Sweden	Not stated	EuroGASP2018	PRJEB34068	ERR9838688	SAMEA5959012	No data	S	No data	R	0.125	S	<0,016	S	0.006	S	0.25	R	No data	R	14769	55	1971	1583	59	39	67	111	148	153	65	3543	43.002	122	1	1	7	6	100	-	-	-	blaTEM	tetM	rpsJ_V57M	-	-	-
ECDC_SE18_142	2018	Sweden	Not stated	EuroGASP2018	PRJEB34068	ERR9837680	SAMEA5959021	No data	S	No data	I	1	R	0.016	S	0.012	S	6	R	No data	I	12302	908	267	9363	126	39	67	238	148	153	133	168	2.001	39	11	100	7	4	100	-	-	-	-	-	rpsJ_V57M	-	porB1b_G120K	-
ECDC_SE18_147	2018	Sweden	Not stated	EuroGASP2018	PRJEB34068	ERR9837918	SAMEA5959011	No data	S	No data	I	2	R	<0,016	S	0.008	S	8	R	No data	I	12302	908	267	9363	126	39	67	238	148	153	133	168	2.001	39	11	100	7	4	100	-	-	-	-	-	rpsJ_V57M	-	porB1b_G120K	-
ECDC_SE18_156	2018	Sweden	Not stated	EuroGASP2018	PRJEB34068	ERR9838954	SAMEA5959030	No data	S	No data	I	2	R	<0,016	S	0.008	S	16	R	No data	I	12302	908	267	9363	126	39	67	238	148	153	133	168	2.001	39	11	100	7	4	100	-	-	-	-	-	rpsJ_V57M	-	porB1b_G120K	-
ECDC_SE18_157	2018	Sweden	Not stated	EuroGASP2018	PRJEB34068	ERR9837941	SAMEA5959026	No data	S	No data	R	0.094	S	0.016	S	0.008	S	1	R	No data	R	new	new	191	11966	59	39	67	158	148	71	223	3593	2.002	47	3	1	7	17	100	-	-	-	blaTEM	tetM	rpsJ_V57M	-	-	-
ECDC_SE18_158	2018	Sweden	Not stated	EuroGASP2018	PRJEB34068	ERR9837685	SAMEA5959027	No data	S	No data	I	0.25	S	0.016	S	0.012	S	0.38	R	No data	R	225	4	4	1580	126	39	67	111	148	153	133	884	2.001	9	8	100	1	100	100	-	-	-	-	-	rpsJ_V57M	-	porB1b_G120K	porB1b_A121D
ECDC_SE18_163	2018	Sweden	Not stated	EuroGASP2018	PRJEB34068	ERR9837690	SAMEA5959035	No data	S	No data	I	0.25	S	<0,016	S	0.006	S	0.25	R	No data	R	225	4	4	1580	126	39	67	111	148	153	133	884	2.001	9	8	100	1	100	100	-	-	-	-	-	rpsJ_V57M	-	porB1b_G120K	porB1b_A121D
ECDC_SE18_166	2018	Sweden	Not stated	EuroGASP2018	PRJEB34068	ERR9838894	SAMEA5958892	No data	S	No data	I	0.25	S	<0,016	S	0.006	S	0.19	R	No data	R	225	4	4	1580	126	39	67	111	148	153	133	884	2.001	9	8	100	1	100	100	-	-	-	-	-	rpsJ_V57M	-	porB1b_G120K	porB1b_A121D
ECDC_SE18_170	2018	Sweden	Not stated	EuroGASP2018	PRJEB34068	ERR9838763	SAMEA5785159	No data	S	No data	I	0.25	S	<0,016	S	0.008	S	0.25	R	No data	R	225	4	4	1580	126	39	67	111	148	153	133	884	2.001	9	8	100	1	100	100	-	-	-	-	-	rpsJ_V57M	-	porB1b_G120K	porB1b_A121D
ECDC_SE18_171	2018	Sweden	Not stated	EuroGASP2018	PRJEB34068	ERR9838765	SAMEA5958893	No data	S	No data	R	0.19	S	0.016	S	0.008	S	0.38	R	No data	R	15589	7738	1971	1583	59	39	67	111	148	153	65	1340	43.002	122	100	100	7	6	100	-	-	-	blaTEM	tetM	rpsJ_V57M	-	-	-
ECDC_SE18_172	2018	Sweden	Not stated	EuroGASP2018	PRJEB34068	ERR9838767	SAMEA5958894	No data	S	No data	R	0.25	S	0.016	S	0.012	S	0.5	R	No data	R	15589	7738	1971	1583	59	39	67	111	148	153	65	1340	43.002	122	100	100	7	6	100	-	-	-	blaTEM	tetM	rpsJ_V57M	-	-	-
ECDC_SE18_173	2018	Sweden	Not stated	EuroGASP2018	PRJEB34068	ERR9838769	SAMEA5958895	No data	S	No data	I	0.064	S	<0,016	S	0.004	S	3	R	No data	I	12638	5860	21	new	59	142	170	78	147	71	65	1367	2.002	10	100	100	7	4	100	-	-	-	-	-	rpsJ_V57M	-	-	-
ECDC_SE18_174	2018	Sweden	Not stated	EuroGASP2018	PRJEB34068	ERR9838968	SAMEA5958896	No data	S	No data	I	0.125	S	<0,016	S	0.008	S	0.38	R	No data	R	225	4	4	1580	126	39	67	111	148	153	133	884	2.001	9	8	100	1	100	100	-	-	-	-	-	rpsJ_V57M	-	porB1b_G120K	porB1b_A121D
ECDC_SE18_179	2018	Sweden	Not stated	EuroGASP2018	PRJEB34068	ERR9838776	SAMEA5958901	No data	S	No data	R	0.064	S	<0,016	S	0.002	S	3	R	No data	R	new	new	1175	13482	59	39	67	158	146	154	65	3611	3.002	54	14	100	1	20	100	-	-	-	blaTEM	tetM	rpsJ_V57M	-	-	-
ECDC_SE18_181	2018	Sweden	Not stated	EuroGASP2018	PRJEB34068	ERR9838916	SAMEA5958903	No data	S	No data	R	0.19	S	0.023	S	0.012	S	0.5	R	No data	R	15589	7738	1971	1583	59	39	67	111	148	153	65	1340	43.002	122	100	100	7	6	100	-	-	-	blaTEM	tetM	rpsJ_V57M	-	-	-
ECDC_SE18_190	2018	Sweden	Not stated	EuroGASP2018	PRJEB34068	ERR9838995	SAMEA5958912	No data	S	No data	R	0.19	S	0.023	S	0.016	S	0.38	R	No data	R	new	new	1971	7823	435	39	170	111	148	153	65	1340	43.002	122	100	100	7	6	100	-	-	-	blaTEM	tetM	rpsJ_V57M	-	-	-
ECDC_SE18_194	2018	Sweden	Not stated	EuroGASP2018	PRJEB34068	ERR9839012	SAMEA5958916	No data	S	No data	R	0.047	S	<0,016	S	0.002	S	0.25	R	No data	R	new	5241	133	new	109	112	67	78	147	71	65	861	14.001	10	100	1	7	7	100	-	-	-	blaTEM	tetM	rpsJ_V57M	-	-	-
ECDC_SE18_198	2018	Sweden	Not stated	EuroGASP2018	PRJEB34068	ERR9839024	SAMEA5958920	No data	S	No data	R	0.125	S	<0,016	S	0.003	S	0.38	R	No data	I	5405	3279	1139	7823	435	39	170	111	148	153	65	273	2.002	1	100	1	7	2	100	-	-	-	-	tetM	-	-	-	-
ECDC_SE18_199	2018	Sweden	Not stated	EuroGASP2018	PRJEB34068	ERR9839028	SAMEA5958921	No data	S	No data	R	0.125	S	<0,016	S	0.003	S	0.38	R	No data	I	5405	3279	1139	7823	435	39	170	111	148	153	65	273	2.002	1	100	1	7	2	100	-	-	-	-	tetM	-	-	-	-
ECDC_SE18_200	2018	Sweden	Not stated	EuroGASP2018	PRJEB34068	ERR9839032	SAMEA5958922	No data	S	No data	R	0.25	S	0.064	S	0.094	S	>32	R	No data	R	new	new	4	7827	59	39	67	158	148	153	65	38	13.001	19	8	1	1	9	100	-	-	-	-	-	rpsJ_V57M	-	porB1b_G120K	porB1b_A121D
ECDC_SI13_020	2013	Slovenia	SI13_020	EuroGASP2013	PRJEB9227	ERR1528230	SAMEA3431948	No data	S	No data	I	No data	S	0.016	S	0.023	S	0.008	S	No data	I	10797	6326	263	9363	126	39	67	238	148	153	133	904	2.001	25	11	100	100	100	100	-	-	-	-	-	rpsJ_V57M	-	porB1b_G120K	-
ECDC_SI13_021	2013	Slovenia	SI13_021	EuroGASP2013	PRJEB9227	ERR1528229	SAMEA3431947	No data	S	No data	R	No data	S	0.016	S	0.004	S	No data	R	No data	I	10832	6349	953	8143	59	39	170	78	146	154	65	980	2.002	176	100	100	1	4	100	-	-	-	-	-	rpsJ_V57M	-	-	-
ECDC_SI13_024	2013	Slovenia	SI13_024	EuroGASP2013	PRJEB9227	ERR1528226	SAMEA3431944	No data	S	No data	R	No data	S	0.016	S	0.008	S	No data	R	No data	R	10833	134	743	1588	59	39	67	158	148	71	65	389	5.002	38	1	1	7	15	100	-	-	-	blaTEM	tetM	rpsJ_V57M	-	-	-
ECDC_SI13_030	2013	Slovenia	SI13_030	EuroGASP2013	PRJEB9227	ERR1514733	SAMEA3431754	No data	S	No data	R	No data	S	0.016	S	0.023	S	No data	R	No data	I	10799	6327	21	1582	59	39	170	78	148	154	65	new	2.002	19	8	100	1	18	new	-	-	-	-	-	rpsJ_V57M	-	porB1b_G120K	porB1b_A121D
ECDC_SI13_033	2013	Slovenia	SI13_033	EuroGASP2013	PRJEB9227	ERR1514736	SAMEA3431757	No data	S	No data	R	No data	S	0.016	S	0.023	S	No data	R	No data	I	10799	6327	21	1582	59	39	170	78	148	154	65	186	2.002	19	8	100	1	18	100	-	-	-	-	-	rpsJ_V57M	-	porB1b_G120K	porB1b_A121D
ECDC_SI13_035	2013	Slovenia	SI13_035	EuroGASP2013	PRJEB9227	ERR1514738	SAMEA3431759	No data	S	No data	R	No data	S	0.016	S	0.016	S	No data	R	No data	I	2997	866	21	1582	59	39	170	78	148	154	65	186	2.002	19	8	100	1	18	100	-	-	-	-	-	rpsJ_V57M	-	porB1b_G120K	porB1b_A121D
ECDC_SI13_037	2013	Slovenia	SI13_037	EuroGASP2013	PRJEB9227	ERR1514740	SAMEA3431761	No data	S	No data	R	No data	S	0.016	S	0.016	S	No data	R	No data	I	2997	866	21	1582	59	39	170	78	148	154	65	186	2.002	19	8	100	1	18	100	-	-	-	-	-	rpsJ_V57M	-	porB1b_G120K	porB1b_A121D
ECDC_SI13_038	2013	Slovenia	SI13_038	EuroGASP2013	PRJEB9227	ERR1514741	SAMEA3431762	No data	S	No data	I	No data	S	0.016	S	0.008	S	No data	S	No data	I	2992	1808	29	9363	126	39	67	238	148	153	133	63	2.001	9	1	100	100	100	100	-	-	-	-	-	rpsJ_V57M	-	-	-
ECDC_SI13_039	2013	Slovenia	SI13_039	EuroGASP2013	PRJEB9227	ERR1514742	SAMEA3431763	No data	S	No data	R	No data	S	0.016	S	0.023	S	No data	R	No data	I	225	4	4	1901	109	39	170	111	148	153	65	177	12.004	1	8	1	1	3	100	-	-	-	-	-	rpsJ_V57M	-	porB1b_G120K	porB1b_A121D
ECDC_SI13_041	2013	Slovenia	SI13_041	EuroGASP2013	PRJEB9227	ERR1514744	SAMEA3431765	No data	S	No data	R	No data	S	0.016	S	0.008	S	No data	R	No data	I	2997	866	21	1582	59	39	170	78	148	154	65	new	2.002	19	8	100	1	18	new	-	-	-	-	-	rpsJ_V57M	-	porB1b_G120K	porB1b_A121D
ECDC_SI13_060	2013	Slovenia	SI13_060	EuroGASP2013	PRJEB9227	ERR1528139	SAMEA3431671	No data	S	No data	I	No data	S	0.016	S	0.008	S	No data	S	No data	R	8370	1808	22	11428	126	39	170	238	734	153	133	new	9.001	25	1	100	100	100	new	-	-	-	blaTEM	-	rpsJ_V57M	-	-	-
ECDC_SI13_077	2013	Slovenia	SI13_077	EuroGASP2013	PRJEB9227	ERR1514679	SAMEA3431690	No data	S	No data	R	No data	S	0.016	S	0.023	S	No data	R	No data	I	10799	6327	21	1582	59	39	170	78	148	154	65	new	2.002	19	8	100	1	18	new	-	-	-	-	-	rpsJ_V57M	-	porB1b_G120K	porB1b_A121D
ECDC_SI13_079	2013	Slovenia	SI13_079	EuroGASP2013	PRJEB9227	ERR1514680	SAMEA3431691	No data	S	No data	R	No data	S	0.016	S	0.012	S	No data	R	No data	I	10799	6327	21	1582	59	39	170	78	148	154	65	186	2.002	19	8	100	1	18	100	-	-	-	-	-	rpsJ_V57M	-	porB1b_G120K	porB1b_A121D
ECDC_SI18_10132	2018	Slovenia	Not stated	EuroGASP2018	PRJEB34068	ERR9838186	SAMEA6106078	No data	S	No data	I	2	R	<=0,016	S	0.008	S	16	R	No data	I	3935	908	29	11422	109	39	67	238	148	153	133	2884	2.001	39	11	100	1	3	100	-	-	-	-	-	rpsJ_V57M	-	porB1b_G120K	-
ECDC_SI18_10203	2018	Slovenia	Not stated	EuroGASP2018	PRJEB34068	ERR9838189	SAMEA6106079	No data	S	No data	R	0.125	S	<=0,016	S	0.008	S	0.25	R	No data	R	15589	7738	1971	1583	59	39	67	111	148	153	65	1340	43.002	122	100	100	7	6	100	-	-	-	blaTEM	tetM	rpsJ_V57M	-	-	-
ECDC_SI18_10209	2018	Slovenia	Not stated	EuroGASP2018	PRJEB34068	ERR9838307	SAMEA6106080	No data	S	No data	R	0.125	S	<=0,016	S	0.008	S	0.25	R	No data	R	15589	7738	1971	1583	59	39	67	111	148	153	65	1340	43.002	122	100	100	7	6	100	-	-	-	blaTEM	tetM	rpsJ_V57M	-	-	-
ECDC_SI18_11345	2018	Slovenia	Not stated	EuroGASP2018	PRJEB34068	ERR9838091	SAMEA6105580	No data	S	No data	I	2	R	<=0,016	S	0.004	S	4	R	No data	I	new	new	267	9363	126	39	67	238	148	153	133	168	2.001	39	11	100	7	4	100	-	-	-	-	-	rpsJ_V57M	-	porB1b_G120K	-
ECDC_SI18_11498	2018	Slovenia	Not stated	EuroGASP2018	PRJEB34068	ERR9838142	SAMEA6106051	No data	S	No data	I	0.064	S	0.032	S	0.016	S	4	R	No data	R	new	new	33	8780	59	39	67	158	149	71	65	3692	43.002	54	100	1	7	20	100	-	-	-	blaTEM	-	rpsJ_V57M	-	-	-
ECDC_SI18_11560	2018	Slovenia	Not stated	EuroGASP2018	PRJEB34068	ERR9838095	SAMEA6105577	No data	S	No data	I	2	R	<=0,016	S	0.008	S	4	R	No data	I	12302	908	267	9363	126	39	67	238	148	153	133	168	2.001	39	11	100	7	4	100	-	-	-	-	-	rpsJ_V57M	-	porB1b_G120K	-
ECDC_SI18_12103	2018	Slovenia	Not stated	EuroGASP2018	PRJEB34068	ERR9838115	SAMEA6106033	No data	S	No data	R	0.125	S	<=0,016	S	0.008	S	0.5	R	No data	R	15589	7738	1971	1583	59	39	67	111	148	153	65	1340	43.002	122	100	100	7	6	100	-	-	-	blaTEM	tetM	rpsJ_V57M	-	-	-
ECDC_SI18_12203	2018	Slovenia	Not stated	EuroGASP2018	PRJEB34068	ERR9838153	SAMEA6106056	No data	S	No data	R	0.125	S	<=0,016	S	0.008	S	0.5	R	No data	R	new	new	1971	1583	59	39	67	111	148	153	65	539	43.002	122	1	100	7	6	100	-	-	-	blaTEM	tetM	rpsJ_V57M	-	-	-
ECDC_SI18_12218	2018	Slovenia	Not stated	EuroGASP2018	PRJEB34068	ERR9839271	SAMEA6106659	No data	S	No data	I	<=0,016	S	0.032	S	0.016	S	2	R	No data	R	new	new	33	8780	59	39	67	158	149	71	65	3692	43.002	54	100	1	7	20	100	-	-	-	blaTEM	-	rpsJ_V57M	-	-	-
ECDC_SI18_12664	2018	Slovenia	Not stated	EuroGASP2018	PRJEB34068	ERR9838107	SAMEA6106716	No data	S	No data	R	0.125	S	<=0,016	S	0.008	S	0.5	R	No data	R	new	new	1971	1583	59	39	67	111	148	153	65	539	43.002	122	1	100	7	6	100	-	-	-	blaTEM	tetM	rpsJ_V57M	-	-	-
ECDC_SI18_12969	2018	Slovenia	Not stated	EuroGASP2018	PRJEB34068	ERR9838349	SAMEA6106718	No data	S	No data	I	0.064	S	<=0,016	S	0.016	S	4	R	No data	R	new	new	33	8780	59	39	67	158	149	71	65	3692	43.002	54	100	1	7	20	100	-	-	-	blaTEM	-	rpsJ_V57M	-	-	-
ECDC_SI18_14375	2018	Slovenia	Not stated	EuroGASP2018	PRJEB34068	ERR9838291	SAMEA6106058	No data	S	No data	I	0.064	S	0.032	S	0.016	S	4	R	No data	R	new	new	33	8780	59	39	67	158	149	71	65	3692	43.002	54	100	1	7	20	100	-	-	-	blaTEM	-	rpsJ_V57M	-	-	-
ECDC_SI18_14389	2018	Slovenia	Not stated	EuroGASP2018	PRJEB34068	ERR9838080	SAMEA6105569	No data	S	No data	R	0.064	S	<=0,016	S	0.008	S	0.25	R	No data	I	15589	7738	1971	1583	59	39	67	111	148	153	65	1340	43.002	122	100	100	7	6	100	-	-	-	-	tetM	rpsJ_V57M	-	-	-
ECDC_SI18_14486	2018	Slovenia	Not stated	EuroGASP2018	PRJEB34068	ERR9839442	SAMEA6106629	No data	S	No data	R	0.064	S	<=0,016	S	0.008	S	0.25	R	No data	R	new	new	1971	1583	59	39	67	111	148	153	65	539	43.002	122	1	100	7	6	100	-	-	-	blaTEM	tetM	rpsJ_V57M	-	-	-
ECDC_SI18_14740	2018	Slovenia	Not stated	EuroGASP2018	PRJEB34068	ERR9839446	SAMEA6106630	No data	S	No data	R	0.064	S	<=0,016	S	0.008	S	0.5	R	No data	R	new	new	1971	1583	59	39	67	111	148	153	65	539	43.002	122	1	100	7	6	100	-	-	-	blaTEM	tetM	rpsJ_V57M	-	-	-
ECDC_SI18_15310	2018	Slovenia	Not stated	EuroGASP2018	PRJEB34068	ERR9839452	SAMEA6106635	No data	S	No data	I	0.125	S	<=0,016	S	0.004	S	<=0,002	S	No data	I	11083	535	29	11999	126	39	67	111	148	783	133	245	2.001	9	3	1	100	100	100	-	-	-	-	-	rpsJ_V57M	-	-	-
ECDC_SI18_16128	2018	Slovenia	Not stated	EuroGASP2018	PRJEB34068	ERR9839459	SAMEA6106640	No data	S	No data	R	0.125	S	0.032	S	0.008	S	1	R	No data	R	new	new	1971	1583	59	39	67	111	148	153	65	539	43.002	122	1	100	7	6	100	-	-	-	blaTEM	tetM	rpsJ_V57M	-	-	-
ECDC_SI18_16442	2018	Slovenia	Not stated	EuroGASP2018	PRJEB34068	ERR9839467	SAMEA6106604	No data	S	No data	R	0.125	S	<=0,016	S	0.008	S	0.5	R	No data	R	15589	7738	1971	1583	59	39	67	111	148	153	65	1340	43.002	122	100	100	7	6	100	-	-	-	blaTEM	tetM	rpsJ_V57M	-	-	-
ECDC_SI18_16600	2018	Slovenia	Not stated	EuroGASP2018	PRJEB34068	ERR9839471	SAMEA6106606	No data	S	No data	R	0.125	S	<=0,016	S	0.008	S	0.5	R	No data	I	15589	7738	1971	1583	59	39	67	111	148	153	65	1340	43.002	122	100	100	7	6	100	-	-	-	-	tetM	rpsJ_V57M	-	-	-
ECDC_SI18_17034	2018	Slovenia	Not stated	EuroGASP2018	PRJEB34068	ERR9839476	SAMEA6106608	No data	S	No data	R	0.125	S	<=0,016	S	0.008	S	0.5	R	No data	R	new	new	1971	1583	59	39	67	111	148	153	65	1340	43.002	122	100	100	7	6	100	-	-	-	blaTEM	tetM	rpsJ_V57M	-	-	-
ECDC_SI18_17038	2018	Slovenia	Not stated	EuroGASP2018	PRJEB34068	ERR9839477	SAMEA6106607	No data	S	No data	R	0.125	S	<=0,016	S	0.008	S	0.5	R	No data	R	15589	7738	1971	1583	59	39	67	111	148	153	65	1340	43.002	122	100	100	7	6	100	-	-	-	blaTEM	tetM	rpsJ_V57M	-	-	-
ECDC_SI18_17754	2018	Slovenia	Not stated	EuroGASP2018	PRJEB34068	ERR9839491	SAMEA6106613	No data	S	No data	I	0.5	S	<=0,016	S	<=0,002	S	<=0,002	S	No data	I	5441	30	18	8156	59	39	67	111	150	153	65	442	2.001	1	1	1	100	2	100	-	-	-	-	-	-	rplD_G70D	-	-
ECDC_SI18_18045	2018	Slovenia	Not stated	EuroGASP2018	PRJEB34068	ERR9839494	SAMEA6106614	No data	S	No data	R	0.064	S	<=0,016	S	0.008	S	0.5	R	No data	R	15589	7738	1971	1583	59	39	67	111	148	153	65	1340	43.002	122	100	100	7	6	100	-	-	-	blaTEM	tetM	rpsJ_V57M	-	-	-
ECDC_SI18_18099	2018	Slovenia	Not stated	EuroGASP2018	PRJEB34068	ERR9839495	SAMEA6106615	No data	S	No data	R	0.125	S	<=0,016	S	0.008	S	0.5	R	No data	R	15589	7738	1971	1583	59	39	67	111	148	153	65	1340	43.002	122	100	100	7	6	100	-	-	-	blaTEM	tetM	rpsJ_V57M	-	-	-
ECDC_SI18_19018	2018	Slovenia	Not stated	EuroGASP2018	PRJEB34068	ERR9839503	SAMEA6106618	No data	S	No data	I	0.25	S	<=0,016	S	0.004	S	1	R	No data	I	new	new	137	13732	59	39	170	78	146	153	65	3671	19.001	40	13	100	7	9	100	-	-	-	-	-	rpsJ_V57M	-	-	-
ECDC_SI18_19395	2018	Slovenia	Not stated	EuroGASP2018	PRJEB34068	ERR9839513	SAMEA6106622	No data	S	No data	I	0.25	S	<=0,016	S	<=0,002	S	<=0,002	S	No data	I	9208	1808	18	13292	126	39	785	156	148	153	133	439	2.001	9	1	100	100	1	100	-	-	-	-	-	rpsJ_V57M	-	-	-
ECDC_SI18_3632	2018	Slovenia	Not stated	EuroGASP2018	PRJEB34068	ERR9837723	SAMEA6106034	No data	S	No data	R	0.125	S	<=0,016	S	0.016	S	0.5	R	No data	R	15589	7738	1971	1583	59	39	67	111	148	153	65	1340	43.002	122	100	100	7	6	100	-	-	-	blaTEM	tetM	rpsJ_V57M	-	-	-
ECDC_SI18_3639	2018	Slovenia	Not stated	EuroGASP2018	PRJEB34068	ERR9838120	SAMEA6106037	No data	S	No data	I	1	R	<=0,016	S	0.004	S	4	R	No data	I	new	7738	29	11422	109	39	67	238	148	153	133	new	2.001	39	100	100	1	3	new	-	-	-	-	-	rpsJ_V57M	-	-	-
ECDC_SI18_4191	2018	Slovenia	Not stated	EuroGASP2018	PRJEB34068	ERR9838125	SAMEA6106040	No data	S	No data	R	0.125	S	<=0,016	S	0.016	S	0.5	R	No data	R	15589	7738	1971	1583	59	39	67	111	148	153	65	1340	43.002	122	100	100	7	6	100	-	-	-	blaTEM	tetM	rpsJ_V57M	-	-	-
ECDC_SI18_4753	2018	Slovenia	Not stated	EuroGASP2018	PRJEB34068	ERR9838133	SAMEA6106042	No data	S	No data	R	0.064	S	<=0,016	S	0.008	S	0.5	R	No data	R	15589	7738	1971	1583	59	39	67	111	148	153	65	1340	43.002	122	100	100	7	6	100	-	-	-	blaTEM	tetM	rpsJ_V57M	-	-	-
ECDC_SI18_5425	2018	Slovenia	Not stated	EuroGASP2018	PRJEB34068	ERR9838281	SAMEA6106046	No data	S	No data	I	2	R	<=0,016	S	0.008	S	32	R	No data	I	3935	908	29	11422	109	39	67	238	148	153	133	new	2.001	39	11	100	1	3	new	-	-	-	-	-	rpsJ_V57M	-	porB1b_G120K	-
ECDC_SI18_5439	2018	Slovenia	Not stated	EuroGASP2018	PRJEB34068	ERR9838137	SAMEA6106048	No data	S	No data	R	0.064	S	<=0,016	S	0.008	S	0.5	R	No data	R	15589	7738	1971	1583	59	39	67	111	148	153	65	1340	43.002	122	100	100	7	6	100	-	-	-	blaTEM	tetM	rpsJ_V57M	-	-	-
ECDC_SI18_5646	2018	Slovenia	Not stated	EuroGASP2018	PRJEB34068	ERR9838284	SAMEA6106049	No data	S	No data	R	0.125	S	<=0,016	S	0.008	S	0.5	R	No data	R	15589	7738	1971	1583	59	39	67	111	148	153	65	1340	43.002	122	100	100	7	6	100	-	-	-	blaTEM	tetM	rpsJ_V57M	-	-	-
ECDC_SI18_5734	2018	Slovenia	Not stated	EuroGASP2018	PRJEB34068	ERR9838532	SAMEA6106057	No data	S	No data	R	0.125	S	<=0,016	S	0.016	S	0.5	R	No data	R	15589	7738	1971	1583	59	39	67	111	148	153	65	1340	43.002	122	100	100	7	6	100	-	-	-	blaTEM	tetM	rpsJ_V57M	-	-	-
ECDC_SI18_5813	2018	Slovenia	Not stated	EuroGASP2018	PRJEB34068	ERR9838534	SAMEA6106050	No data	S	No data	R	0.064	S	<=0,016	S	0.016	S	0.5	R	No data	R	15589	7738	1971	1583	59	39	67	111	148	153	65	1340	43.002	122	100	100	7	6	100	-	-	-	blaTEM	tetM	rpsJ_V57M	-	-	-
ECDC_SI18_6418	2018	Slovenia	Not stated	EuroGASP2018	PRJEB34068	ERR9838288	SAMEA6106052	No data	S	No data	R	0.064	S	<=0,016	S	0.016	S	0.5	R	No data	R	15589	7738	1971	1583	59	39	67	111	148	153	65	1340	43.002	122	100	100	7	6	100	-	-	-	blaTEM	tetM	rpsJ_V57M	-	-	-
ECDC_SI18_7360	2018	Slovenia	Not stated	EuroGASP2018	PRJEB34068	ERR9838540	SAMEA6106063	No data	S	No data	R	0.125	S	<=0,016	S	0.008	S	1	R	No data	R	15589	7738	1971	1583	59	39	67	111	148	153	65	1340	43.002	122	100	100	7	6	100	-	-	-	blaTEM	tetM	rpsJ_V57M	-	-	-
ECDC_SI18_7680	2018	Slovenia	Not stated	EuroGASP2018	PRJEB34068	ERR9838365	SAMEA6106062	No data	S	No data	R	0.125	S	<=0,016	S	0.008	S	0.25	R	No data	R	15589	7738	1971	1583	59	39	67	111	148	153	65	1340	43.002	122	100	100	7	6	100	-	-	-	blaTEM	tetM	rpsJ_V57M	-	-	-
ECDC_SI18_7682	2018	Slovenia	Not stated	EuroGASP2018	PRJEB34068	ERR9838296	SAMEA6106061	No data	S	No data	R	0.125	S	<=0,016	S	0.008	S	0.25	R	No data	R	15589	7738	1971	1583	59	39	67	111	148	153	65	1340	43.002	122	100	100	7	6	100	-	-	-	blaTEM	tetM	rpsJ_V57M	-	-	-
ECDC_SI18_7881	2018	Slovenia	Not stated	EuroGASP2018	PRJEB34068	ERR9838160	SAMEA6106065	No data	S	No data	R	0.125	S	<=0,016	S	0.016	S	0.5	R	No data	R	15589	7738	1971	1583	59	39	67	111	148	153	65	1340	43.002	122	100	100	7	6	100	-	-	-	blaTEM	tetM	rpsJ_V57M	-	-	-
ECDC_SI18_7898	2018	Slovenia	Not stated	EuroGASP2018	PRJEB34068	ERR9838300	SAMEA6106067	No data	S	No data	R	0.125	S	<=0,016	S	0.008	S	0.5	R	No data	R	15589	7738	1971	1583	59	39	67	111	148	153	65	1340	43.002	122	100	100	7	6	100	-	-	-	blaTEM	tetM	rpsJ_V57M	-	-	-
ECDC_SI18_8866	2018	Slovenia	Not stated	EuroGASP2018	PRJEB34068	ERR9838168	SAMEA6106070	No data	S	No data	R	0.125	S	0.032	S	0.008	S	1	R	No data	R	15589	7738	1971	1583	59	39	67	111	148	153	65	1340	43.002	122	100	100	7	6	100	-	-	-	blaTEM	tetM	rpsJ_V57M	-	-	-
ECDC_SI18_8939	2018	Slovenia	Not stated	EuroGASP2018	PRJEB34068	ERR9838175	SAMEA6106072	No data	S	No data	R	0.064	S	<=0,016	S	0.008	S	0.5	R	No data	R	new	new	1971	1583	59	39	67	111	148	153	65	1340	43.002	122	100	100	7	6	100	-	-	-	blaTEM	tetM	rpsJ_V57M	-	-	-
ECDC_SI18_9191	2018	Slovenia	Not stated	EuroGASP2018	PRJEB34068	ERR9838178	SAMEA6106073	No data	S	No data	R	0.25	S	0.064	S	0.064	S	8	R	No data	R	2318	1053	4	7827	59	39	67	158	148	153	65	38	13.001	19	8	1	1	9	100	-	-	-	-	-	rpsJ_V57M	-	porB1b_G120K	porB1b_A121D
ECDC_SI18_9617	2018	Slovenia	Not stated	EuroGASP2018	PRJEB34068	ERR9838545	SAMEA6106076	No data	S	No data	I	0.5	S	<=0,016	S	0.004	S	<=0,002	S	No data	I	new	new	29	9363	126	39	67	238	148	153	133	63	2.001	9	1	100	100	100	100	-	-	-	-	-	rpsJ_V57M	-	-	-
ECDC_SK13_058	2013	Slovakia	SK13_058	EuroGASP2013	PRJEB9227	ERR1469672	SAMEA3390270	No data	S	No data	I	No data	S	0.016	S	0.008	S	<0,002	S	No data	I	359	301	29	8126	126	39	67	78	148	153	133	987	66.001	25	3	100	100	100	18	-	-	-	-	-	rpsJ_V57M	-	-	-
ECDC_SK13_059	2013	Slovakia	SK13_059	EuroGASP2013	PRJEB9227	ERR1469673	SAMEA3390279	No data	S	No data	I	No data	S	0.047	S	0.016	S	No data	S	No data	I	359	301	29	8126	126	39	67	78	148	153	133	new	66.001	25	3	100	100	100	new	-	-	-	-	-	rpsJ_V57M	-	-	-
ECDC_SK13_060	2013	Slovakia	SK13_060	EuroGASP2013	PRJEB9227	ERR1469674	SAMEA3390280	No data	S	No data	I	No data	S	0.023	S	0.016	S	No data	S	No data	I	359	301	29	8126	126	39	67	78	148	153	133	new	66.001	25	3	100	100	100	new	-	-	-	-	-	rpsJ_V57M	-	-	-
ECDC_SK13_061	2013	Slovakia	SK13_061	EuroGASP2013	PRJEB9227	ERR1469675	SAMEA3390281	No data	S	No data	I	No data	S	0.016	S	0.008	S	No data	S	No data	I	2992	1808	29	11428	126	39	170	238	734	153	133	new	2.001	9	1	100	100	100	new	-	-	-	-	-	rpsJ_V57M	-	-	-
ECDC_SK13_064	2013	Slovakia	SK13_064	EuroGASP2013	PRJEB9227	ERR1469677	SAMEA3390284	No data	S	No data	I	No data	S	0.016	S	0.006	S	No data	S	No data	I	2992	1808	29	11428	126	39	170	238	734	153	133	new	2.001	9	1	100	100	100	new	-	-	-	-	-	rpsJ_V57M	-	-	-
ECDC_SK13_066	2013	Slovakia	SK13_066	EuroGASP2013	PRJEB9227	ERR1469678	SAMEA3390286	No data	S	No data	I	No data	S	0.032	S	0.016	S	No data	S	No data	I	359	301	29	8126	126	39	67	78	148	153	133	new	66.001	25	3	100	100	100	new	-	-	-	-	-	rpsJ_V57M	-	-	-
ECDC_SK13_087	2013	Slovakia	SK13_087	EuroGASP2013	PRJEB9227	ERR1469697	SAMEA3390305	No data	S	No data	I	No data	S	0.023	S	0.016	S	No data	S	No data	I	11044	6459	29	8126	126	39	67	78	148	153	133	new	66.001	25	3	100	100	100	new	-	-	-	-	-	rpsJ_V57M	-	-	-
ECDC_SK13_104	2013	Slovakia	SK13_104	EuroGASP2013	PRJEB9227	ERR1514722	SAMEA3431740	No data	S	No data	I	No data	S	0.016	S	0.006	S	No data	S	No data	I	2992	1808	29	11428	126	39	170	238	734	153	133	new	2.001	9	1	100	100	100	new	-	-	-	-	-	rpsJ_V57M	-	-	-
ECDC_SK13_108	2013	Slovakia	SK13_108	EuroGASP2013	PRJEB9227	ERR1514727	SAMEA3431747	No data	S	No data	I	No data	S	0.016	S	0.006	S	No data	S	No data	I	2992	1808	29	11428	126	39	170	238	734	153	133	new	2.001	9	1	100	100	100	new	-	-	-	-	-	rpsJ_V57M	-	-	-
ECDC_SK13_110	2013	Slovakia	SK13_110	EuroGASP2013	PRJEB9227	ERR1680311	SAMEA3431745	No data	S	No data	R	0.5	S	0.016	S	0.012	S	No data	R	No data	I	10039	5912	4	1901	109	39	170	111	148	153	65	new	12.004	1	1	1	1	3	new	-	-	-	-	-	rpsJ_V57M	-	-	-
ECDC_SK18_002	2018	Slovakia	Not stated	EuroGASP2018	PRJEB34068	ERR9838274	SAMEA6106179	No data	S	No data	I	0.5	S	<0,016	S	<0,016	S	4	R	No data	R	9918	5860	953	13526	59	39	170	78	146	154	133	436	2.002	40	100	100	7	3	100	-	-	-	blaTEM	-	rpsJ_V57M	-	-	-
ECDC_SK18_014	2018	Slovakia	Not stated	EuroGASP2018	PRJEB34068	ERR9838290	SAMEA6106193	No data	S	No data	I	0.047	S	<0,016	S	<0,016	S	3	R	No data	I	9918	5860	953	8143	59	39	170	78	146	154	65	436	2.002	40	100	100	7	3	100	-	-	-	-	-	rpsJ_V57M	-	-	-
ECDC_SK18_019	2018	Slovakia	Not stated	EuroGASP2018	PRJEB34068	ERR9838225	SAMEA6106196	No data	S	No data	I	0.047	S	<0,016	S	<0,016	S	1.5	R	No data	I	9918	5860	953	8143	59	39	170	78	146	154	65	436	2.002	40	100	100	7	3	100	-	-	-	-	-	rpsJ_V57M	-	-	-
ECDC_SK18_020	2018	Slovakia	Not stated	EuroGASP2018	PRJEB34068	ERR9838299	SAMEA6106198	No data	S	No data	I	0.38	S	<0,016	S	<0,016	S	2	R	No data	R	5624	90	953	8143	59	39	170	78	146	154	65	426	2.002	40	13	100	7	4	100	-	-	-	blaTEM	-	rpsJ_V57M	-	-	-
ECDC_SK18_023	2018	Slovakia	Not stated	EuroGASP2018	PRJEB34068	ERR9838547	SAMEA6106201	No data	S	No data	R	0.25	S	<0,016	S	<0,016	S	1	R	No data	I	8845	1808	4	7827	59	39	67	158	148	153	65	2998	2.002	19	1	1	1	9	100	-	-	-	-	-	rpsJ_V57M	-	-	-
ECDC_SK18_027	2018	Slovakia	Not stated	EuroGASP2018	PRJEB34068	ERR9838316	SAMEA6106204	No data	S	No data	S	0.125	S	<0,016	S	<0,016	S	<0,002	S	No data	S	new	new	2264	11255	59	39	67	156	149	153	65	3654	15.001	18	100	100	100	1	100	-	-	-	-	-	-	-	-	-
ECDC_SK18_032	2018	Slovakia	Not stated	EuroGASP2018	PRJEB34068	ERR9838327	SAMEA6106209	No data	S	No data	R	0.25	S	0.023	S	0.047	S	6	R	No data	R	2318	1053	4	7827	59	39	67	158	148	153	65	1011	13.001	19	8	1	7	9	100	-	-	-	-	-	rpsJ_V57M	-	porB1b_G120K	porB1b_A121D
ECDC_SK18_033	2018	Slovakia	Not stated	EuroGASP2018	PRJEB34068	ERR9838562	SAMEA6106210	No data	S	No data	R	0.25	S	0.032	S	0.047	S	8	R	No data	R	2318	1053	4	7827	59	39	67	158	148	153	65	1011	13.001	19	8	1	7	9	100	-	-	-	-	-	rpsJ_V57M	-	porB1b_G120K	porB1b_A121D
ECDC_SK18_047	2018	Slovakia	Not stated	EuroGASP2018	PRJEB34068	ERR9838605	SAMEA6106223	No data	S	No data	I	0.5	S	<0,016	S	<0,016	S	0.002	S	No data	I	9208	1808	18	13292	126	39	785	156	148	153	133	439	2.001	9	1	100	100	1	100	-	-	-	-	-	rpsJ_V57M	-	-	-
ECDC_SK18_055	2018	Slovakia	Not stated	EuroGASP2018	PRJEB34068	ERR9838628	SAMEA6106232	No data	S	No data	S	0.19	S	<0,016	S	<0,016	S	<0,002	S	No data	S	new	new	2264	11255	59	39	67	156	149	153	65	3654	15.001	18	100	100	100	1	100	-	-	-	-	-	-	-	-	-
ECDC_SK18_057	2018	Slovakia	Not stated	EuroGASP2018	PRJEB34068	ERR9838634	SAMEA6106234	No data	S	No data	R	1.5	S	<0,016	S	<0,016	S	0.003	S	No data	I	4244	1808	893	11428	126	39	170	238	734	153	133	246	2.001	1	1	100	100	100	100	-	-	-	-	-	rpsJ_V57M	-	-	-
ECDC_SK18_059	2018	Slovakia	Not stated	EuroGASP2018	PRJEB34068	ERR9838639	SAMEA6106236	No data	S	No data	I	0.047	S	<0,016	S	<0,016	S	2	R	No data	I	9918	5860	953	8143	59	39	170	78	146	154	65	436	2.002	40	100	100	7	3	100	-	-	-	-	-	rpsJ_V57M	-	-	-
ECDC_SK18_064	2018	Slovakia	Not stated	EuroGASP2018	PRJEB34068	ERR9838522	SAMEA6105852	No data	S	No data	R	0.38	S	0.047	S	0.064	S	8	R	No data	R	new	new	4	7827	59	39	67	158	148	153	65	38	13.001	19	8	1	1	9	100	-	-	-	-	-	rpsJ_V57M	-	porB1b_G120K	porB1b_A121D
ECDC_SK18_065	2018	Slovakia	Not stated	EuroGASP2018	PRJEB34068	ERR9837910	SAMEA6105854	No data	S	No data	I	3	R	<0,016	S	<0,016	S	24	R	No data	I	12302	908	267	9363	126	39	67	238	148	153	133	168	2.001	39	11	100	7	4	100	-	-	-	-	-	rpsJ_V57M	-	porB1b_G120K	-
ECDC_SK18_069	2018	Slovakia	Not stated	EuroGASP2018	PRJEB34068	ERR9837921	SAMEA6105858	No data	S	No data	I	0.5	S	<0,016	S	<0,016	S	0.002	S	No data	I	9208	1808	18	13292	126	39	785	156	148	153	133	439	2.001	9	1	100	100	1	100	-	-	-	-	-	rpsJ_V57M	-	-	-
ECDC_SK18_076	2018	Slovakia	Not stated	EuroGASP2018	PRJEB34068	ERR9837928	SAMEA6105864	No data	S	No data	R	0.19	S	<0,016	S	<0,016	S	3	R	No data	R	new	new	new	7363	59	39	67	78	148	153	65	3600	2.002	89	54	100	7	26	100	-	-	-	blaTEM	tetM	rpsJ_V57M	-	-	-
ECDC_T2_ES003	2013	Spain	T2_ES003	EuroGASP2013	PRJEB9227	ERR1560885	SAMEA3485674	No data	S	No data	I	0.25	S	0.06	S	0.015	S	0.007	S	No data	I	995	28	29	1580	126	39	67	111	148	153	133	new	2.001	9	3	100	100	100	new	-	-	-	-	-	rpsJ_V57M	rplD_G70D	-	-
ECDC_T2_ES004	2013	Spain	T2_ES004	EuroGASP2013	PRJEB9227	ERR1560886	SAMEA3485675	No data	S	No data	R	0.25	S	0.03	S	0.03	S	16	R	No data	R	661	443	10	1582	59	39	170	78	148	154	65	186	2.002	19	8	100	1	18	100	-	-	-	blaTEM	-	rpsJ_V57M	-	porB1b_G120K	porB1b_A121D
ECDC_T2_ES005	2013	Spain	T2_ES005	EuroGASP2013	PRJEB9227	ERR1560887	SAMEA3485676	No data	S	No data	R	0.06	S	0.015	S	0.003	S	2	R	No data	I	5405	3279	1139	7823	435	39	170	111	148	153	65	894	2.002	18	100	1	7	2	100	-	-	-	-	tetM	-	-	-	-
ECDC_T2_ES006	2013	Spain	T2_ES006	EuroGASP2013	PRJEB9227	ERR1560888	SAMEA3485677	No data	S	No data	R	0.06	S	0.03	S	0.007	S	16	R	No data	R	5526	3336	137	1588	59	39	67	158	148	71	65	971	19.002	38	12	1	7	55	100	-	-	-	blaTEM	tetM	rpsJ_V57M	-	porB1b_G120K	-
ECDC_T2_ES007	2013	Spain	T2_ES007	EuroGASP2013	PRJEB9227	ERR1560889	SAMEA3485678	No data	S	No data	I	2	R	0.015	S	0.003	S	0.007	S	No data	I	2992	1808	29	9363	126	39	67	238	148	153	133	64	2.001	9	1	100	100	100	2	-	-	23S_rDNA_c2597t	-	-	rpsJ_V57M	-	-	-
ECDC_T2_ES014	2013	Spain	T2_ES014	EuroGASP2013	PRJEB9227	ERR1560896	SAMEA3485685	No data	S	No data	I	0.25	S	0.03	S	0.007	S	0.007	S	No data	I	5230	3163	29	11463	126	39	67	238	734	153	133	new	2.001	9	11	100	100	100	new	-	-	-	-	-	rpsJ_V57M	-	porB1b_G120K	-
ECDC_T2_ES018	2013	Spain	T2_ES018	EuroGASP2013	PRJEB9227	ERR1560900	SAMEA3485689	No data	S	No data	I	0.25	S	0.12	S	0.003	S	0.003	S	No data	I	2992	1808	29	11463	126	39	67	238	734	153	133	new	2.001	9	1	100	100	100	new	-	-	-	-	-	rpsJ_V57M	-	-	-
ECDC_T2_ES022	2013	Spain	T2_ES022	EuroGASP2013	PRJEB9227	ERR1560904	SAMEA3485693	No data	S	No data	I	0.25	S	0.12	S	0.015	S	8	R	No data	R	225	4	4	1580	126	39	67	111	148	153	133	884	2.001	9	8	100	1	100	100	-	-	-	-	-	rpsJ_V57M	-	porB1b_G120K	porB1b_A121D
ECDC_T2_ES023	2013	Spain	T2_ES023	EuroGASP2013	PRJEB9227	ERR1560905	SAMEA3485694	No data	S	No data	I	0.25	S	0.06	S	0.03	S	0.007	S	No data	I	9190	5465	29	1580	126	39	67	111	148	153	133	301	2.001	9	3	100	100	100	100	-	-	-	-	-	rpsJ_V57M	rplD_G70D	-	-
ECDC_T2_ES024	2013	Spain	T2_ES024	EuroGASP2013	PRJEB9227	ERR1560906	SAMEA3485695	No data	S	No data	I	0.25	S	0.12	S	0.03	S	0.007	S	No data	I	9190	5465	29	1580	126	39	67	111	148	153	133	301	2.001	9	3	100	100	100	100	-	-	-	-	-	rpsJ_V57M	rplD_G70D	-	-
ECDC_T2_ES032	2013	Spain	T2_ES032	EuroGASP2013	PRJEB9227	ERR1560914	SAMEA3485703	No data	S	No data	R	0.25	S	0.03	S	0.015	S	4	R	No data	R	5624	90	953	8143	59	39	170	78	146	154	65	new	2.002	1	13	100	7	4	new	-	-	-	blaTEM	-	rpsJ_V57M	-	-	-
ECDC_T2_ES033	2013	Spain	T2_ES033	EuroGASP2013	PRJEB9227	ERR1560915	SAMEA3485704	No data	S	No data	R	0.25	S	0.03	S	0.015	S	4	R	No data	R	13302	4837	10	1582	59	39	170	78	148	154	65	new	2.002	19	100	100	1	18	new	-	-	-	blaTEM	-	rpsJ_V57M	-	-	-
ECDC_T2_ES035	2013	Spain	T2_ES035	EuroGASP2013	PRJEB9227	ERR1560916	SAMEA3485706	No data	S	No data	R	0.25	S	0.06	S	0.015	S	4	R	No data	R	13302	4837	10	1582	59	39	170	78	148	154	65	896	2.002	19	100	100	1	18	100	-	-	-	blaTEM	-	rpsJ_V57M	-	-	-
ECDC_T2_ES041	2013	Spain	T2_ES041	EuroGASP2013	PRJEB9227	ERR1560922	SAMEA3485712	No data	S	No data	I	0.25	S	0.06	S	0.015	S	0.007	S	No data	I	6335	3736	29	9363	126	39	67	238	148	153	133	new	2.001	9	1	100	100	100	new	-	-	-	-	-	rpsJ_V57M	-	-	-
ECDC_T2_ES045	2013	Spain	T2_ES045	EuroGASP2013	PRJEB9227	ERR1560926	SAMEA3485716	No data	S	No data	R	0.25	S	0.06	S	0.06	S	32	R	No data	I	8820	5210	4	1901	109	39	170	111	148	153	65	177	12.004	1	8	1	1	3	100	-	-	-	-	-	rpsJ_V57M	-	porB1b_G120K	porB1b_A121D
ECDC_T2_ES047	2013	Spain	T2_ES047	EuroGASP2013	PRJEB9227	ERR1560928	SAMEA3485718	No data	S	No data	R	0.25	S	0.12	S	0.06	S	32	R	No data	R	new	new	29	7823	435	39	170	111	148	153	65	748	43.002	1	11	1	7	24	100	-	-	-	blaTEM	tetM	rpsJ_V57M	-	porB1b_G120K	-
ECDC_T2_ES049	2013	Spain	T2_ES049	EuroGASP2013	PRJEB9227	ERR1560930	SAMEA3485720	No data	S	No data	I	0.5	S	0.03	S	0.007	S	0.007	S	No data	I	2992	1808	29	9363	126	39	67	238	148	153	133	new	2.001	9	1	100	100	100	new	-	-	-	-	-	rpsJ_V57M	-	-	-
ECDC_T2_ES052	2013	Spain	T2_ES052	EuroGASP2013	PRJEB9227	ERR1560933	SAMEA3485723	No data	S	No data	R	0.12	S	0.06	S	0.03	S	8	R	No data	R	9165	65	345	1588	59	39	67	158	148	71	65	433	19.001	47	3	1	7	17	100	-	-	-	blaTEM	tetM	rpsJ_V57M	-	-	-
ECDC_T2_ES057	2013	Spain	T2_ES057	EuroGASP2013	PRJEB9227	ERR1560938	SAMEA3485728	No data	S	No data	R	0.12	S	0.12	S	0.06	S	32	R	No data	R	8093	4824	29	7823	435	39	170	111	148	153	65	748	43.002	1	11	1	7	24	100	-	-	-	blaTEM	tetM	rpsJ_V57M	-	porB1b_G120K	-
ECDC_T2_ES058	2013	Spain	T2_ES058	EuroGASP2013	PRJEB9227	ERR1560939	SAMEA3485729	No data	S	No data	R	0.12	S	0.03	S	0.015	S	0.094	R	No data	I	317	244	21	1583	59	39	67	111	148	153	65	976	2.001	177	8	1	14	2	100	-	-	-	-	-	rpsJ_V57M	-	porB1b_G120K	porB1b_A121D
ECDC_UK18_18BI167	2018	United Kingdom	Not stated	EuroGASP2018	PRJEB34068	ERR9839272	SAMEA6106537	No data	S	No data	I	0.125	S	0.015	S	0.008	S	>0,06	R	No data	R	9918	5860	953	8143	59	39	170	78	146	154	65	436	2.002	40	100	100	7	3	100	-	-	-	blaTEM	-	rpsJ_V57M	-	-	-
ECDC_UK18_18BI169	2018	United Kingdom	Not stated	EuroGASP2018	PRJEB34068	ERR9839276	SAMEA6106538	No data	S	No data	I	2	R	0.06	S	0.015	S	>0,06	R	No data	I	12302	908	267	9363	126	39	67	238	148	153	133	168	2.001	39	11	100	7	4	100	-	-	-	-	-	rpsJ_V57M	-	porB1b_G120K	-
ECDC_UK18_18BI180	2018	United Kingdom	Not stated	EuroGASP2018	PRJEB34068	ERR9838401	SAMEA6106546	No data	S	No data	R	0.125	S	0.125	S	0.03	S	>0,06	R	No data	R	new	new	4	7827	59	39	67	158	148	153	65	38	13.001	19	8	1	1	9	100	-	-	-	-	-	rpsJ_V57M	-	porB1b_G120K	porB1b_A121D
ECDC_UK18_18BI182	2018	United Kingdom	Not stated	EuroGASP2018	PRJEB34068	ERR9839292	SAMEA6106549	No data	S	No data	I	1	R	0.06	S	0.015	S	>0,06	R	No data	I	new	new	29	11422	109	39	67	238	148	153	133	2884	2.001	39	11	100	1	3	100	-	-	-	-	-	rpsJ_V57M	-	porB1b_G120K	-
ECDC_UK18_18BI183	2018	United Kingdom	Not stated	EuroGASP2018	PRJEB34068	ERR9838404	SAMEA6106550	No data	S	No data	I	0.25	S	0.015	S	<=0,004	S	>0,06	R	No data	I	9918	5860	953	8143	59	39	170	78	146	154	65	3672	19.001	40	100	100	7	4	100	-	-	-	-	-	rpsJ_V57M	-	-	-
ECDC_UK18_18BI184	2018	United Kingdom	Not stated	EuroGASP2018	PRJEB34068	ERR9839297	SAMEA6106551	No data	S	No data	I	2	R	0.03	S	0.015	S	<=0,06	S	No data	I	3935	908	29	11422	109	39	67	238	148	153	133	193	2.001	39	11	100	100	100	100	-	-	-	-	-	rpsJ_V57M	-	porB1b_G120K	-
ECDC_UK18_18BI185	2018	United Kingdom	Not stated	EuroGASP2018	PRJEB34068	ERR9839298	SAMEA6106552	No data	S	No data	I	2	R	0.03	S	0.015	S	<=0,06	S	No data	I	3935	908	29	11422	109	39	67	238	148	153	133	193	2.001	39	11	100	100	100	100	-	-	-	-	-	rpsJ_V57M	-	porB1b_G120K	-
ECDC_UK18_18BR078	2018	United Kingdom	Not stated	EuroGASP2018	PRJEB34068	ERR9838579	SAMEA6105785	No data	S	No data	I	0.5	S	0.015	S	0.008	S	>0,06	R	No data	R	340	90	4	8143	59	39	170	78	146	154	65	426	2.002	40	13	100	7	4	100	-	-	-	blaTEM	-	rpsJ_V57M	-	-	-
ECDC_UK18_18BS031	2018	United Kingdom	Not stated	EuroGASP2018	PRJEB34068	ERR9838471	SAMEA6105987	No data	S	No data	R	0.125	S	0.03	S	0.008	S	>0,06	R	No data	R	new	new	953	1587	59	39	67	78	148	153	133	1204	2.002	89	12	100	7	4	100	-	-	-	blaTEM	tetM	rpsJ_V57M	-	porB1b_G120K	-
ECDC_UK18_18BS034	2018	United Kingdom	Not stated	EuroGASP2018	PRJEB34068	ERR9838474	SAMEA6105989	No data	S	No data	I	0.5	S	0.03	S	0.008	S	<=0,06	S	No data	I	9208	1808	18	13292	126	39	785	156	148	153	133	439	2.001	9	1	100	100	1	100	-	-	-	-	-	rpsJ_V57M	-	-	-
ECDC_UK18_18CC256	2018	United Kingdom	Not stated	EuroGASP2018	PRJEB34068	ERR9837832	SAMEA6105596	No data	S	No data	R	0.094	S	<0,016	S	0.003	S	1.5	R	No data	R	12818	7457	602	1587	59	39	67	78	148	153	133	719	2.002	89	100	100	7	4	100	-	-	-	blaTEM	tetM	rpsJ_V57M	-	-	-
ECDC_UK18_18CC258	2018	United Kingdom	Not stated	EuroGASP2018	PRJEB34068	ERR9837833	SAMEA6105597	No data	S	No data	R	0.125	S	0.03	S	0.008	S	>0,06	R	No data	I	new	6720	27	7827	59	39	67	158	148	153	65	3644	14.001	19	3	1	1	9	100	-	-	-	-	-	rpsJ_V57M	-	-	-
ECDC_UK18_18CC265	2018	United Kingdom	Not stated	EuroGASP2018	PRJEB34068	ERR9838420	SAMEA6105601	No data	S	No data	I	0.5	S	0.03	S	0.008	S	<=0,06	S	No data	I	9208	1808	18	13292	126	39	785	156	148	153	133	439	2.001	9	1	100	100	1	100	-	-	-	-	-	rpsJ_V57M	-	-	-
ECDC_UK18_18CC830	2018	United Kingdom	Not stated	EuroGASP2018	PRJEB34068	ERR9838194	SAMEA6106082	No data	S	No data	R	0.125	S	0.03	S	0.015	S	>0,06	R	No data	I	new	new	136	7822	126	39	170	111	148	153	65	430	2.002	19	100	1	7	3	100	-	-	-	-	tetM	rpsJ_V57M	-	-	-
ECDC_UK18_18CC836	2018	United Kingdom	Not stated	EuroGASP2018	PRJEB34068	ERR9838319	SAMEA6106106	No data	S	No data	R	0.25	S	0.06	S	0.03	S	>0,06	R	No data	R	15589	7738	1971	1583	59	39	67	111	148	153	65	1340	43.002	122	100	100	7	6	100	-	-	-	blaTEM	tetM	rpsJ_V57M	-	-	-
ECDC_UK18_18CC838	2018	United Kingdom	Not stated	EuroGASP2018	PRJEB34068	ERR9838554	SAMEA6106107	No data	S	No data	R	0.125	S	0.03	S	0.015	S	>0,06	R	No data	R	new	596	1649	15634	59	39	170	78	148	1109	65	3681	19.014	89	100	100	7	8	100	-	-	-	blaTEM	tetM	rpsJ_V57M	-	-	-
ECDC_UK18_18CC839	2018	United Kingdom	Not stated	EuroGASP2018	PRJEB34068	ERR9838557	SAMEA6106108	No data	S	No data	R	0.25	S	0.125	S	0.06	S	>0,06	R	No data	R	10386	246	4	7827	59	39	67	158	148	153	65	38	13.001	19	8	1	1	9	100	-	-	-	-	-	rpsJ_V57M	-	porB1b_G120K	porB1b_A121D
ECDC_UK18_18CC845	2018	United Kingdom	Not stated	EuroGASP2018	PRJEB34068	ERR9838202	SAMEA6106115	No data	S	No data	R	0.25	S	0.06	S	0.015	S	>0,06	R	No data	R	15589	7738	1971	1583	59	39	67	111	148	153	65	1340	43.002	122	100	100	7	6	100	-	-	-	blaTEM	tetM	rpsJ_V57M	-	-	-
ECDC_UK18_18CC849	2018	United Kingdom	Not stated	EuroGASP2018	PRJEB34068	ERR9838329	SAMEA6106117	No data	S	No data	I	2	R	0.03	S	0.015	S	>0,06	R	No data	I	12302	908	267	9363	126	39	67	238	148	153	133	168	2.001	39	11	100	7	4	100	-	-	-	-	-	rpsJ_V57M	-	porB1b_G120K	-
ECDC_UK18_18CC853	2018	United Kingdom	Not stated	EuroGASP2018	PRJEB34068	ERR9838382	SAMEA6106121	No data	S	No data	I	1	R	0.03	S	0.015	S	>0,06	R	No data	I	12302	908	267	9363	126	39	67	238	148	153	133	168	2.001	39	11	100	7	4	100	-	-	-	-	-	rpsJ_V57M	-	porB1b_G120K	-
ECDC_UK18_18CC855	2018	United Kingdom	Not stated	EuroGASP2018	PRJEB34068	ERR9838577	SAMEA6106123	No data	S	No data	R	<=0,06	S	0.03	S	0.015	S	>0,06	R	No data	R	338	90	121	1588	59	39	67	158	148	71	65	1873	19.001	261	13	1	7	3	100	-	-	-	blaTEM	-	rpsJ_V57M	-	-	-
ECDC_UK18_18CC857	2018	United Kingdom	Not stated	EuroGASP2018	PRJEB34068	ERR9838582	SAMEA6106124	No data	S	No data	R	0.25	S	0.06	S	0.03	S	>0,06	R	No data	I	14700	3031	4	13489	59	39	67	158	148	153	918	1225	13.001	19	3	1	1	9	100	-	-	-	-	-	rpsJ_V57M	-	-	-
ECDC_UK18_18CC863	2018	United Kingdom	Not stated	EuroGASP2018	PRJEB34068	ERR9838603	SAMEA6106091	No data	S	No data	R	0.094	S	<0,016	S	0.003	S	1.5	R	No data	R	12818	7457	602	1587	59	39	67	78	148	153	133	719	2.002	89	100	100	7	4	100	-	-	-	blaTEM	tetM	rpsJ_V57M	-	-	-
ECDC_UK18_18CC864	2018	United Kingdom	Not stated	EuroGASP2018	PRJEB34068	ERR9838606	SAMEA6106090	No data	S	No data	R	0.125	S	0.125	S	0.06	S	>0,06	R	No data	R	10386	246	4	7827	59	39	67	158	148	153	65	38	13.001	19	8	1	1	9	100	-	-	-	-	-	rpsJ_V57M	-	porB1b_G120K	porB1b_A121D
ECDC_UK18_18CC872	2018	United Kingdom	Not stated	EuroGASP2018	PRJEB34068	ERR9838624	SAMEA6106098	No data	S	No data	I	0.25	S	0.015	S	<=0,004	S	<=0,06	S	No data	I	9208	1808	18	13292	126	39	785	156	148	153	133	439	2.001	9	1	100	100	1	100	-	-	-	-	-	rpsJ_V57M	-	-	-
ECDC_UK18_18CC875	2018	United Kingdom	Not stated	EuroGASP2018	PRJEB34068	ERR9838631	SAMEA6106100	No data	S	No data	R	0.125	S	0.06	S	0.03	S	>0,06	R	No data	R	15589	7738	1971	1583	59	39	67	111	148	153	65	1340	43.002	122	100	100	7	6	100	-	-	-	blaTEM	tetM	rpsJ_V57M	-	-	-
ECDC_UK18_18CC877	2018	United Kingdom	Not stated	EuroGASP2018	PRJEB34068	ERR9838636	SAMEA6106102	No data	S	No data	I	0.25	S	0.015	S	0.008	S	<=0,06	S	No data	I	9208	1808	18	13292	126	39	785	156	148	153	133	439	2.001	9	1	100	100	1	100	-	-	-	-	-	rpsJ_V57M	-	-	-
ECDC_UK18_18CC880	2018	United Kingdom	Not stated	EuroGASP2018	PRJEB34068	ERR9838640	SAMEA6106103	No data	S	No data	I	0.125	S	0.125	R	0.015	S	>0,06	R	No data	I	new	new	602	8143	59	39	170	78	146	154	65	170	34.006	40	3	100	7	4	100	-	-	-	-	-	rpsJ_V57M	-	-	-
ECDC_UK18_18CC883	2018	United Kingdom	Not stated	EuroGASP2018	PRJEB34068	ERR9839284	SAMEA6106665	No data	S	No data	I	64	R	0.03	S	0.015	S	>0,06	R	No data	I	new	4993	267	9363	126	39	67	238	148	153	133	1039	2.001	39	11	100	7	4	2	-	-	23S_rDNA_c2597t	-	-	rpsJ_V57M	-	porB1b_G120K	-
ECDC_UK18_18CC889	2018	United Kingdom	Not stated	EuroGASP2018	PRJEB34068	ERR9838207	SAMEA6106127	No data	S	No data	I	<=0,06	S	0.008	S	<=0,004	S	<=0,06	S	No data	R	new	new	21	11982	126	39	67	238	148	153	65	883	2.001	9	8	100	100	100	100	-	-	-	-	-	rpsJ_V57M	-	porB1b_G120K	porB1b_A121D
ECDC_UK18_18CC897	2018	United Kingdom	Not stated	EuroGASP2018	PRJEB34068	ERR9838652	SAMEA6106129	No data	S	No data	I	2	R	0.06	S	0.03	S	<=0,06	S	No data	I	5035	1914	29	9363	126	39	67	238	148	153	133	193	2.001	39	11	100	100	100	100	-	-	-	-	-	rpsJ_V57M	-	porB1b_G120K	-
ECDC_UK18_18CC911	2018	United Kingdom	Not stated	EuroGASP2018	PRJEB34068	ERR9838431	SAMEA6106135	No data	S	No data	R	0.25	S	0.125	S	0.06	S	>0,06	R	No data	R	10386	246	4	7827	59	39	67	158	148	153	65	38	13.001	19	8	1	1	9	100	-	-	-	-	-	rpsJ_V57M	-	porB1b_G120K	porB1b_A121D
ECDC_UK18_18CC912	2018	United Kingdom	Not stated	EuroGASP2018	PRJEB34068	ERR9838432	SAMEA6106132	No data	S	No data	R	0.125	S	0.06	S	0.03	S	>0,06	R	No data	R	15589	7738	1971	1583	59	39	67	111	148	153	65	1340	43.002	122	100	100	7	6	100	-	-	-	blaTEM	tetM	rpsJ_V57M	-	-	-
ECDC_UK18_18CC915	2018	United Kingdom	Not stated	EuroGASP2018	PRJEB34068	ERR9837835	SAMEA6105605	No data	S	No data	I	48	R	0.03	S	0.015	S	>0,06	R	No data	I	new	4993	267	9363	126	39	67	238	148	153	133	1039	2.001	39	11	100	7	4	2	-	-	23S_rDNA_c2597t	-	-	rpsJ_V57M	-	porB1b_G120K	-
ECDC_UK18_18CC916	2018	United Kingdom	Not stated	EuroGASP2018	PRJEB34068	ERR9838251	SAMEA6106136	No data	S	No data	I	0.25	S	0.015	S	0.008	S	<=0,06	S	No data	R	9208	1808	18	new	126	39	785	156	147	153	133	439	2.001	9	1	100	100	1	100	-	-	-	blaTEM	-	rpsJ_V57M	-	-	-
ECDC_UK18_18CC960	2018	United Kingdom	Not stated	EuroGASP2018	PRJEB34068	ERR9838441	SAMEA6106142	No data	S	No data	I	2	R	0.015	S	0.015	S	>0,06	R	No data	I	14502	2078	267	9363	126	39	67	238	148	153	133	168	2.001	39	11	100	7	4	100	-	-	-	-	-	rpsJ_V57M	-	porB1b_G120K	-
ECDC_UK18_18CC962	2018	United Kingdom	Not stated	EuroGASP2018	PRJEB34068	ERR9838444	SAMEA6106141	No data	S	No data	I	2	R	0.125	S	0.015	S	<=0,06	S	No data	I	new	6720	29	14399	109	39	170	238	148	153	133	3606	2.047	39	3	100	100	100	100	-	-	-	-	-	rpsJ_V57M	-	-	-
ECDC_UK18_18CC996	2018	United Kingdom	Not stated	EuroGASP2018	PRJEB34068	ERR9839401	SAMEA6106713	No data	S	No data	I	<=0,06	S	0.03	S	0.008	S	<=0,06	S	No data	I	9208	1808	18	13292	126	39	785	156	148	153	133	439	2.001	9	1	100	100	1	100	-	-	-	-	-	rpsJ_V57M	-	-	-
ECDC_UK18_18CM016	2018	United Kingdom	Not stated	EuroGASP2018	PRJEB34068	ERR9838501	SAMEA6106172	No data	S	No data	S	0.125	S	0.06	S	0.015	S	<=0,06	S	No data	I	13892	8032	29	1580	126	39	67	111	148	153	133	2655	93.001	25	3	100	100	100	100	-	-	-	-	-	-	-	-	-
ECDC_UK18_18GL015	2018	United Kingdom	Not stated	EuroGASP2018	PRJEB34068	ERR9838262	SAMEA6106171	No data	S	No data	I	0.25	S	0.03	S	0.008	S	<=0,06	S	No data	I	new	3104	18	13292	126	39	785	156	148	153	133	439	2.001	9	1	100	100	1	100	-	-	-	-	-	rpsJ_V57M	-	-	-
ECDC_UK18_18HO058	2018	United Kingdom	Not stated	EuroGASP2018	PRJEB34068	ERR9839290	SAMEA6106667	No data	S	No data	I	<=0,06	S	0.015	S	0.008	S	<=0,06	S	No data	I	2	2	16	11975	59	39	762	111	188	71	223	84	22.001	15	100	100	100	7	100	-	-	-	-	-	rpsJ_V57M	-	-	-
ECDC_UK18_18HO069	2018	United Kingdom	Not stated	EuroGASP2018	PRJEB34068	ERR9839274	SAMEA6106658	No data	S	No data	I	0.125	S	0.015	S	0.03	S	<=0,06	S	No data	I	995	28	29	1580	126	39	67	111	148	153	133	245	2.001	9	3	1	100	100	100	-	-	-	-	-	rpsJ_V57M	-	-	-
ECDC_UK18_18KI030	2018	United Kingdom	Not stated	EuroGASP2018	PRJEB34068	ERR9838261	SAMEA6106008	No data	S	No data	I	<=0,06	S	0.03	S	0.008	S	<=0,06	S	No data	I	1572	1022	6	11075	109	39	67	111	228	71	65	1	22.001	10	13	100	100	2	100	-	-	-	-	-	rpsJ_V57M	-	-	-
ECDC_UK18_18LE100	2018	United Kingdom	Not stated	EuroGASP2018	PRJEB34068	ERR9838083	SAMEA6105995	No data	S	No data	I	<=0,06	S	0.015	S	0.008	S	<=0,06	S	No data	I	2	2	16	8163	59	39	170	111	188	71	223	new	22.001	15	100	100	100	7	new	-	-	-	-	-	rpsJ_V57M	-	-	-
ECDC_UK18_18LE103	2018	United Kingdom	Not stated	EuroGASP2018	PRJEB34068	ERR9838085	SAMEA6105999	No data	S	No data	I	0.125	R	0.023	S	0.008	S	0.004	S	No data	I	13892	8032	29	1580	126	39	67	111	148	153	133	3711	93.001	419	3	100	100	100	100	-	-	-	-	-	-	-	-	-
ECDC_UK18_18LE105	2018	United Kingdom	Not stated	EuroGASP2018	PRJEB34068	ERR9838493	SAMEA6106000	No data	S	No data	I	0.5	S	0.03	S	0.008	S	<=0,06	S	No data	I	9208	1808	18	13292	126	39	785	156	148	153	133	439	2.001	9	1	100	100	1	100	-	-	-	-	-	rpsJ_V57M	-	-	-
ECDC_UK18_18LE106	2018	United Kingdom	Not stated	EuroGASP2018	PRJEB34068	ERR9838087	SAMEA6106001	No data	S	No data	I	0.25	S	0.06	S	0.015	S	<=0,06	S	No data	I	new	4873	29	11999	126	39	67	111	148	783	133	245	2.001	9	3	1	100	100	100	-	-	-	-	-	rpsJ_V57M	-	-	-
ECDC_UK18_18LE110	2018	United Kingdom	Not stated	EuroGASP2018	PRJEB34068	ERR9838253	SAMEA6106004	No data	S	No data	I	0.25	S	0.015	S	0.008	S	<=0,06	S	No data	I	9208	1808	18	13292	126	39	785	156	148	153	133	439	2.001	9	1	100	100	1	100	-	-	-	-	-	rpsJ_V57M	-	-	-
ECDC_UK18_18LI068	2018	United Kingdom	Not stated	EuroGASP2018	PRJEB34068	ERR9837887	SAMEA6105780	No data	S	No data	I	<=0,06	S	0.015	S	0.008	S	<=0,06	S	No data	I	new	2	new	8163	59	39	170	111	188	71	223	84	22.001	15	100	100	100	7	100	-	-	-	-	-	rpsJ_V57M	-	-	-
ECDC_UK18_18LI074	2018	United Kingdom	Not stated	EuroGASP2018	PRJEB34068	ERR9838469	SAMEA6106154	No data	S	No data	I	0.25	S	0.03	S	0.015	S	<=0,06	S	No data	I	9654	1808	1744	11428	126	39	170	238	734	153	133	63	2.001	9	1	100	100	100	100	-	-	-	-	-	rpsJ_V57M	-	-	-
ECDC_UK18_18MA194	2018	United Kingdom	Not stated	EuroGASP2018	PRJEB34068	ERR9838335	SAMEA6105567	No data	S	No data	I	<=0,06	S	0.015	S	0.008	S	<=0,06	S	No data	I	72	58	16	11975	59	39	762	111	188	71	223	84	22.001	15	100	100	100	7	100	-	-	-	-	-	rpsJ_V57M	-	-	-
ECDC_UK18_18NE017	2018	United Kingdom	Not stated	EuroGASP2018	PRJEB34068	ERR9838409	SAMEA6105588	No data	S	No data	R	0.25	S	0.03	S	0.008	S	<=0,06	R	No data	R	14769	55	1971	1583	59	39	67	111	148	153	65	3543	43.002	122	1	1	7	6	100	-	-	-	blaTEM	tetM	rpsJ_V57M	-	-	-
ECDC_UK18_18NH018	2018	United Kingdom	Not stated	EuroGASP2018	PRJEB34068	ERR9838075	SAMEA6105566	No data	S	No data	I	<=0,06	S	0.015	S	<=0,004	S	<=0,06	S	No data	I	new	new	16	11975	59	39	762	111	188	71	223	84	22.001	15	100	100	100	7	100	-	-	-	-	-	rpsJ_V57M	-	-	-
ECDC_UK18_18NO043	2018	United Kingdom	Not stated	EuroGASP2018	PRJEB34068	ERR9839295	SAMEA6106668	No data	S	No data	R	0.125	S	0.06	S	0.03	S	>0,06	R	No data	R	15589	7738	1971	1583	59	39	67	111	148	153	65	1340	43.002	122	100	100	7	6	100	-	-	-	blaTEM	tetM	rpsJ_V57M	-	-	-
ECDC_UK18_18NO044	2018	United Kingdom	Not stated	EuroGASP2018	PRJEB34068	ERR9839296	SAMEA6106670	No data	S	No data	I	0.125	R	0.064	S	0.008	S	0.003	S	No data	I	13892	8032	29	1580	126	39	67	111	148	153	133	3711	93.001	419	3	100	100	100	100	-	-	-	-	-	-	-	-	-
ECDC_UK18_18NO050	2018	United Kingdom	Not stated	EuroGASP2018	PRJEB34068	ERR9839303	SAMEA6106673	No data	S	No data	R	0.125	S	0.06	S	0.03	S	>0,06	R	No data	I	new	7738	new	1599	59	39	67	157	148	153	65	1340	43.002	122	100	100	7	6	100	-	-	-	-	tetM	rpsJ_V57M	-	-	-
ECDC_UK18_18NP016	2018	United Kingdom	Not stated	EuroGASP2018	PRJEB34068	ERR9838481	SAMEA6105996	No data	S	No data	I	0.125	R	0.06	S	0.015	S	<=0,06	S	No data	I	13892	8032	29	1580	126	39	67	111	148	153	133	3711	93.001	419	3	100	100	100	100	-	-	-	-	-	-	-	-	-
ECDC_UK18_18RE019	2018	United Kingdom	Not stated	EuroGASP2018	PRJEB34068	ERR9838505	SAMEA6106174	No data	S	No data	R	0.125	S	0.06	S	0.015	S	>0,06	R	No data	R	new	new	1971	1583	59	39	67	111	148	153	65	3693	43.002	122	62	100	7	6	100	-	-	-	blaTEM	tetM	rpsJ_V57M	-	-	-
ECDC_UK18_18WW062	2018	United Kingdom	Not stated	EuroGASP2018	PRJEB34068	ERR9837893	SAMEA6105796	No data	S	No data	I	0.125	S	0.015	S	0.008	S	<=0,06	S	No data	I	2	2	16	8163	59	39	170	111	188	71	223	84	22.001	15	100	100	100	7	100	-	-	-	-	-	rpsJ_V57M	-	-	-
ECDC_UK18_18WW063	2018	United Kingdom	Not stated	EuroGASP2018	PRJEB34068	ERR9838084	SAMEA6106676	No data	S	No data	I	4	R	0.03	S	0.015	S	>0,06	R	No data	I	12302	908	267	9363	126	39	67	238	148	153	133	168	2.001	39	11	100	7	4	100	-	-	-	-	-	rpsJ_V57M	-	porB1b_G120K	-
ECDC_UK18_NI18001	2018	United Kingdom	Not stated	EuroGASP2018	PRJEB34068	ERR9838514	SAMEA6106022	No data	S	No data	R	0.125	S	0.125	S	0.06	S	>0,06	R	No data	R	10386	246	4	7827	59	39	67	158	148	153	65	38	13.001	19	8	1	1	9	100	-	-	-	-	-	rpsJ_V57M	-	porB1b_G120K	porB1b_A121D
ECDC_UK18_NI18002	2018	United Kingdom	Not stated	EuroGASP2018	PRJEB34068	ERR9838515	SAMEA6106025	No data	S	No data	R	0.125	S	0.015	S	<=0,004	S	>0,06	R	No data	I	10713	2429	272	1583	59	39	67	111	148	153	65	2197	2.001	54	14	100	1	59	100	-	-	-	-	tetM	rpsJ_V57M	-	-	-
ECDC_UK18_NI18003	2018	United Kingdom	Not stated	EuroGASP2018	PRJEB34068	ERR9838276	SAMEA6106024	No data	S	No data	R	0.125	S	0.06	S	0.015	S	>0,06	R	No data	R	14769	55	1971	1583	59	39	67	111	148	153	65	3543	43.002	122	1	1	7	6	100	-	-	-	blaTEM	tetM	rpsJ_V57M	-	-	-
ECDC_UK18_NI18004	2018	United Kingdom	Not stated	EuroGASP2018	PRJEB34068	ERR9838108	SAMEA6106026	No data	S	No data	R	<=0,06	S	0.015	S	<=0,004	S	>0,06	R	No data	I	10713	2429	272	1583	59	39	67	111	148	153	65	2197	2.001	54	14	100	1	59	100	-	-	-	-	tetM	rpsJ_V57M	-	-	-
ECDC_UK18_NI18006	2018	United Kingdom	Not stated	EuroGASP2018	PRJEB34068	ERR9838353	SAMEA6106028	No data	S	No data	R	0.25	S	0.06	S	0.015	S	>0,06	R	No data	R	14769	55	1971	1583	59	39	67	111	148	153	65	3543	43.002	122	1	1	7	6	100	-	-	-	blaTEM	tetM	rpsJ_V57M	-	-	-
ECDC_UK18_NI18008	2018	United Kingdom	Not stated	EuroGASP2018	PRJEB34068	ERR9838252	SAMEA6105974	No data	S	No data	I	0.125	R	0.06	S	0.03	S	>0,06	S	No data	I	new	new	29	1580	126	39	67	111	148	153	133	1038	93.001	25	3	100	100	100	2	-	-	23S_rDNA_c2597t	-	-	rpsJ_V57M	-	-	-
ECDC_UK18_NI18015	2018	United Kingdom	Not stated	EuroGASP2018	PRJEB34068	ERR9838388	SAMEA6106494	No data	S	No data	I	0.125	S	0.06	S	0.03	S	>0,06	S	No data	I	2	2	16	11975	59	39	762	111	188	71	223	84	22.001	15	100	100	100	7	100	-	-	-	-	-	rpsJ_V57M	-	-	-
ECDC_UK18_NI18019	2018	United Kingdom	Not stated	EuroGASP2018	PRJEB34068	ERR9838219	SAMEA6106164	No data	S	No data	R	0.25	S	0.06	S	0.015	S	<=0,06	R	No data	R	13234	6598	137	1588	59	39	67	158	148	71	65	3312	19.001	38	14	1	7	15	12	-	-	-	blaTEM	tetM	rpsJ_V57M	-	-	-
ECDC_UK18_NI18030	2018	United Kingdom	Not stated	EuroGASP2018	PRJEB34068	ERR9839240	SAMEA6106527	No data	S	No data	I	1	S	0.03	S	<=0,004	S	<=0,06	S	No data	R	2997	866	21	11982	126	39	67	238	148	153	65	883	2.001	9	8	100	100	100	100	-	-	-	-	-	rpsJ_V57M	-	porB1b_G120K	porB1b_A121D
ECDC_UK18_SCOT-01	2018	United Kingdom	Not stated	EuroGASP2018	PRJEB34068	ERR9838024	SAMEA6105936	No data	S	No data	R	0.06	S	0.03	S	<0,015	S	1	R	No data	R	15589	7738	1971	1583	59	39	67	111	148	153	65	1340	43.002	122	100	100	7	6	100	-	-	-	blaTEM	tetM	rpsJ_V57M	-	-	-
ECDC_UK18_SCOT-03	2018	United Kingdom	Not stated	EuroGASP2018	PRJEB34068	ERR9838406	SAMEA6105583	No data	S	No data	I	0.03	S	<0,015	S	<0,015	S	<=0,004	S	No data	I	2992	1808	29	11864	126	39	785	238	148	153	133	439	2.001	9	1	100	100	1	100	-	-	-	-	-	rpsJ_V57M	-	-	-
ECDC_UK18_SCOT-04	2018	United Kingdom	Not stated	EuroGASP2018	PRJEB34068	ERR9837708	SAMEA6105940	No data	S	No data	I	1	R	<0,015	S	<0,015	S	>1	R	No data	I	12302	908	267	9363	126	39	67	238	148	153	133	168	2.001	39	11	100	7	4	100	-	-	-	-	-	rpsJ_V57M	-	porB1b_G120K	-
ECDC_UK18_SCOT-05	2018	United Kingdom	Not stated	EuroGASP2018	PRJEB34068	ERR9837710	SAMEA6105941	No data	S	No data	R	0.03	S	0.03	S	<0,015	S	0.5	R	No data	R	5441	30	18	1583	59	39	67	111	148	153	65	539	43.002	122	1	100	7	6	100	-	-	-	blaTEM	tetM	rpsJ_V57M	-	-	-
ECDC_UK18_SCOT-06	2018	United Kingdom	Not stated	EuroGASP2018	PRJEB34068	ERR9838033	SAMEA6105942	No data	S	No data	R	0.03	S	0.03	S	<0,015	S	0.5	R	No data	R	5441	30	18	1583	59	39	67	111	148	153	65	539	43.002	122	1	100	7	6	100	-	-	-	blaTEM	tetM	rpsJ_V57M	-	-	-
ECDC_UK18_SCOT-07	2018	United Kingdom	Not stated	EuroGASP2018	PRJEB34068	ERR9838517	SAMEA6105850	No data	S	No data	I	0.03	S	<0,015	S	<0,015	S	0.008	S	No data	I	new	new	29	1580	126	39	67	111	148	153	133	182	2.001	25	3	100	100	100	100	-	-	-	-	-	rpsJ_V57M	-	-	-
ECDC_UK18_SCOT-08	2018	United Kingdom	Not stated	EuroGASP2018	PRJEB34068	ERR9838036	SAMEA6105946	No data	S	No data	I	0.03	S	0.03	S	<0,015	S	0.008	S	No data	I	new	new	29	1580	126	39	67	111	148	153	133	182	2.001	25	3	100	100	100	100	-	-	-	-	-	rpsJ_V57M	-	-	-
ECDC_UK18_SCOT-09	2018	United Kingdom	Not stated	EuroGASP2018	PRJEB34068	ERR9838040	SAMEA6105944	No data	S	No data	R	0.06	S	0.06	S	0.06	S	>1	R	No data	I	14700	3031	4	13489	59	39	67	158	148	153	918	1225	13.001	19	3	1	1	9	100	-	-	-	-	-	rpsJ_V57M	-	-	-
ECDC_UK18_SCOT-10	2018	United Kingdom	Not stated	EuroGASP2018	PRJEB34068	ERR9838044	SAMEA6105947	No data	S	No data	I	0.06	S	0.03	S	<0,015	S	0.003	S	No data	I	7651	263	29	1580	126	39	67	111	148	153	133	240	2.001	25	1	100	100	100	100	-	-	-	-	-	rpsJ_V57M	-	-	-
ECDC_UK18_SCOT-13	2018	United Kingdom	Not stated	EuroGASP2018	PRJEB34068	ERR9838417	SAMEA6106250	No data	S	No data	I	0.03	S	<0,015	S	<0,015	S	<=0,004	S	No data	I	72	58	16	11975	59	39	762	111	188	71	223	84	22.001	15	100	100	100	7	100	-	-	-	-	-	rpsJ_V57M	-	-	-
ECDC_UK18_SCOT-19	2018	United Kingdom	Not stated	EuroGASP2018	PRJEB34068	ERR9838057	SAMEA6105953	No data	S	No data	I	0.03	S	0.06	S	<0,015	S	0.008	S	No data	R	new	new	29	1580	126	39	67	111	148	153	133	182	2.001	25	3	100	100	100	100	-	-	-	blaTEM	-	rpsJ_V57M	-	-	-
SAMD00099403	2015	Japan	FC426	yahara2018	PRJDB6496	DRR124691	SAMD00099403	No data	S	No data	R	0.19	S	0.19	R	0.047	S	>32	R	No data	R	7381	4435	27	7819	59	39	67	78	152	153	65	2681	10.001	232	11	1	1	3	100	-	-	-	-	-	rpsJ_V57M	-	porB1b_G120K	-
SAMD00099406	2015	Japan	FC429	yahara2018	PRJDB6496	DRR124694	SAMD00099406	No data	S	No data	R	0.38	S	0.5	R	0.125	S	>32	R	No data	R	7381	4435	27	7819	59	39	67	78	152	153	65	3212	10.008	232	11	1	1	3	100	-	-	-	-	-	rpsJ_V57M	-	porB1b_G120K	-
SAMD00099410	2015	Japan	FC433	yahara2018	PRJDB6496	DRR124698	SAMD00099410	No data	S	No data	R	0.25	S	0.19	R	0.047	S	>32	R	No data	R	7381	4435	27	7819	59	39	67	78	152	153	65	2681	10.001	232	11	1	1	3	100	-	-	-	-	-	rpsJ_V57M	-	porB1b_G120K	-
SAMD00099417	2015	Japan	FC440	yahara2018	PRJDB6496	DRR124705	SAMD00099417	No data	S	No data	I	0.25	R	0.047	R	0.012	S	>32	R	No data	I	14198	3498	27	7819	59	39	67	78	152	153	65	2682	10.001	267	11	1	1	3	100	-	-	-	-	-	rpsJ_V57M	-	porB1b_G120K	-
SAMD00099420	2015	Japan	FC443	yahara2018	PRJDB6496	DRR124708	SAMD00099420	No data	S	No data	I	0.38	S	0.094	S	0.032	S	8	R	No data	I	14188	1138	1307	7358	109	39	67	78	149	153	133	1135	101.001	25	8	1	2	4	100	-	-	-	-	-	rpsJ_V57M	-	porB1b_G120K	porB1b_A121D
SAMD00099421	2015	Japan	FC444	yahara2018	PRJDB6496	DRR124709	SAMD00099421	No data	S	No data	R	0.25	S	0.125	R	0.047	S	8	R	No data	R	6780	4069	110	13839	59	39	67	78	152	153	918	319	10.001	1	11	1	1	3	100	-	-	-	-	-	rpsJ_V57M	-	porB1b_G120K	-
SAMD00099424	2015	Japan	FC447	yahara2018	PRJDB6496	DRR124712	SAMD00099424	No data	S	No data	I	0.25	S	0.064	S	0.016	S	12	R	No data	I	12688	242	1307	13841	109	39	67	78	895	153	133	1135	101.001	25	8	1	2	4	100	-	-	-	-	-	rpsJ_V57M	-	porB1b_G120K	porB1b_A121D
SAMD00099425	2015	Japan	FC448	yahara2018	PRJDB6496	DRR124713	SAMD00099425	No data	S	No data	I	0.25	S	0.094	S	0.023	S	6	R	No data	I	new	new	21	7358	109	39	67	78	149	153	133	2683	101.001	25	8	1	1	4	100	-	-	-	-	-	rpsJ_V57M	-	porB1b_G120K	porB1b_A121D
SAMD00099431	2015	Japan	FC454	yahara2018	PRJDB6496	DRR124719	SAMD00099431	No data	S	No data	R	0.25	S	0.094	R	0.032	S	12	R	No data	I	14234	8242	27	7819	59	39	67	78	152	153	65	new	10.001	19	100	1	1	3	new	-	-	-	-	-	rpsJ_V57M	-	-	-
SAMD00099432	2015	Japan	FC455	yahara2018	PRJDB6496	DRR124720	SAMD00099432	No data	S	No data	I	0.38	S	0.094	S	0.032	S	6	R	No data	I	12688	242	1307	7358	109	39	67	78	149	153	133	1135	101.001	25	8	1	2	4	100	-	-	-	-	-	rpsJ_V57M	-	porB1b_G120K	porB1b_A121D
SAMD00099433	2015	Japan	FC456	yahara2018	PRJDB6496	DRR124721	SAMD00099433	No data	S	No data	I	<0,016	S	<0,016	S	0.003	S	<0,002	S	No data	I	4207	1808	25	9362	126	39	67	238	147	153	133	63	2.001	9	1	100	100	100	100	-	-	-	-	-	rpsJ_V57M	-	-	-
SAMD00099446	2015	Japan	FC469	yahara2018	PRJDB6496	DRR124734	SAMD00099446	No data	S	No data	R	0.19	S	0.094	R	0.047	S	4	R	No data	I	14234	8242	27	7819	59	39	67	78	152	153	65	new	10.001	19	100	1	1	3	new	-	-	-	-	-	rpsJ_V57M	-	-	-
SAMD00099447	2015	Japan	FC470	yahara2018	PRJDB6496	DRR124735	SAMD00099447	No data	S	No data	R	0.19	S	0.094	R	0.032	S	4	R	No data	I	14234	8242	27	7819	59	39	67	78	152	153	65	2154	10.001	19	100	1	1	3	100	-	-	-	-	-	rpsJ_V57M	-	-	-
SAMD00099458	2015	Japan	FC481	yahara2018	PRJDB6496	DRR124746	SAMD00099458	No data	S	No data	I	0.25	S	0.064	S	0.008	S	8	R	No data	I	12688	242	1307	13841	109	39	67	78	895	153	133	1135	101.001	25	8	1	2	4	100	-	-	-	-	-	rpsJ_V57M	-	porB1b_G120K	porB1b_A121D
SAMD00099459	2015	Japan	FC482	yahara2018	PRJDB6496	DRR124747	SAMD00099459	No data	S	No data	R	0.19	S	0.023	S	0.012	S	12	R	No data	R	2083	1132	4	7827	59	39	67	158	148	153	65	3217	13.001	345	4	1	7	9	100	-	-	-	blaTEM	-	rpsJ_V57M	-	-	-
SAMD00099464	2015	Japan	FC487	yahara2018	PRJDB6496	DRR124752	SAMD00099464	No data	S	No data	R	0.25	S	0.125	R	0.023	S	4	R	No data	I	new	new	27	13839	59	39	67	78	152	153	918	2154	10.001	19	100	1	1	3	100	-	-	-	-	-	rpsJ_V57M	-	-	-
SAMD00099465	2015	Japan	FC488	yahara2018	PRJDB6496	DRR124753	SAMD00099465	No data	S	No data	R	>256	R	<0,016	S	0.004	S	16	R	No data	R	1866	581	33	10899	126	39	170	158	148	153	65	202	2.002	19	8	1	7	3	1	-	23S_rDNA_a2045g	-	-	tetM	rpsJ_V57M	-	porB1b_G120K	porB1b_A121D
SAMD00099467	2015	Japan	FC490	yahara2018	PRJDB6496	DRR124755	SAMD00099467	No data	S	No data	R	0.38	S	<0,016	S	0.008	S	8	R	No data	I	1614	1053	33	13842	126	39	67	158	148	153	925	283	9.001	1	8	1	1	2	100	-	-	-	-	-	rpsJ_V57M	-	porB1b_G120K	porB1b_A121D
SAMD00099471	2015	Japan	FC494	yahara2018	PRJDB6496	DRR124759	SAMD00099471	No data	S	No data	I	0.25	S	0.064	S	0.008	S	4	R	No data	I	new	new	21	7358	109	39	67	78	149	153	133	2683	101.001	25	8	1	1	4	100	-	-	-	-	-	rpsJ_V57M	-	porB1b_G120K	porB1b_A121D
SAMD00099474	2015	Japan	FC497	yahara2018	PRJDB6496	DRR124762	SAMD00099474	No data	S	No data	I	0.19	S	0.047	S	0.003	S	4	R	No data	I	6785	2103	1307	13841	109	39	67	78	895	153	133	1135	101.001	25	8	1	2	4	100	-	-	-	-	-	rpsJ_V57M	-	porB1b_G120K	porB1b_A121D
SAMD00099481	2015	Japan	FC504	yahara2018	PRJDB6496	DRR124769	SAMD00099481	No data	S	No data	R	0.25	S	0.19	R	0.047	S	>32	R	No data	R	new	new	27	7819	59	39	67	78	152	153	65	2681	10.001	232	11	1	1	3	100	-	-	-	-	-	rpsJ_V57M	-	porB1b_G120K	-
SAMD00099487	2015	Japan	FC510	yahara2018	PRJDB6496	DRR124775	SAMD00099487	No data	S	No data	R	0.19	S	0.032	S	0.032	S	12	R	No data	R	2083	1132	4	7827	59	39	67	158	148	153	65	3217	13.001	345	4	1	7	9	100	-	-	-	blaTEM	-	rpsJ_V57M	-	-	-
SAMD00099488	2015	Japan	FC511	yahara2018	PRJDB6496	DRR124776	SAMD00099488	No data	S	No data	R	0.25	S	0.032	S	0.032	S	12	R	No data	R	2083	1132	4	7827	59	39	67	158	148	153	65	3217	13.001	345	4	1	7	9	100	-	-	-	blaTEM	-	rpsJ_V57M	-	-	-
SAMD00099492	2015	Japan	FC515	yahara2018	PRJDB6496	DRR124780	SAMD00099492	No data	S	No data	I	0.38	S	0.125	S	0.032	S	8	R	No data	I	12688	242	1307	13841	109	39	67	78	895	153	133	1135	101.001	25	8	1	2	4	100	-	-	-	-	-	rpsJ_V57M	-	porB1b_G120K	porB1b_A121D
SAMD00099511	2015	Japan	FC534	yahara2018	PRJDB6496	DRR124799	SAMD00099511	No data	S	No data	I	0.19	S	0.19	S	0.023	S	4	R	No data	I	12688	242	1307	13841	109	39	67	78	895	153	133	1135	101.001	25	8	1	2	4	100	-	-	-	-	-	rpsJ_V57M	-	porB1b_G120K	porB1b_A121D
SAMD00099512	2015	Japan	FC535	yahara2018	PRJDB6496	DRR124800	SAMD00099512	No data	S	No data	R	0.023	S	<0,016	S	0.004	S	0.5	R	No data	I	1614	1053	33	13842	126	39	67	158	148	153	925	283	9.001	1	8	1	1	2	100	-	-	-	-	-	rpsJ_V57M	-	porB1b_G120K	porB1b_A121D
SAMD00099513	2015	Japan	FC536	yahara2018	PRJDB6496	DRR124801	SAMD00099513	No data	S	No data	R	0.023	S	<0,016	S	0.004	S	0.75	R	No data	I	1614	1053	33	13842	126	39	67	158	148	153	925	283	9.001	1	8	1	1	2	100	-	-	-	-	-	rpsJ_V57M	-	porB1b_G120K	porB1b_A121D
SAMD00099518	2015	Japan	FC541	yahara2018	PRJDB6496	DRR124806	SAMD00099518	No data	S	No data	I	0.19	S	0.125	S	0.012	S	4	R	No data	I	new	5888	1307	13841	109	39	67	78	895	153	133	3213	101.001	25	11	1	2	4	100	-	-	-	-	-	rpsJ_V57M	-	porB1b_G120K	-
SAMD00099520	2015	Japan	FC543	yahara2018	PRJDB6496	DRR124808	SAMD00099520	No data	S	No data	I	0.125	S	0.19	S	0.023	S	3	R	No data	I	new	1447	1307	13841	109	39	67	78	895	153	133	1135	101.001	25	8	1	2	4	100	-	-	-	-	-	rpsJ_V57M	-	porB1b_G120K	porB1b_A121D
SAMD00099528	2015	Japan	IT67	yahara2018	PRJDB6496	DRR124816	SAMD00099528	No data	S	No data	R	0.19	S	0.25	R	0.047	S	>32	R	No data	R	7381	4435	27	7819	59	39	67	78	152	153	65	2681	10.001	232	11	1	1	3	100	-	-	-	-	-	rpsJ_V57M	-	porB1b_G120K	-
SAMD00099533	2015	Japan	IT72	yahara2018	PRJDB6496	DRR124821	SAMD00099533	No data	S	No data	I	0.5	S	<0,016	S	0.004	S	<0,002	S	No data	I	4207	1808	25	9362	126	39	67	238	147	153	133	63	2.001	9	1	100	100	100	100	-	-	-	-	-	rpsJ_V57M	-	-	-
SAMD00099534	2015	Japan	IT73	yahara2018	PRJDB6496	DRR124822	SAMD00099534	No data	S	No data	I	0.25	S	<0,016	S	0.008	S	<0,002	S	No data	I	4207	1808	25	9362	126	39	67	238	147	153	133	63	2.001	9	1	100	100	100	100	-	-	-	-	-	rpsJ_V57M	-	-	-
SAMD00099536	2015	Japan	IT75	yahara2018	PRJDB6496	DRR124824	SAMD00099536	No data	S	No data	I	0.25	S	0.064	S	0.012	S	4	R	No data	I	new	new	21	7358	109	39	67	78	149	153	133	2683	101.001	25	8	1	1	4	100	-	-	-	-	-	rpsJ_V57M	-	porB1b_G120K	porB1b_A121D
SAMD00099541	2015	Japan	KM249	yahara2018	PRJDB6496	DRR124829	SAMD00099541	No data	S	No data	R	0.25	S	0.125	R	0.032	S	>32	R	No data	R	7381	4435	27	7819	59	39	67	78	152	153	65	2681	10.001	232	11	1	1	3	100	-	-	-	-	-	rpsJ_V57M	-	porB1b_G120K	-
SAMD00099548	2015	Japan	KM256	yahara2018	PRJDB6496	DRR124836	SAMD00099548	No data	S	No data	I	0.25	S	0.19	S	0.023	S	12	R	No data	I	6762	4	1307	7358	109	39	67	78	149	153	133	1135	101.001	25	8	1	2	4	100	-	-	-	-	-	rpsJ_V57M	-	porB1b_G120K	porB1b_A121D
SAMD00099560	2015	Japan	KM268	yahara2018	PRJDB6496	DRR124848	SAMD00099560	No data	S	No data	I	0.5	S	<0,016	S	0.006	S	0.003	S	No data	I	4207	1808	25	9362	126	39	67	238	147	153	133	63	2.001	9	1	100	100	100	100	-	-	-	-	-	rpsJ_V57M	-	-	-
SAMD00099564	2015	Japan	KM272	yahara2018	PRJDB6496	DRR124852	SAMD00099564	No data	S	No data	I	0.25	S	0.094	S	0.023	S	>32	R	No data	I	6762	4	1307	7358	109	39	67	78	149	153	133	1135	101.001	25	8	1	2	4	100	-	-	-	-	-	rpsJ_V57M	-	porB1b_G120K	porB1b_A121D
SAMD00099566	2015	Japan	KM274	yahara2018	PRJDB6496	DRR124854	SAMD00099566	No data	S	No data	I	<0,016	S	0.032	S	0.008	S	3	R	No data	I	new	new	21	7358	109	39	67	78	149	153	133	2683	101.001	25	8	1	1	4	100	-	-	-	-	-	rpsJ_V57M	-	porB1b_G120K	porB1b_A121D
SAMD00099572	2015	Japan	KM280	yahara2018	PRJDB6496	DRR124860	SAMD00099572	No data	S	No data	R	<0,016	S	0.032	R	0.016	S	2	R	No data	R	7381	4435	27	7819	59	39	67	78	152	153	65	2681	10.001	232	11	1	1	3	100	-	-	-	-	-	rpsJ_V57M	-	porB1b_G120K	-
SAMD00099575	2015	Japan	KM283	yahara2018	PRJDB6496	DRR124863	SAMD00099575	No data	S	No data	R	0.19	S	0.094	R	0.047	S	12	R	No data	R	7381	4435	27	7819	59	39	67	78	152	153	65	2681	10.001	232	11	1	1	3	100	-	-	-	-	-	rpsJ_V57M	-	porB1b_G120K	-
SAMD00099577	2015	Japan	KM285	yahara2018	PRJDB6496	DRR124865	SAMD00099577	No data	S	No data	R	0.25	S	0.125	R	0.047	S	12	R	No data	R	new	new	27	7819	59	39	67	78	152	153	65	2697	10.001	232	26	1	1	3	100	-	-	-	-	-	rpsJ_V57M	-	porB1b_G120K	-
SAMD00099583	2015	Japan	KM291	yahara2018	PRJDB6496	DRR124871	SAMD00099583	No data	S	No data	I	0.38	S	0.094	S	0.016	S	6	R	No data	I	new	new	21	7358	109	39	67	78	149	153	133	2683	101.001	25	8	1	1	4	100	-	-	-	-	-	rpsJ_V57M	-	porB1b_G120K	porB1b_A121D
SAMD00099589	2015	Japan	KM297	yahara2018	PRJDB6496	DRR124877	SAMD00099589	No data	S	No data	R	0.25	S	0.125	R	0.023	S	24	R	No data	R	7381	4435	27	7819	59	39	67	78	152	153	65	2681	10.001	232	11	1	1	3	100	-	-	-	-	-	rpsJ_V57M	-	porB1b_G120K	-
SAMD00099591	2015	Japan	KM299	yahara2018	PRJDB6496	DRR124879	SAMD00099591	No data	S	No data	I	0.38	S	0.064	S	0.008	S	6	R	No data	I	6762	4	1307	13841	109	39	67	78	895	153	133	1135	101.001	25	8	1	2	4	100	-	-	-	-	-	rpsJ_V57M	-	porB1b_G120K	porB1b_A121D
SAMD00099599	2015	Japan	KM308	yahara2018	PRJDB6496	DRR124887	SAMD00099599	No data	S	No data	R	0.19	S	<0,016	S	<0,002	S	1.5	R	No data	I	13074	1840	137	1597	59	39	67	78	148	154	65	2699	2.002	304	14	100	1	18	100	-	-	-	-	tetM	rpsJ_V57M	-	-	-
SAMD00099601	2015	Japan	KM310	yahara2018	PRJDB6496	DRR124889	SAMD00099601	No data	S	No data	I	0.38	S	0.094	S	0.016	S	4	R	No data	I	new	new	21	7358	109	39	67	78	149	153	133	2683	101.001	25	8	1	1	4	100	-	-	-	-	-	rpsJ_V57M	-	porB1b_G120K	porB1b_A121D
SAMD00099602	2015	Japan	KM311	yahara2018	PRJDB6496	DRR124890	SAMD00099602	No data	S	No data	R	0.047	S	<0,016	S	<0,002	S	4	R	No data	R	6023	90	703	13476	435	39	67	78	148	71	65	1226	19.001	54	13	1	1	26	100	-	-	-	blaTEM	tetM	rpsJ_V57M	-	-	-
SAMD00105875	2015	Japan	GU040	yahara2018	PRJDB6504	DRR117955	SAMD00105875	No data	S	No data	I	0.25	S	0.5	R	0.125	S	No data	R	No data	I	12033	7032	10	7363	59	39	67	78	148	153	65	487	10.001	33	11	1	2	5	100	-	-	-	-	-	rpsJ_V57M	-	porB1b_G120K	-
SAMD00105884	2015	Japan	GU294	yahara2018	PRJDB6504	DRR117964	SAMD00105884	No data	S	No data	R	0.25	S	0.5	R	0.125	S	No data	R	No data	I	14234	8242	27	13839	59	39	67	78	152	153	918	2154	10.001	19	100	1	1	3	100	-	-	-	-	-	rpsJ_V57M	-	-	-
SAMD00105886	2015	Japan	GU309	yahara2018	PRJDB6504	DRR117966	SAMD00105886	No data	S	No data	I	0.25	S	0.004	S	0.002	S	No data	R	No data	I	14240	1543	27	7363	59	39	67	78	148	153	65	2676	100.001	33	16	1	2	5	100	-	-	-	-	-	rpsJ_V57M	-	-	-
SAMD00105889	2015	Japan	GU379	yahara2018	PRJDB6504	DRR117969	SAMD00105889	No data	S	No data	I	0.25	S	0.002	S	0.001	S	No data	R	No data	I	14240	1543	27	7363	59	39	67	78	148	153	65	2676	100.001	33	16	1	2	5	100	-	-	-	-	-	rpsJ_V57M	-	-	-
SAMD00105890	2015	Japan	GU384	yahara2018	PRJDB6504	DRR117970	SAMD00105890	No data	S	No data	R	1	S	0.25	R	0.06	S	No data	R	No data	I	14152	8175	10	7363	59	39	67	78	148	153	65	2678	10.001	1	100	1	2	5	100	-	-	-	-	-	rpsJ_V57M	-	-	-
SAMD00105895	2015	Japan	GU441	yahara2018	PRJDB6504	DRR117975	SAMD00105895	No data	S	No data	I	0.5	S	0.5	R	0.06	S	No data	R	No data	I	6543	3854	10	7363	59	39	67	78	148	153	65	487	10.001	33	11	1	2	5	100	-	-	-	-	-	rpsJ_V57M	-	porB1b_G120K	-
SAMD00105896	2015	Japan	GU442	yahara2018	PRJDB6504	DRR117976	SAMD00105896	No data	S	No data	I	0.25	S	0.002	S	0.001	S	No data	R	No data	I	14240	1543	27	7363	59	39	67	78	148	153	65	2676	100.001	33	16	1	2	5	100	-	-	-	-	-	rpsJ_V57M	-	-	-
SAMD00105897	2015	Japan	GU443	yahara2018	PRJDB6504	DRR117977	SAMD00105897	No data	S	No data	I	0.25	S	0.002	S	0.001	S	No data	R	No data	I	14240	1543	27	7363	59	39	67	78	148	153	65	2676	100.001	33	16	1	2	5	100	-	-	-	-	-	rpsJ_V57M	-	-	-
SAMD00105903	2015	Japan	GU512	yahara2018	PRJDB6504	DRR117983	SAMD00105903	No data	S	No data	R	2	S	0.25	R	0.03	S	No data	R	No data	I	14152	8175	10	7363	59	39	67	78	148	153	65	2678	10.001	1	100	1	2	5	100	-	-	-	-	-	rpsJ_V57M	-	-	-
SAMEA104147274	Not stated	United Kingdom	Not stated	town2020	PRJEB19989	ERR3577952	SAMEA104147274	No data	S	No data	R	No data	S	No data	S	No data	S	No data	S	No data	I	13487	55	18	11986	126	142	67	156	150	153	65	432	14.001	1	1	1	100	2	100	-	-	-	-	-	rpsJ_V57M	-	-	-
SAMEA104147290	2016	United Kingdom	Not stated	town2020	PRJEB19989	ERR3577968	SAMEA104147290	No data	S	No data	I	4	R	0.03	S	0.015	S	No data	R	0.5	I	12302	908	267	9363	126	39	67	238	148	153	133	168	2.001	39	11	100	7	4	100	-	-	-	-	-	rpsJ_V57M	-	porB1b_G120K	-
SAMEA104147306	2016	United Kingdom	Not stated	town2020	PRJEB19989	ERR3577984	SAMEA104147306	No data	S	No data	I	0.5	S	0.03	S	0.008	S	No data	S	0.25	I	new	new	29	12396	126	557	67	238	148	153	133	63	2.001	9	1	100	100	100	100	-	-	-	-	-	rpsJ_V57M	-	-	-
SAMEA104147318	2016	United Kingdom	Not stated	town2020	PRJEB19989	ERR3577996	SAMEA104147318	No data	S	No data	S	0.125	S	0.008	S	0.004	S	No data	S	0.125	I	new	6	16	11988	128	39	67	78	147	153	65	190	22.001	25	100	100	100	2	100	-	-	-	-	-	-	-	-	-
SAMEA104147333	2016	United Kingdom	Not stated	town2020	PRJEB19989	ERR3578011	SAMEA104147333	No data	S	No data	I	0.125	S	0.015	S	0.004	S	No data	S	0.125	I	2	2	16	8163	59	39	170	111	188	71	223	84	22.001	15	100	100	100	7	100	-	-	-	-	-	rpsJ_V57M	-	-	-
SAMEA104147334	2016	United Kingdom	Not stated	town2020	PRJEB19989	ERR3578013	SAMEA104147334	No data	S	No data	I	0.125	S	0.008	S	0.004	S	No data	S	0.125	I	2	2	16	8163	59	39	170	111	188	71	223	84	22.001	15	100	100	100	7	100	-	-	-	-	-	rpsJ_V57M	-	-	-
SAMEA104147344	2016	United Kingdom	Not stated	town2020	PRJEB19989	ERR3578020	SAMEA104147344	No data	S	No data	I	0.125	S	0.015	S	0.004	S	No data	S	0.125	I	2	2	16	8163	59	39	170	111	188	71	223	84	22.001	15	100	100	100	7	100	-	-	-	-	-	rpsJ_V57M	-	-	-
SAMEA104147345	2016	United Kingdom	Not stated	town2020	PRJEB19989	ERR3578023	SAMEA104147345	No data	S	No data	I	8	R	0.03	S	0.008	S	No data	S	0.5	I	3748	2264	29	1580	126	39	67	111	148	153	133	new	93.001	new	3	100	100	100	2	-	-	23S_rDNA_c2597t	-	-	rpsJ_V57M	-	-	-
SAMEA104147347	2016	United Kingdom	Not stated	town2020	PRJEB19989	ERR3578025	SAMEA104147347	No data	S	No data	I	0.125	S	0.015	S	0.004	S	No data	S	0.25	I	2	2	16	8163	59	39	170	111	188	71	223	84	22.001	15	100	100	100	7	100	-	-	-	-	-	rpsJ_V57M	-	-	-
SAMEA104147352	2016	United Kingdom	Not stated	town2020	PRJEB19989	ERR3578030	SAMEA104147352	No data	S	No data	R	0.25	S	0.015	S	0.004	S	No data	S	0.25	I	8465	4864	18	11986	126	142	67	156	150	153	65	162	14.001	1	100	1	100	2	100	-	-	-	-	-	rpsJ_V57M	-	-	-
SAMEA104147356	2016	United Kingdom	Not stated	town2020	PRJEB19989	ERR3578034	SAMEA104147356	No data	S	No data	I	0.25	S	0.03	S	0.008	S	No data	S	0.25	I	995	28	29	1580	126	39	67	111	148	153	133	301	2.001	9	3	100	100	100	100	-	-	-	-	-	rpsJ_V57M	-	-	-
SAMEA104147360	2016	United Kingdom	Not stated	town2020	PRJEB19989	ERR3578038	SAMEA104147360	No data	S	No data	R	1	S	0.015	S	0.008	S	No data	S	0.25	I	2992	1808	29	9363	126	39	67	238	148	153	133	new	2.001	new	1	100	100	100	100	-	-	-	-	-	rpsJ_V57M	-	-	-
SAMEA104147361	2016	United Kingdom	Not stated	town2020	PRJEB19989	ERR3578039	SAMEA104147361	No data	S	No data	I	0.25	S	0.03	S	0.03	S	No data	R	0.25	R	15589	7738	1971	1583	59	39	67	111	148	153	65	1340	43.002	122	100	100	7	6	100	-	-	-	blaTEM	-	rpsJ_V57M	-	-	-
SAMEA104147363	2016	United Kingdom	Not stated	town2020	PRJEB19989	ERR3578041	SAMEA104147363	No data	S	No data	R	1	S	0.015	S	0.008	S	No data	S	0.25	I	2992	1808	29	9363	126	39	67	238	148	153	133	new	2.001	new	1	100	100	100	100	-	-	-	-	-	rpsJ_V57M	-	-	-
SAMEA104147364	2016	United Kingdom	Not stated	town2020	PRJEB19989	ERR3578222	SAMEA104147364	No data	S	No data	I	0.125	S	0.015	S	0.004	S	No data	S	0.25	I	2	2	16	8163	59	39	170	111	188	71	223	84	22.001	15	100	100	100	7	100	-	-	-	-	-	rpsJ_V57M	-	-	-
SAMEA104147367	2016	United Kingdom	Not stated	town2020	PRJEB19989	ERR3578042	SAMEA104147367	No data	S	No data	R	0.125	S	0.015	S	0.03	S	No data	R	>4	I	5785	402	33	7822	126	39	170	111	148	153	65	new	18.001	19	14	100	7	3	new	-	-	-	-	tetM	rpsJ_V57M	-	-	-
SAMEA104147368	2016	United Kingdom	Not stated	town2020	PRJEB19989	ERR3578043	SAMEA104147368	No data	S	No data	R	0.25	S	0.06	S	0.03	S	No data	R	0.25	I	5785	402	33	7822	126	39	170	111	148	153	65	1883	18.001	19	14	100	7	3	100	-	-	-	-	tetM	rpsJ_V57M	-	-	-
SAMEA104147373	2016	United Kingdom	Not stated	town2020	PRJEB19989	ERR3578048	SAMEA104147373	No data	S	No data	I	0.125	S	0.015	S	0.004	S	No data	S	0.125	R	new	2	new	8163	59	39	170	111	188	71	223	new	new	15	100	100	100	7	100	-	-	-	blaTEM	-	rpsJ_V57M	-	-	-
SAMEA104147375	2016	United Kingdom	Not stated	town2020	PRJEB19989	ERR3578225	SAMEA104147375	No data	S	No data	R	0.125	S	0.015	S	0.004	S	No data	R	0.25	I	4530	2758	60	7823	435	39	170	111	148	153	65	847	1.001	1	14	1	7	2	100	-	-	-	-	tetM	-	-	-	-
SAMEA104147376	2016	United Kingdom	Not stated	town2020	PRJEB19989	ERR3578050	SAMEA104147376	No data	S	No data	I	0.25	S	0.015	S	0.008	S	No data	R	>4	R	5624	90	953	8130	59	39	170	78	149	154	65	426	2.002	40	13	100	7	4	100	-	-	-	blaTEM	-	rpsJ_V57M	-	-	-
SAMEA104147377	2016	United Kingdom	Not stated	town2020	PRJEB19989	ERR3578051	SAMEA104147377	No data	S	No data	I	0.25	S	0.015	S	0.008	S	No data	R	2	I	5624	90	953	8143	59	39	170	78	146	154	65	426	2.002	40	13	100	7	4	100	-	-	-	-	-	rpsJ_V57M	-	-	-
SAMEA104147378	2016	United Kingdom	Not stated	town2020	PRJEB19989	ERR3578052	SAMEA104147378	No data	S	No data	I	0.25	S	0.015	S	0.008	S	No data	R	0.25	I	5624	90	953	8143	59	39	170	78	146	154	65	426	2.002	40	13	100	7	4	100	-	-	-	-	-	rpsJ_V57M	-	-	-
SAMEA104147379	2016	United Kingdom	Not stated	town2020	PRJEB19989	ERR3578053	SAMEA104147379	No data	S	No data	I	0.25	S	0.03	S	0.008	S	No data	S	1	R	995	28	29	11999	126	39	67	111	148	783	133	245	2.001	9	3	1	100	100	100	-	-	-	blaTEM	-	rpsJ_V57M	-	-	-
SAMEA104147381	2016	United Kingdom	Not stated	town2020	PRJEB19989	ERR3578054	SAMEA104147381	No data	S	No data	R	0.06	S	0.015	S	0.008	S	No data	R	>4	R	new	361	1807	7827	59	39	67	158	148	153	65	new	19.001	18	100	1	7	new	100	-	-	-	blaTEM	tetM	rpsJ_V57M	-	-	-
SAMEA104147382	2016	United Kingdom	Not stated	town2020	PRJEB19989	ERR3578056	SAMEA104147382	No data	S	No data	I	0.25	S	0.015	S	0.008	S	No data	R	0.25	I	5624	90	953	8143	59	39	170	78	146	154	65	426	2.002	40	13	100	7	4	100	-	-	-	-	-	rpsJ_V57M	-	-	-
SAMEA104147387	2016	United Kingdom	Not stated	town2020	PRJEB19989	ERR3578061	SAMEA104147387	No data	S	No data	R	0.25	S	0.06	S	0.015	S	No data	R	0.25	I	292	28	4	13143	59	39	67	158	839	153	65	1225	13.001	19	3	1	1	9	100	-	-	-	-	-	rpsJ_V57M	-	-	-
SAMEA104147391	2016	United Kingdom	Not stated	town2020	PRJEB19989	ERR3578065	SAMEA104147391	No data	S	No data	I	1	R	0.015	S	0.015	S	No data	S	0.5	R	8241	4953	29	9363	126	39	67	238	148	153	133	193	2.001	39	11	100	100	100	100	-	-	-	blaTEM	-	rpsJ_V57M	-	porB1b_G120K	-
SAMEA104147392	2016	United Kingdom	Not stated	town2020	PRJEB19989	ERR3578066	SAMEA104147392	No data	S	No data	I	1	R	0.015	S	0.015	S	No data	S	0.5	I	8241	4953	29	9363	126	39	67	238	148	153	133	193	2.001	39	11	100	100	100	100	-	-	-	-	-	rpsJ_V57M	-	porB1b_G120K	-
SAMEA104147394	2016	United Kingdom	Not stated	town2020	PRJEB19989	ERR3578068	SAMEA104147394	No data	S	No data	I	0.5	S	0.03	S	0.015	S	No data	S	0.25	R	new	2656	241	9363	126	39	67	238	148	153	133	184	2.001	9	1	100	100	2	100	-	-	-	blaTEM	-	rpsJ_V57M	-	-	-
SAMEA104147395	2016	United Kingdom	Not stated	town2020	PRJEB19989	ERR3578069	SAMEA104147395	No data	S	No data	S	0.25	S	0.015	S	0.008	S	No data	S	0.06	I	576	39	16	11988	128	39	67	78	147	153	65	990	90.001	25	100	100	100	2	100	-	-	-	-	-	-	-	-	-
SAMEA104147406	2016	United Kingdom	Not stated	town2020	PRJEB19989	ERR3578080	SAMEA104147406	No data	S	No data	I	2	R	0.03	S	0.015	S	No data	R	0.5	I	12302	908	267	9363	126	39	67	238	148	153	133	168	2.001	39	11	100	7	4	100	-	-	-	-	-	rpsJ_V57M	-	porB1b_G120K	-
SAMEA104147407	2016	United Kingdom	Not stated	town2020	PRJEB19989	ERR3578226	SAMEA104147407	No data	S	No data	I	0.25	S	0.015	S	0.008	S	No data	R	>4	R	5624	90	953	11968	59	39	170	111	146	154	65	2936	2.001	40	13	100	7	4	100	-	-	-	blaTEM	-	rpsJ_V57M	-	-	-
SAMEA104147408	2016	United Kingdom	Not stated	town2020	PRJEB19989	ERR3578081	SAMEA104147408	No data	S	No data	R	0.125	S	0.06	S	0.03	S	No data	R	0.5	I	14886	3381	4	7827	59	39	67	158	148	153	65	175	13.001	19	1	1	1	9	100	-	-	-	-	-	rpsJ_V57M	-	-	-
SAMEA104147410	2016	United Kingdom	Not stated	town2020	PRJEB19989	ERR3578083	SAMEA104147410	No data	S	No data	I	No data	S	No data	S	No data	S	No data	R	No data	R	5624	90	953	8143	59	39	170	78	146	154	65	426	2.002	40	13	100	7	4	100	-	-	-	blaTEM	-	rpsJ_V57M	-	-	-
SAMEA104147422	2016	United Kingdom	Not stated	town2020	PRJEB19989	ERR3578094	SAMEA104147422	No data	S	No data	I	1	R	0.03	S	0.015	S	No data	S	0.5	I	8241	4953	29	9363	126	39	67	238	148	153	133	193	2.001	39	11	100	100	100	100	-	-	-	-	-	rpsJ_V57M	-	porB1b_G120K	-
SAMEA104147428	2016	United Kingdom	Not stated	town2020	PRJEB19989	ERR3578229	SAMEA104147428	No data	S	No data	I	0.25	S	0.015	S	0.008	S	No data	R	>4	R	9918	5860	953	13526	59	39	170	78	146	154	133	436	2.002	40	100	100	7	3	100	-	-	-	blaTEM	-	rpsJ_V57M	-	-	-
SAMEA104147434	2016	United Kingdom	Not stated	town2020	PRJEB19989	ERR3578104	SAMEA104147434	No data	S	No data	R	0.25	S	0.03	S	0.015	S	No data	S	0.5	I	10818	5606	1901	1893	59	39	67	157	147	153	133	705	9.001	58	1	1	100	2	100	-	-	-	-	tetM	rpsJ_V57M	rplD_G70D	-	-
SAMEA104147435	2016	United Kingdom	Not stated	town2020	PRJEB19989	ERR3578105	SAMEA104147435	No data	S	No data	I	0.25	S	0.015	S	0.008	S	No data	S	0.25	I	new	new	893	11428	126	39	170	238	734	153	133	63	2.001	9	1	100	100	100	100	-	-	-	-	-	rpsJ_V57M	-	-	-
SAMEA104147440	2016	United Kingdom	Not stated	town2020	PRJEB19989	ERR3578110	SAMEA104147440	No data	S	No data	I	0.25	S	0.015	S	0.008	S	No data	R	0.06	I	new	5523	18	13266	59	39	170	78	146	530	65	1804	2.002	40	1	100	7	4	100	-	-	-	-	-	rpsJ_V57M	-	-	-
SAMEA104147442	2016	United Kingdom	Not stated	town2020	PRJEB19989	ERR3578113	SAMEA104147442	No data	S	No data	I	0.5	S	0.015	S	0.008	S	No data	S	0.25	I	new	6094	29	11864	126	39	785	238	148	153	133	2620	2.001	9	3	100	100	1	100	-	-	-	-	-	rpsJ_V57M	-	-	-
SAMEA104147443	2016	United Kingdom	Not stated	town2020	PRJEB19989	ERR3578112	SAMEA104147443	No data	S	No data	I	0.25	S	0.015	S	0.008	S	No data	R	>4	R	5624	90	953	8143	59	39	170	78	146	154	65	426	2.002	40	13	100	7	4	100	-	-	-	blaTEM	-	rpsJ_V57M	-	-	-
SAMEA104147444	2016	United Kingdom	Not stated	town2020	PRJEB19989	ERR3578230	SAMEA104147444	No data	S	No data	I	0.5	S	0.015	S	0.008	S	No data	S	0.25	I	new	6094	29	11864	126	39	785	238	148	153	133	2620	2.001	9	3	100	100	1	100	-	-	-	-	-	rpsJ_V57M	-	-	-
SAMEA104147445	2016	United Kingdom	Not stated	town2020	PRJEB19989	ERR3578114	SAMEA104147445	No data	S	No data	I	0.5	S	0.015	S	0.008	S	No data	S	0.25	I	new	6094	29	11864	126	39	785	238	148	153	133	2620	2.001	9	3	100	100	1	100	-	-	-	-	-	rpsJ_V57M	-	-	-
SAMEA104147458	2016	United Kingdom	Not stated	town2020	PRJEB19989	ERR3578126	SAMEA104147458	No data	S	No data	I	0.03	S	0.008	S	0.004	S	No data	S	0.06	I	2	2	16	8163	59	39	170	111	188	71	223	84	22.001	15	100	100	100	7	100	-	-	-	-	-	rpsJ_V57M	-	-	-
SAMEA104147459	2016	United Kingdom	Not stated	town2020	PRJEB19989	ERR3578127	SAMEA104147459	No data	S	No data	R	0.25	S	0.06	S	0.03	S	No data	R	0.25	I	5785	402	33	7822	126	39	170	111	148	153	65	1883	18.001	19	14	100	7	3	100	-	-	-	-	tetM	rpsJ_V57M	-	-	-
SAMEA104147469	2016	United Kingdom	Not stated	town2020	PRJEB19989	ERR3578137	SAMEA104147469	No data	S	No data	I	0.25	S	0.008	S	0.004	S	No data	S	0.125	I	2992	1808	29	9363	126	39	67	238	148	153	133	63	2.001	9	1	100	100	100	100	-	-	-	-	-	rpsJ_V57M	-	-	-
SAMEA104147475	2016	United Kingdom	Not stated	town2020	PRJEB19989	ERR3578143	SAMEA104147475	No data	S	No data	R	0.25	S	0.03	S	0.03	S	No data	R	0.25	I	5785	402	33	7822	126	39	170	111	148	153	65	1883	18.001	19	14	100	7	3	100	-	-	-	-	tetM	rpsJ_V57M	-	-	-
SAMEA104147477	2016	United Kingdom	Not stated	town2020	PRJEB19989	ERR3578145	SAMEA104147477	No data	S	No data	I	0.125	S	0.015	S	0.004	S	No data	S	0.125	I	new	new	16	8163	59	39	170	111	188	71	223	84	22.001	15	100	100	100	7	100	-	-	-	-	-	rpsJ_V57M	-	-	-
SAMEA104147478	2016	United Kingdom	Not stated	town2020	PRJEB19989	ERR3578146	SAMEA104147478	No data	S	No data	I	0.125	S	0.015	S	0.004	S	No data	S	0.125	I	2	2	16	8163	59	39	170	111	188	71	223	84	22.001	15	100	100	100	7	100	-	-	-	-	-	rpsJ_V57M	-	-	-
SAMEA104147479	2016	United Kingdom	Not stated	town2020	PRJEB19989	ERR3578147	SAMEA104147479	No data	S	No data	R	0.25	S	0.06	S	0.03	S	No data	R	0.25	I	5785	402	33	7822	126	39	170	111	148	153	65	1883	18.001	19	14	100	7	3	100	-	-	-	-	tetM	rpsJ_V57M	-	-	-
SAMEA104147487	2016	United Kingdom	Not stated	town2020	PRJEB19989	ERR3578155	SAMEA104147487	No data	S	No data	I	0.5	S	0.125	R	0.015	S	No data	S	0.25	I	new	3059	893	11428	126	39	170	238	734	153	133	454	34.001	9	1	100	100	100	100	-	-	-	-	-	rpsJ_V57M	-	-	-
SAMEA104147493	2016	United Kingdom	Not stated	town2020	PRJEB19989	ERR3578161	SAMEA104147493	No data	S	No data	R	0.25	S	0.06	S	0.03	S	No data	R	0.5	R	10386	246	4	7827	59	39	67	158	148	153	65	38	13.001	19	8	1	1	9	100	-	-	-	-	-	rpsJ_V57M	-	porB1b_G120K	porB1b_A121D
SAMEA104147495	2016	United Kingdom	Not stated	town2020	PRJEB19989	ERR3578163	SAMEA104147495	No data	S	No data	I	0.125	S	0.015	S	0.008	S	No data	S	>4	R	6750	1706	76	16705	109	39	170	158	148	71	65	new	4.001	35	8	1	100	7	100	-	-	-	blaTEM	-	rpsJ_V57M	-	porB1b_G120K	porB1b_A121D
SAMEA104147496	2016	United Kingdom	Not stated	town2020	PRJEB19989	ERR3578164	SAMEA104147496	No data	S	No data	I	0.25	S	0.015	S	0.008	S	No data	R	>4	R	568	90	33	8143	59	39	170	78	146	154	65	426	2.002	40	13	100	7	4	100	-	-	-	blaTEM	-	rpsJ_V57M	-	-	-
SAMEA104147501	2016	United Kingdom	Not stated	town2020	PRJEB19989	ERR3578169	SAMEA104147501	No data	S	No data	I	0.125	S	0.015	S	0.008	S	No data	R	>4	I	568	90	33	8143	59	39	170	78	146	154	65	426	2.002	40	13	100	7	4	100	-	-	-	-	-	rpsJ_V57M	-	-	-
SAMEA104147504	2016	United Kingdom	Not stated	town2020	PRJEB19989	ERR3578172	SAMEA104147504	No data	S	No data	I	0.5	R	0.015	S	0.008	S	No data	S	0.5	I	8241	4953	29	9363	126	39	67	238	148	153	133	193	2.001	39	11	100	100	100	100	-	-	-	-	-	rpsJ_V57M	-	porB1b_G120K	-
SAMEA104147510	2016	United Kingdom	Not stated	town2020	PRJEB19989	ERR3578176	SAMEA104147510	No data	S	No data	R	0.125	S	0.03	S	0.008	S	No data	R	0.25	I	2	2	16	1588	59	39	67	158	148	71	65	870	19.001	15	100	1	7	15	100	-	-	-	-	tetM	rpsJ_V57M	-	-	-
SAMEA104147512	2016	United Kingdom	Not stated	town2020	PRJEB19989	ERR3578177	SAMEA104147512	No data	S	No data	R	0.125	S	0.06	S	0.06	S	No data	R	0.125	I	5785	402	33	7822	126	39	170	111	148	153	65	957	88.001	19	14	100	7	3	100	-	-	-	-	tetM	rpsJ_V57M	-	-	-
SAMEA104147514	2016	United Kingdom	Not stated	town2020	PRJEB19989	ERR3578179	SAMEA104147514	No data	S	No data	I	0.25	S	0.015	S	0.008	S	No data	R	0.25	I	340	90	4	8143	59	39	170	78	146	154	65	426	2.002	40	13	100	7	4	100	-	-	-	-	-	rpsJ_V57M	-	-	-
SAMEA104147516	2016	United Kingdom	Not stated	town2020	PRJEB19989	ERR3578182	SAMEA104147516	No data	S	No data	I	No data	S	No data	S	No data	S	No data	S	No data	I	2	2	16	8163	59	39	170	111	188	71	223	84	22.001	15	100	100	100	7	100	-	-	-	-	-	rpsJ_V57M	-	-	-
SAMEA104147521	2016	United Kingdom	Not stated	town2020	PRJEB19989	ERR3578186	SAMEA104147521	No data	S	No data	I	0.125	S	0.008	S	0.004	S	No data	S	0.125	I	2	2	16	8163	59	39	170	111	188	71	223	84	22.001	15	100	100	100	7	100	-	-	-	-	-	rpsJ_V57M	-	-	-
SAMEA104147529	2016	United Kingdom	Not stated	town2020	PRJEB19989	ERR3578196	SAMEA104147529	No data	S	No data	R	0.125	S	0.06	S	0.015	S	No data	R	0.5	R	14051	8111	4	7827	59	39	67	158	148	153	65	38	13.001	19	8	1	1	9	100	-	-	-	-	-	rpsJ_V57M	-	porB1b_G120K	porB1b_A121D
SAMEA104147530	2016	United Kingdom	Not stated	town2020	PRJEB19989	ERR3578198	SAMEA104147530	No data	S	No data	R	0.03	S	0.015	S	0.008	S	No data	R	0.125	R	2318	1053	4	7827	59	39	67	158	148	153	65	38	13.001	19	8	1	1	9	100	-	-	-	-	-	rpsJ_V57M	-	porB1b_G120K	porB1b_A121D
SAMEA104147531	Not stated	United Kingdom	Not stated	town2020	PRJEB19989	ERR3578199	SAMEA104147531	No data	S	No data	I	No data	R	No data	S	No data	S	No data	S	No data	I	14308	8289	29	1580	126	39	67	111	148	153	133	1996	2.001	25	42	100	100	100	1	-	23S_rDNA_a2045g	-	-	-	rpsJ_V57M	-	-	-
SAMEA104147532	Not stated	United Kingdom	Not stated	town2020	PRJEB19989	ERR3578200	SAMEA104147532	No data	S	No data	I	No data	S	No data	S	No data	S	No data	S	No data	I	7573	300	29	11999	126	39	67	111	148	783	133	new	2.001	9	3	1	100	100	5	-	-	-	-	-	rpsJ_V57M	-	-	-
SAMEA104147533	Not stated	United Kingdom	Not stated	town2020	PRJEB19989	ERR3578201	SAMEA104147533	No data	S	No data	I	No data	R	No data	S	No data	S	No data	S	No data	I	new	new	29	1580	126	39	67	111	148	153	133	192	2.001	25	3	100	100	100	1	-	23S_rDNA_a2045g	-	-	-	rpsJ_V57M	-	-	-
SAMEA104147534	Not stated	United Kingdom	Not stated	town2020	PRJEB19989	ERR3578203	SAMEA104147534	No data	S	No data	I	No data	R	No data	S	No data	S	No data	S	No data	I	649	442	29	1580	126	39	67	111	148	153	133	new	2.001	25	3	new	100	100	1	-	23S_rDNA_a2045g	-	-	-	rpsJ_V57M	-	-	-
SAMEA104147535	Not stated	United Kingdom	Not stated	town2020	PRJEB19989	ERR3578202	SAMEA104147535	No data	S	No data	I	No data	R	No data	S	No data	S	No data	S	No data	I	649	442	29	16470	126	882	67	111	148	153	133	192	2.001	25	3	100	100	100	1	-	23S_rDNA_a2045g	-	-	-	rpsJ_V57M	-	-	-
SAMEA104147536	2013	United Kingdom	Not stated	town2020	PRJEB19989	ERR3578204	SAMEA104147536	No data	S	No data	I	0.125	S	0.008	S	0.004	S	0.03	S	0.25	I	1313	847	29	1580	126	39	67	111	148	153	133	301	2.001	9	3	100	100	100	100	-	-	-	-	-	rpsJ_V57M	-	-	-
SAMEA104147540	2014	United Kingdom	Not stated	town2020	PRJEB19989	ERR3578208	SAMEA104147540	No data	S	No data	I	0.06	S	0.03	S	0.008	S	0.03	S	0.5	I	1108	2	35	1893	59	39	67	157	147	153	133	2580	9.001	25	100	100	100	2	100	-	-	-	-	-	rpsJ_V57M	-	-	-
SAMEA104147544	2013	United Kingdom	Not stated	town2020	PRJEB19989	ERR3578213	SAMEA104147544	No data	S	No data	I	0.06	S	0.015	S	0.008	S	0.03	S	0.25	I	9705	715	316	8163	59	39	170	111	188	71	223	84	22.001	15	100	100	100	7	100	-	-	-	-	-	rpsJ_V57M	-	-	-
SAMEA104147546	2014	United Kingdom	Not stated	town2020	PRJEB19989	ERR3578215	SAMEA104147546	No data	S	No data	I	0.03	S	0.008	S	0.002	S	0.03	S	0.06	I	2	2	16	8163	59	39	170	111	188	71	223	new	new	15	100	100	100	7	100	-	-	-	-	-	rpsJ_V57M	-	-	-
SAMEA104147549	2014	United Kingdom	Not stated	town2020	PRJEB19989	ERR3578217	SAMEA104147549	No data	S	No data	I	0.25	S	0.06	R	0.008	S	0.03	S	0.25	I	4244	1808	893	11428	126	39	170	238	734	153	133	454	34.001	9	1	100	100	100	100	-	-	-	-	-	rpsJ_V57M	-	-	-
SAMEA104147550	2014	United Kingdom	Not stated	town2020	PRJEB19989	ERR3578218	SAMEA104147550	No data	S	No data	I	0.25	S	0.015	S	0.004	S	>=16	R	>4	R	new	new	953	8143	59	39	170	78	146	154	65	436	2.002	40	100	100	7	3	100	-	-	-	blaTEM	-	rpsJ_V57M	-	-	-
SAMEA104147552	2014	United Kingdom	Not stated	town2020	PRJEB19989	ERR3578221	SAMEA104147552	No data	S	No data	I	0.25	S	0.008	S	0.004	S	8	R	>4	R	9918	5860	953	8143	59	39	170	78	146	154	65	436	2.002	40	100	100	7	3	100	-	-	-	blaTEM	-	rpsJ_V57M	-	-	-
SAMEA104147557	Not stated	United Kingdom	Not stated	town2020	PRJEB19989	ERR3577938	SAMEA104147557	No data	S	No data	I	No data	S	No data	S	No data	S	No data	S	No data	I	7573	300	29	11999	126	39	67	111	148	783	133	new	2.001	9	3	1	100	100	5	-	-	-	-	-	rpsJ_V57M	-	-	-
SAMEA104147558	Not stated	United Kingdom	Not stated	town2020	PRJEB19989	ERR3577940	SAMEA104147558	No data	S	No data	I	No data	R	No data	S	No data	S	No data	S	No data	I	8241	4953	29	9363	126	39	67	238	148	153	133	417	2.001	39	11	100	100	100	2	-	-	23S_rDNA_c2597t	-	-	rpsJ_V57M	-	porB1b_G120K	-
SAMEA104147559	Not stated	United Kingdom	Not stated	town2020	PRJEB19989	ERR3577939	SAMEA104147559	No data	S	No data	I	No data	R	No data	S	No data	S	No data	S	No data	I	8241	4953	29	9363	126	39	67	238	148	153	133	417	2.001	39	11	100	100	100	2	-	-	23S_rDNA_c2597t	-	-	rpsJ_V57M	-	porB1b_G120K	-
SAMEA104147560	Not stated	United Kingdom	Not stated	town2020	PRJEB19989	ERR3577941	SAMEA104147560	No data	S	No data	I	No data	S	No data	S	No data	S	No data	S	No data	I	7573	300	29	11999	126	39	67	111	148	783	133	new	2.001	9	3	1	100	100	5	-	-	-	-	-	rpsJ_V57M	-	-	-
SAMEA104147561	Not stated	United Kingdom	Not stated	town2020	PRJEB19989	ERR3577943	SAMEA104147561	No data	S	No data	I	No data	R	No data	S	No data	S	No data	S	No data	I	649	442	29	16470	126	882	67	111	148	153	133	192	2.001	25	3	100	100	100	1	-	23S_rDNA_a2045g	-	-	-	rpsJ_V57M	-	-	-
SAMEA104147562	Not stated	United Kingdom	Not stated	town2020	PRJEB19989	ERR3577942	SAMEA104147562	No data	S	No data	I	No data	R	No data	S	No data	S	No data	S	No data	I	649	442	29	16470	126	882	67	111	148	153	133	192	2.001	25	3	100	100	100	1	-	23S_rDNA_a2045g	-	-	-	rpsJ_V57M	-	-	-
SAMEA104147565	2015	United Kingdom	Not stated	town2020	PRJEB19989	ERR3577946	SAMEA104147565	No data	S	No data	R	0.25	S	0.06	S	0.03	S	1	R	4	R	12075	7057	1971	1583	59	39	67	111	148	153	65	1340	43.002	122	100	100	7	6	100	-	-	-	blaTEM	tetM	rpsJ_V57M	-	-	-
SAMEA104313215	2006	Australia	AUSMDU00005538	kwong2018	PRJEB17738	ERR2133910	SAMEA104313215	<=64	S	<=8	R	0.5	S	No data	S	<=0,03	S	8	R	0.25	I	147	53	21	1582	59	39	170	78	148	154	65	186	2.002	19	8	100	1	18	100	-	-	-	-	-	rpsJ_V57M	-	porB1b_G120K	porB1b_A121D
SAMEA104313216	2006	Australia	AUSMDU00005539	kwong2018	PRJEB17738	ERR2133911	SAMEA104313216	<=64	S	<=8	R	0.25	S	No data	S	<=0,03	S	8	R	0.25	I	147	53	21	1582	59	39	170	78	148	154	65	186	2.002	19	8	100	1	18	100	-	-	-	-	-	rpsJ_V57M	-	porB1b_G120K	porB1b_A121D
SAMEA104313217	2006	Australia	AUSMDU00005540	kwong2018	PRJEB17738	ERR2133912	SAMEA104313217	<=64	S	<=8	R	0.25	S	No data	S	<=0,03	S	8	R	0.25	I	147	53	21	1582	59	39	170	78	148	154	65	186	2.002	19	8	100	1	18	100	-	-	-	-	-	rpsJ_V57M	-	porB1b_G120K	porB1b_A121D
SAMEA104313234	2010	Australia	AUSMDU00005557	kwong2018	PRJEB17738	ERR2133929	SAMEA104313234	<=64	S	<=8	I	0.5	S	No data	S	<=0,008	S	<=0,03	S	0.25	I	2992	1808	29	9362	126	39	67	238	147	153	133	63	2.001	9	1	100	100	100	100	-	-	-	-	-	rpsJ_V57M	-	-	-
SAMEA104313238	2010	Australia	AUSMDU00005561	kwong2018	PRJEB17738	ERR2133933	SAMEA104313238	<=64	S	<=8	I	0.5	S	No data	S	<=0,008	S	<=0,03	S	0.25	I	2992	1808	29	9363	126	39	67	238	148	153	133	58	2.001	27	1	100	100	100	100	-	-	-	-	-	rpsJ_V57M	-	-	-
SAMEA104313239	2010	Australia	AUSMDU00005562	kwong2018	PRJEB17738	ERR2133934	SAMEA104313239	<=64	S	<=8	I	0.5	S	No data	S	<=0,008	S	<=0,03	S	0.25	I	2992	1808	29	9363	126	39	67	238	148	153	133	58	2.001	27	1	100	100	100	100	-	-	-	-	-	rpsJ_V57M	-	-	-
SAMEA104313240	2011	Australia	AUSMDU00005563	kwong2018	PRJEB17738	ERR2133935	SAMEA104313240	<=64	S	<=4	I	1	S	No data	S	<=0,008	S	<=0,03	S	0.125	I	2992	1808	29	9363	126	39	67	238	148	153	133	58	2.001	27	1	100	100	100	100	-	-	-	-	-	rpsJ_V57M	-	-	-
SAMEA104313241	2011	Australia	AUSMDU00005564	kwong2018	PRJEB17738	ERR2133936	SAMEA104313241	<=64	S	<=4	I	0.5	S	No data	S	<=0,008	S	<=0,03	S	0.125	I	2992	1808	29	9363	126	39	67	238	148	153	133	58	2.001	27	1	100	100	100	100	-	-	-	-	-	rpsJ_V57M	-	-	-
SAMEA104313245	2011	Australia	AUSMDU00005568	kwong2018	PRJEB17738	ERR2133940	SAMEA104313245	<=64	S	<=4	I	0.5	S	No data	S	<=0,008	S	<=0,03	S	0.25	I	6940	4143	29	9363	126	39	67	238	148	153	133	63	2.001	9	1	100	100	100	100	-	-	-	-	-	rpsJ_V57M	-	-	-
SAMEA104313246	2011	Australia	AUSMDU00005569	kwong2018	PRJEB17738	ERR2133941	SAMEA104313246	<=64	S	<=4	I	0.5	S	No data	S	<=0,008	S	<=0,03	S	0.25	I	6940	4143	29	9363	126	39	67	238	148	153	133	63	2.001	9	1	100	100	100	100	-	-	-	-	-	rpsJ_V57M	-	-	-
SAMEA104313249	2012	Australia	AUSMDU00005572	kwong2018	PRJEB17738	ERR2133944	SAMEA104313249	<=64	S	>8	R	0.125	S	No data	S	0.016	S	16	R	0.5	I	new	new	703	9364	435	39	67	158	148	71	65	567	19.001	38	12	1	7	26	100	-	-	-	-	tetM	rpsJ_V57M	-	porB1b_G120K	-
SAMEA104313250	2012	Australia	AUSMDU00005573	kwong2018	PRJEB17738	ERR2133945	SAMEA104313250	<=64	S	>8	R	0.125	S	No data	S	0.016	S	16	R	1	I	new	new	703	9364	435	39	67	158	148	71	65	567	19.001	38	12	1	7	26	100	-	-	-	-	tetM	rpsJ_V57M	-	porB1b_G120K	-
SAMEA104313251	2012	Australia	AUSMDU00005574	kwong2018	PRJEB17738	ERR2133946	SAMEA104313251	<=64	S	<=4	I	0.125	S	No data	S	0.016	S	<=0,03	S	1	I	359	301	29	8126	126	39	67	78	148	153	133	543	66.001	25	3	100	100	100	100	-	-	-	-	-	rpsJ_V57M	-	-	-
SAMEA104313252	2012	Australia	AUSMDU00005575	kwong2018	PRJEB17738	ERR2133947	SAMEA104313252	<=64	S	<=4	I	0.125	S	No data	S	0.016	S	<=0,03	S	1	I	359	301	29	8126	126	39	67	78	148	153	133	543	66.001	25	3	100	100	100	100	-	-	-	-	-	rpsJ_V57M	-	-	-
SAMEA104313253	2012	Australia	AUSMDU00005576	kwong2018	PRJEB17738	ERR2133948	SAMEA104313253	<=64	S	<=4	I	0.125	S	No data	S	0.016	S	<=0,03	S	1	I	359	301	29	8126	126	39	67	78	148	153	133	543	66.001	25	3	100	100	100	100	-	-	-	-	-	rpsJ_V57M	-	-	-
SAMEA104313271	2013	Australia	AUSMDU00005594	kwong2018	PRJEB17738	ERR2133966	SAMEA104313271	<=64	S	>8	R	<=0,06	S	No data	S	<=0,008	S	2	R	2	R	8602	5093	5	15728	59	39	67	78	682	153	65	new	14.001	54	1	1	1	9	100	-	-	-	blaTEM	tetM	rpsJ_V57M	-	-	-
SAMEA104313272	2013	Australia	AUSMDU00005595	kwong2018	PRJEB17738	ERR2133967	SAMEA104313272	<=64	S	>8	R	<=0,06	S	No data	S	<=0,008	S	2	R	1	R	8602	5093	5	15728	59	39	67	78	682	153	65	new	14.001	54	1	1	1	9	100	-	-	-	blaTEM	tetM	rpsJ_V57M	-	-	-
SAMEA104313273	2013	Australia	AUSMDU00005596	kwong2018	PRJEB17738	ERR2133968	SAMEA104313273	<=64	S	>8	R	<=0,06	S	No data	S	<=0,008	S	2	R	1	R	8602	5093	5	15728	59	39	67	78	682	153	65	new	14.001	54	1	1	1	9	100	-	-	-	blaTEM	tetM	rpsJ_V57M	-	-	-
SAMEA104313282	2014	Australia	AUSMDU00005605	kwong2018	PRJEB17738	ERR2133977	SAMEA104313282	<=64	S	<=4	R	<=0,06	S	No data	S	<=0,008	S	1	R	0.25	I	1614	1053	33	7828	126	39	67	158	148	153	133	283	9.001	1	8	1	1	2	100	-	-	-	-	-	rpsJ_V57M	-	porB1b_G120K	porB1b_A121D
SAMEA104313283	2014	Australia	AUSMDU00005606	kwong2018	PRJEB17738	ERR2133978	SAMEA104313283	<=64	S	<=4	R	<=0,06	S	No data	S	0.016	S	1	R	0.25	I	1614	1053	33	7828	126	39	67	158	148	153	133	283	9.001	1	8	1	1	2	100	-	-	-	-	-	rpsJ_V57M	-	porB1b_G120K	porB1b_A121D
SAMEA104313284	2014	Australia	AUSMDU00005607	kwong2018	PRJEB17738	ERR2133979	SAMEA104313284	<=64	S	<=4	I	0.25	S	No data	S	<=0,008	S	<=0,03	S	0.25	I	8709	2656	1579	15731	126	39	921	238	148	153	133	63	2.001	9	1	100	100	100	100	-	-	-	-	-	rpsJ_V57M	-	-	-
SAMEA104313285	2014	Australia	AUSMDU00005608	kwong2018	PRJEB17738	ERR2133980	SAMEA104313285	<=64	S	<=4	I	0.25	S	No data	S	<=0,008	S	<=0,03	S	0.25	I	8709	2656	1579	15731	126	39	921	238	148	153	133	63	2.001	9	1	100	100	100	100	-	-	-	-	-	rpsJ_V57M	-	-	-
SAMEA104313287	2014	Australia	AUSMDU00005610	kwong2018	PRJEB17738	ERR2133982	SAMEA104313287	<=64	S	<=4	I	0.125	S	No data	S	<=0,008	S	<=0,03	S	0.25	I	9654	1808	1744	11428	126	39	170	238	734	153	133	63	2.001	9	1	100	100	100	100	-	-	-	-	-	rpsJ_V57M	-	-	-
SAMEA104313288	2014	Australia	AUSMDU00005611	kwong2018	PRJEB17738	ERR2133983	SAMEA104313288	<=64	S	<=4	I	0.25	S	No data	S	<=0,008	S	<=0,03	S	0.25	I	9654	1808	1744	11428	126	39	170	238	734	153	133	63	2.001	9	1	100	100	100	100	-	-	-	-	-	rpsJ_V57M	-	-	-
SAMEA104313289	2014	Australia	AUSMDU00005612	kwong2018	PRJEB17738	ERR2133984	SAMEA104313289	<=64	S	<=4	I	0.25	S	No data	S	<=0,008	S	<=0,03	S	0.25	I	9654	1808	1744	11428	126	39	170	238	734	153	133	63	2.001	9	1	100	100	100	100	-	-	-	-	-	rpsJ_V57M	-	-	-
SAMEA104313290	2014	Australia	AUSMDU00005613	kwong2018	PRJEB17738	ERR2133985	SAMEA104313290	<=64	S	<=4	I	0.25	S	No data	S	<=0,008	S	<=0,03	S	0.25	I	9654	1808	1744	11428	126	39	170	238	734	153	133	63	2.001	9	1	100	100	100	100	-	-	-	-	-	rpsJ_V57M	-	-	-
SAMEA104347863	2007	Scotland	2007-12_1	fifer2018	PRJEB23008	ERR2172282	SAMEA104347863	No data	S	No data	I	No data	R	No data	S	No data	S	No data	S	No data	I	1704	1100	29	1580	126	39	67	111	148	153	133	192	2.001	25	3	100	100	100	1	-	23S_rDNA_a2045g	-	-	-	rpsJ_V57M	-	-	-
SAMEA104347864	2004	Scotland	2004-04_2	fifer2018	PRJEB23008	ERR2172294	SAMEA104347864	No data	S	No data	I	No data	R	No data	S	No data	S	No data	S	No data	I	470	339	29	1580	126	39	67	111	148	153	133	192	2.001	25	3	100	100	100	1	-	23S_rDNA_a2045g	-	-	-	rpsJ_V57M	-	-	-
SAMEA104347865	2004	Scotland	2004-06_3	fifer2018	PRJEB23008	ERR2172319	SAMEA104347865	No data	S	No data	I	No data	R	No data	S	No data	S	No data	S	No data	I	470	339	29	1580	126	39	67	111	148	153	133	192	2.001	25	3	100	100	100	1	-	23S_rDNA_a2045g	-	-	-	rpsJ_V57M	-	-	-
SAMEA104347866	2004	Scotland	2004-07_4	fifer2018	PRJEB23008	ERR2172344	SAMEA104347866	No data	S	No data	I	No data	S	No data	S	No data	S	No data	S	No data	I	649	442	29	1580	126	39	67	111	148	153	133	182	2.001	25	3	100	100	100	100	-	-	-	-	-	rpsJ_V57M	rplD_G70D	-	-
SAMEA104347867	2005	Scotland	2005-02_5	fifer2018	PRJEB23008	ERR2172306	SAMEA104347867	No data	S	No data	I	No data	R	No data	S	No data	S	No data	S	No data	I	470	339	29	1580	126	39	67	111	148	153	133	192	2.001	25	3	100	100	100	1	-	23S_rDNA_a2045g	-	-	-	rpsJ_V57M	-	-	-
SAMEA104347868	2006	Scotland	2006-06_6	fifer2018	PRJEB23008	ERR2172261	SAMEA104347868	No data	S	No data	I	No data	R	No data	S	No data	S	No data	S	No data	I	649	442	29	1580	126	39	67	111	148	153	133	192	2.001	25	3	100	100	100	1	-	23S_rDNA_a2045g	-	-	-	rpsJ_V57M	-	-	-
SAMEA104347869	2006	Scotland	2006-07_7	fifer2018	PRJEB23008	ERR2172264	SAMEA104347869	No data	S	No data	I	No data	R	No data	S	No data	S	No data	S	No data	I	649	442	29	1580	126	39	67	111	148	153	133	192	2.001	25	3	100	100	100	1	-	23S_rDNA_a2045g	-	-	-	rpsJ_V57M	-	-	-
SAMEA104347870	2006	Scotland	2006-08_8	fifer2018	PRJEB23008	ERR2172331	SAMEA104347870	No data	S	No data	I	No data	R	No data	S	No data	S	No data	S	No data	I	1443	927	29	1580	126	39	67	111	148	153	133	192	2.001	25	3	100	100	100	1	-	23S_rDNA_a2045g	-	-	-	rpsJ_V57M	-	-	-
SAMEA104347871	2006	Scotland	2006-11_9	fifer2018	PRJEB23008	ERR2172299	SAMEA104347871	No data	S	No data	I	No data	R	No data	S	No data	S	No data	S	No data	I	1704	1100	29	1580	126	39	67	111	148	153	133	192	2.001	25	3	100	100	100	1	-	23S_rDNA_a2045g	-	-	-	rpsJ_V57M	-	-	-
SAMEA104347872	2007	Scotland	2007-02_10	fifer2018	PRJEB23008	ERR2172323	SAMEA104347872	No data	S	No data	I	No data	R	No data	S	No data	S	No data	S	No data	I	2152	1347	29	1580	126	39	67	111	148	153	133	192	2.001	25	3	100	100	100	1	-	23S_rDNA_a2045g	-	-	-	rpsJ_V57M	-	-	-
SAMEA104347873	2007	Scotland	2007-03_11	fifer2018	PRJEB23008	ERR2172281	SAMEA104347873	No data	S	No data	I	No data	R	No data	S	No data	S	No data	S	No data	I	1443	927	29	1580	126	39	67	111	148	153	133	192	2.001	25	3	100	100	100	1	-	23S_rDNA_a2045g	-	-	-	rpsJ_V57M	-	-	-
SAMEA104347874	2007	Scotland	2007-03_12	fifer2018	PRJEB23008	ERR2172275	SAMEA104347874	No data	S	No data	I	No data	R	No data	S	No data	S	No data	S	No data	I	2193	1375	29	1580	126	39	67	111	148	153	133	192	2.001	25	3	100	100	100	1	-	23S_rDNA_a2045g	-	-	-	rpsJ_V57M	-	-	-
SAMEA104347875	2007	Scotland	2007-08_13	fifer2018	PRJEB23008	ERR2172293	SAMEA104347875	No data	S	No data	I	No data	R	No data	S	No data	S	No data	S	No data	I	1704	1100	29	1580	126	39	67	111	148	153	133	192	2.001	25	3	100	100	100	1	-	23S_rDNA_a2045g	-	-	-	rpsJ_V57M	-	-	-
SAMEA104347876	2007	Scotland	2007-08_14	fifer2018	PRJEB23008	ERR2172314	SAMEA104347876	No data	S	No data	I	No data	R	No data	S	No data	S	No data	S	No data	I	1443	927	29	1580	126	39	67	111	148	153	133	192	2.001	25	3	100	100	100	1	-	23S_rDNA_a2045g	-	-	-	rpsJ_V57M	-	-	-
SAMEA104347877	2009	United Kingdom	2009-06_15	fifer2018	PRJEB23008	ERR2172338	SAMEA104347877	No data	S	No data	I	No data	R	No data	S	No data	S	No data	S	No data	I	1443	927	29	1580	126	39	67	111	148	153	133	2172	131.001	25	3	100	100	100	1	-	23S_rDNA_a2045g	-	-	-	rpsJ_V57M	-	-	-
SAMEA104347878	2014	United Kingdom	2014-06_16	fifer2018	PRJEB23008	ERR2172262	SAMEA104347878	No data	S	No data	I	No data	R	No data	S	No data	S	No data	S	No data	I	14057	442	110	1580	126	39	67	111	148	153	133	192	2.001	25	3	100	100	100	1	-	23S_rDNA_a2045g	-	-	-	rpsJ_V57M	-	-	-
SAMEA104347879	2014	United Kingdom	2014-11_17	fifer2018	PRJEB23008	ERR2172321	SAMEA104347879	No data	S	No data	I	No data	R	No data	S	No data	S	No data	S	No data	I	9768	5759	29	1580	126	39	67	111	148	153	133	1996	2.001	25	42	100	100	100	1	-	23S_rDNA_a2045g	-	-	-	rpsJ_V57M	-	-	-
SAMEA104347880	2015	United Kingdom	2015-01_18	fifer2018	PRJEB23008	ERR2172313	SAMEA104347880	No data	S	No data	I	No data	R	No data	S	No data	S	No data	S	No data	I	9768	5759	29	1580	126	39	67	111	148	153	133	1996	2.001	25	42	100	100	100	1	-	23S_rDNA_a2045g	-	-	-	rpsJ_V57M	-	-	-
SAMEA104347881	2015	United Kingdom	2015-02_19	fifer2018	PRJEB23008	ERR2172287	SAMEA104347881	No data	S	No data	I	No data	R	No data	S	No data	S	No data	S	No data	I	9768	5759	29	1580	126	39	67	111	148	153	133	1996	2.001	25	42	100	100	100	1	-	23S_rDNA_a2045g	-	-	-	rpsJ_V57M	-	-	-
SAMEA104347882	2015	United Kingdom	2015-02_20	fifer2018	PRJEB23008	ERR2172305	SAMEA104347882	No data	S	No data	I	No data	R	No data	S	No data	S	No data	S	No data	I	9768	5759	29	1580	126	39	67	111	148	153	133	1996	2.001	25	42	100	100	100	1	-	23S_rDNA_a2045g	-	-	-	rpsJ_V57M	-	-	-
SAMEA104347883	2015	United Kingdom	2015-03_21	fifer2018	PRJEB23008	ERR2172286	SAMEA104347883	No data	S	No data	I	No data	R	No data	S	No data	S	No data	S	No data	I	9768	5759	29	1580	126	39	67	111	148	153	133	1996	2.001	25	42	100	100	100	1	-	23S_rDNA_a2045g	-	-	-	rpsJ_V57M	-	-	-
SAMEA104347884	2015	United Kingdom	2015-03_22	fifer2018	PRJEB23008	ERR2172266	SAMEA104347884	No data	S	No data	I	No data	R	No data	S	No data	S	No data	S	No data	I	9768	5759	29	1580	126	39	67	111	148	153	133	1996	2.001	25	42	100	100	100	1	-	23S_rDNA_a2045g	-	-	-	rpsJ_V57M	-	-	-
SAMEA104347885	2015	United Kingdom	2015-06_23	fifer2018	PRJEB23008	ERR2172334	SAMEA104347885	No data	S	No data	I	No data	R	No data	S	No data	S	No data	S	No data	I	9768	5759	29	1580	126	39	67	111	148	153	133	1996	2.001	25	42	100	100	100	1	-	23S_rDNA_a2045g	-	-	-	rpsJ_V57M	-	-	-
SAMEA104347886	2015	United Kingdom	2015-06_24	fifer2018	PRJEB23008	ERR2172258	SAMEA104347886	No data	S	No data	I	No data	R	No data	S	No data	S	No data	S	No data	I	9768	5759	29	1580	126	39	67	111	148	153	133	1996	2.001	25	42	100	100	100	1	-	23S_rDNA_a2045g	-	-	-	rpsJ_V57M	-	-	-
SAMEA104347887	2015	United Kingdom	2015-06_25	fifer2018	PRJEB23008	ERR2172349	SAMEA104347887	No data	S	No data	I	No data	R	No data	S	No data	S	No data	S	No data	I	9768	5759	29	1580	126	39	67	111	148	153	133	1996	2.001	25	42	100	100	100	1	-	23S_rDNA_a2045g	-	-	-	rpsJ_V57M	-	-	-
SAMEA104347888	2015	United Kingdom	2015-07_26	fifer2018	PRJEB23008	ERR2172317	SAMEA104347888	No data	S	No data	I	No data	R	No data	S	No data	S	No data	S	No data	I	9768	5759	29	1580	126	39	67	111	148	153	133	1996	2.001	25	42	100	100	100	1	-	23S_rDNA_a2045g	-	-	-	rpsJ_V57M	-	-	-
SAMEA104347889	2015	United Kingdom	2015-07_27	fifer2018	PRJEB23008	ERR2172265	SAMEA104347889	No data	S	No data	I	No data	R	No data	S	No data	S	No data	S	No data	I	9768	5759	29	1580	126	39	67	111	148	153	133	2573	2.001	25	42	100	19	100	1	-	23S_rDNA_a2045g	-	-	-	rpsJ_V57M	-	-	-
SAMEA104347890	2015	United Kingdom	2015-08_28	fifer2018	PRJEB23008	ERR2172337	SAMEA104347890	No data	S	No data	I	No data	R	No data	S	No data	S	No data	S	No data	I	9768	5759	29	1580	126	39	67	111	148	153	133	1996	2.001	25	42	100	100	100	1	-	23S_rDNA_a2045g	-	-	-	rpsJ_V57M	-	-	-
SAMEA104347891	2015	United Kingdom	2015-09_29	fifer2018	PRJEB23008	ERR2172296	SAMEA104347891	No data	S	No data	I	No data	R	No data	S	No data	S	No data	S	No data	I	9768	5759	29	1580	126	39	67	111	148	153	133	1996	2.001	25	42	100	100	100	1	-	23S_rDNA_a2045g	-	-	-	rpsJ_V57M	-	-	-
SAMEA104347892	2015	United Kingdom	2015-09_30	fifer2018	PRJEB23008	ERR2172274	SAMEA104347892	No data	S	No data	I	No data	R	No data	S	No data	S	No data	S	No data	I	9768	5759	29	1580	126	39	67	111	148	153	133	1996	2.001	25	42	100	100	100	1	-	23S_rDNA_a2045g	-	-	-	rpsJ_V57M	-	-	-
SAMEA104347893	2015	United Kingdom	2015-10_31	fifer2018	PRJEB23008	ERR2172278	SAMEA104347893	No data	S	No data	I	No data	R	No data	S	No data	S	No data	S	No data	I	13125	7630	29	1580	126	39	67	111	148	153	133	192	2.001	25	3	100	100	100	1	-	23S_rDNA_a2045g	-	-	-	rpsJ_V57M	-	-	-
SAMEA104347894	2015	United Kingdom	2015-09_32	fifer2018	PRJEB23008	ERR2172277	SAMEA104347894	No data	S	No data	S	No data	R	No data	S	No data	S	No data	S	No data	I	9768	5759	29	1580	126	39	67	111	148	153	133	1996	2.001	25	42	100	100	100	1	-	23S_rDNA_a2045g	-	-	-	-	-	-	-
SAMEA104347895	2015	United Kingdom	2015-10_33	fifer2018	PRJEB23008	ERR2172340	SAMEA104347895	No data	S	No data	I	No data	R	No data	S	No data	S	No data	S	No data	I	9768	5759	29	1580	126	39	67	111	148	153	133	1996	2.001	25	42	100	100	100	1	-	23S_rDNA_a2045g	-	-	-	rpsJ_V57M	-	-	-
SAMEA104347896	2015	United Kingdom	2015-10_34	fifer2018	PRJEB23008	ERR2172271	SAMEA104347896	No data	S	No data	I	No data	R	No data	S	No data	S	No data	S	No data	I	9768	5759	29	1580	126	39	67	111	148	153	133	1996	2.001	25	42	100	100	100	1	-	23S_rDNA_a2045g	-	-	-	rpsJ_V57M	-	-	-
SAMEA104347897	2015	United Kingdom	2015-10_35	fifer2018	PRJEB23008	ERR2172276	SAMEA104347897	No data	S	No data	I	No data	R	No data	S	No data	S	No data	S	No data	I	9768	5759	29	1580	126	39	67	111	148	153	133	1996	2.001	25	42	100	100	100	1	-	23S_rDNA_a2045g	-	-	-	rpsJ_V57M	-	-	-
SAMEA104347898	2015	United Kingdom	2015-11_36	fifer2018	PRJEB23008	ERR2172300	SAMEA104347898	No data	S	No data	I	No data	R	No data	S	No data	S	No data	S	No data	I	9768	5759	29	1580	126	39	67	111	148	153	133	1996	2.001	25	42	100	100	100	1	-	23S_rDNA_a2045g	-	-	-	rpsJ_V57M	-	-	-
SAMEA104347899	2015	United Kingdom	2015-11_37	fifer2018	PRJEB23008	ERR2172295	SAMEA104347899	No data	S	No data	I	No data	R	No data	S	No data	S	No data	S	No data	I	13377	7759	29	1580	126	39	67	111	148	153	133	192	2.001	25	3	100	100	100	1	-	23S_rDNA_a2045g	-	-	-	rpsJ_V57M	-	-	-
SAMEA104347900	2015	United Kingdom	2015-12_38	fifer2018	PRJEB23008	ERR2172303	SAMEA104347900	No data	S	No data	I	No data	R	No data	S	No data	S	No data	S	No data	I	9768	5759	29	1580	126	39	67	111	148	153	133	1996	2.001	25	42	100	100	100	1	-	23S_rDNA_a2045g	-	-	-	rpsJ_V57M	-	-	-
SAMEA104347901	2015	United Kingdom	2015-12_39	fifer2018	PRJEB23008	ERR2172318	SAMEA104347901	No data	S	No data	I	No data	R	No data	S	No data	S	No data	S	No data	I	13377	7759	29	1580	126	39	67	111	148	153	133	192	2.001	25	3	100	100	100	1	-	23S_rDNA_a2045g	-	-	-	rpsJ_V57M	-	-	-
SAMEA104347902	2015	United Kingdom	2015-12_40	fifer2018	PRJEB23008	ERR2172335	SAMEA104347902	No data	S	No data	I	No data	R	No data	S	No data	S	No data	S	No data	I	9768	5759	29	1580	126	39	67	111	148	153	133	1996	2.001	25	42	100	100	100	1	-	23S_rDNA_a2045g	-	-	-	rpsJ_V57M	-	-	-
SAMEA104347903	2016	United Kingdom	2016-02_41	fifer2018	PRJEB23008	ERR2172350	SAMEA104347903	No data	S	No data	I	No data	R	No data	S	No data	S	No data	S	No data	I	9768	5759	29	1580	126	39	67	111	148	153	133	1996	2.001	25	42	100	100	100	1	-	23S_rDNA_a2045g	-	-	-	rpsJ_V57M	-	-	-
SAMEA104347904	2015	Scotland	2015-02_42	fifer2018	PRJEB23008	ERR2172320	SAMEA104347904	No data	S	No data	I	No data	R	No data	S	No data	S	No data	S	No data	I	2475	1527	29	1580	126	39	67	111	148	153	133	192	2.001	25	3	100	100	100	1	-	23S_rDNA_a2045g	-	-	-	rpsJ_V57M	-	-	-
SAMEA104347905	2015	Scotland	2015-12_43	fifer2018	PRJEB23008	ERR2172333	SAMEA104347905	No data	S	No data	I	No data	R	No data	S	No data	S	No data	S	No data	I	2475	1527	29	1580	126	39	67	111	148	153	133	192	2.001	25	3	100	100	100	1	-	23S_rDNA_a2045g	-	-	-	rpsJ_V57M	-	-	-
SAMEA104347906	2016	Scotland	2016-01_44	fifer2018	PRJEB23008	ERR2172257	SAMEA104347906	No data	S	No data	I	No data	R	No data	S	No data	S	No data	S	No data	I	649	442	29	1580	126	39	67	111	148	153	133	192	2.001	25	3	100	100	100	1	-	23S_rDNA_a2045g	-	-	-	rpsJ_V57M	-	-	-
SAMEA104347907	2016	United Kingdom	2016-02_45	fifer2018	PRJEB23008	ERR2172336	SAMEA104347907	No data	S	No data	I	No data	R	No data	S	No data	S	No data	S	No data	I	9768	5759	29	1580	126	39	67	111	148	153	133	1996	2.001	25	42	100	100	100	1	-	23S_rDNA_a2045g	-	-	-	rpsJ_V57M	-	-	-
SAMEA104347908	2016	United Kingdom	2016-02_46	fifer2018	PRJEB23008	ERR2172254	SAMEA104347908	No data	S	No data	I	No data	R	No data	S	No data	S	No data	S	No data	I	9768	5759	29	1580	126	39	67	111	148	153	133	1996	2.001	25	42	100	100	100	1	-	23S_rDNA_a2045g	-	-	-	rpsJ_V57M	-	-	-
SAMEA104347909	2016	United Kingdom	2016-02_47	fifer2018	PRJEB23008	ERR2172310	SAMEA104347909	No data	S	No data	I	No data	R	No data	S	No data	S	No data	S	No data	I	13986	8068	29	1580	126	39	67	111	148	153	133	1038	93.001	25	3	100	100	100	2	-	-	23S_rDNA_c2597t	-	-	rpsJ_V57M	-	-	-
SAMEA104347910	2016	United Kingdom	2016-02_48	fifer2018	PRJEB23008	ERR2172259	SAMEA104347910	No data	S	No data	I	No data	R	No data	S	No data	S	No data	S	No data	I	13987	8069	29	1580	126	39	67	111	148	153	133	new	93.001	new	3	100	100	100	2	-	-	23S_rDNA_c2597t	-	-	rpsJ_V57M	-	-	-
SAMEA104347911	2016	United Kingdom	2016-03_49	fifer2018	PRJEB23008	ERR2172290	SAMEA104347911	No data	S	No data	I	No data	R	No data	S	No data	S	No data	S	No data	I	9768	5759	29	1580	126	39	67	111	148	153	133	1996	2.001	25	42	100	100	100	1	-	23S_rDNA_a2045g	-	-	-	rpsJ_V57M	-	-	-
SAMEA104347912	2016	United Kingdom	2016-03_50	fifer2018	PRJEB23008	ERR2172352	SAMEA104347912	No data	S	No data	I	No data	R	No data	S	No data	S	No data	S	No data	I	9768	5759	29	1580	126	39	67	111	148	153	133	1996	2.001	25	42	100	100	100	1	-	23S_rDNA_a2045g	-	-	-	rpsJ_V57M	-	-	-
SAMEA104347913	2016	United Kingdom	2016-03_51	fifer2018	PRJEB23008	ERR2172283	SAMEA104347913	No data	S	No data	I	No data	R	No data	S	No data	S	No data	S	No data	I	9768	5759	29	1580	126	39	67	111	148	153	133	1996	2.001	25	42	100	100	100	1	-	23S_rDNA_a2045g	-	-	-	rpsJ_V57M	-	-	-
SAMEA104347914	2016	United Kingdom	2016-03_52	fifer2018	PRJEB23008	ERR2172332	SAMEA104347914	No data	S	No data	I	No data	R	No data	S	No data	S	No data	S	No data	I	9768	5759	29	1580	126	39	67	111	148	153	133	1996	2.001	25	42	100	100	100	1	-	23S_rDNA_a2045g	-	-	-	rpsJ_V57M	-	-	-
SAMEA104347915	2016	United Kingdom	2016-03_53	fifer2018	PRJEB23008	ERR2172347	SAMEA104347915	No data	S	No data	I	No data	R	No data	S	No data	S	No data	S	No data	I	9768	5759	29	1580	126	39	67	111	148	153	133	1996	2.001	25	42	100	100	100	1	-	23S_rDNA_a2045g	-	-	-	rpsJ_V57M	-	-	-
SAMEA104347916	2016	United Kingdom	2016-03_54	fifer2018	PRJEB23008	ERR2172339	SAMEA104347916	No data	S	No data	I	No data	R	No data	S	No data	S	No data	S	No data	I	797	533	29	1580	126	39	67	111	148	153	133	new	2.001	25	3	new	100	100	1	-	23S_rDNA_a2045g	-	-	-	rpsJ_V57M	-	-	-
SAMEA104347917	2016	United Kingdom	2016-03_55	fifer2018	PRJEB23008	ERR2172341	SAMEA104347917	No data	S	No data	I	No data	R	No data	S	No data	S	No data	S	No data	I	2475	1527	29	1580	126	39	67	111	148	153	133	192	2.001	25	3	100	100	100	1	-	23S_rDNA_a2045g	-	-	-	rpsJ_V57M	-	-	-
SAMEA104347918	2016	United Kingdom	2016-04_56	fifer2018	PRJEB23008	ERR2172329	SAMEA104347918	No data	S	No data	I	No data	R	No data	S	No data	S	No data	S	No data	I	2475	1527	29	1580	126	39	67	111	148	153	133	192	2.001	25	3	100	100	100	1	-	23S_rDNA_a2045g	-	-	-	rpsJ_V57M	-	-	-
SAMEA104347919	2016	United Kingdom	2016-04_57	fifer2018	PRJEB23008	ERR2172302	SAMEA104347919	No data	S	No data	I	No data	R	No data	S	No data	S	No data	S	No data	I	649	442	29	1580	126	39	67	111	148	153	133	192	2.001	25	3	100	100	100	1	-	23S_rDNA_a2045g	-	-	-	rpsJ_V57M	-	-	-
SAMEA104347921	2016	United Kingdom	2016-06_59	fifer2018	PRJEB23008	ERR2172309	SAMEA104347921	No data	S	No data	I	No data	R	No data	S	No data	S	No data	S	No data	I	9768	5759	29	1580	126	39	67	111	148	153	133	1996	2.001	25	42	100	100	100	1	-	23S_rDNA_a2045g	-	-	-	rpsJ_V57M	-	-	-
SAMEA104347922	2016	United Kingdom	2016-06_60	fifer2018	PRJEB23008	ERR2172312	SAMEA104347922	No data	S	No data	I	No data	R	No data	S	No data	S	No data	S	No data	I	14308	8289	29	1580	126	39	67	111	148	153	133	1996	2.001	25	42	100	100	100	1	-	23S_rDNA_a2045g	-	-	-	rpsJ_V57M	-	-	-
SAMEA104347923	2014	Scotland	2014-04_61	fifer2018	PRJEB23008	ERR2172342	SAMEA104347923	No data	S	No data	I	No data	S	No data	S	No data	S	No data	S	No data	I	9768	5759	29	1580	126	39	67	111	148	153	133	new	2.001	25	42	100	100	100	100	-	-	-	-	-	rpsJ_V57M	-	-	-
SAMEA104347924	2014	Scotland	2014-04_62	fifer2018	PRJEB23008	ERR2172345	SAMEA104347924	No data	S	No data	I	No data	S	No data	S	No data	S	No data	S	No data	I	9768	5759	29	1580	126	39	67	111	148	153	133	new	2.001	25	42	100	100	100	100	-	-	-	-	-	rpsJ_V57M	-	-	-
SAMEA104347925	2014	Scotland	2014-04_63	fifer2018	PRJEB23008	ERR2172354	SAMEA104347925	No data	S	No data	I	No data	S	No data	S	No data	S	No data	S	No data	I	9768	5759	29	1580	126	39	67	111	148	153	133	new	2.001	25	42	100	100	100	100	-	-	-	-	-	rpsJ_V57M	-	-	-
SAMEA104347926	2014	Scotland	2014-06_64	fifer2018	PRJEB23008	ERR2172307	SAMEA104347926	No data	S	No data	I	No data	S	No data	S	No data	S	No data	S	No data	I	9768	5759	29	1580	126	39	67	111	148	153	133	new	2.001	25	42	100	100	100	100	-	-	-	-	-	rpsJ_V57M	-	-	-
SAMEA104347927	2014	Scotland	2014-06_65	fifer2018	PRJEB23008	ERR2172311	SAMEA104347927	No data	S	No data	I	No data	S	No data	S	No data	S	No data	S	No data	I	9768	5759	29	1580	126	39	67	111	148	153	133	new	2.001	25	42	100	100	100	100	-	-	-	-	-	rpsJ_V57M	-	-	-
SAMEA104347928	2014	Scotland	2014-08_66	fifer2018	PRJEB23008	ERR2172346	SAMEA104347928	No data	S	No data	I	No data	S	No data	S	No data	S	No data	S	No data	I	9768	5759	29	1580	126	39	67	111	148	153	133	new	2.001	25	42	100	100	100	new	-	-	-	-	-	rpsJ_V57M	-	-	-
SAMEA104347929	2014	Scotland	2014-10_67	fifer2018	PRJEB23008	ERR2172255	SAMEA104347929	No data	S	No data	I	No data	S	No data	S	No data	S	No data	S	No data	I	9768	5759	29	1580	126	39	67	111	148	153	133	new	2.001	25	42	100	100	100	100	-	-	-	-	-	rpsJ_V57M	-	-	-
SAMEA104347930	2014	Scotland	2014-10_68	fifer2018	PRJEB23008	ERR2172324	SAMEA104347930	No data	S	No data	I	No data	R	No data	S	No data	S	No data	S	No data	I	9768	5759	29	1580	126	39	67	111	148	153	133	1996	2.001	25	42	100	100	100	1	-	23S_rDNA_a2045g	-	-	-	rpsJ_V57M	-	-	-
SAMEA104347931	2014	Scotland	2014-10_69	fifer2018	PRJEB23008	ERR2172284	SAMEA104347931	No data	S	No data	I	No data	R	No data	S	No data	S	No data	S	No data	I	9768	5759	29	1580	126	39	67	111	148	153	133	1996	2.001	25	42	100	100	100	1	-	23S_rDNA_a2045g	-	-	-	rpsJ_V57M	-	-	-
SAMEA104347932	2015	Scotland	2015-06_70	fifer2018	PRJEB23008	ERR2172326	SAMEA104347932	No data	S	No data	I	No data	R	No data	S	No data	S	No data	S	No data	I	9768	5759	29	1580	126	39	67	111	148	153	133	1996	2.001	25	42	100	100	100	1	-	23S_rDNA_a2045g	-	-	-	rpsJ_V57M	-	-	-
SAMEA104347935	2016	Scotland	2016-02_73	fifer2018	PRJEB23008	ERR2172301	SAMEA104347935	No data	S	No data	I	No data	S	No data	S	No data	S	No data	S	No data	I	9768	5759	29	1580	126	39	67	111	148	153	133	new	2.001	25	42	100	100	100	100	-	-	-	-	-	rpsJ_V57M	-	-	-
SAMEA104347936	2016	United Kingdom	2016-07_74	fifer2018	PRJEB23008	ERR2172298	SAMEA104347936	No data	S	No data	I	No data	R	No data	S	No data	S	No data	S	No data	I	9768	5759	29	1580	126	39	67	111	148	153	133	1996	2.001	25	42	100	100	100	1	-	23S_rDNA_a2045g	-	-	-	rpsJ_V57M	-	-	-
SAMEA104347937	2016	United Kingdom	2016-07_75	fifer2018	PRJEB23008	ERR2172291	SAMEA104347937	No data	S	No data	I	No data	R	No data	S	No data	S	No data	S	No data	I	9768	5759	29	1580	126	39	67	111	148	153	133	1996	2.001	25	42	100	100	100	1	-	23S_rDNA_a2045g	-	-	-	rpsJ_V57M	-	-	-
SAMEA104347938	2016	United Kingdom	2016-07_76	fifer2018	PRJEB23008	ERR2172288	SAMEA104347938	No data	S	No data	I	No data	R	No data	S	No data	S	No data	S	No data	I	9768	5759	29	1580	126	39	67	111	148	153	133	1996	2.001	25	42	100	100	100	1	-	23S_rDNA_a2045g	-	-	-	rpsJ_V57M	-	-	-
SAMEA104347939	2016	United Kingdom	2016-08_77	fifer2018	PRJEB23008	ERR2172285	SAMEA104347939	No data	S	No data	I	No data	R	No data	S	No data	S	No data	S	No data	I	649	442	29	1580	126	39	67	111	148	153	133	192	2.001	25	3	100	100	100	1	-	23S_rDNA_a2045g	-	-	-	rpsJ_V57M	-	-	-
SAMEA104347941	2016	United Kingdom	2016-08_79	fifer2018	PRJEB23008	ERR2172268	SAMEA104347941	No data	S	No data	I	No data	R	No data	S	No data	S	No data	S	No data	I	649	442	29	1580	126	39	67	111	148	153	133	192	2.001	25	3	100	100	100	1	-	23S_rDNA_a2045g	-	-	-	rpsJ_V57M	-	-	-
SAMEA104347943	2016	United Kingdom	2016-10_81	fifer2018	PRJEB23008	ERR2172351	SAMEA104347943	No data	S	No data	I	No data	R	No data	S	No data	S	No data	S	No data	I	14308	8289	29	1580	126	39	67	111	148	153	133	1996	2.001	25	42	100	100	100	1	-	23S_rDNA_a2045g	-	-	-	rpsJ_V57M	-	-	-
SAMEA104347944	2016	United Kingdom	2016-10_82	fifer2018	PRJEB23008	ERR2172273	SAMEA104347944	No data	S	No data	I	No data	R	No data	S	No data	S	No data	S	No data	I	9768	5759	29	1580	126	39	67	111	148	153	133	1996	2.001	25	42	100	100	100	1	-	23S_rDNA_a2045g	-	-	-	rpsJ_V57M	-	-	-
SAMEA104347945	2016	United Kingdom	2016-10_83	fifer2018	PRJEB23008	ERR2172325	SAMEA104347945	No data	S	No data	I	No data	R	No data	S	No data	S	No data	S	No data	I	9768	5759	29	1580	126	39	67	111	148	153	133	1996	2.001	25	42	100	100	100	1	-	23S_rDNA_a2045g	-	-	-	rpsJ_V57M	-	-	-
SAMEA104347946	2016	United Kingdom	2016-11_84	fifer2018	PRJEB23008	ERR2172272	SAMEA104347946	No data	S	No data	I	No data	R	No data	S	No data	S	No data	S	No data	I	14308	8289	29	1580	126	39	67	111	148	153	133	1996	2.001	25	42	100	100	100	1	-	23S_rDNA_a2045g	-	-	-	rpsJ_V57M	-	-	-
SAMEA104347947	2017	United Kingdom	2017-01_85	fifer2018	PRJEB23008	ERR2172269	SAMEA104347947	No data	S	No data	I	No data	R	No data	S	No data	S	No data	S	No data	I	649	442	29	1580	126	39	67	111	148	153	133	new	2.001	25	3	new	100	100	1	-	23S_rDNA_a2045g	-	-	-	rpsJ_V57M	-	-	-
SAMEA104347948	2017	United Kingdom	2017-02_86	fifer2018	PRJEB23008	ERR2172343	SAMEA104347948	No data	S	No data	I	No data	R	No data	S	No data	S	No data	S	No data	I	649	442	29	16470	126	882	67	111	148	153	133	192	2.001	25	3	100	100	100	1	-	23S_rDNA_a2045g	-	-	-	rpsJ_V57M	-	-	-
SAMEA104347949	2017	United Kingdom	2017-02_87	fifer2018	PRJEB23008	ERR2172316	SAMEA104347949	No data	S	No data	I	No data	R	No data	S	No data	S	No data	S	No data	I	649	442	29	1580	126	39	67	111	148	153	133	192	2.001	25	3	100	100	100	1	-	23S_rDNA_a2045g	-	-	-	rpsJ_V57M	-	-	-
SAMEA104347950	2017	United Kingdom	2017-02_88	fifer2018	PRJEB23008	ERR2172279	SAMEA104347950	No data	S	No data	I	No data	R	No data	S	No data	S	No data	S	No data	I	649	442	29	1580	126	39	67	111	148	153	133	192	2.001	25	3	100	100	100	1	-	23S_rDNA_a2045g	-	-	-	rpsJ_V57M	-	-	-
SAMEA104347951	2017	United Kingdom	2017-02_89	fifer2018	PRJEB23008	ERR2172348	SAMEA104347951	No data	S	No data	I	No data	R	No data	S	No data	S	No data	S	No data	I	9768	5759	29	1580	126	39	67	111	148	153	133	1996	2.001	25	42	100	100	100	1	-	23S_rDNA_a2045g	-	-	-	rpsJ_V57M	-	-	-
SAMEA104347952	2017	United Kingdom	2017-02_90	fifer2018	PRJEB23008	ERR2172260	SAMEA104347952	No data	S	No data	I	No data	R	No data	S	No data	S	No data	S	No data	I	649	442	29	1580	126	39	67	111	148	153	133	new	2.001	25	3	new	100	100	1	-	23S_rDNA_a2045g	-	-	-	rpsJ_V57M	-	-	-
SAMEA104347953	2017	United Kingdom	2017-02_91	fifer2018	PRJEB23008	ERR2172308	SAMEA104347953	No data	S	No data	I	No data	R	No data	S	No data	S	No data	S	No data	I	13565	442	322	1580	126	39	67	111	148	153	133	192	2.001	25	3	100	100	100	1	-	23S_rDNA_a2045g	-	-	-	rpsJ_V57M	-	-	-
SAMEA104347954	2017	United Kingdom	2017-02_92	fifer2018	PRJEB23008	ERR2172270	SAMEA104347954	No data	S	No data	I	No data	R	No data	S	No data	S	No data	S	No data	I	9768	5759	29	1580	126	39	67	111	148	153	133	1996	2.001	25	42	100	100	100	1	-	23S_rDNA_a2045g	-	-	-	rpsJ_V57M	-	-	-
SAMEA104347955	2007	United Kingdom	2007-07_93	fifer2018	PRJEB23008	ERR2172292	SAMEA104347955	No data	S	No data	I	No data	R	No data	S	No data	S	No data	S	No data	I	649	442	29	1580	126	39	67	111	148	153	133	192	2.001	25	3	100	100	100	1	-	23S_rDNA_a2045g	-	-	-	rpsJ_V57M	-	-	-
SAMEA104347956	2007	United Kingdom	2007-07_94	fifer2018	PRJEB23008	ERR2172327	SAMEA104347956	No data	S	No data	I	No data	R	No data	S	No data	S	No data	S	No data	I	649	442	29	1580	126	39	67	111	148	153	133	192	2.001	25	3	100	100	100	1	-	23S_rDNA_a2045g	-	-	-	rpsJ_V57M	-	-	-
SAMEA104347957	2007	United Kingdom	2007-08_95	fifer2018	PRJEB23008	ERR2172315	SAMEA104347957	No data	S	No data	I	No data	R	No data	S	No data	S	No data	S	No data	I	649	442	29	1580	126	39	67	111	148	153	133	192	2.001	25	3	100	100	100	1	-	23S_rDNA_a2045g	-	-	-	rpsJ_V57M	-	-	-
SAMEA104347958	2007	United Kingdom	2007-08_96	fifer2018	PRJEB23008	ERR2172322	SAMEA104347958	No data	S	No data	I	No data	R	No data	S	No data	S	No data	S	No data	I	649	442	29	1580	126	39	67	111	148	153	133	192	2.001	25	3	100	100	100	1	-	23S_rDNA_a2045g	-	-	-	rpsJ_V57M	-	-	-
SAMEA104347959	2007	United Kingdom	2007-06_97	fifer2018	PRJEB23008	ERR2172289	SAMEA104347959	No data	S	No data	I	No data	R	No data	S	No data	S	No data	S	No data	I	649	442	29	1580	126	39	67	111	148	153	133	192	2.001	25	3	100	100	100	1	-	23S_rDNA_a2045g	-	-	-	rpsJ_V57M	-	-	-
SAMEA104347960	2012	United Kingdom	2012-07_98	fifer2018	PRJEB23008	ERR2172263	SAMEA104347960	No data	S	No data	I	No data	R	No data	S	No data	S	No data	S	No data	I	2963	1790	29	1580	126	39	67	111	148	153	133	192	2.001	25	3	100	100	100	1	-	23S_rDNA_a2045g	-	-	-	rpsJ_V57M	-	-	-
SAMEA104347961	2012	United Kingdom	2012-09_99	fifer2018	PRJEB23008	ERR2172297	SAMEA104347961	No data	S	No data	I	No data	R	No data	S	No data	S	No data	S	No data	I	2963	1790	29	1580	126	39	67	111	148	153	133	192	2.001	25	3	100	100	100	1	-	23S_rDNA_a2045g	-	-	-	rpsJ_V57M	-	-	-
SAMEA104347962	2013	United Kingdom	2013-08_100	fifer2018	PRJEB23008	ERR2172256	SAMEA104347962	No data	S	No data	I	No data	R	No data	S	No data	S	No data	S	No data	I	649	442	29	1580	126	39	67	111	148	153	133	192	2.001	25	3	100	100	100	1	-	23S_rDNA_a2045g	-	-	-	rpsJ_V57M	-	-	-
SAMEA104347963	2015	United Kingdom	2015-07_101	fifer2018	PRJEB23008	ERR2172353	SAMEA104347963	No data	S	No data	I	No data	S	No data	S	No data	S	No data	S	No data	I	2475	1527	29	1580	126	39	67	111	148	153	133	new	2.001	25	3	100	100	100	new	-	-	-	-	-	rpsJ_V57M	-	-	-
SAMEA1677297	2009	United States	GCGS216	grad2014, grad2016	PRJEB2090	ERR222915	SAMEA1677297	1	S	16	R	0.25	S	0.015	S	0.015	S	2	R	4	R	3307	30	743	1588	59	39	67	158	148	71	65	249	19.001	38	1	1	7	3	100	-	-	-	blaTEM	tetM	rpsJ_V57M	-	-	-
SAMEA1677312	2009	United States	GCGS210	grad2014, grad2016	PRJEB2090	ERR222909	SAMEA1677312	1	S	16	R	0.25	S	0.03	S	0.015	S	1	R	0.5	I	3307	30	743	1588	59	39	67	158	148	71	65	53	19.001	38	1	1	7	15	100	-	-	-	-	tetM	rpsJ_V57M	-	-	-
SAMEA1677318	2009	United States	GCGS212	grad2014, grad2016	PRJEB2090	ERR222911	SAMEA1677318	1	S	32	R	0.25	S	0.03	S	0.015	S	1	R	1	I	4405	28	743	1588	59	39	67	158	148	71	65	248	19.001	38	3	1	7	15	100	-	-	-	-	tetM	rpsJ_V57M	-	-	-
SAMEA1677404	2009	United States	GCGS198	grad2014, grad2016	PRJEB2090	ERR222897	SAMEA1677404	1	S	1	I	16	R	0.015	S	0.008	S	0.015	S	0.25	I	4198	2577	29	9363	126	39	67	238	148	153	133	64	2.001	9	1	100	100	100	2	-	-	23S_rDNA_c2597t	-	-	rpsJ_V57M	-	-	-
SAMEA1677409	2009	United States	GCGS208	grad2014, grad2016	PRJEB2090	ERR222907	SAMEA1677409	1	S	2	R	1	S	0.015	S	0.015	S	8	R	1	I	new	new	21	1582	59	39	170	78	148	154	65	186	2.002	19	8	100	1	18	100	-	-	-	-	-	rpsJ_V57M	-	porB1b_G120K	porB1b_A121D
SAMEA1677411	2009	United States	GCGS224	grad2014, grad2016	PRJEB2090	ERR222923	SAMEA1677411	1	S	1	I	8	R	0.015	S	0.008	S	0.015	S	0.25	I	4198	2577	29	9363	126	39	67	238	148	153	133	64	2.001	9	1	100	100	100	2	-	-	23S_rDNA_c2597t	-	-	rpsJ_V57M	-	-	-
SAMEA1677412	2009	United States	GCGS202	grad2014, grad2016	PRJEB2090	ERR222901	SAMEA1677412	1	S	0.5	I	8	R	0.03	S	0.008	S	0.015	S	0.25	I	4198	2577	29	9363	126	39	67	238	148	153	133	64	2.001	9	1	100	100	100	2	-	-	23S_rDNA_c2597t	-	-	rpsJ_V57M	-	-	-
SAMEA1677449	2009	United States	GCGS228	grad2014, grad2016	PRJEB2090	ERR222927	SAMEA1677449	1	S	4	R	2	S	0.015	S	0.015	S	0.015	S	2	I	new	new	29	9363	126	39	67	238	148	153	133	new	2.001	2	8	100	100	100	new	-	-	-	-	-	rpsJ_V57M	-	porB1b_G120K	porB1b_A121D
SAMEA1677478	2010	United States	GCGS204	grad2014, grad2016	PRJEB2090	ERR222903	SAMEA1677478	1	S	1	I	8	R	0.015	S	0.008	S	0.015	S	0.25	I	new	new	29	9363	126	39	67	238	148	153	133	64	2.001	9	1	100	100	100	2	-	-	23S_rDNA_c2597t	-	-	rpsJ_V57M	-	-	-
SAMEA1690314	2009	United States	GCGS186	grad2014, grad2016	PRJEB2999	ERR223692	SAMEA1690314	1	S	64	R	0.25	S	0.03	S	0.03	S	2	R	8	R	new	997	743	1588	59	39	67	158	148	71	65	247	19.001	38	12	1	7	15	100	-	-	-	blaTEM	tetM	rpsJ_V57M	-	porB1b_G120K	-
SAMEA1690327	2009	United States	GCGS038	grad2014, grad2016	PRJEB2999	ERR191767	SAMEA1690327	1	S	1	I	8	R	0.015	S	0.008	S	0.015	S	0.5	I	2992	1808	29	9363	126	39	67	238	148	153	133	549	2.001	56	1	100	100	100	2	-	-	23S_rDNA_c2597t	-	-	rpsJ_V57M	-	-	-
SAMEA1690331	2010	United States	GCGS096	grad2014, grad2016	PRJEB2999	ERR191825	SAMEA1690331	1	S	1	I	16	R	0.03	S	0.008	S	0.015	S	0.5	I	2992	1808	29	9363	126	39	67	238	148	153	133	64	2.001	9	1	100	100	100	2	-	-	23S_rDNA_c2597t	-	-	rpsJ_V57M	-	-	-
SAMEA1690332	2010	United States	GCGS126	grad2014, grad2016	PRJEB2999	ERR223632	SAMEA1690332	1	S	0.5	I	0.25	S	0.06	R	0.03	S	0.015	S	0.5	I	2992	1808	29	9363	126	39	67	238	148	153	133	2001	67.001	9	1	100	100	100	100	-	-	-	-	-	rpsJ_V57M	-	-	-
SAMEA1690342	2010	United States	GCGS110	grad2014, grad2016	PRJEB2999	ERR223616	SAMEA1690342	1	S	1	I	16	R	0.03	S	0.008	S	0.015	S	0.25	I	2992	1808	29	9363	126	39	67	238	148	153	133	2002	2.007	9	1	100	100	100	2	-	-	23S_rDNA_c2597t	-	-	rpsJ_V57M	-	-	-
SAMEA1690347	2010	United States	GCGS192	grad2014, grad2016	PRJEB2999	ERR223698	SAMEA1690347	1	S	1	R	2	S	0.03	S	0.008	S	0.015	S	0.5	I	2992	1808	29	9363	126	39	67	238	148	153	133	246	2.001	1	1	100	100	100	100	-	-	-	-	-	rpsJ_V57M	-	-	-
SAMEA1690356	2009	United States	GCGS008	grad2014, grad2016	PRJEB2999	ERR191737	SAMEA1690356	1	S	16	R	0.25	S	0.015	S	0.008	S	1	R	0.5	I	new	3403	743	1588	59	39	67	158	148	71	65	553	19.001	161	100	1	7	15	100	-	-	-	-	tetM	rpsJ_V57M	-	-	-
SAMEA1690359	2009	United States	GCGS112	grad2016	PRJEB2999	ERR355927	SAMEA1690359	No data	S	No data	R	0.25	S	0.015	S	0.015	S	4	R	No data	I	new	581	35	10310	59	39	170	78	666	154	65	186	2.002	19	8	100	1	18	100	-	-	-	-	-	rpsJ_V57M	-	porB1b_G120K	porB1b_A121D
SAMEA1690362	2009	United States	GCGS084	grad2014, grad2016	PRJEB2999	ERR191813	SAMEA1690362	1	S	4	R	1	S	0.015	S	0.015	S	0.015	S	2	R	3935	908	29	9363	126	39	67	238	148	153	133	242	2.001	1	11	100	100	100	100	-	-	-	-	-	rpsJ_V57M	-	porB1b_G120K	-
SAMEA1690363	2009	United States	GCGS064	grad2014, grad2016	PRJEB2999	ERR191793	SAMEA1690363	1	S	32	R	1	S	0.06	S	0.03	S	0.015	S	4	I	437	14	4	1893	59	39	67	157	147	153	133	552	9.001	58	8	1	100	2	100	-	-	-	-	tetM	rpsJ_V57M	rplD_G70D	porB1b_G120K	porB1b_A121D
SAMEA1690366	2009	United States	GCGS040	grad2014, grad2016	PRJEB2999	ERR191769	SAMEA1690366	1	S	16	R	0.125	S	0.03	S	0.03	S	16	R	16	R	1288	543	29	7823	435	39	170	111	148	153	65	557	43.002	1	12	1	7	24	100	-	-	-	blaTEM	tetM	rpsJ_V57M	-	porB1b_G120K	-
SAMEA1690370	2010	United States	GCGS128	grad2014, grad2016	PRJEB2999	ERR223634	SAMEA1690370	1	S	0.5	I	8	R	0.03	S	0.008	S	0.015	S	0.25	I	2992	1808	29	9363	126	39	67	238	148	153	133	549	2.001	56	1	100	100	100	2	-	-	23S_rDNA_c2597t	-	-	rpsJ_V57M	-	-	-
SAMEA1690376	2009	United States	GCGS082	grad2014, grad2016	PRJEB2999	ERR191811	SAMEA1690376	1	S	2	R	0.25	S	0.06	S	0.06	S	16	R	2	R	3449	1053	107	10313	109	39	170	158	148	668	65	554	18.001	59	8	1	7	3	100	-	-	-	-	-	rpsJ_V57M	-	porB1b_G120K	porB1b_A121D
SAMEA1690379	2009	United States	GCGS009	grad2014, grad2016	PRJEB2999	ERR191738	SAMEA1690379	1	S	2	I	0.25	S	0.063	S	0.032	S	0.004	S	1	I	359	301	29	8126	126	39	67	78	148	153	133	543	66.001	25	3	100	100	100	100	-	-	-	-	-	rpsJ_V57M	-	-	-
SAMEA1690383	2010	United States	GCGS136	grad2014, grad2016	PRJEB2999	ERR223642	SAMEA1690383	1	S	1	I	8	R	0.03	S	0.008	S	0.015	S	0.25	I	new	new	29	9363	126	39	67	238	148	153	133	549	2.001	56	1	100	100	100	2	-	-	23S_rDNA_c2597t	-	-	rpsJ_V57M	-	-	-
SAMEA1690385	2009	United States	GCGS083	grad2014, grad2016	PRJEB2999	ERR191812	SAMEA1690385	1	S	2	R	0.5	S	0.032	S	0.032	S	0.008	S	2	R	3935	908	29	9363	126	39	67	238	148	153	133	242	2.001	1	11	100	100	100	100	-	-	-	-	-	rpsJ_V57M	-	porB1b_G120K	-
SAMEA1690389	2010	United States	GCGS174	grad2014, grad2016	PRJEB2999	ERR223680	SAMEA1690389	1	S	1	I	16	R	0.03	S	0.008	S	0.015	S	0.25	I	2992	1808	29	9363	126	39	67	238	148	153	133	64	2.001	9	1	100	100	100	2	-	-	23S_rDNA_c2597t	-	-	rpsJ_V57M	-	-	-
SAMEA1690395	2009	United States	GCGS062	grad2014, grad2016	PRJEB2999	ERR191791	SAMEA1690395	1	S	1	I	0.25	S	0.015	S	0.015	S	4	R	0.5	I	730	59	29	1580	126	39	67	111	148	153	133	241	2.001	9	3	100	1	3	100	-	-	-	-	-	rpsJ_V57M	-	-	-
SAMEA1690403	2010	United States	GCGS156	grad2014, grad2016	PRJEB2999	ERR223662	SAMEA1690403	1	S	1	I	16	S	0.03	S	0.008	S	0.015	S	0.25	I	9247	5505	29	9363	126	39	67	238	148	153	133	64	2.001	9	1	100	100	100	2	-	-	-	-	-	rpsJ_V57M	-	-	-
SAMEA1690407	2009	United States	GCGS146	grad2014, grad2016	PRJEB2999	ERR223652	SAMEA1690407	1	S	16	R	0.25	S	0.03	S	0.008	S	1	R	4	R	3307	30	743	1588	59	39	67	158	148	71	65	53	19.001	38	1	1	7	15	100	-	-	-	blaTEM	tetM	rpsJ_V57M	-	-	-
SAMEA1690409	2010	United States	GCGS138	grad2014, grad2016	PRJEB2999	ERR223644	SAMEA1690409	1	S	1	I	16	R	0.015	S	0.008	S	0.015	S	0.25	I	2992	1808	29	9363	126	39	67	238	148	153	133	549	2.001	56	1	100	100	100	2	-	-	23S_rDNA_c2597t	-	-	rpsJ_V57M	-	-	-
SAMEA1690427	2010	United States	GCGS098	grad2014, grad2016	PRJEB2999	ERR223604	SAMEA1690427	1	S	1	I	16	R	0.03	S	0.008	S	0.015	S	0.25	I	2992	1808	29	9363	126	39	67	238	148	153	133	64	2.001	9	1	100	100	100	2	-	-	23S_rDNA_c2597t	-	-	rpsJ_V57M	-	-	-
SAMEA1690431	2009	United States	GCGS024	grad2014, grad2016	PRJEB2999	ERR191753	SAMEA1690431	1	S	16	R	0.5	S	0.06	S	0.06	S	4	R	16	R	1405	543	110	7823	435	39	170	111	148	153	65	1575	43.003	1	12	1	7	6	100	-	-	-	blaTEM	tetM	rpsJ_V57M	-	porB1b_G120K	-
SAMEA1690451	2009	United States	GCGS090	grad2014, grad2016	PRJEB2999	ERR191819	SAMEA1690451	1	S	32	R	0.25	S	0.015	S	0.008	S	1	R	8	R	4205	2583	743	1588	59	39	67	158	148	71	65	53	19.001	38	1	1	7	15	100	-	-	-	blaTEM	tetM	rpsJ_V57M	-	-	-
SAMEA1690456	2009	United States	GCGS060	grad2014, grad2016	PRJEB2999	ERR191789	SAMEA1690456	1	S	2	R	0.5	S	0.06	S	0.06	S	8	R	4	I	9164	2329	4	1901	109	39	170	111	148	153	65	177	12.004	1	8	1	1	3	100	-	-	-	-	-	rpsJ_V57M	-	porB1b_G120K	porB1b_A121D
SAMEA1690465	2009	United States	GCGS120	grad2014, grad2016	PRJEB2999	ERR223626	SAMEA1690465	1	S	0.5	I	8	R	0.015	S	0.008	S	0.015	S	0.25	I	4198	2577	29	9363	126	39	67	238	148	153	133	64	2.001	9	1	100	100	100	2	-	-	23S_rDNA_c2597t	-	-	rpsJ_V57M	-	-	-
SAMEA1690468	2009	United States	GCGS010	grad2014, grad2016	PRJEB2999	ERR191739	SAMEA1690468	1	S	0.5	I	0.5	S	0.015	S	0.015	S	0.015	S	0.25	I	new	new	29	1580	126	39	67	111	148	153	133	240	2.001	25	1	100	100	100	100	-	-	-	-	-	rpsJ_V57M	-	-	-
SAMEA1690486	2010	United States	GCGS092	grad2014, grad2016	PRJEB2999	ERR191821	SAMEA1690486	1	S	1	I	0.25	S	0.06	S	0.06	S	0.015	S	1	I	730	59	29	1580	126	39	67	111	148	153	133	245	2.001	9	3	1	100	100	100	-	-	-	-	-	rpsJ_V57M	-	-	-
SAMEA1690498	2009	United States	GCGS074	grad2014, grad2016	PRJEB2999	ERR191803	SAMEA1690498	1	S	0.5	R	0.25	S	0.015	S	0.008	S	0.015	S	0.5	I	766	35	18	1583	59	39	67	111	148	153	65	550	2.001	1	100	6	100	2	100	-	-	-	-	-	rpsJ_V57M	-	-	-
SAMEA1690499	2009	United States	GCGS188	grad2014, grad2016	PRJEB2999	ERR223694	SAMEA1690499	1	S	16	R	0.25	S	0.03	S	0.015	S	1	R	0.25	I	9271	1142	743	1588	59	39	67	158	148	71	65	53	19.001	38	1	1	7	15	100	-	-	-	-	tetM	rpsJ_V57M	-	-	-
SAMEA1690500	2009	United States	GCGS154	grad2014, grad2016	PRJEB2999	ERR223660	SAMEA1690500	1	S	16	R	0.5	S	0.015	S	0.008	S	4	R	32	R	758	90	29	8130	59	39	170	78	149	154	65	1567	2.002	223	13	100	1	22	100	-	-	-	blaTEM	tetM	rpsJ_V57M	-	-	-
SAMEA1690507	2009	United States	GCGS180	grad2014, grad2016	PRJEB2999	ERR223686	SAMEA1690507	1	S	16	R	0.25	S	0.015	S	0.015	S	2	R	1	I	new	5014	743	1588	59	39	67	158	148	71	65	247	19.001	38	12	1	7	15	100	-	-	-	-	tetM	rpsJ_V57M	-	porB1b_G120K	-
SAMEA1963754	1998	United Kingdom	10356_1_66	sanchezbuso2019	PRJEB4024	ERR349951	SAMEA1963754	<=64	S	2	R	0.19	S	0.016	S	0.006	S	0.25	R	24	R	1083	206	74	1583	59	39	67	111	148	153	65	575	2.001	1	8	100	3	28	100	-	-	-	blaTEM	-	rpsJ_V57M	-	porB1b_G120K	porB1b_A121D
SAMEA1965886	2009	Norway	10868_8_32	sanchezbuso2019	PRJEB4024	ERR388311	SAMEA1965886	<=64	S	128	R	0.25	S	0.016	S	0.012	S	32	R	0.5	I	5030	3047	1047	1588	59	39	67	158	148	71	65	333	19.001	9	12	1	7	15	100	-	-	-	-	tetM	rpsJ_V57M	-	porB1b_G120K	-
SAMEA1967591	2008	Thailand	10625_6_48	sanchezbuso2019	PRJEB4024	ERR363623	SAMEA1967591	<=64	S	48	R	0.125	S	0.016	S	0.004	S	2	R	32	R	3761	2267	555	1925	126	39	170	78	148	154	65	1569	2.002	225	12	100	1	4	100	-	-	-	blaTEM	tetM	rpsJ_V57M	-	porB1b_G120K	-
SAMEA1971333	1998	Thailand	10900_8_76	sanchezbuso2019	PRJEB4024	ERR388450	SAMEA1971333	<=64	S	24	R	0.094	S	0.016	S	0.004	S	0.064	R	0.5	I	new	90	new	1903	126	39	67	157	148	153	65	3	2.001	1	13	1	5	1	100	-	-	-	-	tetM	rpsJ_V57M	-	-	-
SAMEA2072157	1998	Cuba	10356_1_6	sanchezbuso2019	PRJEB4024	ERR349891	SAMEA2072157	<=64	S	12	R	0.047	S	0.016	S	0.002	S	0.002	S	0.25	I	new	106	1066	11184	109	39	67	78	148	153	133	290	2.001	5	13	100	100	100	100	-	-	-	-	tetM	rpsJ_V57M	-	-	-
SAMEA2072158	2008	Argentina	10356_1_9	sanchezbuso2019	PRJEB4024	ERR349894	SAMEA2072158	<=64	S	1	I	0.5	S	0.016	S	0.004	S	0.008	S	0.125	I	2992	1808	29	9363	126	39	67	238	148	153	133	63	2.001	9	1	100	100	100	100	-	-	-	-	-	rpsJ_V57M	-	-	-
SAMEA2072316	1998	Germany	10356_1_41	sanchezbuso2019	PRJEB4024	ERR349926	SAMEA2072316	<=64	S	1.5	R	0.047	S	0.016	S	0.023	S	0.008	S	3	R	12970	206	2219	11207	712	39	67	158	149	71	65	331	4.001	22	8	1	100	1	100	-	-	-	-	-	rpsJ_V57M	-	porB1b_G120K	porB1b_A121D
SAMEA2072317	1998	Greece	10356_1_44	sanchezbuso2019	PRJEB4024	ERR349929	SAMEA2072317	<=64	S	3	I	0.25	S	0.016	S	0.006	S	0.008	S	2	R	495	91	32	1902	109	39	170	158	148	153	65	585	12.001	66	8	1	100	7	100	-	-	-	-	-	rpsJ_V57M	-	porB1b_G120K	porB1b_A121D
SAMEA2072318	1998	Greece	10356_1_47	sanchezbuso2019	PRJEB4024	ERR349932	SAMEA2072318	<=64	S	1.5	R	0.125	S	0.016	S	0.002	S	0.006	S	0.064	R	new	1574	32	1583	59	39	67	111	148	153	65	328	15.001	19	8	1	100	2	100	-	-	-	-	-	rpsJ_V57M	-	porB1b_G120K	porB1b_A121D
SAMEA2072321	1998	Russia	10356_1_56	sanchezbuso2019	PRJEB4024	ERR349941	SAMEA2072321	<=64	S	0.75	I	0.125	S	0.016	S	0.002	S	0.003	S	0.125	I	new	new	674	9903	59	39	67	190	148	153	65	1528	68.001	25	1	1	100	2	100	-	-	-	-	-	rpsJ_V57M	-	-	-
SAMEA2072327	1999	Netherlands	10356_1_74	sanchezbuso2019	PRJEB4024	ERR349959	SAMEA2072327	<=64	S	1	R	0.125	S	0.016	S	0.003	S	0.002	S	0.5	I	277	213	27	12078	59	39	67	111	148	786	65	181	2.001	19	100	1	100	2	100	-	-	-	-	-	rpsJ_V57M	-	-	-
SAMEA2072328	1999	United Kingdom	10356_1_77	sanchezbuso2019	PRJEB4024	ERR349962	SAMEA2072328	<=64	S	0.75	R	0.094	S	0.016	S	0.006	S	0.064	R	32	R	247	182	21	8143	59	39	170	78	146	154	65	601	2.002	19	8	100	14	1	100	-	-	-	blaTEM	-	rpsJ_V57M	-	porB1b_G120K	porB1b_A121D
SAMEA2072329	2003	United Kingdom	10356_1_80	sanchezbuso2019	PRJEB4024	ERR349965	SAMEA2072329	<=64	S	0.75	I	0.047	S	0.064	S	0.064	R	0.19	R	1	I	1619	1057	21	1590	126	39	67	78	149	153	65	332	7.001	25	8	1	5	2	100	-	-	-	-	-	rpsJ_V57M	-	porB1b_G120K	porB1b_A121D
SAMEA2072464	2004	Russia	10356_1_86	sanchezbuso2019	PRJEB4024	ERR349971	SAMEA2072464	<=64	S	1	R	1	S	0.023	S	0.094	S	0.75	S	0.064	I	758	90	29	8160	109	39	67	111	148	71	133	338	2.001	19	13	1	100	100	100	-	-	-	-	-	rpsJ_V57M	-	-	-
SAMEA2074537	1998	Caribbean	10356_1_2	sanchezbuso2019	PRJEB4024	ERR349887	SAMEA2074537	<=64	S	0.38	R	0.023	S	0.016	S	0.002	S	0.002	S	12	R	new	101	46	1597	59	39	67	78	148	154	65	287	2.002	19	1	1	100	1	100	-	-	-	blaTEM	-	rpsJ_V57M	-	-	-
SAMEA2074539	1998	Jamaica	10356_1_8	sanchezbuso2019	PRJEB4024	ERR349893	SAMEA2074539	<=64	S	0.5	I	0.125	S	0.016	S	0.002	S	0.003	S	0.125	I	1324	715	16	8163	59	39	170	111	188	71	223	84	22.001	15	100	100	100	7	100	-	-	-	-	-	rpsJ_V57M	-	-	-
SAMEA2074543	1999	United States	10356_1_20	sanchezbuso2019	PRJEB4024	ERR349905	SAMEA2074543	<=64	S	0.5	I	2	R	0.016	S	0.004	S	0.004	S	0.25	I	3305	2001	29	8127	126	39	67	111	149	153	133	9	2.001	32	2	100	100	100	100	-	-	-	-	-	rpsJ_V57M	-	-	porB1b_A121D
SAMEA2074551	1998	Greece	10356_1_43	sanchezbuso2019	PRJEB4024	ERR349928	SAMEA2074551	<=64	S	1	I	0.25	S	0.016	S	0.012	S	0.012	S	2	R	495	91	32	1902	109	39	170	158	148	153	65	585	12.001	66	8	1	100	7	100	-	-	-	-	-	rpsJ_V57M	-	porB1b_G120K	porB1b_A121D
SAMEA2074552	1998	Greece	10356_1_46	sanchezbuso2019	PRJEB4024	ERR349931	SAMEA2074552	<=64	S	2	R	0.19	S	0.016	S	0.008	S	0.25	R	8	R	new	new	39	11197	126	39	67	78	149	154	65	626	2.002	70	8	100	5	2	100	-	-	-	blaTEM	-	rpsJ_V57M	-	porB1b_G120K	porB1b_A121D
SAMEA2074560	1998	Brasil	10356_1_1	sanchezbuso2019	PRJEB4024	ERR349886	SAMEA2074560	<=64	S	0.5	I	0.032	S	0.016	S	0.002	S	0.002	S	0.125	I	64	50	29	1580	126	39	67	111	148	153	133	182	2.001	25	3	100	100	100	100	-	-	-	-	-	rpsJ_V57M	-	-	-
SAMEA2074564	1998	United States	10356_1_16	sanchezbuso2019	PRJEB4024	ERR349901	SAMEA2074564	<=64	S	0.75	I	0.094	S	0.016	S	0.004	S	0.002	S	0.38	I	64	50	29	1580	126	39	67	111	148	153	133	2009	73.001	25	3	100	100	100	100	-	-	-	-	-	rpsJ_V57M	-	-	-
SAMEA2074570	1998	Denmark	10356_1_33	sanchezbuso2019	PRJEB4024	ERR349918	SAMEA2074570	<=64	S	0.75	I	0.094	R	0.016	S	0.002	S	0.002	S	0.25	I	new	new	new	1904	126	39	67	158	148	153	65	3496	19.001	404	100	1	100	7	100	-	-	-	-	-	rpsJ_V57M	-	-	-
SAMEA2074574	1998	Greece	10356_1_45	sanchezbuso2019	PRJEB4024	ERR349930	SAMEA2074574	<=64	S	1.5	I	0.25	S	0.016	S	0.008	S	0.012	S	1.5	R	495	91	32	1902	109	39	170	158	148	153	65	585	12.001	66	8	1	100	7	100	-	-	-	-	-	rpsJ_V57M	-	porB1b_G120K	porB1b_A121D
SAMEA2074759	1999	Spain	10356_1_73	sanchezbuso2019	PRJEB4024	ERR349958	SAMEA2074759	<=64	S	1	I	0.094	S	0.016	S	0.002	S	0.002	S	0.19	I	64	50	29	1580	126	39	67	111	148	153	133	182	2.001	25	3	100	100	100	100	-	-	-	-	-	rpsJ_V57M	-	-	-
SAMEA2074777	1998	Romania	10356_1_54	sanchezbuso2019	PRJEB4024	ERR349939	SAMEA2074777	<=64	S	1	I	0.064	S	0.016	S	0.008	S	0.008	S	4	R	495	91	32	1902	109	39	170	158	148	153	65	587	12.001	68	8	1	100	7	100	-	-	-	blaTEM	-	rpsJ_V57M	-	porB1b_G120K	porB1b_A121D
SAMEA2074780	1998	Turkey	10356_1_63	sanchezbuso2019	PRJEB4024	ERR349948	SAMEA2074780	<=64	S	0.5	I	0.047	S	0.016	S	0.002	S	0.002	S	0.38	I	2886	1754	189	1902	109	39	170	158	148	153	65	336	12.001	5	4	1	100	7	100	-	-	-	-	-	rpsJ_V57M	-	-	-
SAMEA2074782	1999	Spain	10356_1_72	sanchezbuso2019	PRJEB4024	ERR349957	SAMEA2074782	<=64	S	0.75	I	0.125	S	0.016	S	0.008	S	0.006	S	3	R	new	91	new	1902	109	39	170	158	148	153	65	311	12.001	35	8	1	100	7	100	-	-	-	-	-	rpsJ_V57M	-	porB1b_G120K	porB1b_A121D
SAMEA2074787	2004	Russia	10356_1_87	sanchezbuso2019	PRJEB4024	ERR349972	SAMEA2074787	<=64	S	3	I	0.75	S	0.016	S	0.023	S	0.016	S	1.5	R	1537	989	394	1902	109	39	170	158	148	153	65	311	12.001	35	8	1	100	7	100	-	-	-	-	-	rpsJ_V57M	-	porB1b_G120K	porB1b_A121D
SAMEA2076403	2008	Spain	10868_8_20	sanchezbuso2019	PRJEB4024	ERR388299	SAMEA2076403	<=64	S	0.75	I	0.5	S	0.016	S	0.003	S	0.008	S	0.094	I	2992	1808	29	9363	126	39	67	238	148	153	133	63	2.001	9	1	100	100	100	100	-	-	-	-	-	rpsJ_V57M	-	-	-
SAMEA2076408	2009	Norway	10868_8_38	sanchezbuso2019	PRJEB4024	ERR388317	SAMEA2076408	<=64	S	128	R	0.19	S	0.064	S	0.094	S	8	R	32	R	1405	543	110	7823	435	39	170	111	148	153	65	265	43.002	1	12	1	7	6	100	-	-	-	blaTEM	tetM	rpsJ_V57M	rplD_G70D	porB1b_G120K	-
SAMEA2076671	2010	Estonia	10868_8_59	sanchezbuso2019	PRJEB4024	ERR388338	SAMEA2076671	<=64	S	1	I	1	S	0.016	S	0.002	S	0.006	S	0.19	I	2449	1515	29	1580	126	39	67	111	148	153	133	182	2.001	25	3	100	100	100	100	-	-	-	-	-	rpsJ_V57M	-	-	-
SAMEA2076678	2010	Poland	10868_8_80	sanchezbuso2019	PRJEB4024	ERR388359	SAMEA2076678	<=64	S	16	R	0.064	S	0.016	S	0.003	S	0.004	S	0.25	I	8376	96	350	7363	59	39	67	78	148	153	65	308	2.002	10	14	100	100	2	100	-	-	-	-	tetM	rpsJ_V57M	-	-	-
SAMEA2076687	2011	Poland	10900_8_12	sanchezbuso2019	PRJEB4024	ERR388386	SAMEA2076687	<=64	S	0.25	I	0.5	S	0.016	S	0.006	S	0.002	S	0.125	I	8390	5049	29	9363	126	39	67	238	148	153	133	63	2.001	9	1	100	100	100	100	-	-	-	-	-	rpsJ_V57M	-	-	-
SAMEA2076690	2011	Slovenia	10900_8_21	sanchezbuso2019	PRJEB4024	ERR388395	SAMEA2076690	<=64	S	0.75	I	0.5	S	0.016	S	0.003	S	0.004	S	0.19	I	5237	3173	29	9363	126	39	67	238	148	153	133	63	2.001	9	1	100	100	100	100	-	-	-	-	-	rpsJ_V57M	-	-	-
SAMEA2076691	2011	Slovenia	10900_8_24	sanchezbuso2019	PRJEB4024	ERR388398	SAMEA2076691	<=64	S	24	R	0.19	S	0.016	S	0.002	S	2	R	0.25	I	5405	3279	1139	7823	435	39	170	111	148	153	65	273	2.002	1	100	1	7	2	100	-	-	-	-	tetM	-	-	-	-
SAMEA2076721	2008	Greece	10868_8_12	sanchezbuso2019	PRJEB4024	ERR388291	SAMEA2076721	<=64	S	24	R	0.064	S	0.016	S	0.003	S	1.5	R	32	R	2272	402	4	11173	59	39	170	78	147	154	65	new	2.002	new	14	100	1	4	100	-	-	-	blaTEM	tetM	rpsJ_V57M	-	-	-
SAMEA2076722	2008	Poland	10868_8_15	sanchezbuso2019	PRJEB4024	ERR388294	SAMEA2076722	<=64	S	24	R	0.094	S	0.032	S	0.004	S	1	R	32	R	3798	26	835	11189	59	39	67	156	147	153	65	592	2.002	54	13	100	1	18	100	-	-	-	blaTEM	tetM	rpsJ_V57M	-	-	-
SAMEA2076724	2008	Spain	10868_8_21	sanchezbuso2019	PRJEB4024	ERR388300	SAMEA2076724	<=64	S	3	R	0.5	S	0.125	S	0.094	S	0.008	R	2	I	225	4	4	1901	109	39	170	111	148	153	65	177	12.004	1	8	1	1	3	100	-	-	-	-	-	rpsJ_V57M	-	porB1b_G120K	porB1b_A121D
SAMEA2076730	2009	Norway	10868_8_39	sanchezbuso2019	PRJEB4024	ERR388318	SAMEA2076730	<=64	S	3	R	0.25	S	0.016	S	0.023	S	3	R	8	R	5054	3063	58	1588	59	39	67	158	148	71	65	305	2.002	38	8	1	7	15	100	-	-	-	blaTEM	-	rpsJ_V57M	-	porB1b_G120K	porB1b_A121D
SAMEA2076735	2009	Slovenia	10868_8_54	sanchezbuso2019	PRJEB4024	ERR388333	SAMEA2076735	<=64	S	32	R	0.125	S	0.016	S	0.012	S	8	R	8	R	5569	489	137	1588	59	39	67	158	148	71	65	247	19.001	38	12	1	7	15	100	-	-	-	blaTEM	tetM	rpsJ_V57M	-	porB1b_G120K	-
SAMEA2076957	1996	Australia	10900_8_48	sanchezbuso2019	PRJEB4024	ERR388422	SAMEA2076957	<=64	S	3	R	0.38	S	0.016	S	0.023	S	24	R	32	R	904	624	74	1599	59	39	67	157	148	153	65	312	2.002	19	8	1	1	9	100	-	-	-	blaTEM	-	rpsJ_V57M	-	porB1b_G120K	porB1b_A121D
SAMEA2076958	1997	Japan	10900_8_51	sanchezbuso2019	PRJEB4024	ERR388425	SAMEA2076958	<=64	S	2	R	0.75	S	0.125	R	0.094	S	0.25	R	3	R	4127	2520	10	7363	59	39	67	78	148	153	65	2554	10.001	19	17	1	5	2	100	-	-	-	-	-	rpsJ_V57M	-	-	porB1b_A121D
SAMEA2076959	1998	China	10900_8_54	sanchezbuso2019	PRJEB4024	ERR388428	SAMEA2076959	<=64	S	2	R	0.25	S	0.016	S	0.006	S	0.38	R	0.38	R	1085	389	2	1580	126	39	67	111	148	153	133	570	2.001	19	8	1	5	28	100	-	-	-	-	-	rpsJ_V57M	-	porB1b_G120K	porB1b_A121D
SAMEA2076963	1998	Philippines	10900_8_66	sanchezbuso2019	PRJEB4024	ERR388440	SAMEA2076963	<=64	S	2	R	0.19	S	0.016	S	0.006	S	0.38	R	16	R	1083	206	74	1583	59	39	67	111	148	153	65	575	2.001	1	8	100	3	28	100	-	-	-	blaTEM	-	rpsJ_V57M	-	porB1b_G120K	porB1b_A121D
SAMEA2076964	1998	Philippines	10900_8_69	sanchezbuso2019	PRJEB4024	ERR388443	SAMEA2076964	<=64	S	1.5	R	0.125	S	0.016	S	0.004	S	0.25	R	24	R	1083	206	74	1583	59	39	67	111	148	153	65	575	2.001	1	8	100	3	28	100	-	-	-	blaTEM	-	rpsJ_V57M	-	porB1b_G120K	porB1b_A121D
SAMEA2076968	1998	Thailand	10900_8_81	sanchezbuso2019	PRJEB4024	ERR388455	SAMEA2076968	<=64	S	1	I	0.064	S	0.016	S	0.023	S	0.25	R	1.5	I	3033	1831	21	1590	126	39	67	78	149	153	65	281	4.001	25	8	1	5	4	100	-	-	-	-	-	rpsJ_V57M	-	porB1b_G120K	porB1b_A121D
SAMEA2077004	2010	Slovenia	10868_8_84	sanchezbuso2019	PRJEB4024	ERR388363	SAMEA2077004	<=64	S	32	R	0.125	S	0.016	S	0.008	S	2	R	4	R	5613	3403	137	1588	59	39	67	158	148	71	65	309	19.001	38	100	1	7	15	100	-	-	-	blaTEM	tetM	rpsJ_V57M	-	-	-
SAMEA2077006	2011	Estonia	10868_8_90	sanchezbuso2019	PRJEB4024	ERR388369	SAMEA2077006	<=64	S	32	R	0.5	S	0.016	S	0.012	S	24	R	8	R	3611	785	60	1588	59	39	67	158	148	71	65	567	19.001	38	12	1	7	26	100	-	-	-	blaTEM	tetM	rpsJ_V57M	-	porB1b_G120K	-
SAMEA2077015	2011	Slovenia	10900_8_22	sanchezbuso2019	PRJEB4024	ERR388396	SAMEA2077015	<=64	S	0.75	I	0.19	S	0.016	S	0.012	S	0.008	S	4	R	8658	5126	115	8131	109	113	170	158	148	153	65	311	12.001	35	8	1	100	7	100	-	-	-	blaTEM	-	rpsJ_V57M	-	porB1b_G120K	porB1b_A121D
SAMEA2077016	2012	Estonia	10900_8_25	sanchezbuso2019	PRJEB4024	ERR388399	SAMEA2077016	<=64	S	4	R	0.125	S	0.016	S	0.016	S	6	R	4	R	211	90	58	1588	59	39	67	158	148	71	65	268	19.001	38	13	1	7	20	100	-	-	-	blaTEM	tetM	rpsJ_V57M	-	-	-
SAMEA2077022	2012	Slovenia	10900_8_43	sanchezbuso2019	PRJEB4024	ERR388417	SAMEA2077022	<=64	S	32	R	0.094	S	0.016	S	0.008	S	32	R	8	R	8662	2281	1102	1588	59	39	67	158	148	71	65	247	19.001	38	12	1	7	15	100	-	-	-	blaTEM	tetM	rpsJ_V57M	-	porB1b_G120K	-
SAMEA2077271	1997	Australia	10900_8_49	sanchezbuso2019	PRJEB4024	ERR388423	SAMEA2077271	<=64	S	3	R	0.25	S	0.032	S	0.032	S	0.75	R	3	I	270	206	33	1890	59	39	67	78	149	71	65	313	12.001	16	8	1	5	1	100	-	-	-	-	-	rpsJ_V57M	-	porB1b_G120K	porB1b_A121D
SAMEA2077272	1998	Japan	10900_8_52	sanchezbuso2019	PRJEB4024	ERR388426	SAMEA2077272	<=64	S	2	R	0.5	S	0.016	S	0.016	S	0.38	R	0.75	R	4123	2516	10	7363	59	39	67	78	148	153	65	569	2.001	19	26	1	5	2	100	-	-	-	-	-	rpsJ_V57M	-	porB1b_G120K	-
SAMEA2077273	1998	Hong Kong	10900_8_58	sanchezbuso2019	PRJEB4024	ERR388432	SAMEA2077273	<=64	S	1	R	0.094	S	0.016	S	0.023	S	6	R	1.5	R	new	206	508	11077	126	39	67	158	148	154	65	572	5.002	63	8	1	1	10	100	-	-	-	-	-	rpsJ_V57M	-	porB1b_G120K	porB1b_A121D
SAMEA2077276	1998	Philippines	10900_8_67	sanchezbuso2019	PRJEB4024	ERR388441	SAMEA2077276	<=64	S	0.75	R	0.19	S	0.016	S	0.003	S	0.75	R	0.25	I	568	90	33	1582	59	39	170	78	148	154	65	576	2.002	19	13	100	1	29	100	-	-	-	-	-	rpsJ_V57M	-	-	-
SAMEA2077277	1998	Philippines	10900_8_70	sanchezbuso2019	PRJEB4024	ERR388444	SAMEA2077277	<=64	S	12	R	0.032	S	0.016	S	0.002	S	0.002	S	4	R	new	516	new	11194	109	142	67	111	148	153	65	599	2.001	54	14	100	100	1	100	-	-	-	blaTEM	tetM	rpsJ_V57M	-	-	-
SAMEA2077279	1998	Thailand	10900_8_79	sanchezbuso2019	PRJEB4024	ERR388453	SAMEA2077279	<=64	S	2	R	0.19	S	0.016	S	0.006	S	0.125	R	96	R	3032	1830	21	8143	59	39	170	78	146	154	65	601	2.002	19	8	100	14	1	100	-	-	-	blaTEM	-	rpsJ_V57M	-	porB1b_G120K	porB1b_A121D
SAMEA2080235	2008	Denmark	10868_8_7	sanchezbuso2019	PRJEB4024	ERR388286	SAMEA2080235	<=64	S	1	I	0.38	S	0.016	S	0.008	S	0.003	S	0.75	I	3766	2272	25	1893	59	39	67	157	147	153	133	142	9.001	25	1	1	100	2	100	-	-	-	-	-	rpsJ_V57M	-	-	-
SAMEA2080316	2009	Slovenia	10868_8_52	sanchezbuso2019	PRJEB4024	ERR388331	SAMEA2080316	<=64	S	0.75	I	0.094	S	0.016	S	0.012	S	0.004	S	0.75	I	359	301	29	8126	126	39	67	78	148	153	133	543	66.001	25	3	100	100	100	100	-	-	-	-	-	rpsJ_V57M	-	-	-
SAMEA2080317	2009	Slovenia	10868_8_55	sanchezbuso2019	PRJEB4024	ERR388334	SAMEA2080317	<=64	S	1.5	R	0.19	S	0.023	S	0.016	S	32	R	2	I	225	4	4	1901	109	39	170	111	148	153	65	177	12.004	1	8	1	1	3	100	-	-	-	-	-	rpsJ_V57M	-	porB1b_G120K	porB1b_A121D
SAMEA2080318	2010	Estonia	10868_8_58	sanchezbuso2019	PRJEB4024	ERR388337	SAMEA2080318	<=64	S	16	R	0.125	S	0.016	S	0.012	S	4	R	12	R	211	90	58	1588	59	39	67	158	148	71	65	268	19.001	38	13	1	7	20	100	-	-	-	blaTEM	tetM	rpsJ_V57M	-	-	-
SAMEA2080324	2010	Poland	10868_8_79	sanchezbuso2019	PRJEB4024	ERR388358	SAMEA2080324	<=64	S	6	R	0.125	S	0.023	S	0.047	S	1.5	R	0.38	I	1405	543	110	7823	435	39	170	111	148	153	65	265	43.002	1	12	1	7	6	100	-	-	-	-	tetM	rpsJ_V57M	-	porB1b_G120K	-
SAMEA2080325	2010	Poland	10868_8_82	sanchezbuso2019	PRJEB4024	ERR388361	SAMEA2080325	<=64	S	48	R	0.19	S	0.032	S	0.032	S	4	R	0.5	I	1405	543	110	7823	435	39	170	111	148	153	65	265	43.002	1	12	1	7	6	100	-	-	-	-	tetM	rpsJ_V57M	-	porB1b_G120K	-
SAMEA2080388	2011	Estonia	10868_8_91	sanchezbuso2019	PRJEB4024	ERR388370	SAMEA2080388	<=64	S	48	R	0.38	S	0.016	S	0.012	S	12	R	16	R	3611	785	60	1588	59	39	67	158	148	71	65	567	19.001	38	12	1	7	26	100	-	-	-	blaTEM	tetM	rpsJ_V57M	-	porB1b_G120K	-
SAMEA2080395	2011	Poland	10900_8_17	sanchezbuso2019	PRJEB4024	ERR388391	SAMEA2080395	<=64	S	64	R	0.19	S	0.023	S	0.047	S	4	R	0.75	I	1405	543	110	7823	435	39	170	111	148	153	65	265	43.002	1	12	1	7	6	100	-	-	-	-	tetM	rpsJ_V57M	-	porB1b_G120K	-
SAMEA2080396	2011	Slovenia	10900_8_20	sanchezbuso2019	PRJEB4024	ERR388394	SAMEA2080396	<=64	S	1.5	R	0.125	S	0.016	S	0.016	S	2	R	16	R	8654	5124	58	1588	59	39	67	158	148	71	65	305	2.002	38	8	1	7	15	100	-	-	-	blaTEM	-	rpsJ_V57M	-	porB1b_G120K	porB1b_A121D
SAMEA2080403	2012	Slovenia	10900_8_41	sanchezbuso2019	PRJEB4024	ERR388415	SAMEA2080403	<=64	S	0.5	I	4	R	0.016	S	0.003	S	0.004	S	0.19	I	1313	847	29	1580	126	39	67	111	148	153	133	274	2.001	9	3	100	100	100	2	-	-	23S_rDNA_c2597t	-	-	rpsJ_V57M	-	-	-
SAMEA2080404	2012	Slovenia	10900_8_44	sanchezbuso2019	PRJEB4024	ERR388418	SAMEA2080404	<=64	S	2	R	12	R	0.016	S	0.012	S	32	R	0.38	I	2997	866	21	1582	59	39	170	78	148	154	65	275	2.002	19	8	100	1	18	2	-	-	23S_rDNA_c2597t	-	-	rpsJ_V57M	-	porB1b_G120K	porB1b_A121D
SAMEA2080405	1996	Australia	10900_8_47	sanchezbuso2019	PRJEB4024	ERR388421	SAMEA2080405	<=64	S	4	I	0.5	S	0.25	S	0.125	R	32	R	2	I	1422	915	21	1590	126	39	67	78	149	153	65	5	7.001	25	8	1	2	11	100	-	-	-	-	-	rpsJ_V57M	-	porB1b_G120K	porB1b_A121D
SAMEA2080406	1997	Japan	10900_8_50	sanchezbuso2019	PRJEB4024	ERR388424	SAMEA2080406	<=64	S	3	R	0.5	S	0.064	S	0.047	S	0.5	R	1	R	4093	2488	10	7363	59	39	67	78	148	153	65	276	2.001	19	11	1	5	2	100	-	-	-	-	-	rpsJ_V57M	-	porB1b_G120K	-
SAMEA2080407	1998	Japan	10900_8_53	sanchezbuso2019	PRJEB4024	ERR388427	SAMEA2080407	<=64	S	2	R	0.38	S	0.094	R	0.094	S	0.5	R	3	R	4068	2465	10	7363	59	39	67	78	148	153	65	23	10.001	19	11	1	5	2	100	-	-	-	-	-	rpsJ_V57M	-	porB1b_G120K	-
SAMEA2080408	1998	China	10900_8_56	sanchezbuso2019	PRJEB4024	ERR388430	SAMEA2080408	<=64	S	2	R	0.094	S	0.016	S	0.016	S	16	R	1.5	I	new	1836	4	11193	59	39	67	158	149	153	133	597	5.002	19	12	1	2	36	100	-	-	-	-	-	rpsJ_V57M	-	porB1b_G120K	-
SAMEA2080409	1998	Indonesia	10900_8_59	sanchezbuso2019	PRJEB4024	ERR388433	SAMEA2080409	<=64	S	24	R	0.094	S	0.016	S	0.003	S	0.002	S	32	R	new	7562	new	7365	126	39	67	111	148	153	65	314	2.001	1	100	100	100	2	100	-	-	-	blaTEM	tetM	rpsJ_V57M	-	-	-
SAMEA2080468	1998	Philippines	10900_8_65	sanchezbuso2019	PRJEB4024	ERR388439	SAMEA2080468	<=64	S	1.5	R	0.25	S	0.016	S	0.004	S	0.38	R	0.38	R	1085	389	2	1580	126	39	67	111	148	153	133	570	2.001	19	8	1	5	28	100	-	-	-	-	-	rpsJ_V57M	-	porB1b_G120K	porB1b_A121D
SAMEA2080469	1998	Philippines	10900_8_68	sanchezbuso2019	PRJEB4024	ERR388442	SAMEA2080469	<=64	S	1	R	0.19	S	0.016	S	0.003	S	0.75	R	0.25	I	568	90	33	1582	59	39	170	78	148	154	65	576	2.002	19	13	100	1	29	100	-	-	-	-	-	rpsJ_V57M	-	-	-
SAMEA2080470	1998	Philippines	10900_8_71	sanchezbuso2019	PRJEB4024	ERR388445	SAMEA2080470	<=64	S	0.38	I	0.032	S	0.016	S	0.003	S	1.5	R	12	R	new	new	new	8130	59	39	170	78	149	154	65	577	2.002	54	100	100	1	4	100	-	-	-	blaTEM	-	rpsJ_V57M	-	-	-
SAMEA2080472	1998	Thailand	10900_8_77	sanchezbuso2019	PRJEB4024	ERR388451	SAMEA2080472	<=64	S	256	R	0.125	S	0.016	S	0.008	S	0.008	S	1	I	new	391	736	1583	59	39	67	111	148	153	65	279	2.002	1	8	1	100	2	100	-	-	-	-	tetM	rpsJ_V57M	-	porB1b_G120K	porB1b_A121D
SAMEA2080473	1998	Thailand	10900_8_80	sanchezbuso2019	PRJEB4024	ERR388454	SAMEA2080473	<=64	S	0.38	R	0.023	S	0.016	S	0.002	S	0.047	R	0.094	R	new	2484	285	11197	126	39	67	78	149	154	65	602	2.002	70	11	100	5	2	100	-	-	-	-	-	rpsJ_V57M	-	porB1b_G120K	-
SAMEA2080475	1999	Japan	12082_1_22	sanchezbuso2019	PRJEB4024	ERR485172	SAMEA2080475	<=64	S	3	R	0.38	S	0.125	R	0.094	S	0.5	R	2	R	4062	2461	10	7363	59	39	67	78	148	153	65	280	10.001	19	9	1	5	2	100	-	-	-	-	-	rpsJ_V57M	-	-	porB1b_A121D
SAMEA2142434	2008	Indonesia	10625_6_40	sanchezbuso2019	PRJEB4024	ERR363615	SAMEA2142434	<=64	S	24	R	0.064	S	0.016	S	0.003	S	1	R	0.094	I	3774	2280	295	8141	109	39	67	156	149	153	65	3491	151.001	54	100	1	1	18	100	-	-	-	-	tetM	rpsJ_V57M	-	-	-
SAMEA2143131	2000	Japan	10625_6_5	sanchezbuso2019	PRJEB4024	ERR363580	SAMEA2143131	<=64	S	3	R	0.38	S	0.032	S	0.032	S	0.75	R	1	R	4090	2485	10	7363	59	39	67	78	148	153	65	276	2.001	19	11	1	5	2	100	-	-	-	-	-	rpsJ_V57M	-	porB1b_G120K	-
SAMEA2144091	2008	Philippines	10625_6_45	sanchezbuso2019	PRJEB4024	ERR363620	SAMEA2144091	<=64	S	0.75	I	0.125	S	0.016	S	0.008	S	3	R	3	R	1512	90	386	1588	59	39	67	158	148	71	65	622	19.001	69	13	100	7	20	100	-	-	-	blaTEM	-	rpsJ_V57M	-	-	-
SAMEA2144471	1999	Thailand	10625_6_2	sanchezbuso2019	PRJEB4024	ERR363577	SAMEA2144471	<=64	S	0.5	I	0.016	S	0.016	S	0.002	S	2	R	8	R	new	697	new	1582	59	39	170	78	148	154	65	606	2.002	54	14	100	1	22	100	-	-	-	blaTEM	-	rpsJ_V57M	-	-	-
SAMEA2144510	2003	Japan	10625_6_20	sanchezbuso2019	PRJEB4024	ERR363595	SAMEA2144510	<=64	S	2	R	0.25	S	0.5	R	0.064	S	32	R	2	R	1424	917	10	7363	59	39	67	78	148	153	65	4	10.001	19	8	1	2	5	100	-	-	-	-	-	rpsJ_V57M	-	porB1b_G120K	porB1b_A121D
SAMEA2145272	2008	Vietnam	10625_6_56	sanchezbuso2019	PRJEB4024	ERR363631	SAMEA2145272	<=64	S	192	R	0.125	S	0.023	S	0.016	S	32	R	8	R	3770	2276	703	9364	435	39	67	158	148	71	65	567	19.001	38	12	1	7	26	100	-	-	-	blaTEM	tetM	rpsJ_V57M	-	porB1b_G120K	-
SAMEA2145719	2004	Australia	10625_6_23	sanchezbuso2019	PRJEB4024	ERR363598	SAMEA2145719	<=64	S	1	I	0.064	S	0.016	S	0.006	S	0.003	S	0.25	I	1260	812	324	7371	59	39	170	111	148	153	65	2673	22.001	10	100	100	100	7	100	-	-	-	-	-	rpsJ_V57M	-	-	-
SAMEA2146663	2008	China	10625_6_35	sanchezbuso2019	PRJEB4024	ERR363610	SAMEA2146663	<=64	S	256	R	0.38	S	0.016	S	0.008	S	32	R	0.75	R	2277	505	33	7822	126	39	170	111	148	153	65	73	2.002	19	8	1	7	3	100	-	-	-	-	tetM	rpsJ_V57M	-	porB1b_G120K	porB1b_A121D
SAMEA2146799	2000	Japan	10625_6_6	sanchezbuso2019	PRJEB4024	ERR363581	SAMEA2146799	<=64	S	3	R	0.38	S	0.032	S	0.047	S	1.5	R	0.75	R	4080	2476	10	7363	59	39	67	78	148	153	65	318	2.001	19	8	1	2	2	100	-	-	-	-	-	rpsJ_V57M	-	porB1b_G120K	porB1b_A121D
SAMEA2146829	2008	Thailand	10625_6_46	sanchezbuso2019	PRJEB4024	ERR363621	SAMEA2146829	<=64	S	24	R	0.125	S	0.016	S	0.006	S	0.38	R	4	R	3759	2265	122	11201	59	39	67	156	148	71	65	611	19.001	71	13	1	7	1	100	-	-	-	blaTEM	tetM	rpsJ_V57M	-	-	-
SAMEA2147733	2011	Pakistan	10625_6_95	sanchezbuso2019	PRJEB4024	ERR363670	SAMEA2147733	<=64	S	3	I	0.19	S	0.016	S	0.008	S	3	R	0.38	I	6319	3614	688	1599	59	39	67	157	148	153	65	2162	9.001	74	27	100	7	10	100	-	-	-	-	-	rpsJ_V57M	-	-	-
SAMEA2148127	2001	Japan	10625_6_12	sanchezbuso2019	PRJEB4024	ERR363587	SAMEA2148127	<=64	S	2	R	0.75	S	0.016	S	0.016	S	6	R	1.5	R	4091	2486	21	7363	59	39	67	78	148	153	65	335	5.002	1	8	1	1	6	100	-	-	-	-	-	rpsJ_V57M	-	porB1b_G120K	porB1b_A121D
SAMEA2148877	2004	Australia	10625_6_24	sanchezbuso2019	PRJEB4024	ERR363599	SAMEA2148877	<=64	S	256	R	0.125	S	0.016	S	0.012	S	0.25	R	0.75	I	1257	809	18	7365	126	39	67	111	148	153	65	334	2.001	1	8	1	5	1	100	-	-	-	-	tetM	rpsJ_V57M	-	porB1b_G120K	porB1b_A121D
SAMEA2149198	2008	Thailand	10625_6_55	sanchezbuso2019	PRJEB4024	ERR363630	SAMEA2149198	<=64	S	24	R	0.064	S	0.032	S	0.004	S	1.5	R	0.75	R	2031	1281	4	1588	59	39	67	158	148	71	65	2159	19.001	10	19	100	7	15	100	-	-	-	blaTEM	tetM	rpsJ_V57M	-	-	-
SAMEA2149232	1999	Thailand	10625_6_1	sanchezbuso2019	PRJEB4024	ERR363576	SAMEA2149232	<=64	S	1	I	0.064	S	0.016	S	0.016	S	0.25	R	2	I	3033	1831	21	1590	126	39	67	78	149	153	65	281	4.001	25	8	1	5	4	100	-	-	-	-	-	rpsJ_V57M	-	porB1b_G120K	porB1b_A121D
SAMEA2149548	2007	Australia	10625_6_31	sanchezbuso2019	PRJEB4024	ERR363606	SAMEA2149548	<=64	S	32	R	0.25	S	0.016	S	0.008	S	0.125	R	0.5	I	621	90	18	1903	126	39	67	157	148	153	65	3	2.001	1	13	1	5	1	100	-	-	-	-	tetM	rpsJ_V57M	-	-	-
SAMEA2150743	2001	Japan	10625_6_14	sanchezbuso2019	PRJEB4024	ERR363589	SAMEA2150743	<=64	S	3	R	0.5	S	0.125	R	0.064	S	32	R	4	R	4101	2496	10	1596	59	39	67	78	148	71	65	4	10.001	19	8	1	2	5	100	-	-	-	-	-	rpsJ_V57M	-	porB1b_G120K	porB1b_A121D
SAMEA2151820	2008	Thailand	10625_6_49	sanchezbuso2019	PRJEB4024	ERR363624	SAMEA2151820	<=64	S	48	R	0.064	S	0.016	S	0.008	S	1.5	R	0.38	I	new	2268	294	1588	59	39	67	158	148	71	65	309	19.001	38	100	1	7	15	100	-	-	-	-	tetM	rpsJ_V57M	-	-	-
SAMEA2152923	2010	India	10625_6_76	sanchezbuso2019	PRJEB4024	ERR363651	SAMEA2152923	<=64	S	1	I	0.25	S	0.016	S	0.023	S	0.094	R	0.5	I	6085	139	1231	1927	126	39	67	78	149	71	65	326	4.001	25	100	1	2	10	100	-	-	-	-	-	rpsJ_V57M	-	-	-
SAMEA2152926	2001	Japan	10625_6_13	sanchezbuso2019	PRJEB4024	ERR363588	SAMEA2152926	<=64	S	2	R	0.38	S	0.125	R	0.047	S	32	R	2	R	1424	917	10	7363	59	39	67	78	148	153	65	4	10.001	19	8	1	2	5	100	-	-	-	-	-	rpsJ_V57M	-	porB1b_G120K	porB1b_A121D
SAMEA2153254	2010	Pakistan	10625_6_92	sanchezbuso2019	PRJEB4024	ERR363667	SAMEA2153254	<=64	S	24	R	0.19	S	0.016	S	0.012	S	4	R	4	R	338	90	121	1588	59	39	67	158	148	71	65	268	19.001	38	13	1	7	20	100	-	-	-	blaTEM	tetM	rpsJ_V57M	-	-	-
SAMEA2153965	2008	Thailand	10625_6_51	sanchezbuso2019	PRJEB4024	ERR363626	SAMEA2153965	<=64	S	32	R	0.125	S	0.016	S	0.003	S	3	R	32	R	2233	723	334	11210	59	39	170	190	147	153	65	337	2.002	48	100	100	1	18	100	-	-	-	blaTEM	tetM	rpsJ_V57M	-	-	-
SAMEA2155627	2000	Japan	10625_6_10	sanchezbuso2019	PRJEB4024	ERR363585	SAMEA2155627	<=64	S	1	I	0.19	S	0.125	S	0.125	R	32	R	1.5	I	4027	1059	241	1590	126	39	67	78	149	153	65	320	7.001	25	8	1	2	5	100	-	-	-	-	-	rpsJ_V57M	-	porB1b_G120K	porB1b_A121D
SAMEA2156080	2008	Thailand	10625_6_47	sanchezbuso2019	PRJEB4024	ERR363622	SAMEA2156080	<=64	S	16	R	0.047	S	0.016	S	0.004	S	0.125	R	6	R	new	new	4	8130	59	39	170	78	149	154	65	1532	69.001	54	14	100	1	2	100	-	-	-	blaTEM	tetM	rpsJ_V57M	-	-	-
SAMEA2157352	2008	Indonesia	10625_6_39	sanchezbuso2019	PRJEB4024	ERR363614	SAMEA2157352	<=64	S	24	R	0.064	S	0.016	S	0.003	S	1.5	R	16	R	201	147	54	1891	59	39	67	111	149	153	133	1530	69.001	18	14	100	1	18	100	-	-	-	blaTEM	tetM	rpsJ_V57M	-	-	-
SAMEA2157700	2004	Australia	10625_6_26	sanchezbuso2019	PRJEB4024	ERR363601	SAMEA2157700	<=64	S	0.75	I	0.023	S	0.016	S	0.003	S	0.002	S	0.094	I	64	50	29	1580	126	39	67	111	148	153	133	182	2.001	25	3	100	100	100	100	-	-	-	-	-	rpsJ_V57M	-	-	-
SAMEA2158494	2010	India	10625_6_73	sanchezbuso2019	PRJEB4024	ERR363648	SAMEA2158494	<=64	S	1	R	0.25	S	0.016	S	0.008	S	8	R	0.38	I	6082	3622	1233	11180	709	39	67	111	149	153	65	3492	2.001	64	3	1	2	10	100	-	-	-	-	-	rpsJ_V57M	-	-	-
SAMEA2159110	2009	Pakistan	10625_6_71	sanchezbuso2019	PRJEB4024	ERR363646	SAMEA2159110	<=64	S	24	R	0.19	S	0.016	S	0.012	S	4	R	0.5	I	338	90	121	1588	59	39	67	158	148	71	65	268	19.001	38	13	1	7	20	100	-	-	-	-	tetM	rpsJ_V57M	-	-	-
SAMEA2160712	2001	Japan	10625_6_19	sanchezbuso2019	PRJEB4024	ERR363594	SAMEA2160712	<=64	S	1.5	R	0.5	S	0.125	R	0.047	S	32	R	1.5	I	8132	175	10	1596	59	39	67	78	148	71	65	329	10.001	19	1	1	2	5	100	-	-	-	-	-	rpsJ_V57M	-	-	-
SAMEA2161002	2010	India	10625_6_80	sanchezbuso2019	PRJEB4024	ERR363655	SAMEA2161002	<=64	S	1	I	0.094	S	0.023	S	0.047	S	2	R	2	I	6085	139	1231	1927	126	39	67	78	149	71	65	326	4.001	25	100	1	2	10	100	-	-	-	-	-	rpsJ_V57M	-	-	-
SAMEA2162593	2008	Philippines	10625_6_41	sanchezbuso2019	PRJEB4024	ERR363616	SAMEA2162593	<=64	S	32	R	0.032	S	0.016	S	0.002	S	1	R	32	R	2113	147	272	1582	59	39	170	78	148	154	65	1531	2.009	54	14	100	1	4	100	-	-	-	blaTEM	tetM	rpsJ_V57M	-	-	-
SAMEA2201873	2011	Vietnam	11792_4_11	sanchezbuso2019	PRJEB4024	ERR449465	SAMEA2201873	<=64	S	96	R	0.094	S	0.016	S	0.012	S	3	R	1	I	7139	1498	137	1588	59	39	67	158	148	71	65	639	19.001	25	8	1	7	43	100	-	-	-	-	tetM	rpsJ_V57M	-	porB1b_G120K	porB1b_A121D
SAMEA2201874	2011	Vietnam	11792_4_12	sanchezbuso2019	PRJEB4024	ERR449466	SAMEA2201874	<=64	S	0.75	R	0.38	S	0.023	S	0.047	S	32	R	0.75	I	7724	4645	949	10313	109	39	170	158	148	668	65	640	18.001	59	100	1	7	47	100	-	-	-	-	-	rpsJ_V57M	-	-	-
SAMEA2201876	2011	Vietnam	11792_4_14	sanchezbuso2019	PRJEB4024	ERR449468	SAMEA2201876	<=64	S	96	R	0.25	S	0.064	S	0.125	S	32	R	32	R	7741	4637	156	11230	435	39	170	111	149	153	65	345	43.002	1	8	1	7	3	100	-	-	-	blaTEM	tetM	rpsJ_V57M	-	porB1b_G120K	porB1b_A121D
SAMEA2201877	2011	Vietnam	11792_4_15	sanchezbuso2019	PRJEB4024	ERR449469	SAMEA2201877	<=64	S	2	R	0.75	S	0.094	S	0.19	S	32	R	32	R	4676	543	107	11231	59	39	67	78	147	154	65	346	18.001	1	12	1	7	3	100	-	-	-	blaTEM	-	rpsJ_V57M	-	porB1b_G120K	-
SAMEA2201893	1998	Cabo Verde	11792_4_32	sanchezbuso2019	PRJEB4024	ERR449485	SAMEA2201893	<=64	S	16	R	0.016	S	0.016	S	0.002	S	0.002	S	12	R	758	90	29	1583	59	39	67	111	148	153	65	350	14.001	1	13	100	100	2	100	-	-	-	blaTEM	tetM	rpsJ_V57M	-	-	-
SAMEA2201895	1998	Gambia	11792_4_34	sanchezbuso2019	PRJEB4024	ERR449487	SAMEA2201895	<=64	S	24	R	0.032	S	0.016	S	0.004	S	0.002	S	4	R	3187	64	719	8139	109	39	67	78	148	71	133	2155	2.002	290	14	1	100	1	100	-	-	-	blaTEM	tetM	rpsJ_V57M	-	-	-
SAMEA2201896	1998	Gambia	11792_4_35	sanchezbuso2019	PRJEB4024	ERR449488	SAMEA2201896	<=64	S	8	R	0.047	S	0.016	S	0.006	S	0.002	S	3	R	3187	64	719	8139	109	39	67	78	148	71	133	351	2.002	18	14	1	100	1	100	-	-	-	blaTEM	tetM	rpsJ_V57M	-	-	-
SAMEA2201898	1998	Morocco	11792_4_37	sanchezbuso2019	PRJEB4024	ERR449490	SAMEA2201898	<=64	S	1.5	R	0.125	S	0.016	S	0.004	S	0.008	S	0.5	R	1247	182	74	1583	59	39	67	111	148	153	65	1534	2.02	19	8	1	100	2	100	-	-	-	-	-	rpsJ_V57M	-	porB1b_G120K	porB1b_A121D
SAMEA2201904	1999	Guinea	11792_4_44	sanchezbuso2019	PRJEB4024	ERR449496	SAMEA2201904	<=64	S	32	R	0.023	S	0.016	S	0.002	S	0.002	S	32	R	new	new	15	12083	59	39	67	78	148	153	796	2008	2.011	82	3	100	100	2	100	-	-	-	blaTEM	tetM	rpsJ_V57M	-	-	-
SAMEA2201908	2007	Guinea-Bissau	11792_4_48	sanchezbuso2019	PRJEB4024	ERR449500	SAMEA2201908	<=64	S	8	R	0.047	S	0.016	S	0.003	S	0.002	S	2	R	3187	64	719	1603	109	39	67	78	148	71	65	646	2.002	57	14	1	100	1	100	-	-	-	blaTEM	tetM	rpsJ_V57M	-	-	-
SAMEA2201921	2007	Guinea-Bissau	11792_4_61	sanchezbuso2019	PRJEB4024	ERR449513	SAMEA2201921	<=64	S	16	R	0.032	S	0.016	S	0.002	S	2	R	0.047	I	5302	3212	602	8161	59	39	67	157	188	153	65	356	2.001	10	100	100	1	18	100	-	-	-	-	tetM	rpsJ_V57M	-	-	-
SAMEA2201929	2007	Guinea-Bissau	11792_4_69	sanchezbuso2019	PRJEB4024	ERR449521	SAMEA2201929	<=64	S	24	R	0.125	S	0.016	S	0.002	S	1.5	R	0.125	I	3186	1926	723	8161	59	39	67	157	188	153	65	360	2.001	35	3	100	1	18	100	-	-	-	-	tetM	rpsJ_V57M	-	-	-
SAMEA2298450	2000	Denmark	DO00_15	golparian2020	PRJEB4024	ERR502180	SAMEA2298450	No data	S	No data	R	No data	S	No data	S	No data	S	No data	R	No data	I	1224	158	144	1582	59	39	170	78	148	154	65	1453	2.001	19	8	100	1	31	100	-	-	-	-	-	rpsJ_V57M	-	porB1b_G120K	porB1b_A121D
SAMEA2298457	2006	Denmark	DO06_398	golparian2020	PRJEB4024	ERR502187	SAMEA2298457	No data	S	No data	I	No data	S	No data	S	No data	S	No data	S	No data	I	370	262	25	1893	59	39	67	157	147	153	133	142	9.001	25	1	1	100	2	100	-	-	-	-	-	rpsJ_V57M	-	-	-
SAMEA2298459	2007	Denmark	DO07_9	golparian2020	PRJEB4024	ERR502189	SAMEA2298459	No data	S	No data	R	No data	S	No data	S	No data	S	No data	R	No data	R	12957	7536	137	9364	435	39	67	158	148	71	65	567	19.001	38	12	1	7	26	100	-	-	-	blaTEM	tetM	rpsJ_V57M	-	porB1b_G120K	-
SAMEA2298468	2013	Denmark	DO13_72	golparian2020	PRJEB4024	ERR502198	SAMEA2298468	No data	S	No data	I	No data	S	No data	S	No data	S	No data	R	No data	R	12958	461	2215	8130	59	39	170	78	149	154	65	1455	19.001	54	4	100	1	22	100	-	-	-	blaTEM	-	rpsJ_V57M	-	-	-
SAMEA2298469	2013	Denmark	DO13_88	golparian2020	PRJEB4024	ERR502199	SAMEA2298469	No data	S	No data	I	No data	S	No data	S	No data	S	No data	S	No data	I	2992	1808	29	9363	126	39	67	238	148	153	133	63	2.001	9	1	100	100	100	100	-	-	-	-	-	rpsJ_V57M	-	-	-
SAMEA2298471	2013	Denmark	DO13_142	golparian2020	PRJEB4024	ERR502201	SAMEA2298471	No data	S	No data	R	No data	S	No data	S	No data	S	No data	R	No data	R	12959	7537	137	1588	59	39	67	158	148	71	65	1356	19.001	38	8	1	7	15	100	-	-	-	blaTEM	tetM	rpsJ_V57M	-	porB1b_G120K	porB1b_A121D
SAMEA2298477	2013	Denmark	DO13_327	golparian2020	PRJEB4024	ERR502207	SAMEA2298477	No data	S	No data	I	No data	S	No data	S	No data	S	No data	S	No data	I	7674	2777	29	11428	126	39	170	238	734	153	133	63	2.001	9	1	100	100	100	100	-	-	-	-	-	rpsJ_V57M	-	-	-
SAMEA2298478	2013	Denmark	DO13_360	golparian2020	PRJEB4024	ERR502208	SAMEA2298478	No data	S	No data	R	No data	S	No data	S	No data	S	No data	R	No data	R	12961	7540	137	1588	59	39	67	158	148	71	65	247	19.001	38	12	1	7	15	100	-	-	-	blaTEM	tetM	rpsJ_V57M	rplD_G70D	porB1b_G120K	-
SAMEA2298481	2013	Denmark	DO13_242	golparian2020	PRJEB4024	ERR502211	SAMEA2298481	No data	S	No data	R	No data	S	No data	S	No data	S	No data	R	No data	R	12962	1164	21	7365	126	39	67	111	148	153	65	1451	2.002	18	3	1	5	6	100	-	-	-	blaTEM	tetM	rpsJ_V57M	-	-	-
SAMEA2298506	1996	Denmark	DO96_47	golparian2020	PRJEB4024	ERR502236	SAMEA2298506	No data	S	No data	I	No data	S	No data	S	No data	S	No data	S	No data	I	64	50	29	1580	126	39	67	111	148	153	133	182	2.001	25	3	100	100	100	100	-	-	-	-	-	rpsJ_V57M	-	-	-
SAMEA2298507	1996	Denmark	DO96_92	golparian2020	PRJEB4024	ERR502237	SAMEA2298507	No data	S	No data	I	No data	S	No data	S	No data	S	No data	S	No data	I	64	50	29	1580	126	39	67	111	148	153	133	182	2.001	25	3	100	100	100	100	-	-	-	-	-	rpsJ_V57M	-	-	-
SAMEA2298508	2012	Ivory Coast	12273_1_63	sanchezbuso2019	PRJEB4024	ERR502238	SAMEA2298508	<=64	S	16	R	0.094	S	0.016	S	0.003	S	0.125	R	>32	R	9902	5847	60	8112	59	39	67	157	189	153	65	2674	19.001	10	3	100	5	7	100	-	-	-	blaTEM	tetM	rpsJ_V57M	-	-	-
SAMEA3165224	2006	United States	GCGS1015	grad2016	PRJEB7904	ERR854886	SAMEA3165224	No data	S	No data	R	0.063	S	0.032	S	0.016	S	4	R	No data	I	new	new	4	1901	109	39	170	111	148	153	65	26	12.001	1	8	1	1	3	100	-	-	-	-	-	rpsJ_V57M	-	porB1b_G120K	porB1b_A121D
SAMEA3165228	2007	United States	GCGS1029	grad2016	PRJEB7904	ERR854889	SAMEA3165228	No data	S	No data	I	0.25	S	1	S	1	R	0.125	R	No data	I	new	new	new	11411	126	39	67	156	149	153	65	380	7.001	25	100	1	5	2	100	-	-	-	-	-	rpsJ_V57M	-	-	-
SAMEA3165240	2006	United States	GCGS393	grad2016	PRJEB7904	ERR854976	SAMEA3165240	No data	S	No data	R	0.5	S	0.015	S	0.008	S	0.004	S	No data	I	new	new	4	1893	59	39	67	157	147	153	133	677	9.001	58	100	1	100	2	100	-	-	-	-	tetM	rpsJ_V57M	rplD_G70D	-	-
SAMEA3165242	2012	United States	GCGS887	grad2016	PRJEB7904	ERR854901	SAMEA3165242	No data	S	No data	R	1	S	0.25	R	0.06	S	16	R	No data	R	1407	908	110	1901	109	39	170	111	148	153	65	90	34.001	1	11	1	1	3	100	-	-	-	-	-	rpsJ_V57M	-	porB1b_G120K	-
SAMEA3165247	2012	United States	GCGS1095	grad2016	PRJEB7904	ERR854905	SAMEA3165247	No data	S	No data	I	0.5	S	1	R	1	R	0.015	S	No data	I	14647	8508	5	1893	59	39	67	157	147	153	133	198	9.001	25	16	1	100	2	100	-	-	-	-	-	rpsJ_V57M	-	-	-
SAMEA3165297	2011	United States	GCGS331	grad2016	PRJEB7904	ERR854991	SAMEA3165297	No data	S	No data	R	0.25	S	0.015	S	0.008	S	4	R	No data	R	3307	30	743	1588	59	39	67	158	148	71	65	249	19.001	38	1	1	7	3	100	-	-	-	blaTEM	tetM	rpsJ_V57M	-	-	-
SAMEA3165306	2011	United States	GCGS334	grad2016	PRJEB7904	ERR854993	SAMEA3165306	No data	S	No data	R	0.25	S	0.015	S	0.008	S	1	R	No data	I	8500	5026	743	1588	59	39	67	158	148	71	65	53	19.001	38	1	1	7	15	100	-	-	-	-	tetM	rpsJ_V57M	-	-	-
SAMEA3165312	2011	United States	GCGS346	grad2016	PRJEB7904	ERR854995	SAMEA3165312	No data	S	No data	R	0.03	S	0.015	S	0.008	S	2	R	No data	I	3307	30	743	1588	59	39	67	158	148	71	65	249	19.001	38	1	1	7	3	100	-	-	-	-	tetM	rpsJ_V57M	-	-	-
SAMEA3165314	2012	United States	GCGS545	grad2016	PRJEB7904	ERR854950	SAMEA3165314	No data	S	No data	I	0.5	S	0.03	S	0.008	S	0.015	S	No data	I	2992	1808	29	9363	126	39	67	238	148	153	133	63	2.001	9	1	100	100	100	100	-	-	-	-	-	rpsJ_V57M	-	-	-
SAMEA3165316	2011	United States	GCGS739	grad2016	PRJEB7904	ERR854996	SAMEA3165316	No data	S	No data	R	0.06	S	0.06	S	0.015	S	2	R	No data	I	9304	5411	743	1588	59	39	67	158	148	71	65	53	19.001	38	1	1	7	15	100	-	-	-	-	tetM	rpsJ_V57M	-	-	-
SAMEA3165317	2012	United States	GCGS552	grad2016	PRJEB7904	ERR854952	SAMEA3165317	No data	S	No data	I	0.5	S	0.03	S	0.008	S	0.015	S	No data	I	756	87	4	9363	126	39	67	238	148	153	133	382	2.001	9	4	100	100	100	100	-	-	-	-	-	rpsJ_V57M	-	-	-
SAMEA3165318	2012	United States	GCGS335	grad2016	PRJEB7904	ERR854953	SAMEA3165318	No data	S	No data	I	0.5	S	0.015	S	0.008	S	0.015	S	No data	I	new	2150	5	1893	59	39	67	157	147	153	133	1588	9.003	25	4	1	100	2	100	-	-	-	-	-	rpsJ_V57M	-	-	-
SAMEA3165320	2012	United States	GCGS560	grad2016	PRJEB7904	ERR854954	SAMEA3165320	No data	S	No data	I	16	R	0.03	S	0.008	S	0.015	S	No data	I	2992	1808	29	9363	126	39	67	238	148	153	133	64	2.001	9	1	100	100	100	2	-	-	23S_rDNA_c2597t	-	-	rpsJ_V57M	-	-	-
SAMEA3165321	2012	United States	GCGS732	grad2016	PRJEB7904	ERR854955	SAMEA3165321	No data	S	No data	I	1	S	0.06	S	0.008	S	0.015	S	No data	I	14771	8581	29	9363	126	39	67	238	148	153	133	63	2.001	9	1	100	100	100	100	-	-	-	-	-	rpsJ_V57M	-	-	-
SAMEA3165322	2011	United States	GCGS369	grad2016	PRJEB7904	ERR854998	SAMEA3165322	No data	S	No data	R	0.06	S	0.015	S	0.008	S	2	R	No data	R	5256	1961	4	8136	109	39	170	78	148	154	65	625	2.002	54	14	100	1	4	100	-	-	-	blaTEM	tetM	rpsJ_V57M	-	-	-
SAMEA3165323	2012	United States	GCGS347	grad2016	PRJEB7904	ERR854956	SAMEA3165323	No data	S	No data	R	0.5	S	0.015	S	0.008	S	0.015	S	No data	I	new	new	182	11412	59	39	67	111	147	153	133	676	9.001	58	3	1	100	2	100	-	-	-	-	tetM	rpsJ_V57M	rplD_G70D	-	-
SAMEA3165324	2012	United States	GCGS571	grad2016	PRJEB7904	ERR854957	SAMEA3165324	No data	S	No data	R	0.5	S	0.03	S	0.015	S	0.015	S	No data	I	8418	28	620	1893	59	39	67	157	147	153	133	961	9.004	58	3	1	100	2	100	-	-	-	-	tetM	rpsJ_V57M	rplD_G70D	-	-
SAMEA3165327	2012	United States	GCGS349	grad2016	PRJEB7904	ERR854959	SAMEA3165327	No data	S	No data	R	0.5	S	0.015	S	0.008	S	0.015	S	No data	I	8418	28	620	1893	59	39	67	157	147	153	133	961	9.004	58	3	1	100	2	100	-	-	-	-	tetM	rpsJ_V57M	rplD_G70D	-	-
SAMEA3165329	2011	United States	GCGS383	grad2016	PRJEB7904	ERR855000	SAMEA3165329	No data	S	No data	R	0.125	S	0.015	S	0.008	S	2	R	No data	R	3307	30	743	1588	59	39	67	158	148	71	65	249	19.001	38	1	1	7	3	100	-	-	-	blaTEM	tetM	rpsJ_V57M	-	-	-
SAMEA3165330	2012	United States	GCGS350	grad2016	PRJEB7904	ERR854961	SAMEA3165330	No data	S	No data	I	0.25	S	0.015	S	0.015	S	0.015	S	No data	I	508	356	28	10931	109	39	67	78	149	71	65	86	22.001	19	6	1	100	2	100	-	-	-	-	-	-	-	-	-
SAMEA3165335	2012	United States	GCGS378	grad2016	PRJEB7904	ERR854965	SAMEA3165335	No data	S	No data	I	1	S	0.015	S	0.008	S	0.015	S	No data	I	new	new	29	9363	126	39	67	238	148	153	133	63	2.001	9	1	100	100	100	100	-	-	-	-	-	rpsJ_V57M	-	-	-
SAMEA3165336	2012	United States	GCGS379	grad2016	PRJEB7904	ERR854966	SAMEA3165336	No data	S	No data	I	0.5	S	0.015	S	0.008	S	0.015	S	No data	I	new	new	29	9363	126	39	67	238	148	153	133	63	2.001	9	1	100	100	100	100	-	-	-	-	-	rpsJ_V57M	-	-	-
SAMEA3165337	2011	United States	GCGS593	grad2016	PRJEB7904	ERR855002	SAMEA3165337	No data	S	No data	I	0.25	S	0.03	S	0.008	S	0.015	S	No data	I	7960	262	24	9363	126	39	67	238	148	153	133	63	2.001	9	1	100	100	100	100	-	-	-	-	-	rpsJ_V57M	-	-	-
SAMEA3165339	2012	United States	GCGS396	grad2016	PRJEB7904	ERR854968	SAMEA3165339	No data	S	No data	R	0.125	S	0.015	S	0.008	S	4	R	No data	R	3307	30	743	1588	59	39	67	158	148	71	65	249	19.001	38	1	1	7	3	100	-	-	-	blaTEM	tetM	rpsJ_V57M	-	-	-
SAMEA3165342	2012	United States	GCGS398	grad2016	PRJEB7904	ERR854970	SAMEA3165342	No data	S	No data	R	0.03	S	0.015	S	0.008	S	0.5	R	No data	I	new	714	743	1588	59	39	67	158	148	71	65	248	19.001	38	3	1	7	15	100	-	-	-	-	tetM	rpsJ_V57M	-	-	-
SAMEA3165360	2011	United States	GCGS603	grad2016	PRJEB7904	ERR855019	SAMEA3165360	No data	S	No data	R	0.125	S	0.03	S	0.008	S	4	R	No data	R	3307	30	743	1588	59	39	67	158	148	71	65	684	19.001	38	1	1	7	26	100	-	-	-	blaTEM	tetM	rpsJ_V57M	-	-	-
SAMEA3165361	2011	United States	GCGS764	grad2016	PRJEB7904	ERR855020	SAMEA3165361	No data	S	No data	R	0.25	S	0.06	S	0.03	S	1	R	No data	I	3307	30	743	1588	59	39	67	158	148	71	65	389	5.002	38	1	1	7	15	100	-	-	-	-	tetM	rpsJ_V57M	-	-	-
SAMEA3165363	2011	United States	GCGS768	grad2016	PRJEB7904	ERR855022	SAMEA3165363	No data	S	No data	I	0.125	S	0.06	S	0.03	S	0.015	S	No data	I	10639	2835	22	12087	59	39	67	157	775	153	133	144	9.001	25	3	100	100	2	100	-	-	-	-	-	rpsJ_V57M	-	-	-
SAMEA3165366	2011	United States	GCGS641	grad2016	PRJEB7904	ERR855025	SAMEA3165366	No data	S	No data	I	0.25	S	0.03	S	0.03	S	4	S	No data	I	9230	5493	29	9363	126	39	67	238	148	153	133	63	2.001	9	1	100	100	100	100	-	-	-	-	-	rpsJ_V57M	-	-	-
SAMEA3165371	2011	United States	GCGS667	grad2016	PRJEB7904	ERR855030	SAMEA3165371	No data	S	No data	R	0.5	S	0.03	S	0.015	S	4	R	No data	I	3307	30	743	1588	59	39	67	158	148	71	65	249	19.001	38	1	1	7	3	100	-	-	-	-	tetM	rpsJ_V57M	-	-	-
SAMEA3165372	2011	United States	GCGS469	grad2016	PRJEB7904	ERR855031	SAMEA3165372	No data	S	No data	R	0.25	S	0.015	S	0.008	S	4	R	No data	I	3307	30	743	1588	59	39	67	158	148	71	65	249	19.001	38	1	1	7	3	100	-	-	-	-	tetM	rpsJ_V57M	-	-	-
SAMEA3165376	2011	United States	GCGS494	grad2016	PRJEB7904	ERR855035	SAMEA3165376	No data	S	No data	R	0.125	S	0.015	S	0.008	S	4	R	No data	R	3307	30	743	1588	59	39	67	158	148	71	65	249	19.001	38	1	1	7	3	100	-	-	-	blaTEM	tetM	rpsJ_V57M	-	-	-
SAMEA3165385	2012	United States	GCGS430	grad2016	PRJEB7904	ERR855044	SAMEA3165385	No data	S	No data	R	0.25	S	0.015	S	0.008	S	0.015	S	No data	R	161	91	76	1902	109	39	170	158	148	153	65	1545	22.01	35	8	1	100	7	100	-	-	-	-	tetM	rpsJ_V57M	-	porB1b_G120K	porB1b_A121D
SAMEA3165389	2012	United States	GCGS658	grad2016	PRJEB7904	ERR855048	SAMEA3165389	No data	S	No data	I	1	R	0.03	S	0.015	S	0.015	S	No data	I	8300	4978	29	9363	126	39	67	238	148	153	133	193	2.001	39	11	100	100	100	100	-	-	-	-	-	rpsJ_V57M	-	porB1b_G120K	-
SAMEA3165390	2012	United States	GCGS787	grad2016	PRJEB7904	ERR855049	SAMEA3165390	No data	S	No data	I	0.5	S	0.06	S	0.008	S	0.015	S	No data	I	3391	2047	29	9363	126	39	67	238	148	153	133	392	9.001	9	1	100	100	100	100	-	-	-	-	-	rpsJ_V57M	-	-	-
SAMEA3165395	2012	United States	GCGS472	grad2016	PRJEB7904	ERR855054	SAMEA3165395	No data	S	No data	R	1	S	0.015	S	0.008	S	0.015	S	No data	I	465	18	4	1893	59	39	67	157	147	153	133	1546	9.005	58	100	1	100	2	100	-	-	-	-	tetM	rpsJ_V57M	rplD_G70D	-	-
SAMEA3165396	2012	United States	GCGS479	grad2016	PRJEB7904	ERR855055	SAMEA3165396	No data	S	No data	I	0.5	S	0.015	S	0.008	S	0.015	S	No data	I	508	356	28	10931	109	39	67	78	149	71	65	86	22.001	19	6	1	100	2	100	-	-	-	-	-	-	-	-	-
SAMEA3165399	2012	United States	GCGS678	grad2016	PRJEB7904	ERR855058	SAMEA3165399	No data	S	No data	R	0.125	S	0.03	S	0.015	S	0.015	S	No data	I	752	289	16	11184	109	39	67	78	148	153	133	691	2.001	107	100	100	100	100	100	-	-	-	-	tetM	rpsJ_V57M	-	-	-
SAMEA3165400	2012	United States	GCGS495	grad2016	PRJEB7904	ERR855059	SAMEA3165400	No data	S	No data	R	0.25	S	0.015	S	0.008	S	16	R	No data	I	3307	30	743	1588	59	39	67	158	148	71	65	53	19.001	38	1	1	7	15	100	-	-	-	-	tetM	rpsJ_V57M	-	-	-
SAMEA3165401	2012	United States	GCGS496	grad2016	PRJEB7904	ERR855060	SAMEA3165401	No data	S	No data	I	0.5	S	0.015	S	0.008	S	0.015	S	No data	I	8420	30	934	7828	126	39	67	158	148	153	133	692	19.001	108	1	1	100	7	100	-	-	-	-	-	rpsJ_V57M	-	-	-
SAMEA3165407	2005	United States	GCGS267	grad2016	PRJEB7904	ERR855071	SAMEA3165407	No data	S	No data	I	4	R	0.008	S	0.008	S	0.004	S	No data	I	64	50	29	1580	126	39	67	111	148	153	133	57	2.001	25	3	100	100	100	2	-	-	23S_rDNA_c2597t	-	-	rpsJ_V57M	-	-	-
SAMEA3165408	2012	United States	GCGS336	grad2016	PRJEB7904	ERR855062	SAMEA3165408	No data	S	No data	I	0.25	S	0.015	S	0.008	S	0.015	S	No data	I	new	new	189	1893	59	39	67	157	147	153	133	141	9.001	25	100	1	100	2	100	-	-	-	-	-	rpsJ_V57M	-	-	-
[truncated: 13,195 more rows]
[truncated: 108 more columns]
