# Supplementary material for: Gonococcal Genetic Island in the Global Neisseria gonorrhoeae Population: A Model of Genetic Diversity and Association with Resistance to Antimicrobials
Source: Microorganisms. 2023 Jun 10;11(6):1547. doi: 10.3390/microorganisms11061547 (PMC10301925; doi:10.3390/microorganisms11061547)
Supplement: Supplementary file 1 [file microorganisms-11-01547-s001.zip › Table S3. Population characteristics of GGI genes.xlsx]

## Sheet: Table S3
Table S3. Population characteristics of GGI genes.
Gene Name	Gene Function	θπ (Tamura-Nei 1993)	Tajima's D With Empty Gene Sequences	Tajima's D Without Empty Gene Sequences	dN/dS	SE(dN-dS)
Total	-	0.00529373	-2.066	-2.066	0.458452	0.000469
NEIS2315 (yaa)	Conjugal transfer protein	0.0155	-2.24814	-2.24485	0.06182	0.01443
NEIS2250 (traD)	Putative docking protein	0.00151	-2.65896	-2.65475	0.29165	0.00122
NEIS2251 (traI)	Putative nicking enzyme	0.000787	-2.67066	-2.65489	0.41217	0.0007
NEIS2252 (yaf)	Hypothetical protein	0.00104	-2.63492	-2.63344	0.02086	0.00403
NEIS2253 (ltgX)	Peptidoglycan hydrolase	0.000952	-2.6437	-2.6465	0.90345	0.00127
NEIS2254 (yag)	Outer membrane protein	3.6e-05	-2.66944	-2.11751	6.89579	2e-05
NEIS2255 (traA)	Putative transfer protein	0.000334	-2.41598	-1.82878	0.68235	0.00039
NEIS2256 (traL)	Pilus assembly protein	0.000217	-2.60503	-2.60148	0.04801	0.00081
NEIS2257 (traE)	Pilus biogenesis protein	0.00035	-2.66428	-2.66317	21.1329	0.00039
NEIS2258 (traK)	Pilus assembly protein	0.00128	-2.6488	-2.64434	1.26052	0.00115
NEIS2259 (traB)	Conjugal transfer protein	0.000955	-2.63477	-2.63709	0.27964	0.00153
NEIS2260 (dsbC)	Protein disulphide isomerase	0.000117	-2.68067	-2.67936	0.18306	0.00018
NEIS2261 (traV)	Putative transfer protein	9.88e-05	-2.66345	-2.66212	0.10183	0.00024
NEIS2262 (traC)	Pilus assembly protein	0.000322	-2.63822	-2.63694	0.15635	0.00043
NEIS2263 (ybe)	Hypothetical protein	0.000699	-2.60371	-2.63539	35.878	0.00089
NEIS2264 (trbI)	Conjugal transfer protein	0.000494	-2.51694	-2.51751	0.1512	0.00124
NEIS2265 (traW)	Pilus biogenesis protein	0.000675	-2.63257	-2.63062	14.0662	0.00071
NEIS2266 (traU)	Pilus biogenesis protein	0.00114	-2.61544	-2.61088	0.00902	0.00251
NEIS2267 (trbC)	Conjugative transfer protein	0.00496	-2.53012	-2.53103	0.06467	0.00521
NEIS2268 (ybi)	Mating-pair stabilisation protein	0.00182	-2.60778	-2.6034	0.15987	0.0019
NEIS2269 (traN)	Mating-pair stabilisation protein	0.000248	-2.6249	-2.62453	0.24917	0.00038
NEIS2270 (ycb)	Hypothetical protein	0.0013	-2.59516	-2.60931	0.00749	0.0041
NEIS2271 (traF)	Pilus assembly protein	0.000562	-2.62626	-2.62457	0.02163	0.00147
NEIS2272 (traH)	Pilus assembly protein	0.00515	-2.47503	-2.47293	0.12232	0.00396
NEIS2273 (traG)	Pilus assembly protein; mating-pair stabilisation	0.0783	-0.339494	-0.311649	0.64341	0.00487
NEIS2274 (atlA)	Peptidoglycan transglycosylase	0.00513	2.7336	-2.5435	0.10456	0.00613
NEIS2275 (ych)	Hypothetical protein	0.00291	2.5884	-2.71691	2.55452	1e-05
NEIS2311 (eppA)	Hypothetical protein	0.00347	2.66257	-2.46602	0.62237	0.00432
NEIS2312 (ych1)	Hypothetical protein	1.59e-05	2.42331	-2.51824	0.28323	0.00434
NEIS2276 (exp1)	Exported protein	0.00762	0.730196	0.329256	0.14804	0.00547
NEIS2277 (cspA)	RNA/ssDNA binding protein	0.00953	4.25212	0.271892	0.78296	0.00524
NEIS2278 (exp2)	Hypothetical protein	0.0016	2.48435	3.40933	0.28742	0.00512
NEIS2279 (yda)	Hypothetical protein	0.00375	-2.5553	-2.54819	0.14541	0.00337
NEIS2280 (ydbA)	Hypothetical protein	0.00141	-2.6354	-2.63924	0.18795	0.00247
NEIS2281 (ydbB)	Hypothetical protein	0.00239	-2.60288	-2.60118	0.22421	0.00507
NEIS2282 (ydcA)	Putative protease	4.15e-05	-2.62811	-2.62667	1.22473	4e-05
NEIS2283 (ydcB)	Hypothetical protein	0.0025	-2.60345	-2.60313	9.02353	0.00146
NEIS2284 (ydd)	Hypothetical protein	0.00218	-2.4163	-2.41032	0.96871	0.00229
NEIS2285 (ydeA)	Hypothetical protein	2.19e-05	-2.33296	-2.46331	1.9332	1e-05
NEIS2286 (ydeB)	Hypothetical protein	0.000269	-2.66535	-2.66345	0.5036	0.00044
NEIS2287 (ydf)	Hypothetical protein	0.00103	-2.57224	-2.56864	27.4915	0.0009
NEIS2288 (ydg)	Putative DNA methylase	0.000826	-2.60079	-2.62306	0.1849	0.00147
NEIS2289 (ydhA)	Putative DNA methylase	0.00163	-2.64297	-2.64145	0.86218	0.00182
NEIS2290 (ydhB)	Hypothetical protein	0.00122	-2.36919	-2.59288	13.9226	0.00105
NEIS2291 (ydi)	Hypothetical protein	0.000668	-1.48145	-1.47899	127.257	0.00083
NEIS2292 (yea)	Putative helicase	0.00179	-2.52928	-2.55091	0.3483	0.00131
NEIS2293 (yeb)	Putative N-acetyltransferase	0.00342	-2.4995	-2.54043	0.89704	0.00324
NEIS2294 (yecA)	Hypothetical protein	0.0011	-2.54613	-2.58489	0.0117	0.00331
NEIS2295 (yecB) repeat №1	Repeat containing protein	0.0077	-0.41056	-0.430354	0.11344	0.00917
NEIS2295 (yecB) repeat №2	Repeat containing protein	0.00783	5.31219	2.70474	0.21717	0.01233
NEIS2296 (yedA)	Hypothetical protein	0.00112	-2.62373	-2.62371	0.49995	0.00184
NEIS2297 (yedB)	Hypothetical protein	0.00133	-2.62921	-2.61356	53.6136	0.00134
NEIS2298 (yee)	Hypothetical protein	0.00138	-2.61399	-2.61814	84.6993	0.00169
NEIS2314	Hypothetical protein	0.000185	-2.63982	-2.63624	7.88998	0.0001
NEIS2313	Hypothetical protein	0.000208	-2.66432	-2.65935	0.25214	0.00035
NEIS2299 (yegA)	Hypothetical protein	3.14e-05	-2.66867	-2.66752	1.86859	1e-05
NEIS2300 (yegB)	Hypothetical protein	-	-2.19621	-0.276897	-	-
NEIS2301 (yeh)	Hypothetical protein	0.00199	-1.9735	-1.97995	0.63839	0.00296
NEIS2302 (topB)	DNA topoisomerase	0.000772	-2.64691	-2.64612	0.22785	0.00116
NEIS2303 (ssbB)	ssDNA binding protein	0.000152	-2.63403	-2.64709	21.9156	0.00016
NEIS2304 (yfa)	Hypothetical protein	0.000106	-2.52952	-2.59354	0.33731	0.00013
NEIS2305 (yfb)	Hypothetical protein	0.00112	-2.64615	-2.64494	0.22141	0.00145
NEIS2306 (yfd)	Putative tonB-like transporter	0.000484	-2.65498	-2.66129	0.9989	0.00042
NEIS2307 (yfeA)	Hypothetical protein	0.000682	-2.65335	-2.6269	0.01954	0.00278
NEIS2308 (yfeB)	Hypothetical protein	0.00173	-2.59772	-2.55985	0.29792	0.00401
NEIS2309 (parB)	Chromosome partitioning protein	0.00166	-2.40178	-2.40036	0.17451	0.00233
NEIS2310 (parA)	Chromosome partitioning protein	0.00043	-2.59287	-2.59813	3.15835	0.00049
	Tajima D
Supercluster A1	-2.62236
Supercluster A2	-0.945082
Superclusters A1+A2	-2.17853
Supercluster B	-1.25254
	TN93
Superclusters A1+A2+B	0.00529373
Superclusters A1+A2	0.00238433
Supercluster B	0.00153459
