# Supplementary material for: Gonococcal Genetic Island in the Global Neisseria gonorrhoeae Population: A Model of Genetic Diversity and Association with Resistance to Antimicrobials
Source: Microorganisms. 2023 Jun 10;11(6):1547. doi: 10.3390/microorganisms11061547 (PMC10301925; doi:10.3390/microorganisms11061547)
Supplement: Supplementary file 1 [file microorganisms-11-01547-s001.zip › Table S5. NG-MAST and MLST heterogeneity in clusters.xlsx]

## Sheet: Table S5
Table S5. NG-MAST and MLST heterogeneity in clusters.
Cluster Name	Supercluster Name	Number of genomes	Most common NG-MAST types, % of presence in cluster	Heterogeneity of NG-MAST types within a cluster, in nucleotides	Most common MLST types, % of presence in cluster	Heterogeneity of MLST types within a cluster, in nucleotides
1	A1	105	12 (46,1%), 44 (36,3%), 238 (5,9%)	1.03595	1918 (97,1%), 10305 (1%), 12089 (1%)	0.0285714
2	A1	4588	1407 (14,2%), 5441 (11,1%), 2400 (7,6%)	214.807	1901 (35,1%), 7363 (17%), 8156 (13,2%)	2.6387
3	A1	650	5 (44,4%), 21 (21,2%), 1034 (6,2%)	38.9202	1579 (81,7%), 1903 (5,7%), 11181 (4%)	0.52
5	A1	121	new (100%)	-	11981 (97,5%), 13934 (2,5%)	0.0247934
19	A1	24	2992 (58,3%), 10565 (4,2%), 11008 (4,2%)	216.375	9363 (75%), 1901 (8,3%), 11249 (4,2%)	1.375
22	A1	86	7958 (22%), 5004 (14%), 7577 (10%)	168.453	10932 (70,9%), 11967 (11,6%), 1601 (4,7%)	0.813954
23	A1	13	5887 (83,3%), 4018 (16,7%)	38.6667	1594 (100%)	0
27	A1	38	2992 (42,9%), 14261 (17,1%), 6800 (17,1%)	222.476	11864 (55,3%), 1901 (26,3%), 1579 (15,8%)	2.97368
34	A1	25	3435 (36,4%), 1034 (18,2%), 10011 (9,1%)	265.848	6716 (24%), 8156 (24%), 1903 (16%)	2.8
37	A1	23	5 (100%)	0	8145 (91,3%), 1584 (4,3%), 9903 (4,3%)	0.0869565
41	A1	24	new (100%)	-	7826 (100%)	0
50	A1	10	8213 (50%), 7589 (25%), 9634 (25%)	56.25	12467 (30%), 13149 (30%), 16741 (20%)	1.8
4	A2	43	6339 (29,6%), 8234 (29,6%), 8271 (18,5%)	75.8889	1601 (72,1%), 13413 (9,3%), 13532 (4,7%)	0.581395
6	A2	391	51 (57,1%), 25 (20,5%), 239 (3%)	2.8643	11990 (57,3%), 1594 (37,1%), new (2,3%)	0.475703
7	A2	484	4186 (83,6%), 9909 (5,9%), 6767 (2,1%)	2.54098	7359 (99,2%), 8155 (0,4%), new (0,4%)	0.00413223
9	A2	59	231 (20%), 3556 (10%), 186 (7,5%)	24.6417	1585 (37,3%), 8154 (22%), 12536 (16,9%)	1.62712
10	A2	407	645 (11,1%), 5268 (10,1%), 8919 (8,8%)	234.368	1584 (50,4%), 10317 (10,3%), 1599 (8,1%)	1.40295
11	A2	196	5793 (40,9%), 1780 (37,4%), 11674 (4,1%)	192.768	11516 (86,7%), 11980 (3,6%), 13484 (3,6%)	0.147959
12	A2	20	4 (53,3%), 69 (40%), 8378 (6,7%)	66.4222	8114 (100%)	0
15	A2	241	11461 (76,8%), 14764 (17,5%), 13484 (1,9%)	24.9321	1599 (100%)	0
18	A2	63	14386 (35,3%), 6154 (29,4%), 2649 (11,8%)	91.5686	1893 (61,9%), 11366 (17,5%), 11370 (4,8%)	0.968254
20	A2	19	1285 (30%), 7735 (20%), 10790 (10%)	337.6	8776 (31,6%), 11241 (21,1%), 1932 (15,8%)	4.36842
24	A2	23	8 (38,1%), 6837 (23,8%), 545 (19%)	177.651	1595 (73,9%), 14443 (8,7%), 1906 (8,7%)	0.217391
26	A2	163	26 (87,3%), 7970 (3,5%), 843 (2,8%)	105.223	1584 (88,3%), new (5,5%), 8145 (4,3%)	0.214724
28	A2	48	40 (28%), 7175 (24%), 684 (16%)	58.2133	1590 (83,3%), 1601 (8,3%), 11415 (2,1%)	0.291667
29	A2	87	387 (41%), 13113 (13,3%), 5743 (12%)	34.1647	8135 (80,5%), 1892 (10,3%), 1588 (4,6%)	0.655172
30	A2	10	1028 (33,3%), 2382 (16,7%), 2476 (16,7%)	209.222	7367 (80%), 1579 (20%)	0.2
31	A2	24	387 (58,3%), 13113 (16,7%), 5743 (16,7%)	0.875	8135 (100%)	0
32	A2	10	1285 (100%)	0	8776 (100%)	0
33	A2	81	8997 (26,3%), 6064 (10,5%), 5027 (7,9%)	318.193	11191 (27,2%), 8776 (18,5%), 1599 (14,8%)	2.18519
35	A2	44	7753 (44%), 6058 (16%), 9650 (16%)	160.453	10622 (59,1%), 14394 (20,5%), 8775 (9,1%)	0.977273
39	A2	17	11867 (75%), 11520 (25%)	0.333333	14420 (100%)	0
42	A2	16	6129 (58,3%), 387 (33,3%), 5743 (8,3%)	1.41667	1892 (100%)	0
43	A2	12	10998 (80%), 2670 (10%), 6950 (10%)	375.933	14434 (66,7%), 13913 (16,7%), 14432 (8,3%)	1.16667
47	A2	23	13105 (33,3%), 13118 (33,3%), 25 (8,3%)	245.694	10634 (60,9%), 11255 (17,4%), 6962 (17,4%)	1.08696
48	A2	14	14760 (100%)	0	10622 (100%)	0
49	A2	10	7803 (100%)	0	12040 (100%)	0
51	A2	14	471 (54,5%), 7621 (36,4%), 7619 (9,1%)	64.5455	1585 (100%)	0
8	B	45	25 (51,4%), 5582 (16,2%), 51 (8,1%)	172.631	1594 (46,7%), 9363 (28,9%), 12086 (8,9%)	3.02222
13	B	114	384 (45,4%), 13252 (16,5%), 190 (10,3%)	122.863	1596 (94,7%), 11993 (5,3%)	0.0526316
14	B	45	2992 (27,8%), 225 (13,9%), 2051 (8,3%)	231.417	1901 (35,6%), 11428 (22,2%), 12982 (17,8%)	3.51111
16	B	499	292 (49,1%), 8517 (15%), 210 (5,4%)	191.509	8122 (55,9%), 1893 (14,6%), 1600 (6%)	2.93788
17	B	66	1993 (85,5%), 5714 (8,1%), 14006 (4,8%)	0.844086	11177 (84,8%), 14009 (7,6%), 13970 (3%)	0.181818
21	B	27	4404 (30%), 1752 (10%), 2 (10%)	248.4	11414 (48,1%), 10316 (40,7%), 11257 (7,4%)	0.703704
25	B	19	3227 (11,8%), 5185 (11,8%), 10785 (5,9%)	54.549	1892 (89,5%), 11174 (5,3%), 8135 (5,3%)	0.105263
36	B	97	10800 (41,6%), 807 (19,1%), 228 (11,2%)	1.15356	1594 (77,3%), 14013 (6,2%), 15101 (5,2%)	0.28866
38	B	14	25 (33,3%), 358 (33,3%), 38 (11,1%)	155.667	8149 (57,1%), 16738 (21,4%), 16759 (21,4%)	0.642857
40	B	14	2 (50%), 2533 (50%)	129	1590 (64,3%), 10634 (35,7%)	0.357143
44	B	10	807 (50%), 5941 (20%), 1544 (10%)	1.13333	1594 (100%)	0
45	B	20	13595 (23,5%), 10804 (11,8%), 11047 (11,8%)	177.549	1901 (65%), 10932 (5%), 1579 (5%)	1.4
46	B	12	8307 (50%), 8223 (33,3%), 2514 (16,7%)	55.6667	6962 (100%)	0
