# Supplementary material for: Gonococcal Genetic Island in the Global Neisseria gonorrhoeae Population: A Model of Genetic Diversity and Association with Resistance to Antimicrobials
Source: Microorganisms. 2023 Jun 10;11(6):1547. doi: 10.3390/microorganisms11061547 (PMC10301925; doi:10.3390/microorganisms11061547)
Supplement: Supplementary file 1 [file microorganisms-11-01547-s001.zip › Table S6. Antimicrobial resistance among isolates with different GGI status.xlsx]

## Sheet: Лист1
Table S6. Antimicrobial resistance among isolates with different GGI status
GGI status	Number of isolates with susceptibility/resistance to antimicrobials
	Spectinomycin			Tetracycline total				Tetracycline without tetM				Azithromycin			Сefixime				Ciprofloxacin				Penicillin total				Penicillin without blaTEM
	susceptible	resistant	p-value	Tet_I	Tet_R	Tet_S	p-value	Tet_I	Tet_R	Tet_S	p-value	Azm_R	Azm_S	p-value	Cef_I	Cef_R	Cef_S	p-value	Cip_I	Cip_R	Cip_S	p-value	Pen_I	Pen_R	Pen_S	p-value	Pen_I	Pen_R	Pen_S	p-value
GGI is present	9775	1		3268	4771	1737		3268	4771	1737		382	9394		3	1450	8323		2	4324	5450		6561	2742	473		6549	1524	457
First comparison
GGI is absent	4986	1	<<0.001	3448	1507	32	<<0.001	3448	637	32	<<0.001	986	4001	<<0.001	2	129	4856	<<0.001	3	2037	2947	<<0.001	3610	1371	6	<<0.001	3606	315	6	<<0.001
GGI is present & functional	7656	0		2470	4387	799		2468	3345	799		299	7357		3	1341	6312		1	3841	3814		5037	2423	196		5029	1386	195
Second comparison
GGI is broken (non-functional)	2102	1	<<0.001	795	383	925	<<0.001	795	255	925	<<0.001	83	2020	0.9816	0	109	1994	<<0.001	1	482	1620	<<0.001	1523	318	262	<<0.001	1520	138	262	<<0.001
GGI is working (functional)	7656	0		2470	4387	799		2468	3345	799		299	7357		3	1341	6312		1	3841	3814		5037	2423	196		5029	1386	195
