# Supplementary figures and images for: Gonococcal Genetic Island in the Global Neisseria gonorrhoeae Population: A Model of Genetic Diversity and Association with Resistance to Antimicrobials
Source: MDPI journal article supplement (doi:10.3390/microorganisms11061547), 2023-06-10

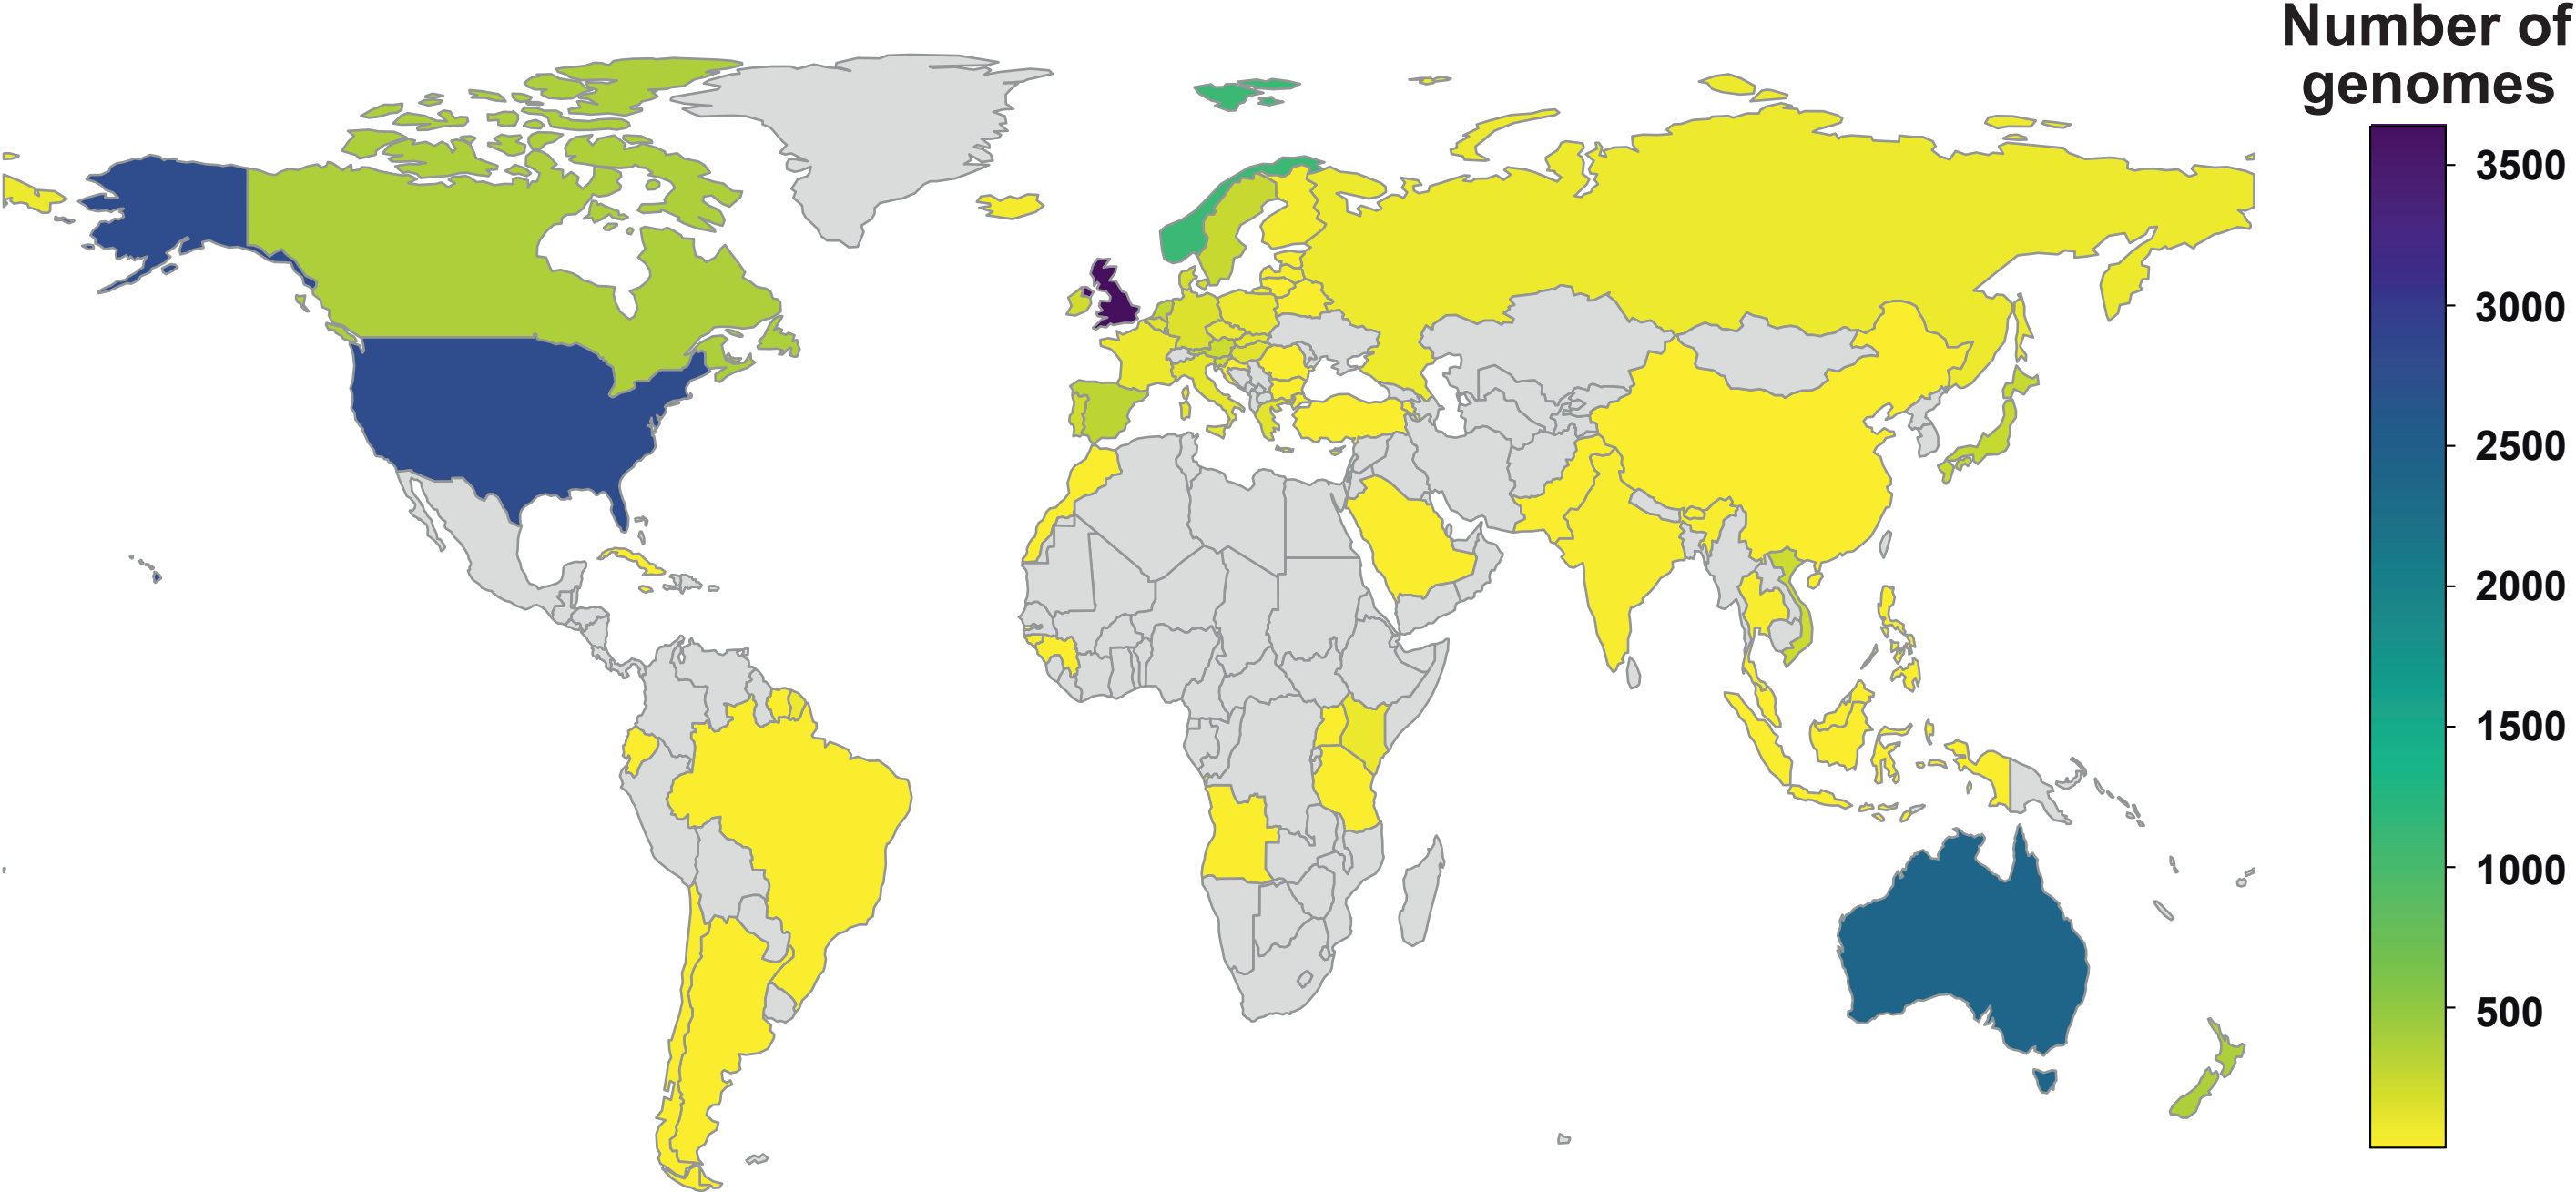

Figure S1. Distribution of downloaded *N. gonorrhoeae* genomes by country.

Supplement: s1 [file s1]
